# Supplementary material
Source: PubMed Central journal article supplement (PMC9106889)
Supplement: NIHMS1788166-supplement-2.pdf [file NIHMS1788166-supplement-2.pdf]

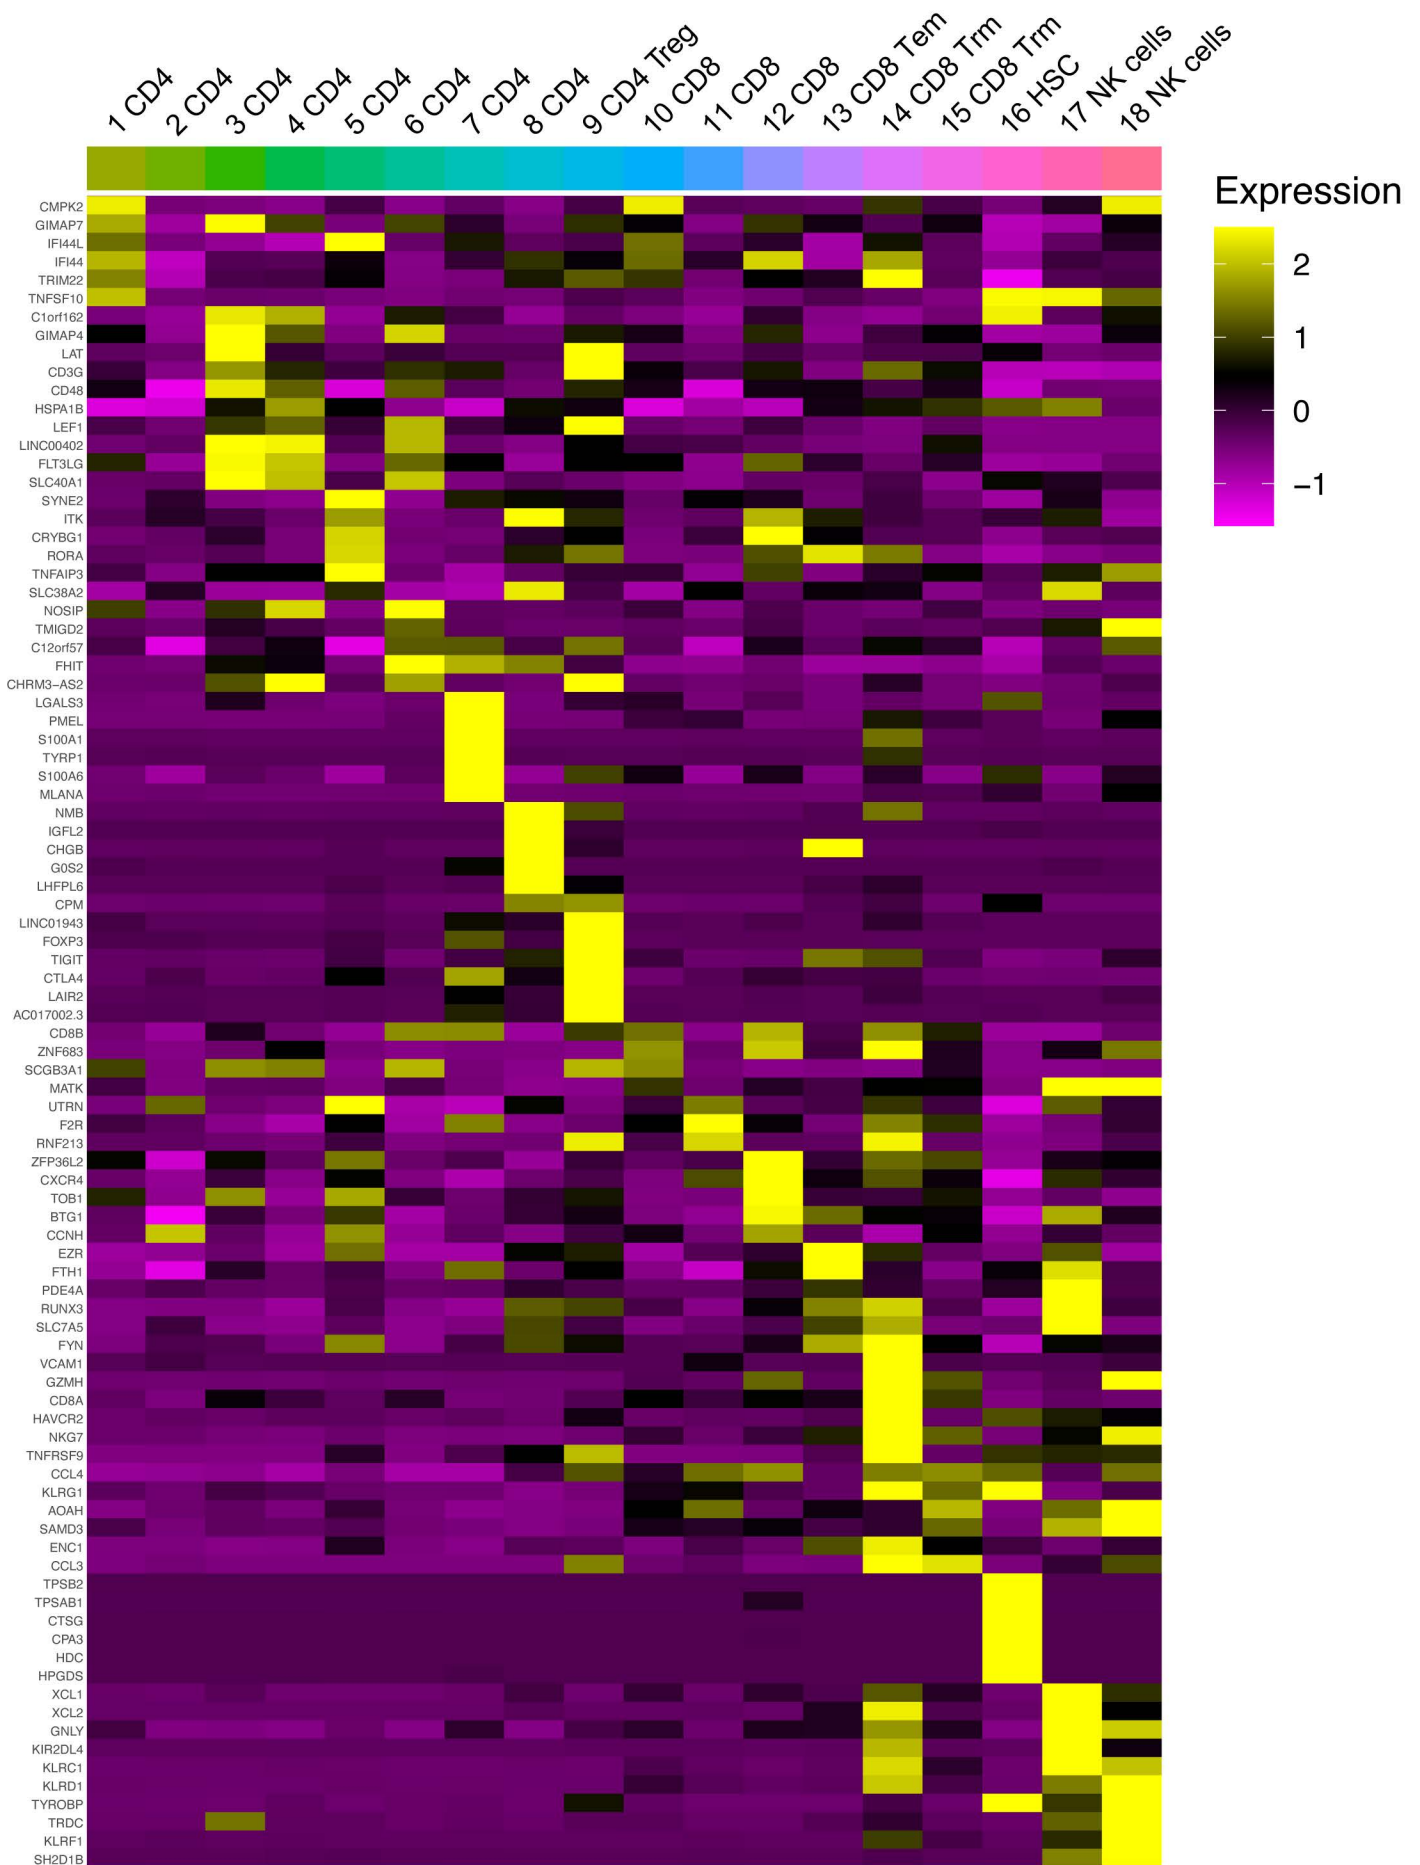

**Supplemental Figure 4.** Unsupervised clustering identifies 15 subsets of T cells, one cluster of hematopoietic stem cells and 2 sub-clusters of NK cells in acral melanoma samples.

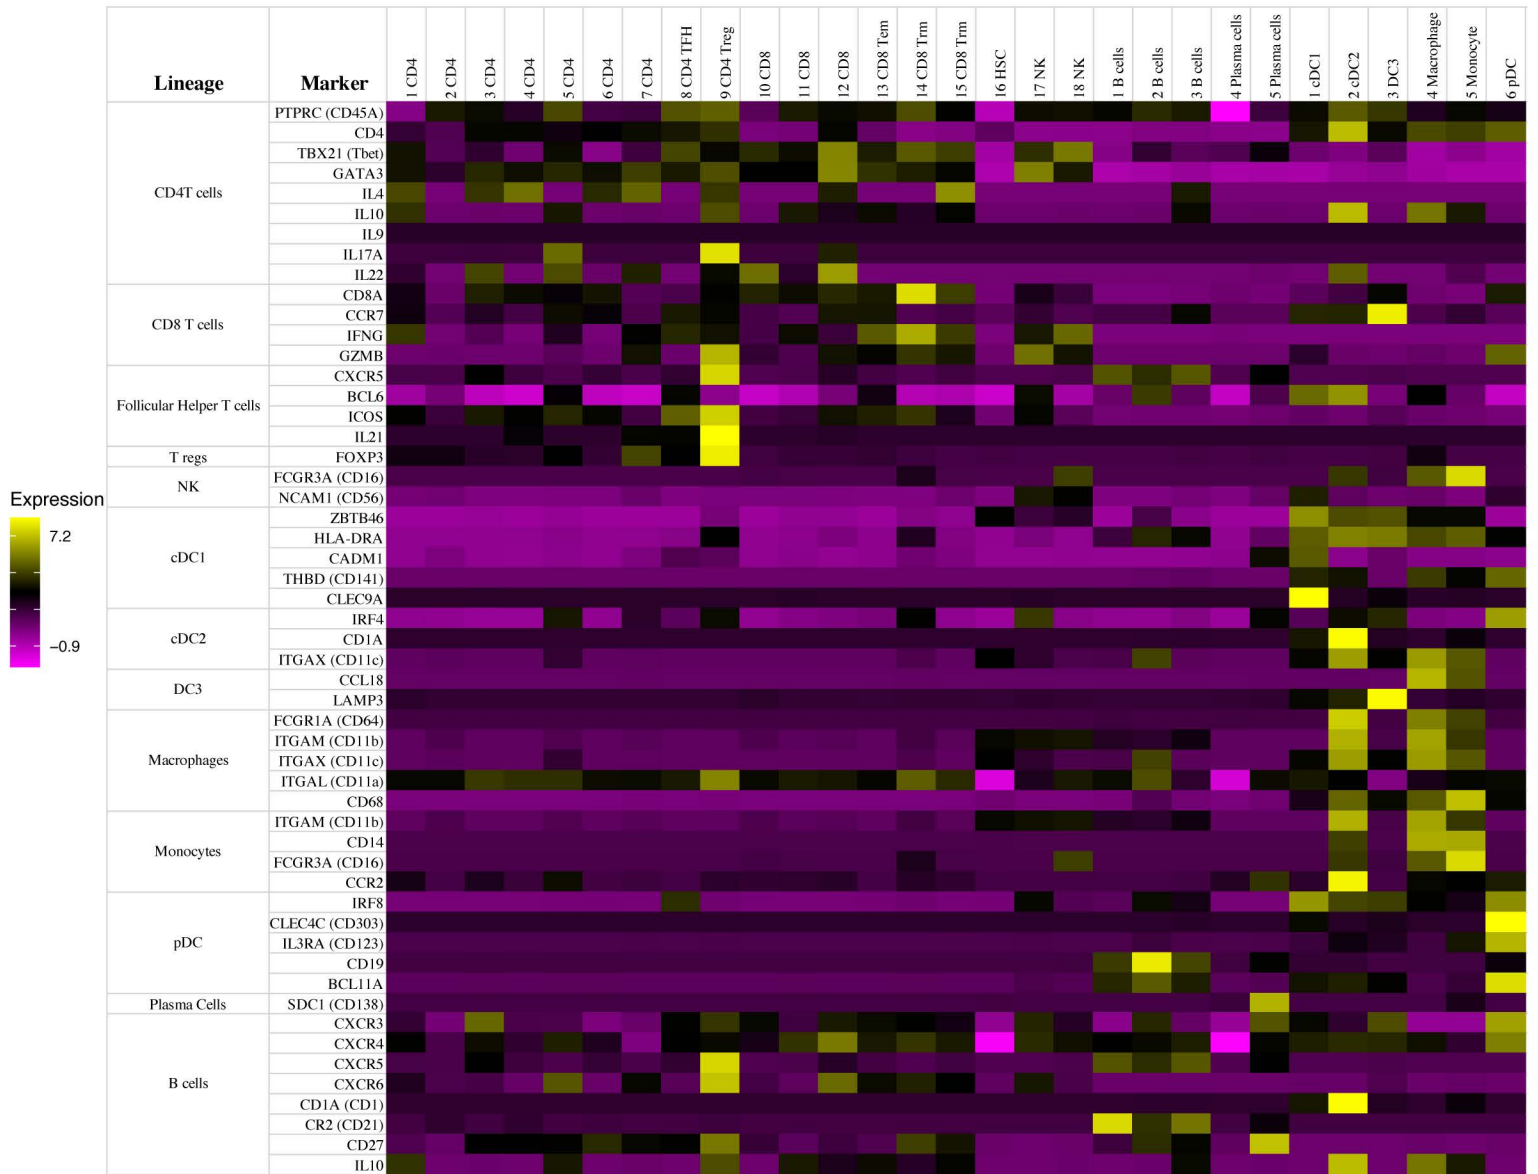

**Supplemental Figure 5.** Heatmap showing the expression of immune cell lineage markers across the identified immune cell populations (known markers on left Y axis and measured gene expression in our dataset on X axis).

**A**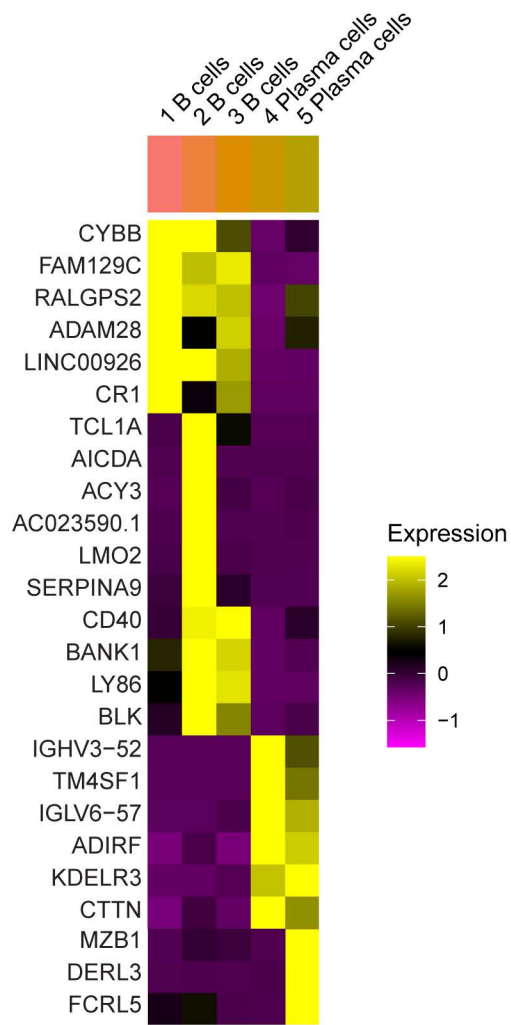**B**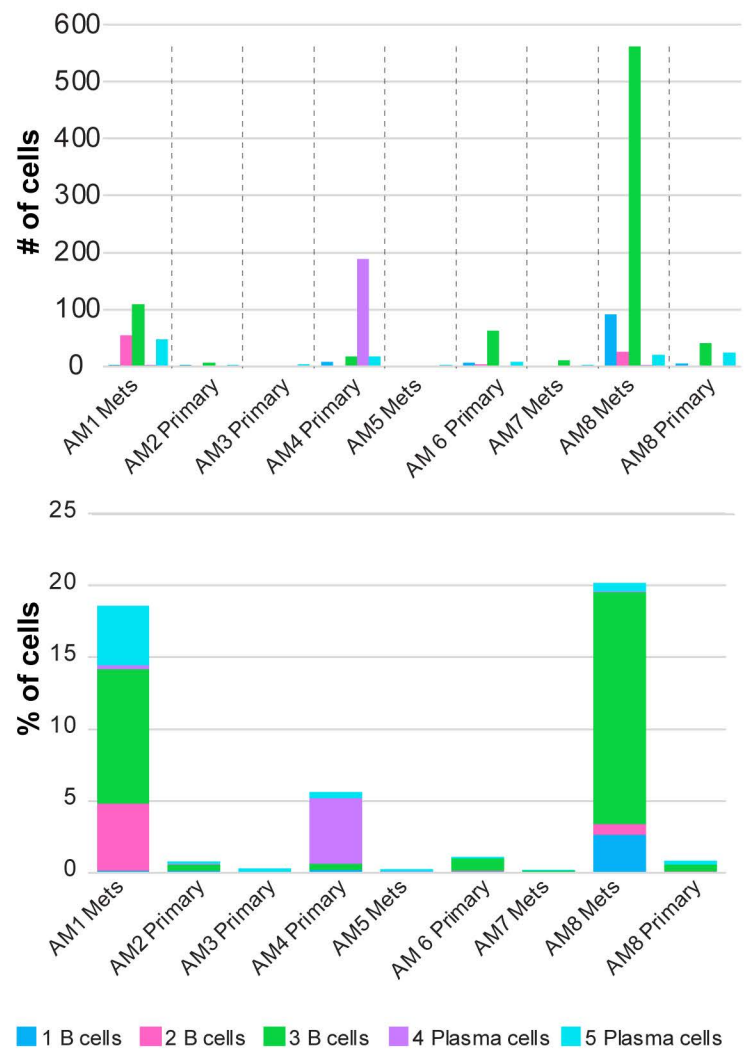

**Supplemental Figure 6. A.** Unsupervised clustering identifies 3 subsets of B cells and 2 clusters of plasma cells. **B.** Bar graphs showing the number (top) and percentage of each B cell and Plasma cell cluster by sample.
