# Supplementary material
Source: PubMed Central journal article supplement (PMC9106889)
Supplement: NIHMS1788166-supplement-3.pdf [file NIHMS1788166-supplement-3.pdf]

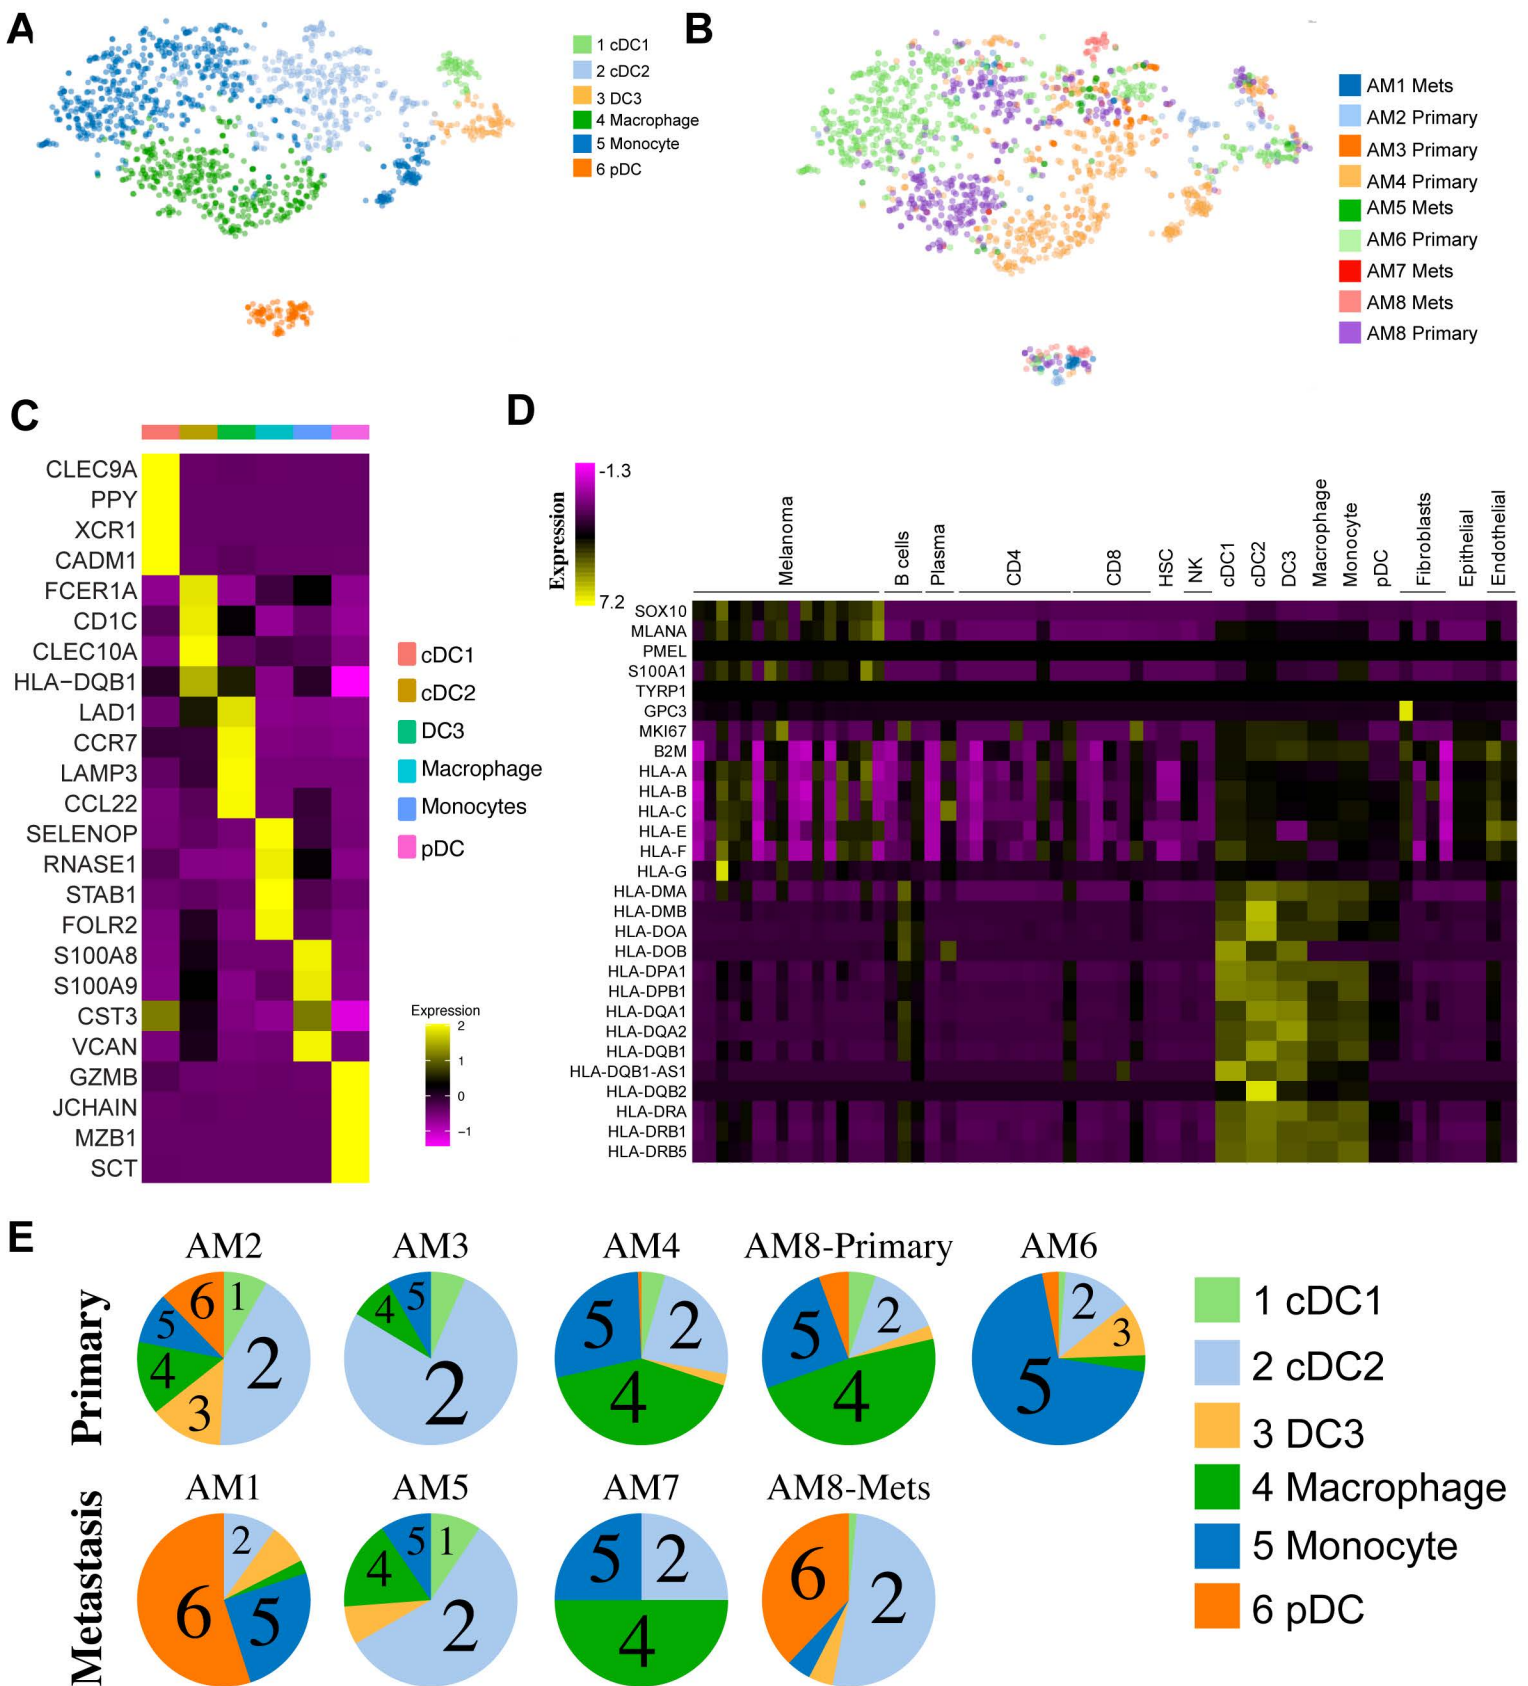

**Supplemental Figure 7.** The myeloid cell landscape of acral melanoma. A, t-SNE analysis showing distribution of myeloid cell clusters across all samples. B, t-SNE analysis showing distribution of myeloid cells based on sample of origin. C, Unsupervised clustering identified the 6 major myeloid cell clusters in samples from acral melanoma based on gene-expression profiles. D, Antigen and MHC expression among cell types in acral melanoma. E, Pie charts show proportions of myeloid cell clusters in each sample.
