# Supplementary material
Source: PubMed Central journal article supplement (PMC9106889)
Supplement: NIHMS1788166-supplement-4.pdf [file NIHMS1788166-supplement-4.pdf]

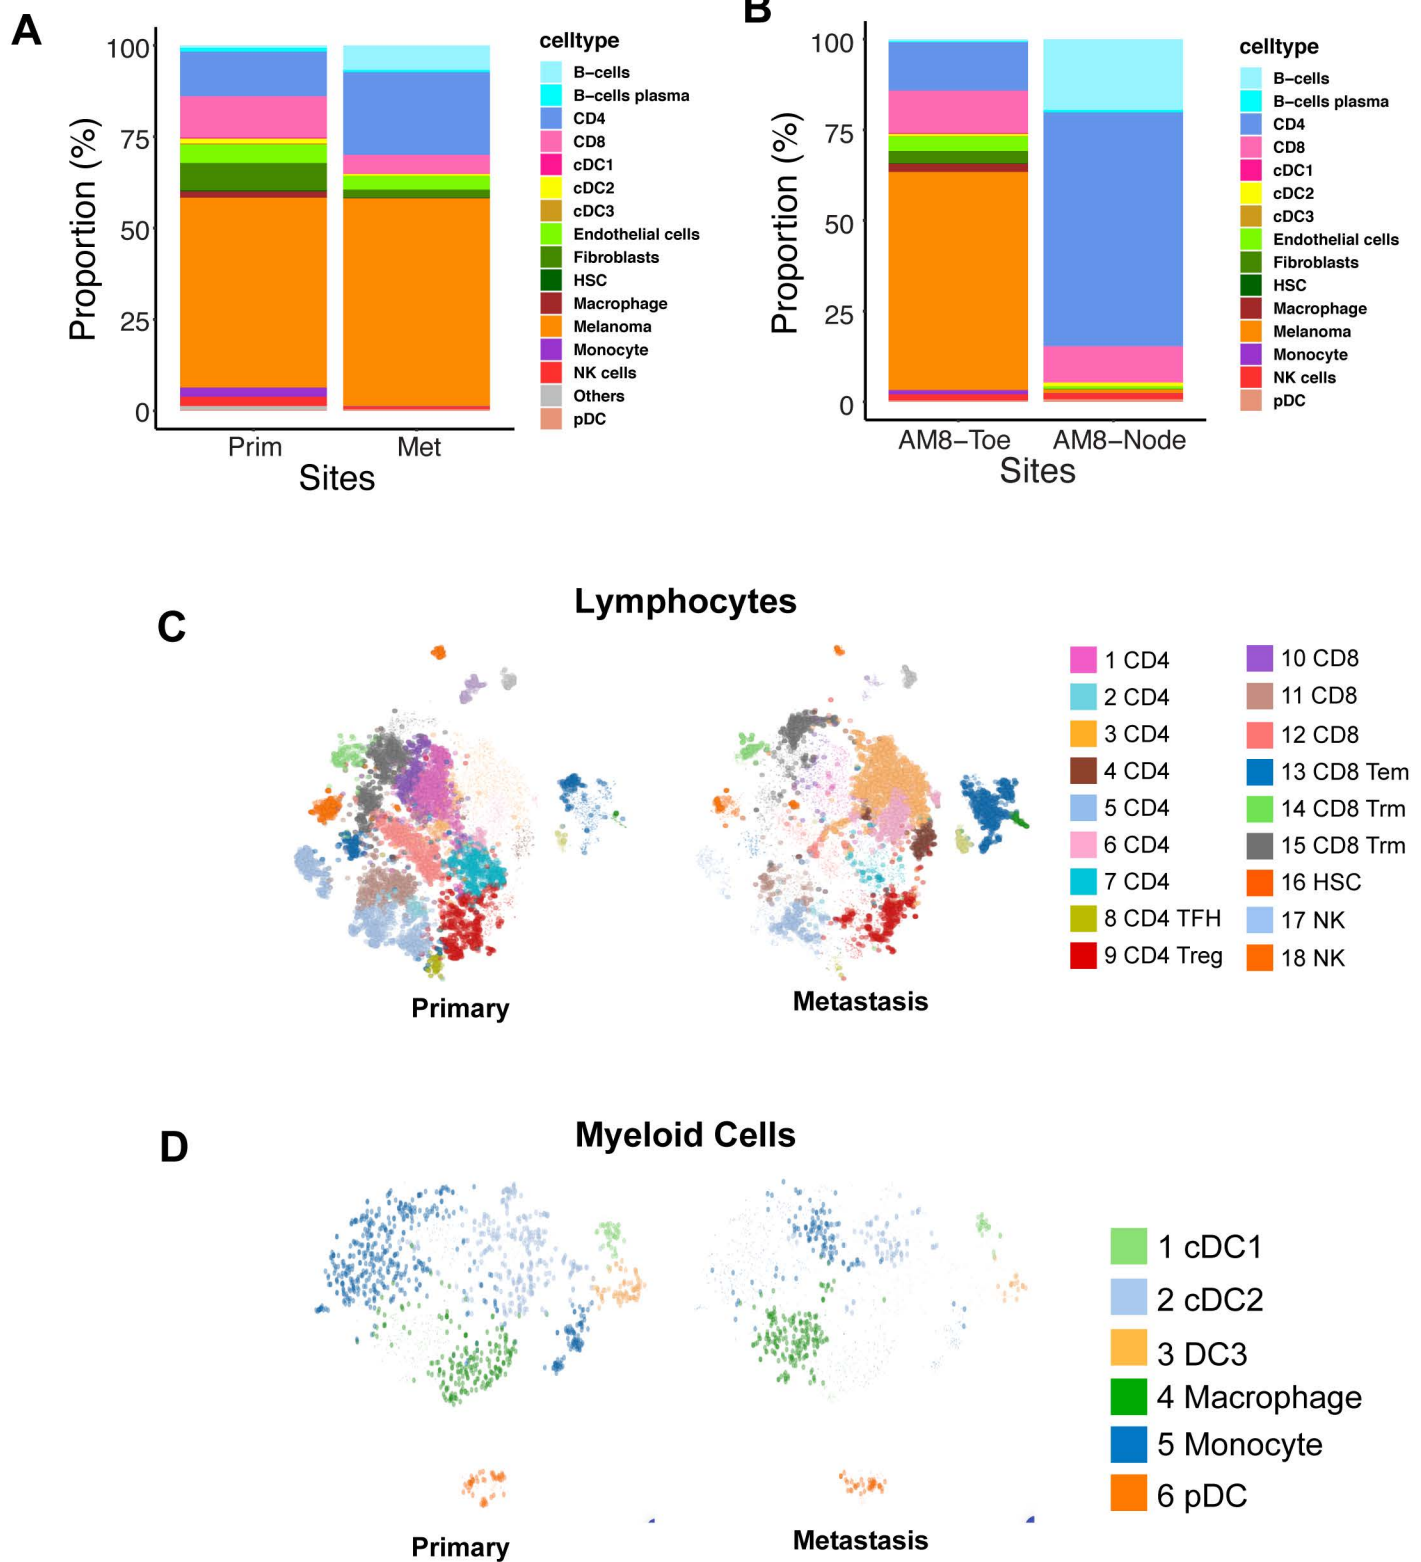

**Supplemental Figure 8. A.** Average proportions of the major cell types found at the primary and metastatic sites of acral melanoma. **B.** Proportions of the major cell types found at the patient-matched primary and metastatic site for acral melanoma patient AM8. **C.** tSNE plots showing lymphocyte landscapes between primary and metastatic sites of acral melanoma. **D.** tSNE plots showing myeloid cell landscapes between primary and metastatic sites of acral melanoma.

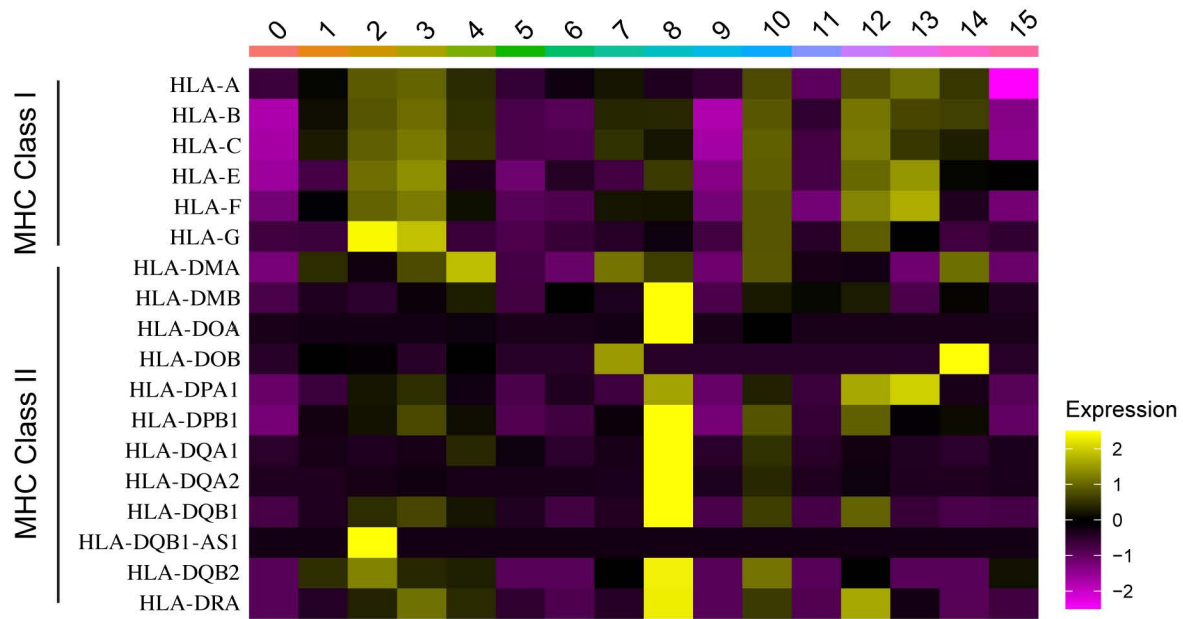

**Supplemental Figure 9.** Heatmap showing the expression of MHC class I and II genes in the individual clusters of tumor cells

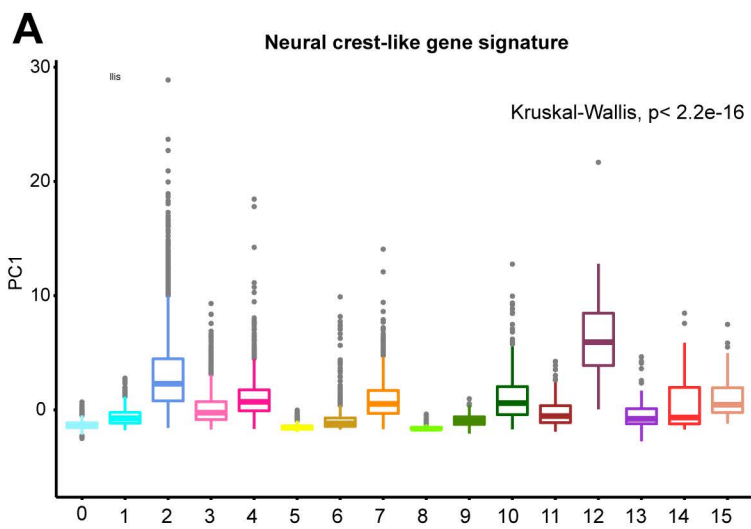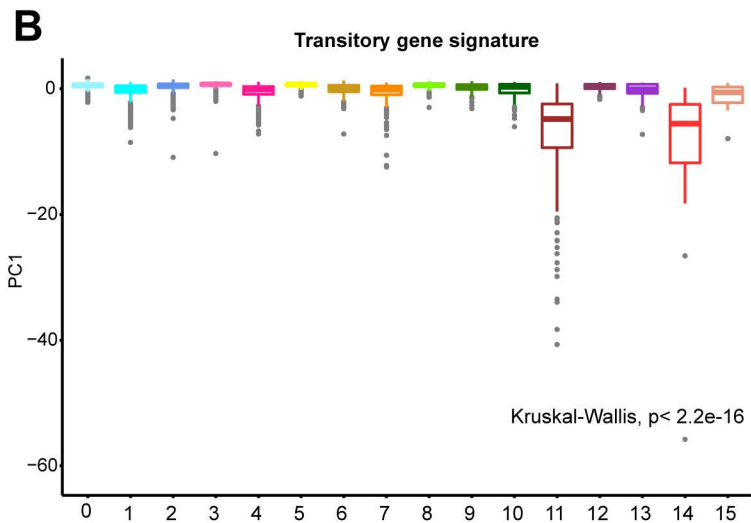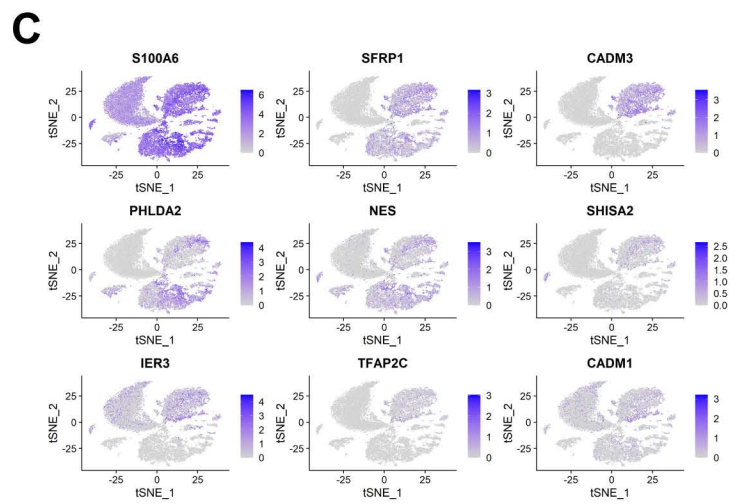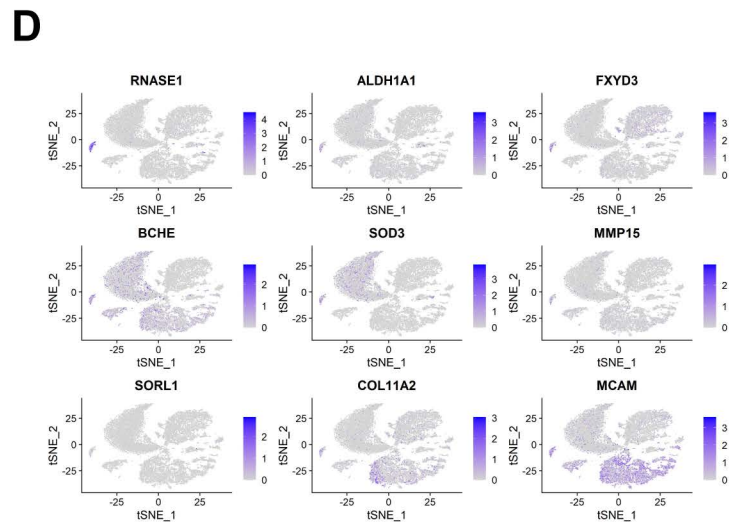

**Supplemental Figure 10. A.** Box plots summarizing the PC1 scores across 16 clusters of melanoma cells following PCA analysis for neural crest-like signatures previously identified (26). **B.** Box plots summarizing the PC1 scores across 16 clusters of melanoma cells following PCA analysis for transitory gene signatures previously identified (26). **C.** Expression of genes from neural crest-like signature in melanoma cells, visualized on the melanoma tSNE plots from Figure 4C. **D.** Expression of genes from transitory signature in melanoma cells, visualized on the melanoma tSNE plots from Figure 4C.

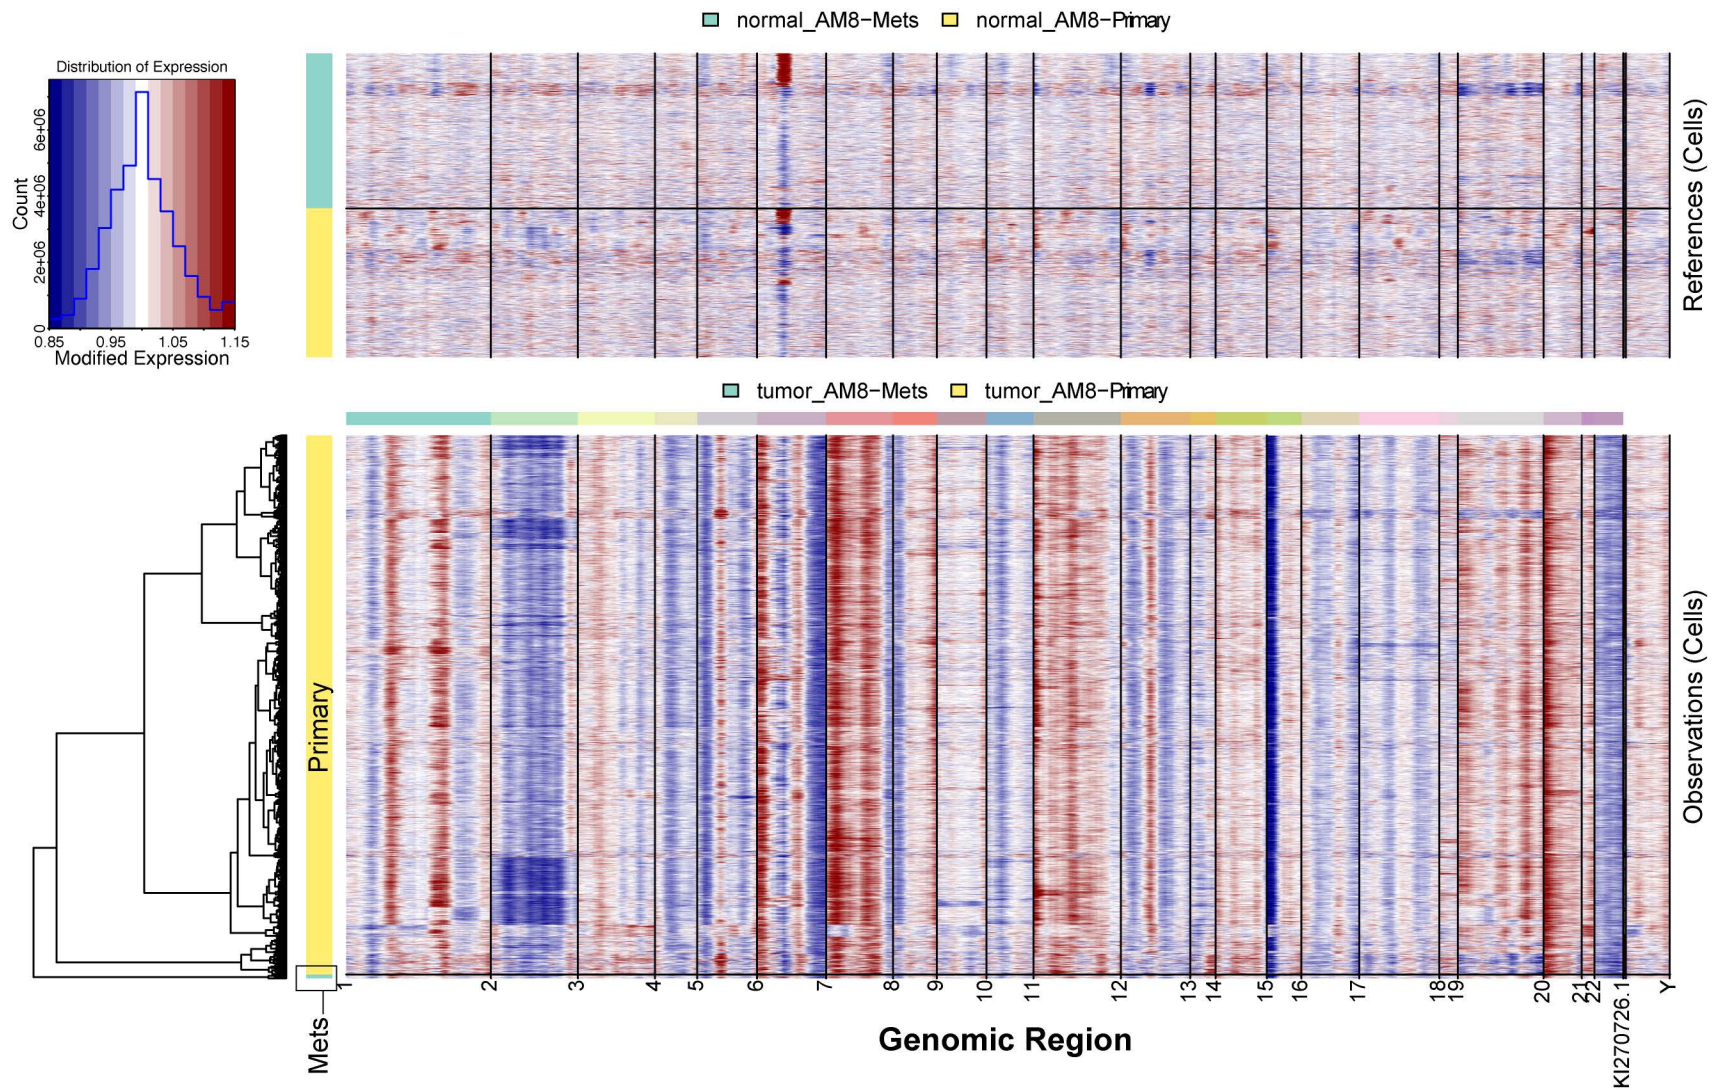

**Supplemental Figure 11.** Infer CNV analysis of acral samples AM8 primary and AM8 metastasis.
