# Supplementary material
Source: PubMed Central journal article supplement (PMC9106889)
Supplement: NIHMS1788166-supplement-5.pdf [file NIHMS1788166-supplement-5.pdf]

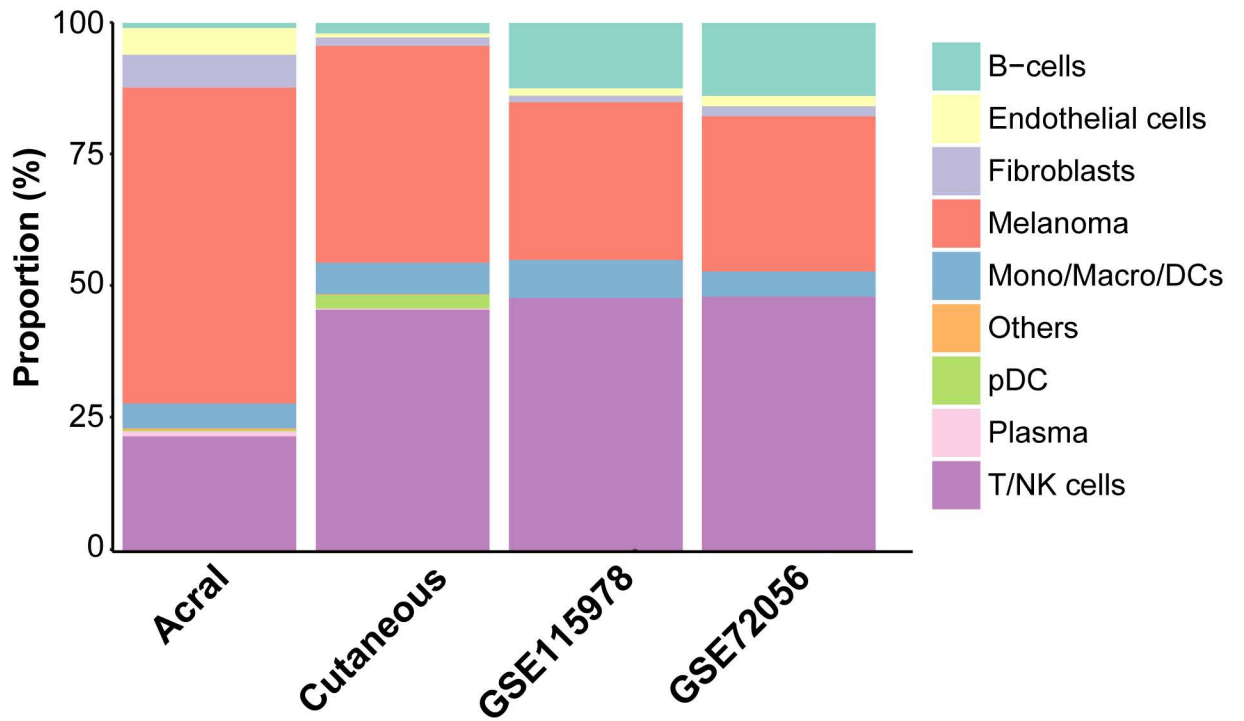

**Supplemental Figure 12.** The average proportion of the major cell subpopulations in acral and cutaneous melanoma sample cohorts from our datasets and two additional public datasets of cutaneous melanoma samples.

**Supplemental Figure 13.** Boxplots showing relative proportions of each cell type in acral and non-acral (cutaneous) melanoma samples.

b\_cells

Wilcoxon,  $p = 0.77$

Proportion of b\_cells

10

5

0

n=8

n=5

Acral

Cutaneous

Site

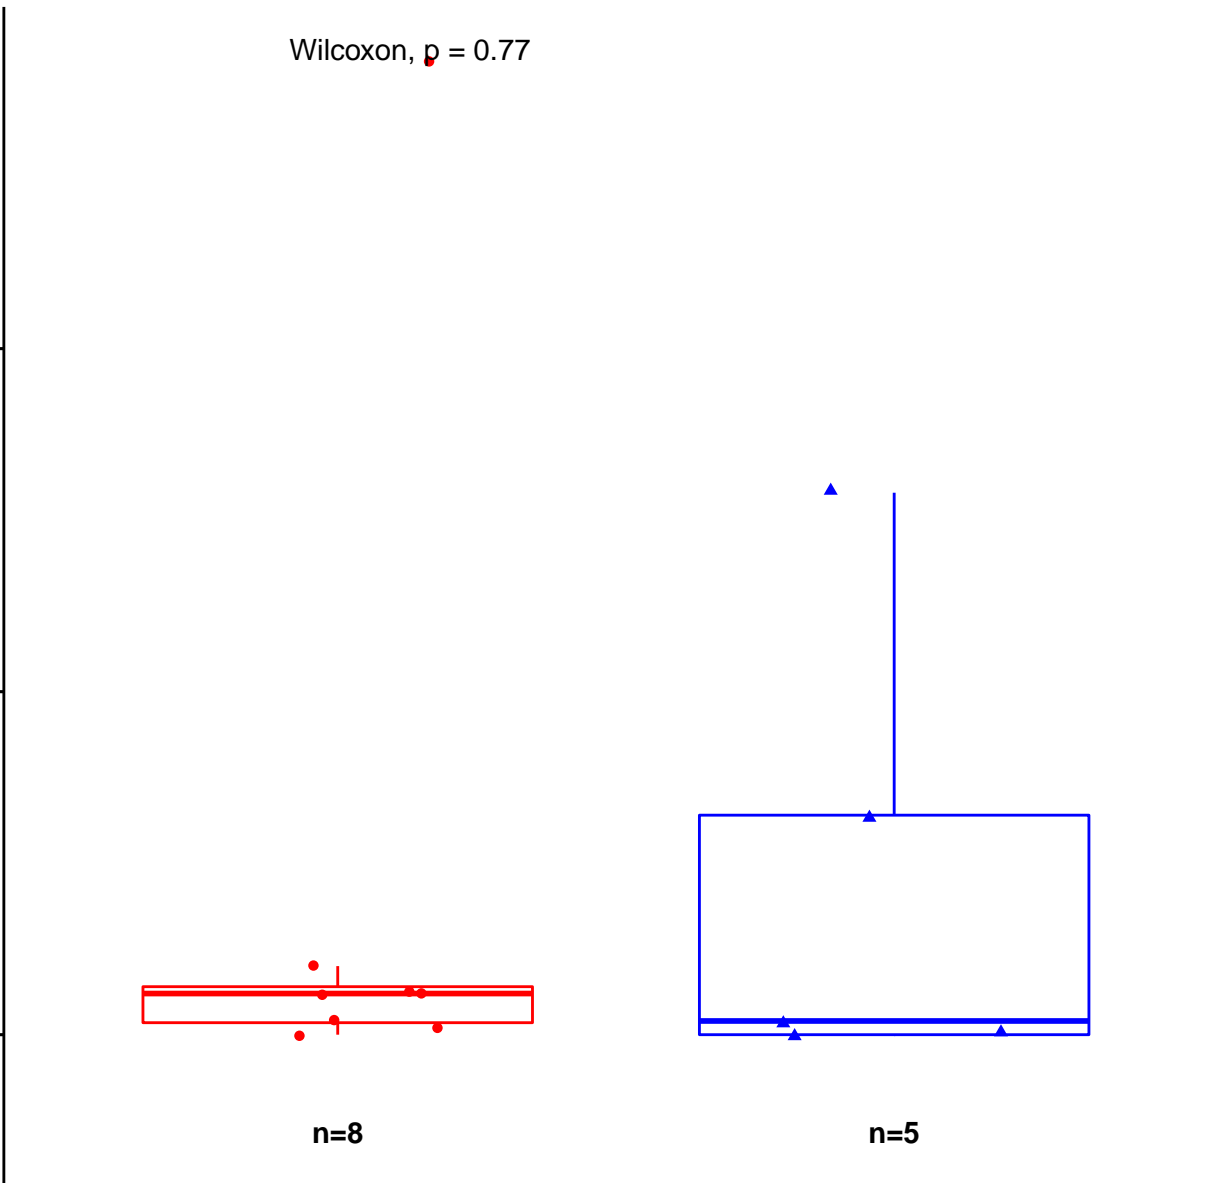

# endothelial\_cells

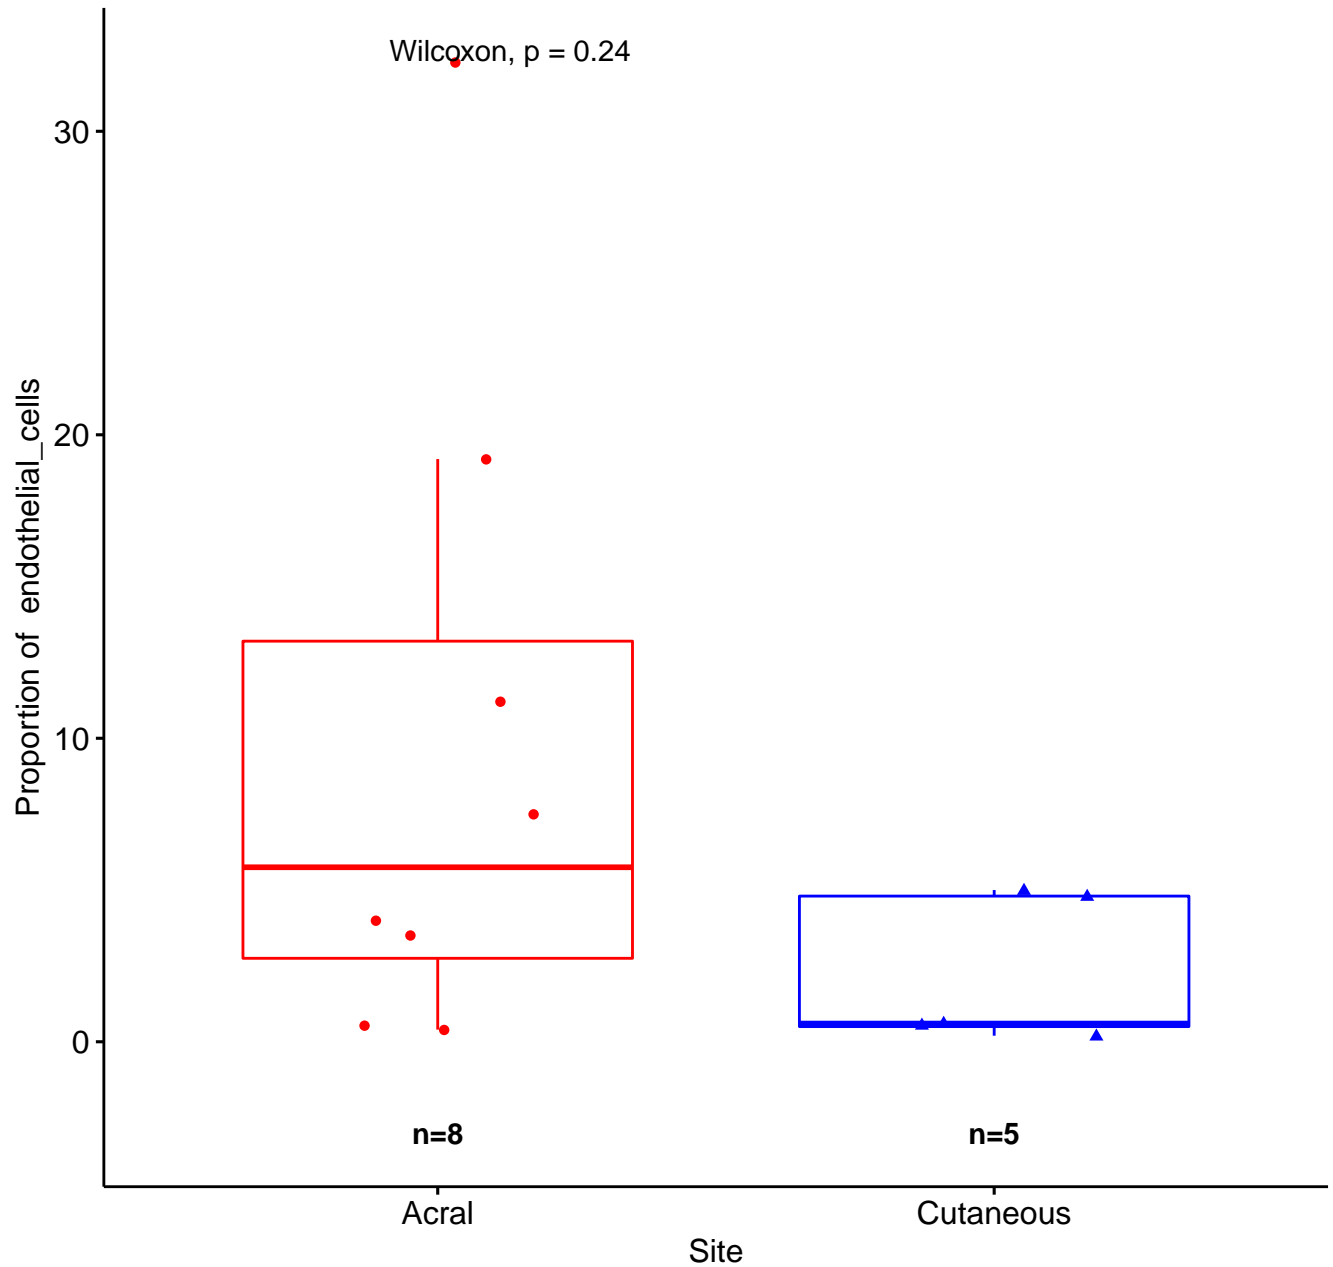

# fibroblasts

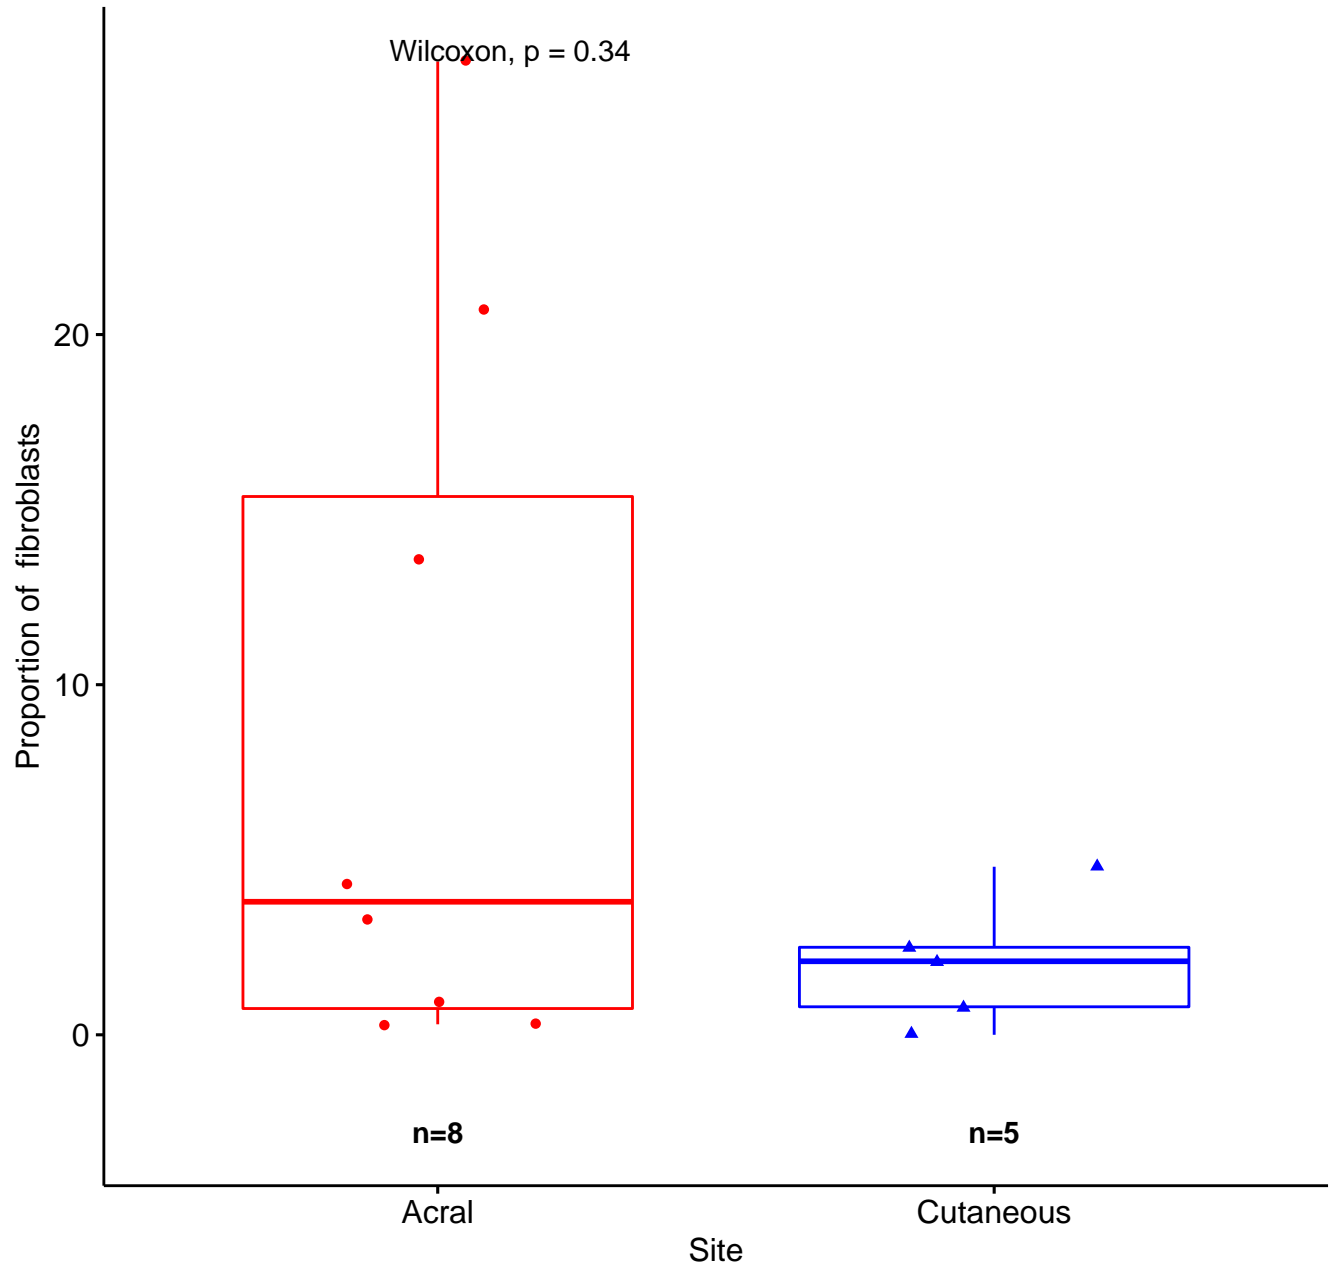

# melanocytes

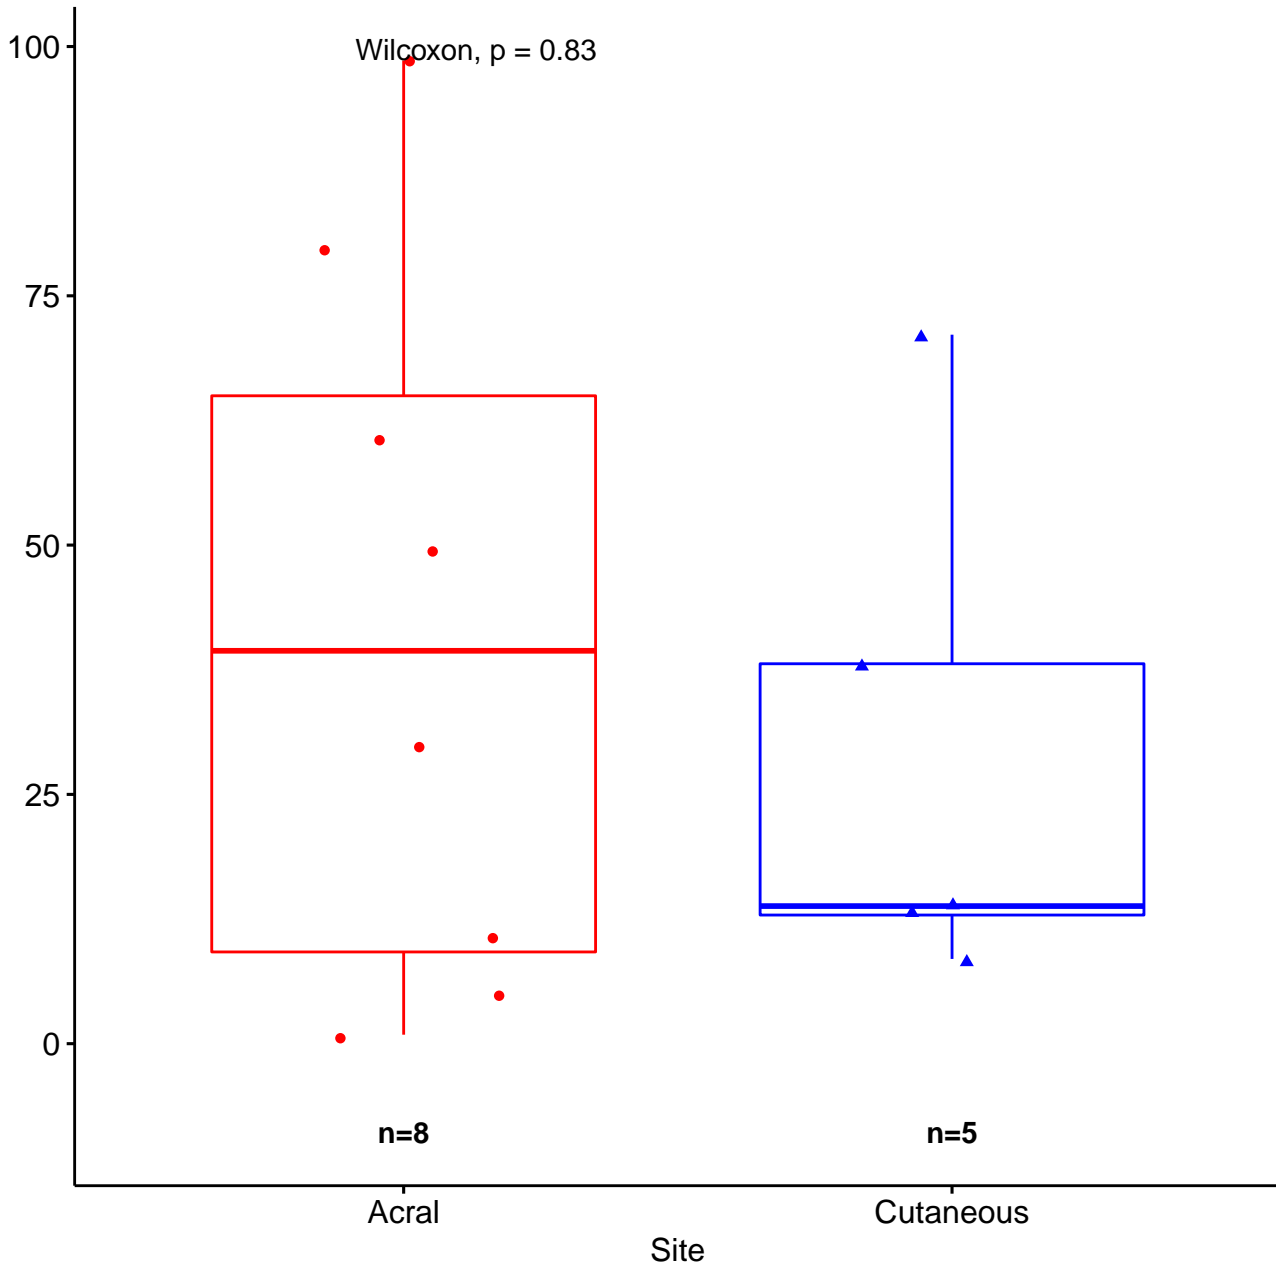

# monocytes\_macrophages\_d\_cs

Wilcoxon,  $p = 0.88$

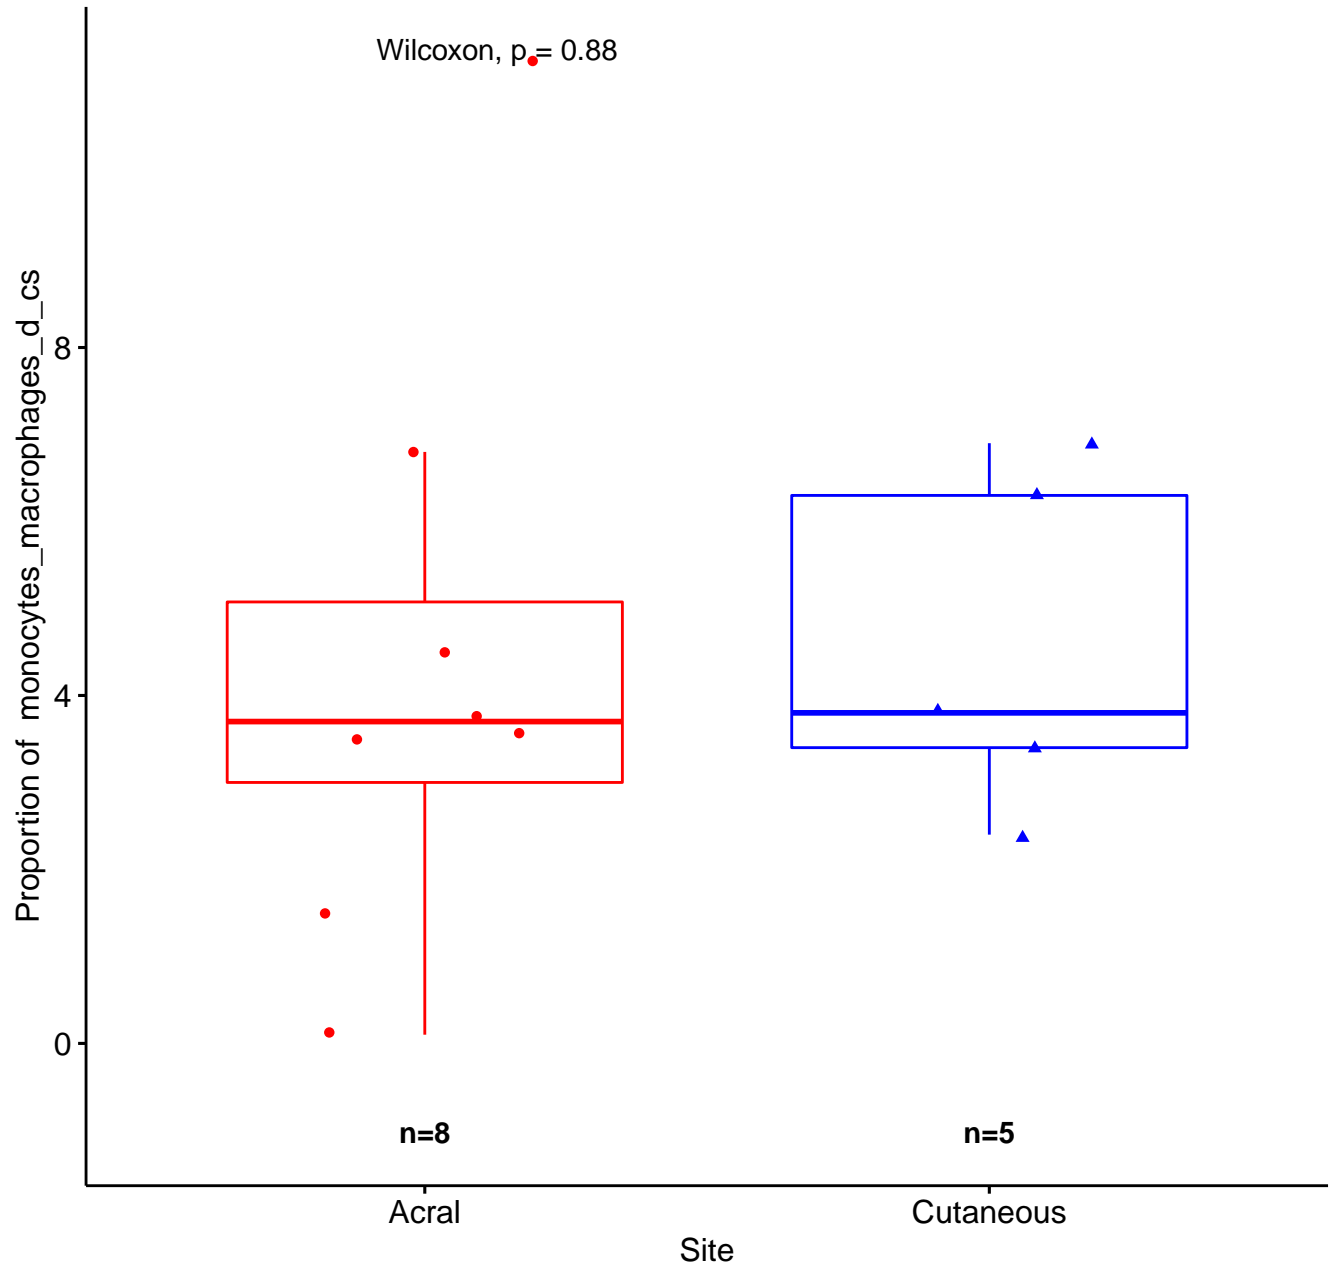

others

Wilcoxon,  $p = 0.94$

Proportion of others

1.25  
1.00  
0.75  
0.50  
0.25  
0.00

**n=8**

**n=5**

Acral

Cutaneous

Site

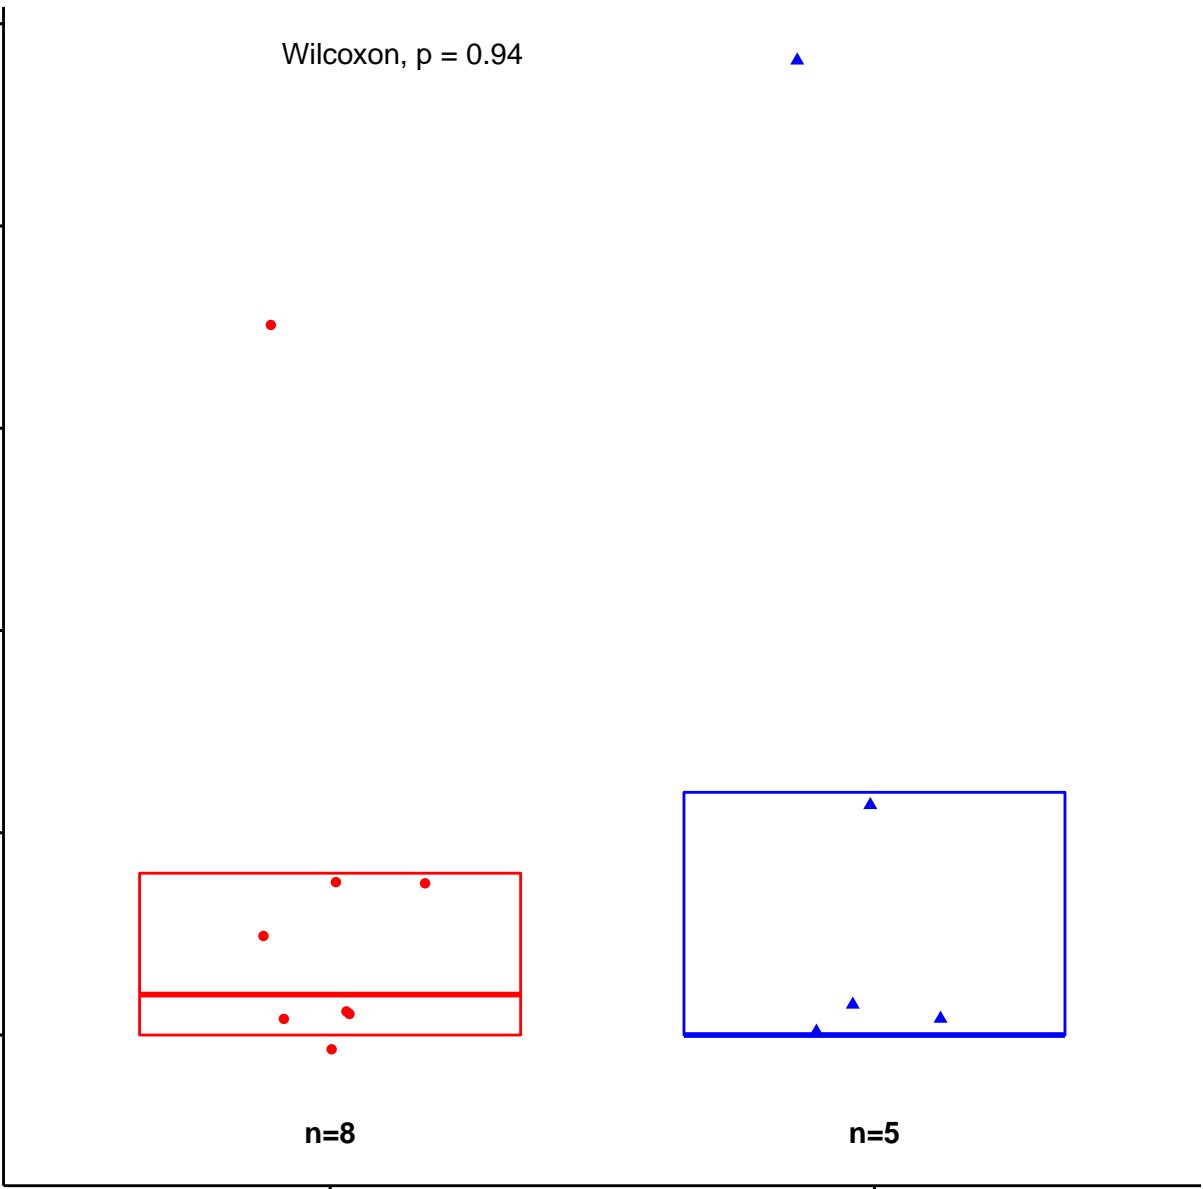



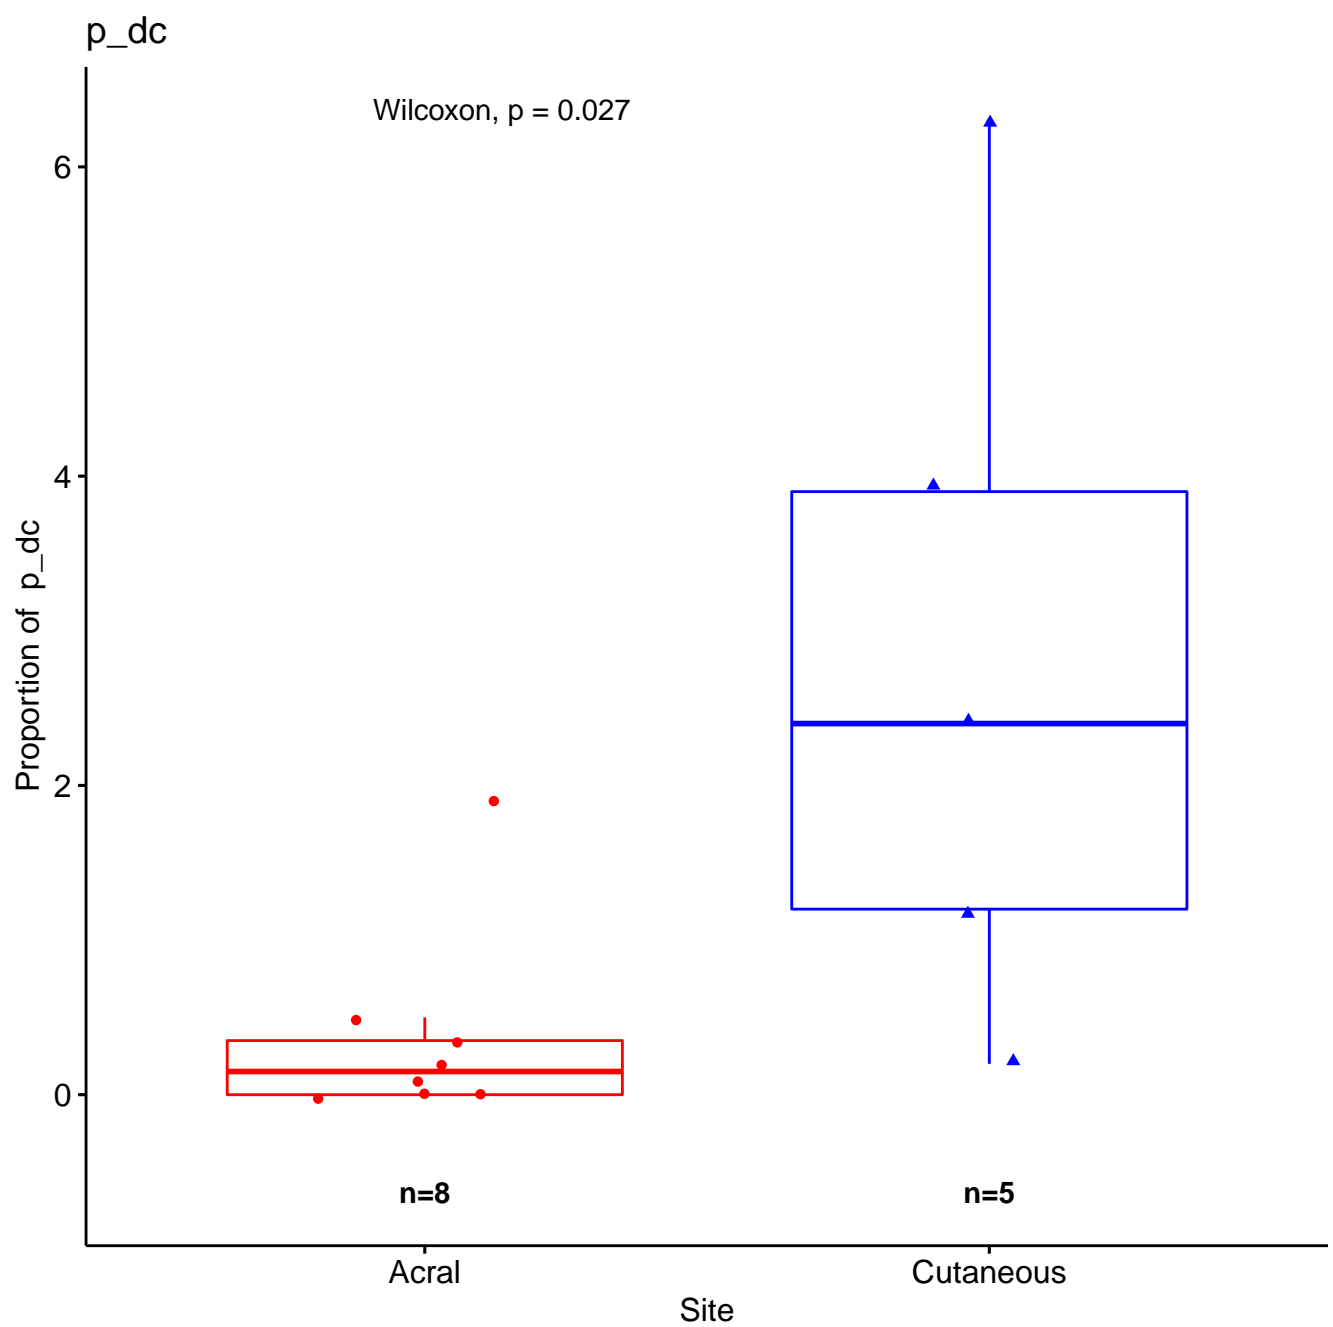

plasma

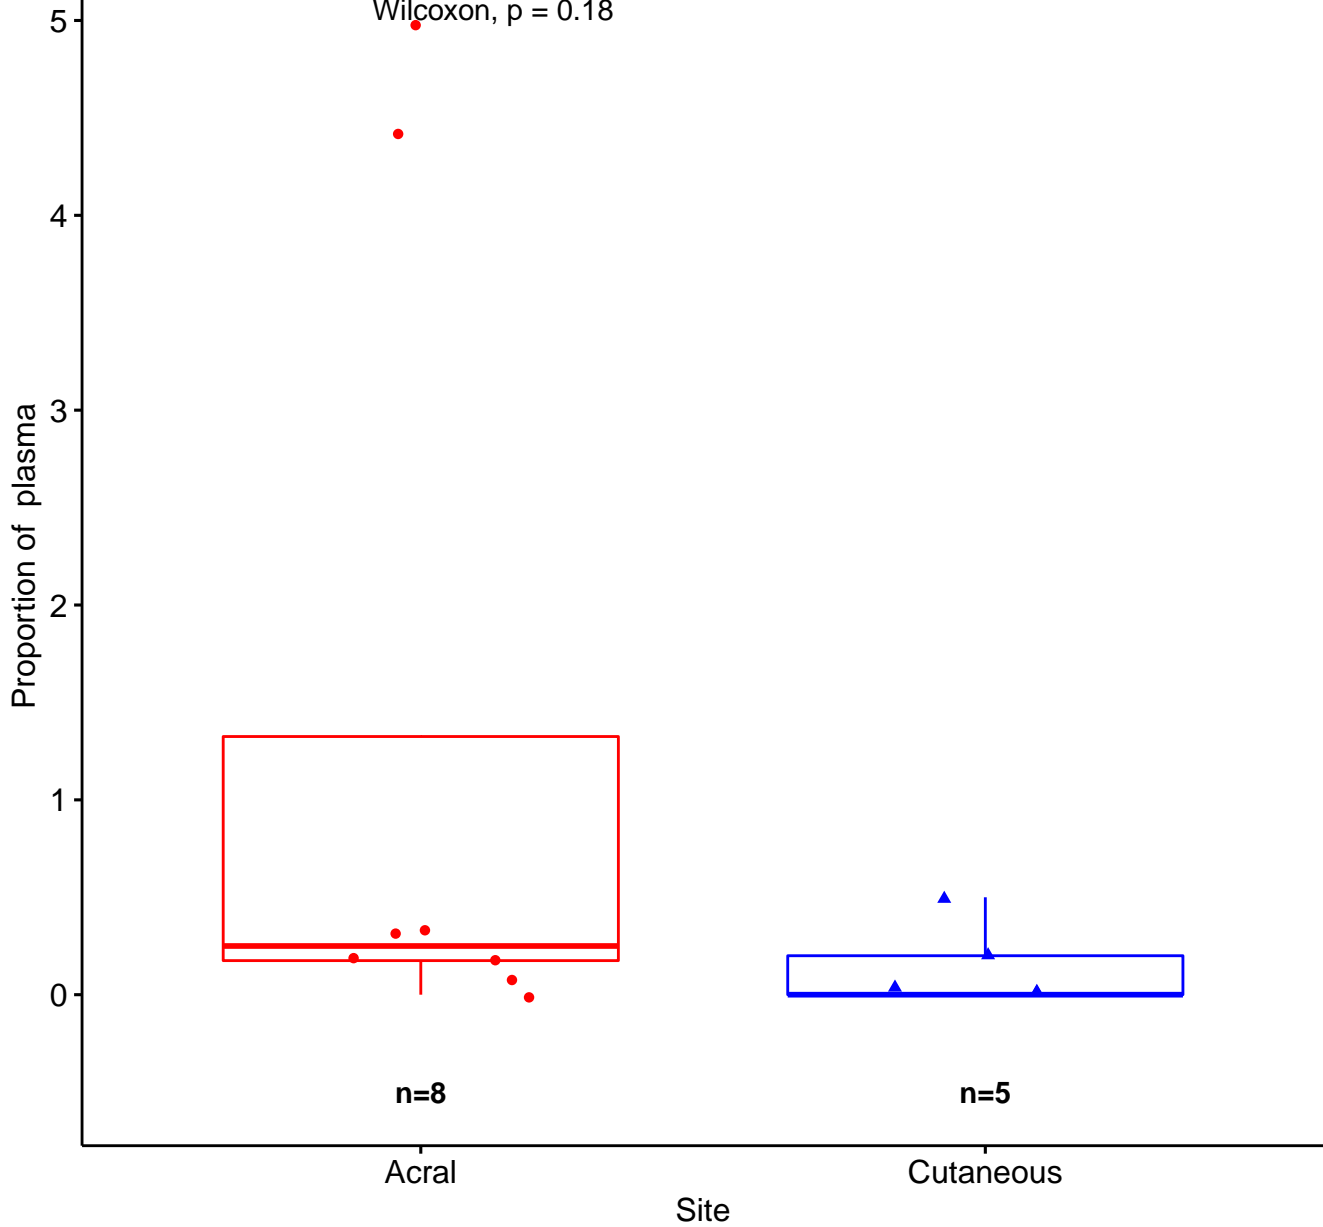

t\_nk\_cells

Wilcoxon,  $p = 0.065$

Proportion of t\_nk\_cells

60

40

20

0

n=8

n=5

Acral

Cutaneous

Site

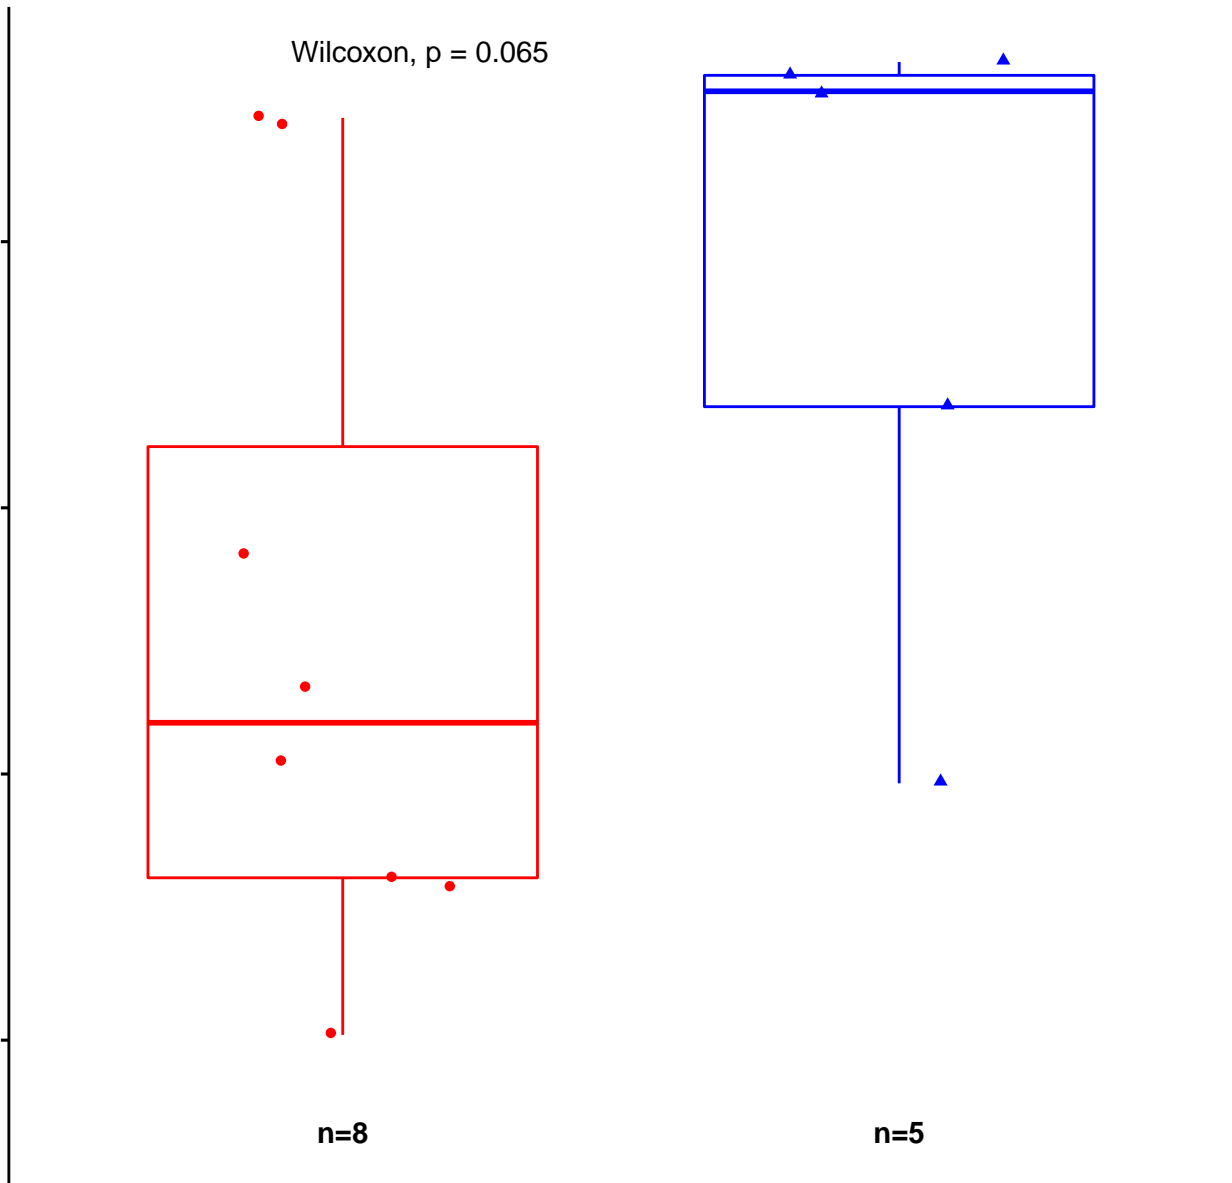

cd4

50  
40  
30  
20  
10  
0

Proportion of cd4

Wilcoxon,  $p = 0.28$

n=8

n=5

Acral

Cutaneous

Site

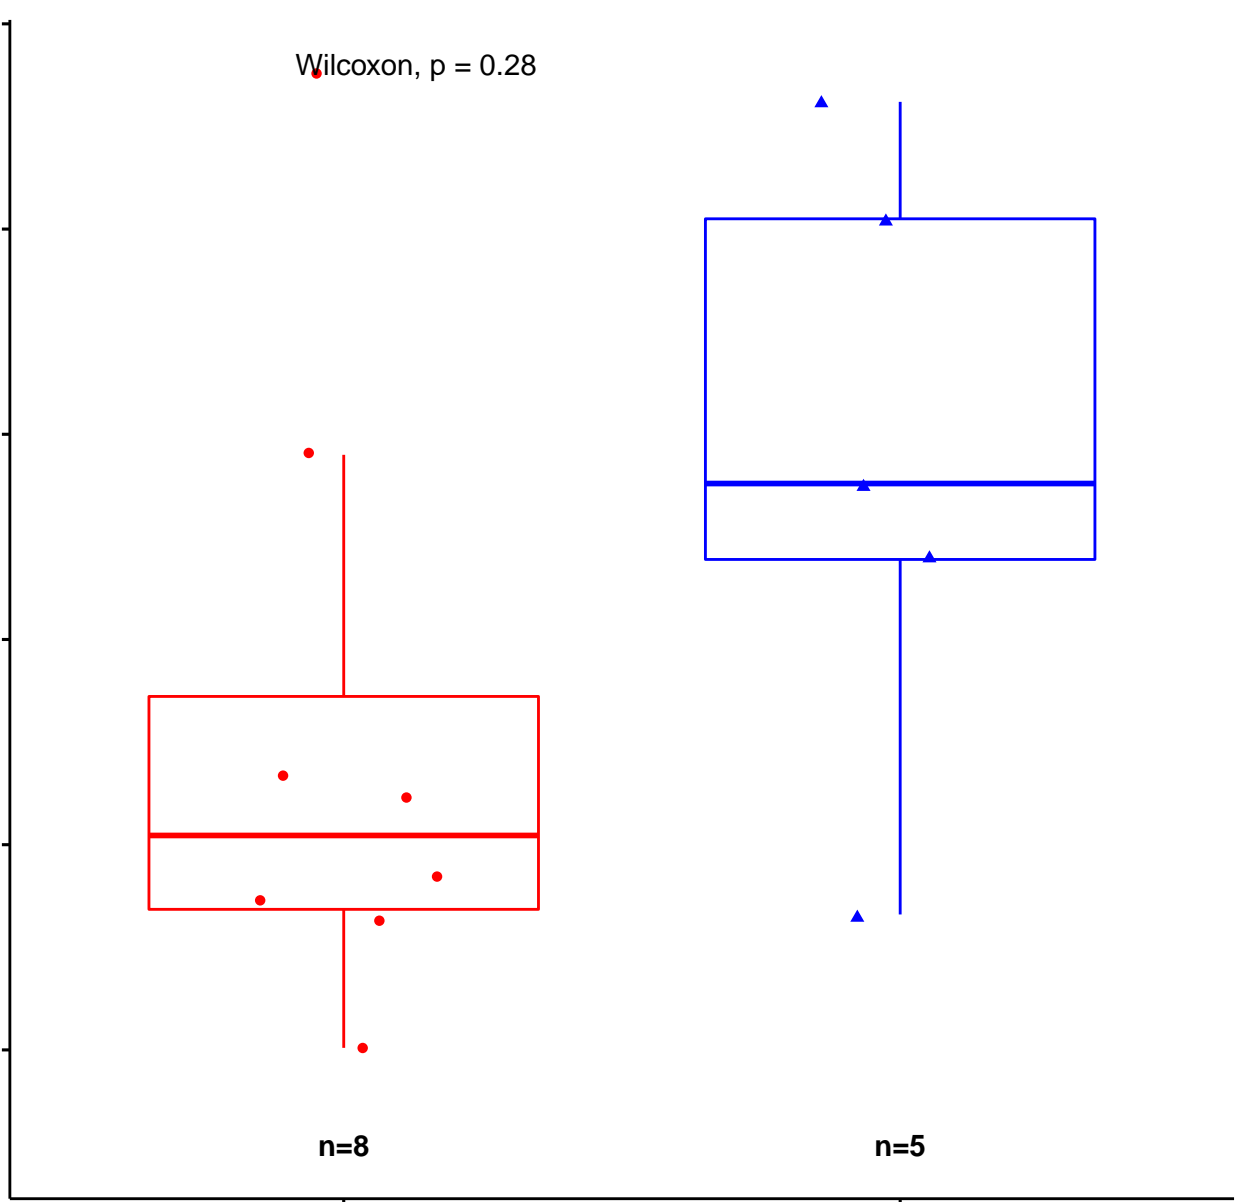

cd8

Wilcoxon,  $p = 0.44$

40

30

20

10

0

Proportion of cd8

n=8

n=5

Acral

Cutaneous

Site

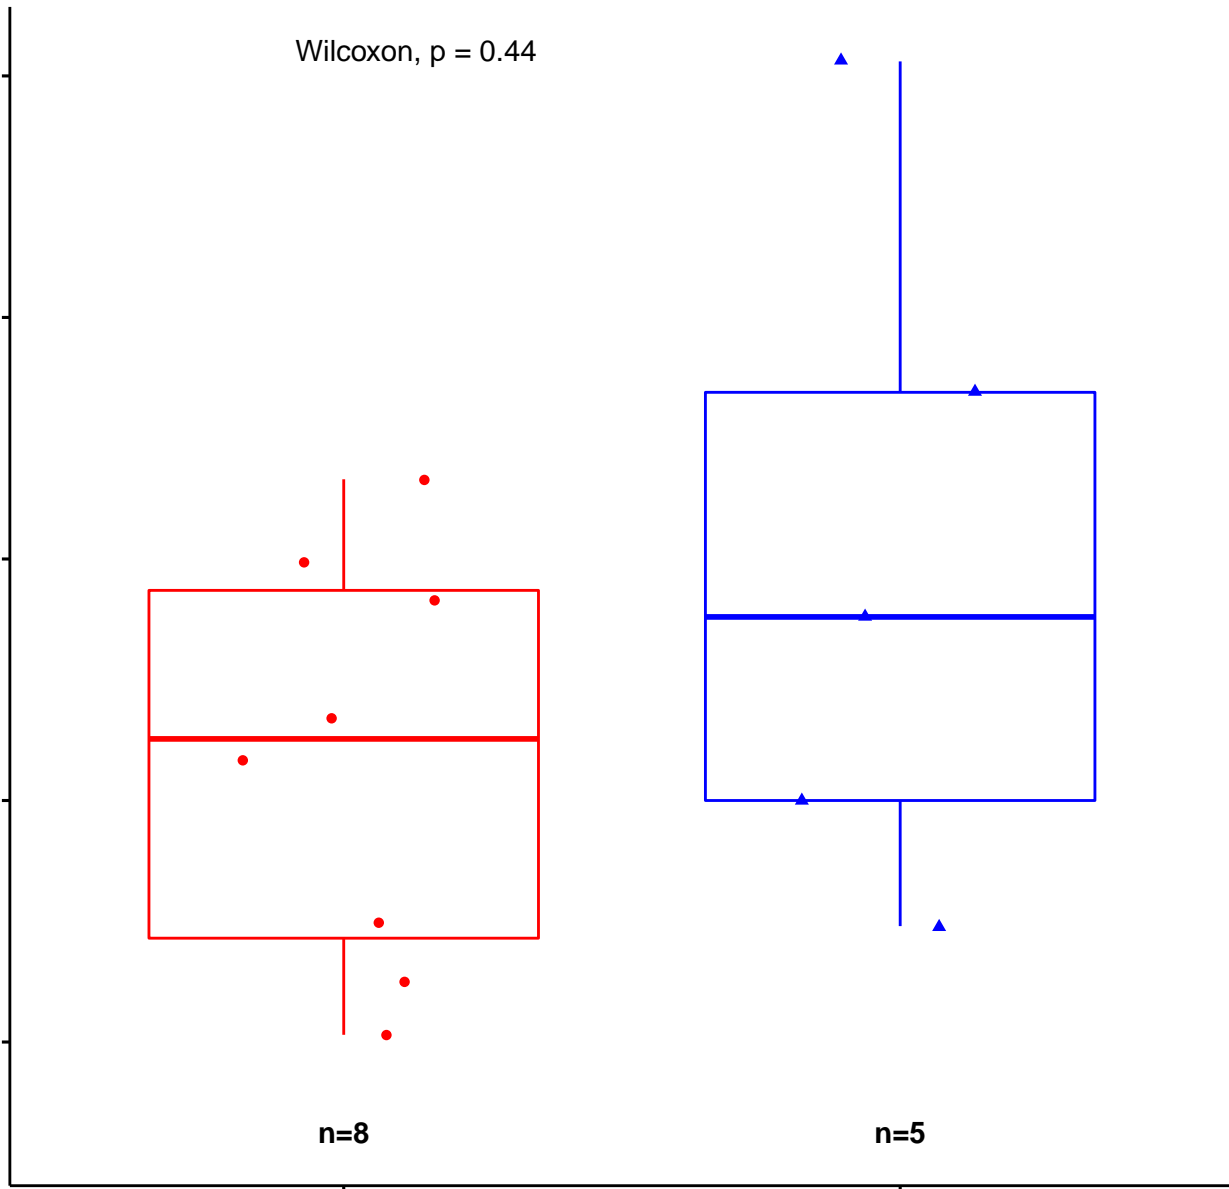

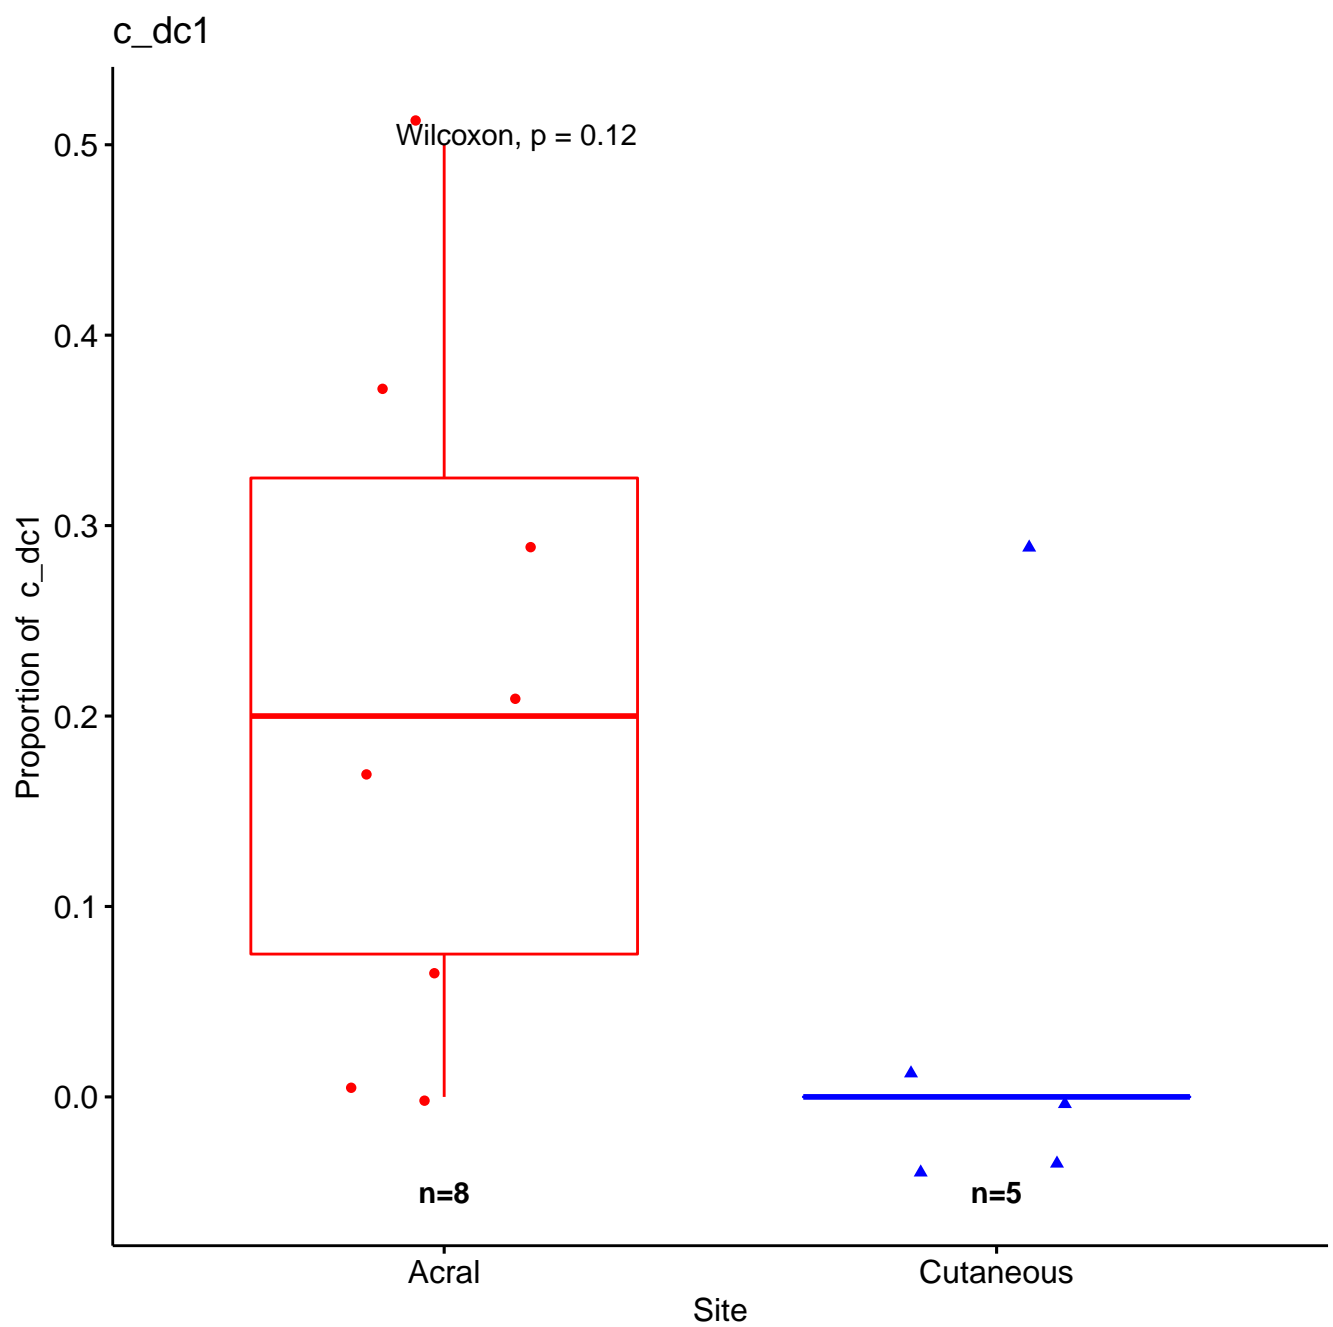

c\_dc2

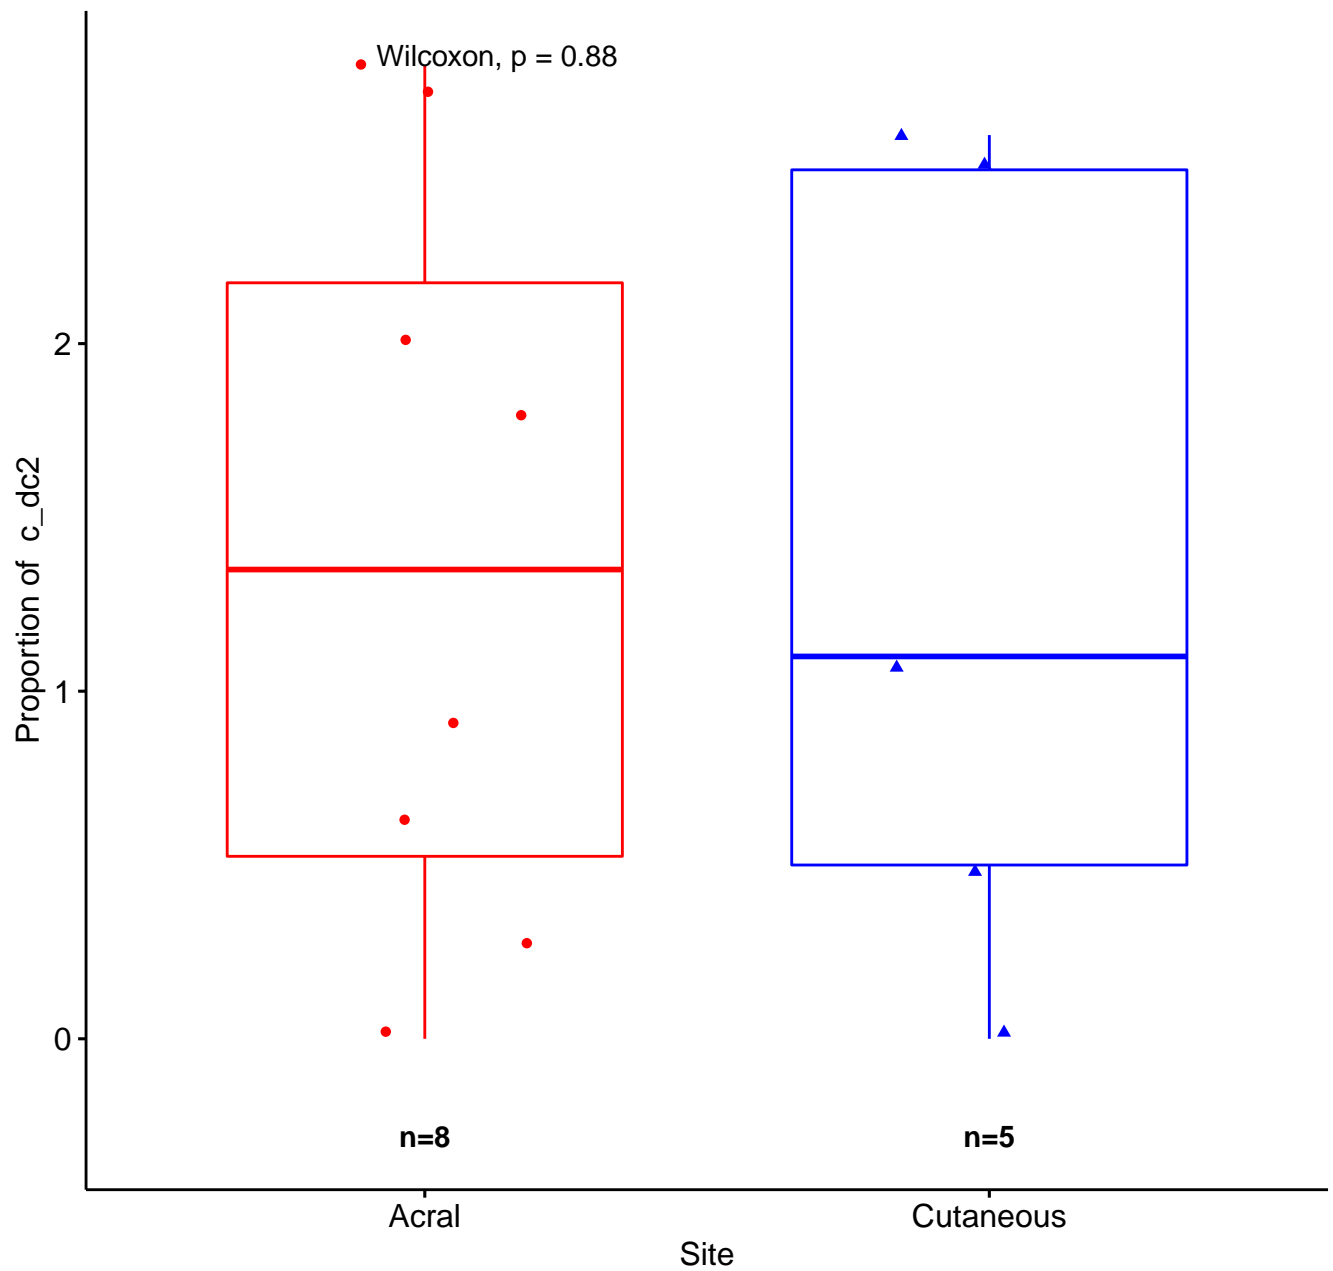

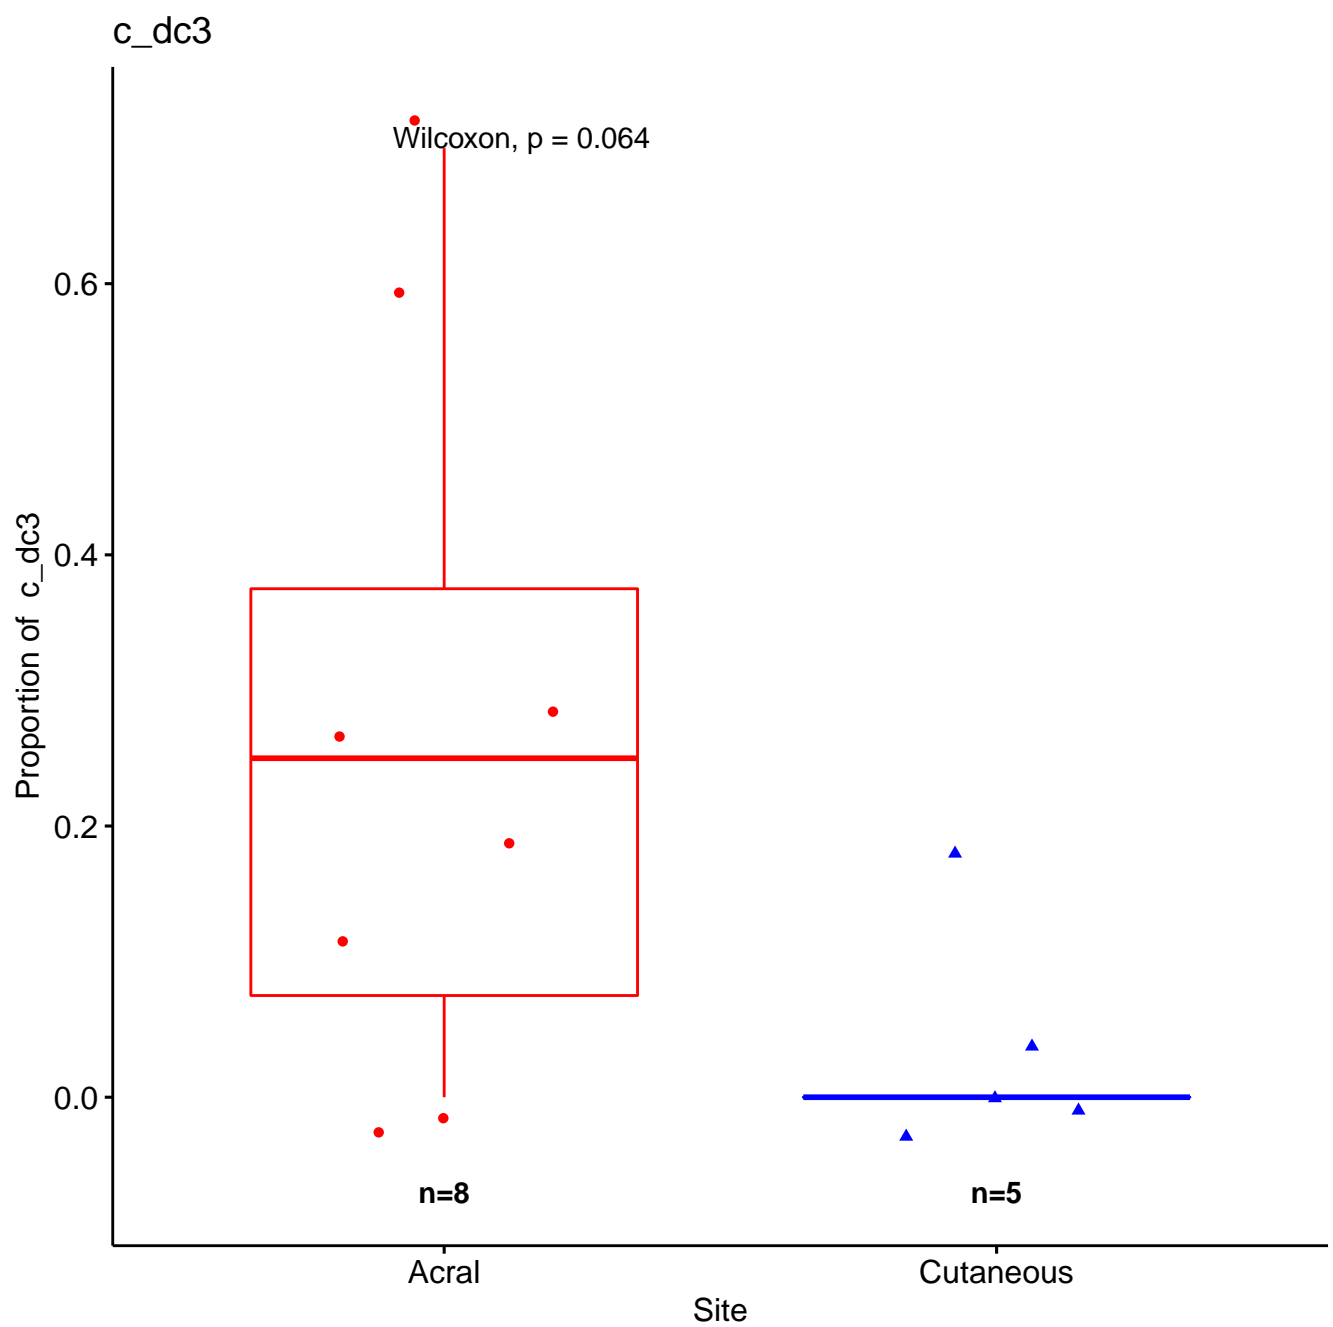



# macrophages

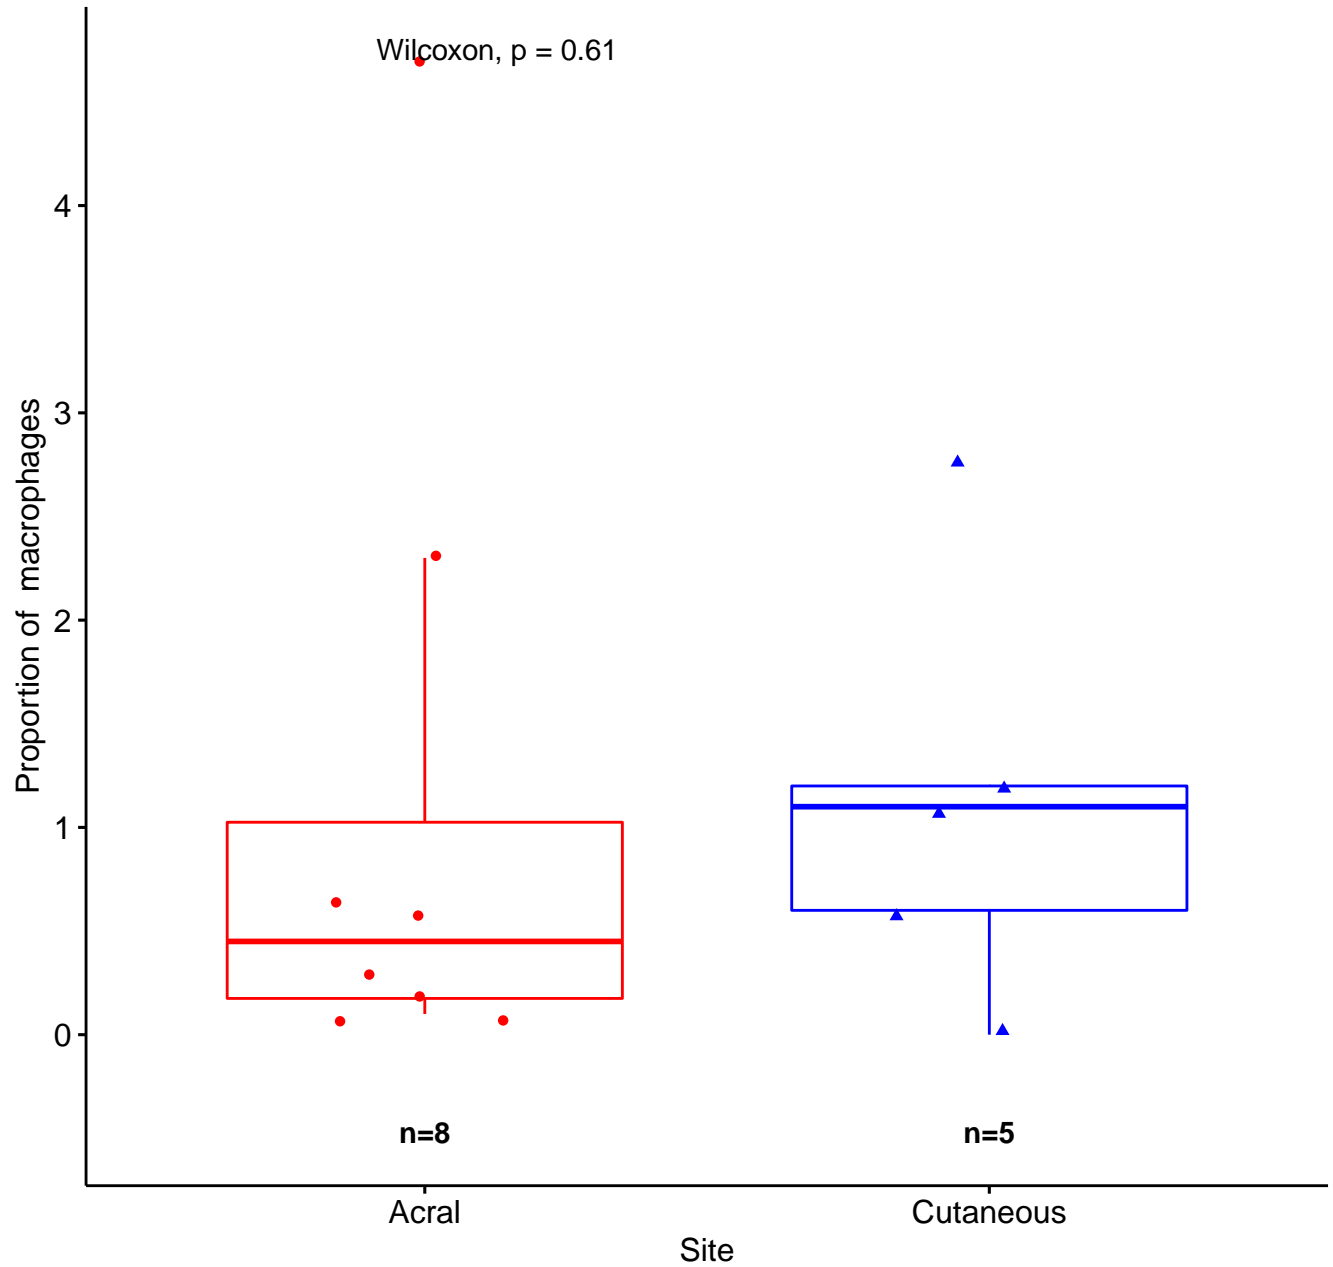

# monocytes

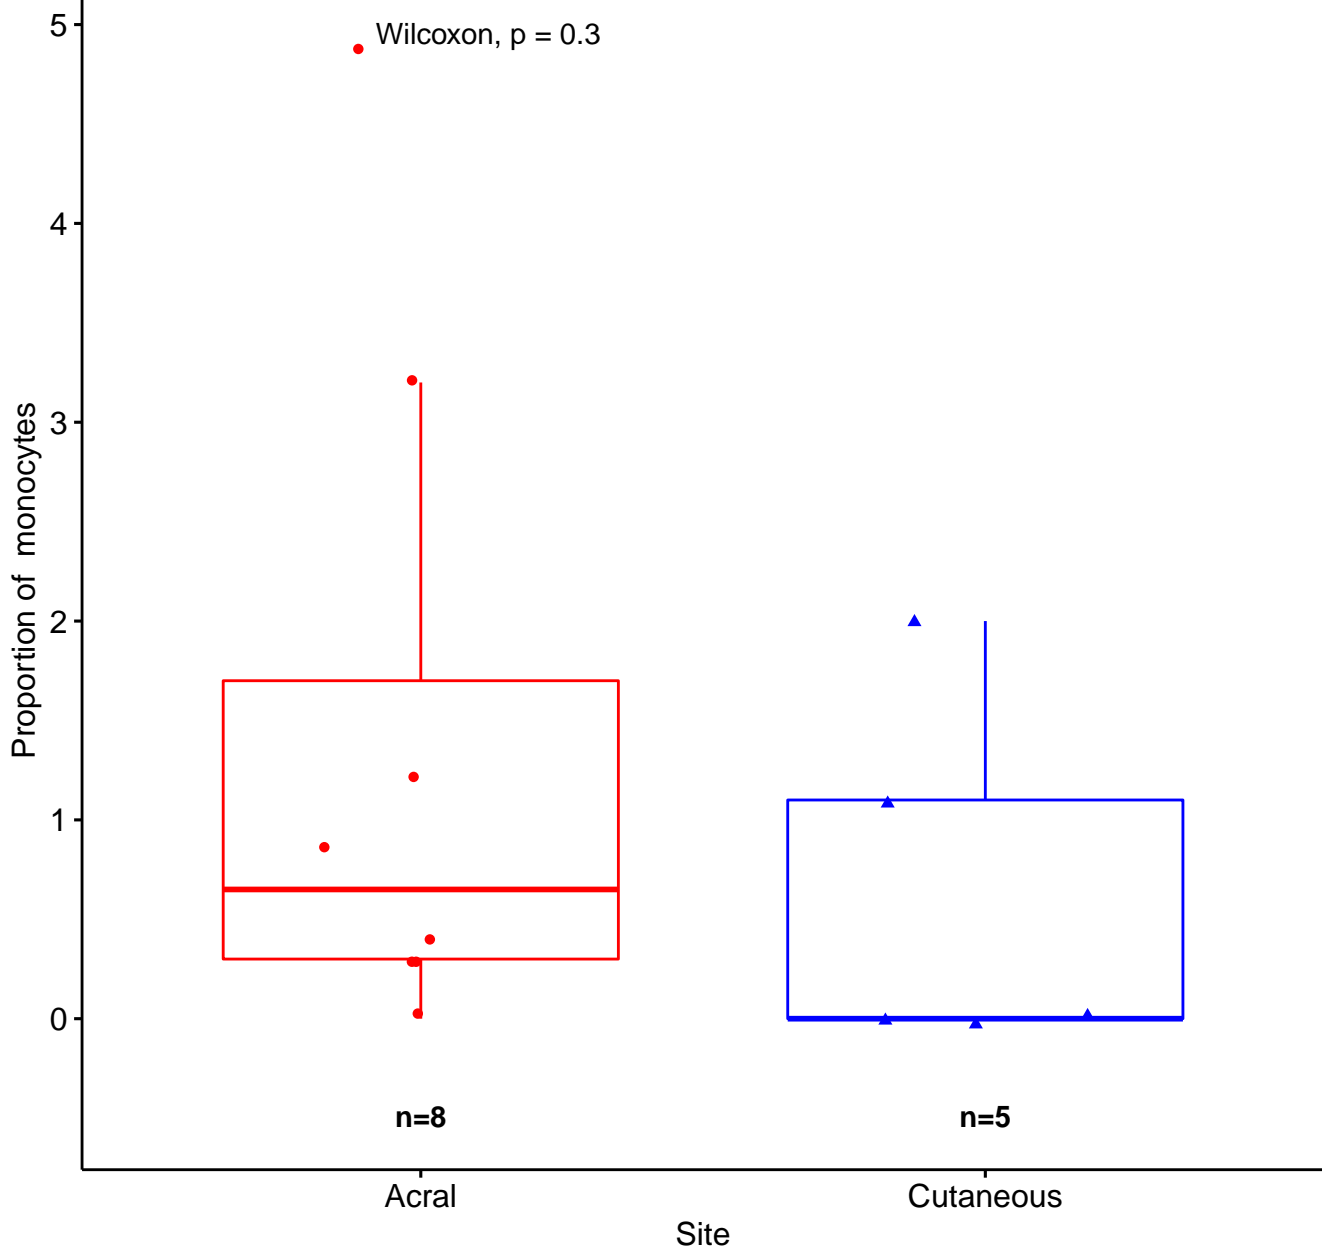

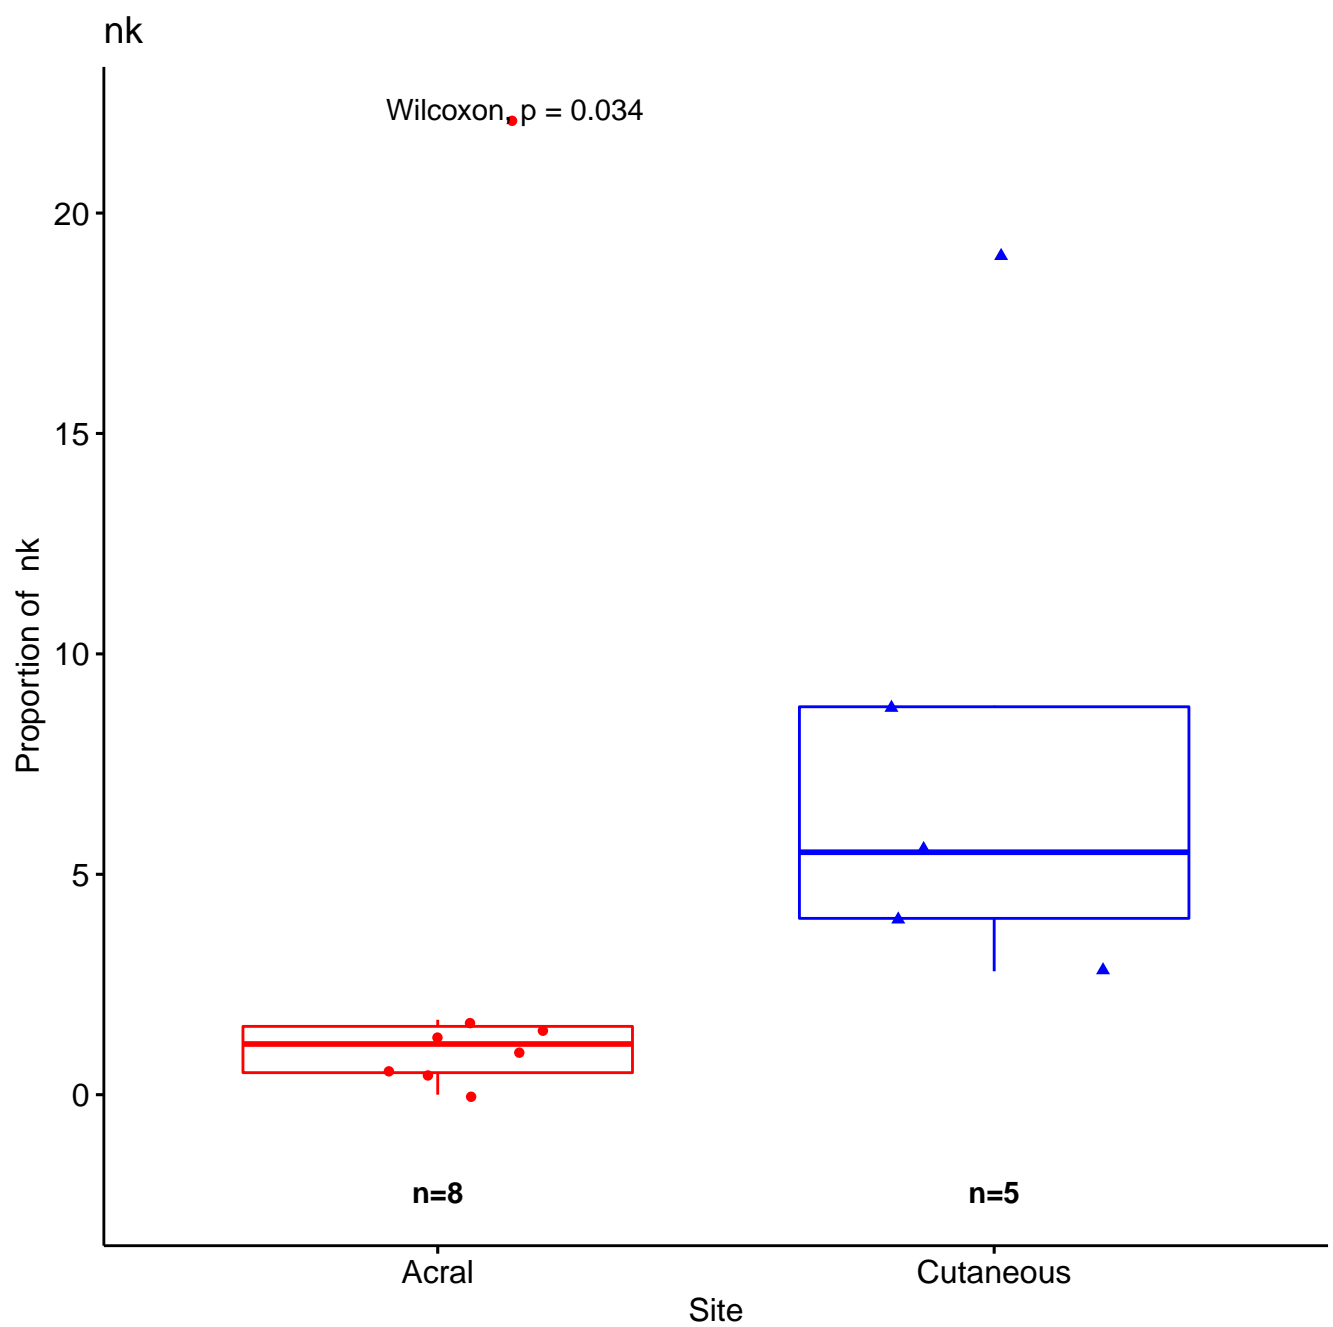

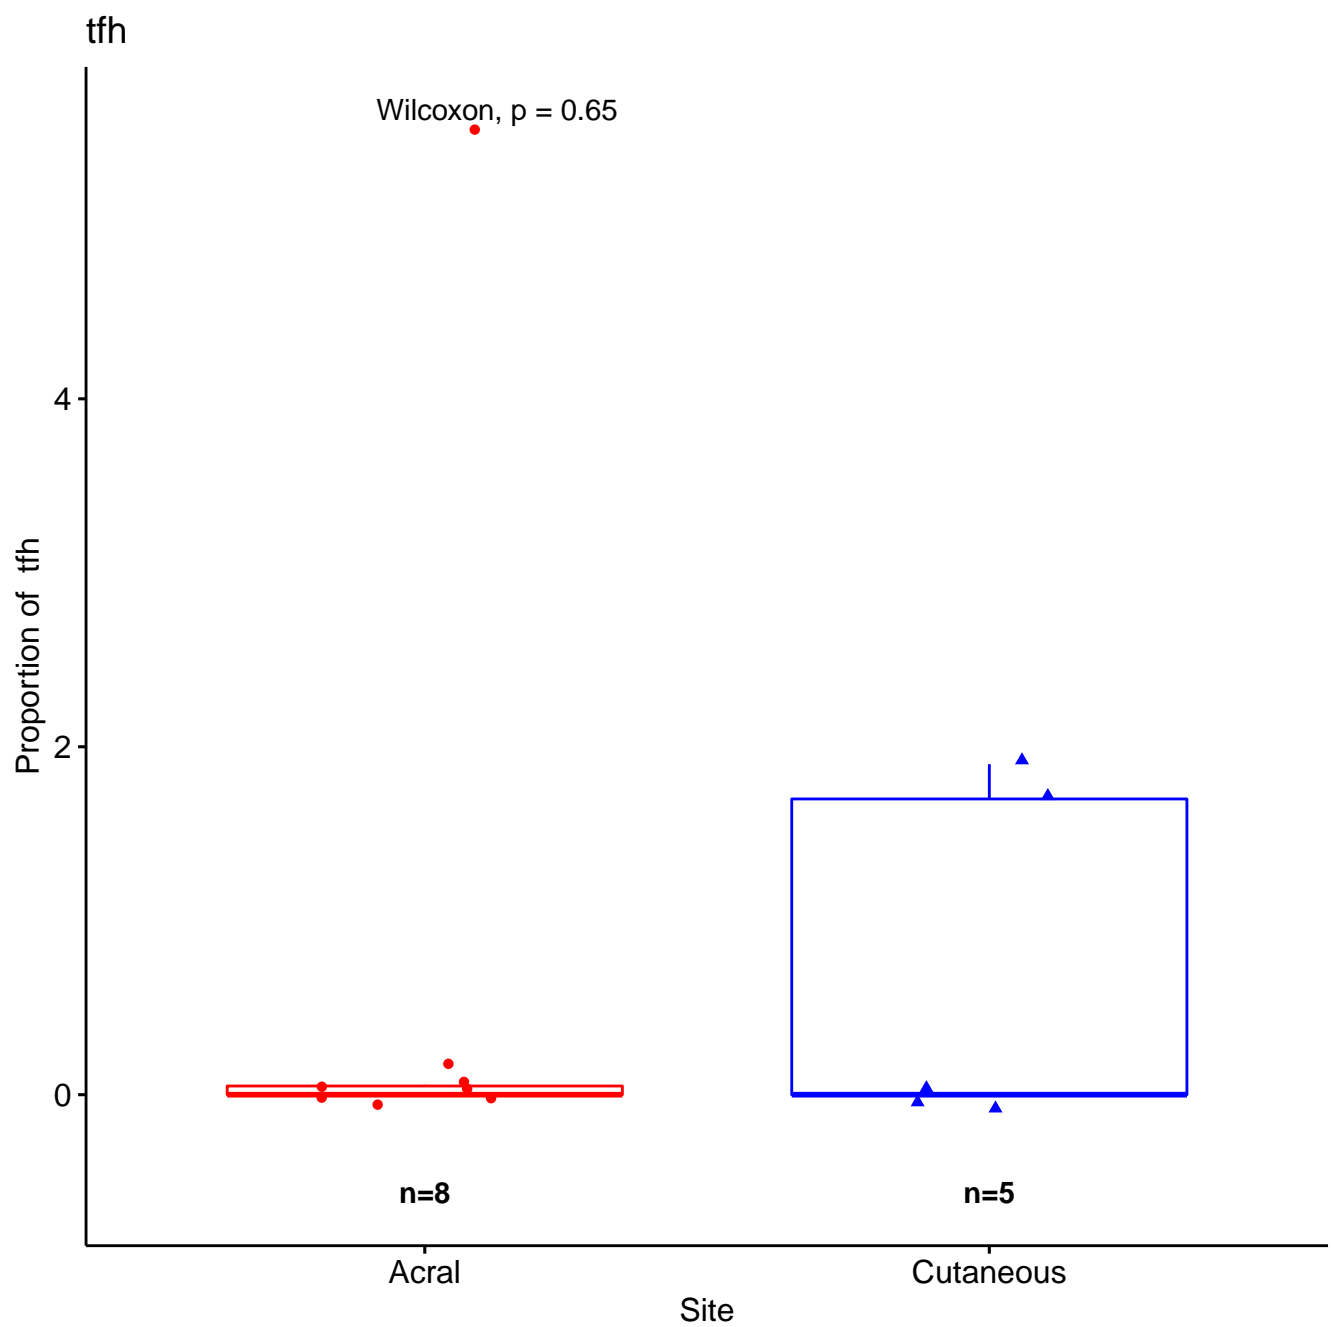

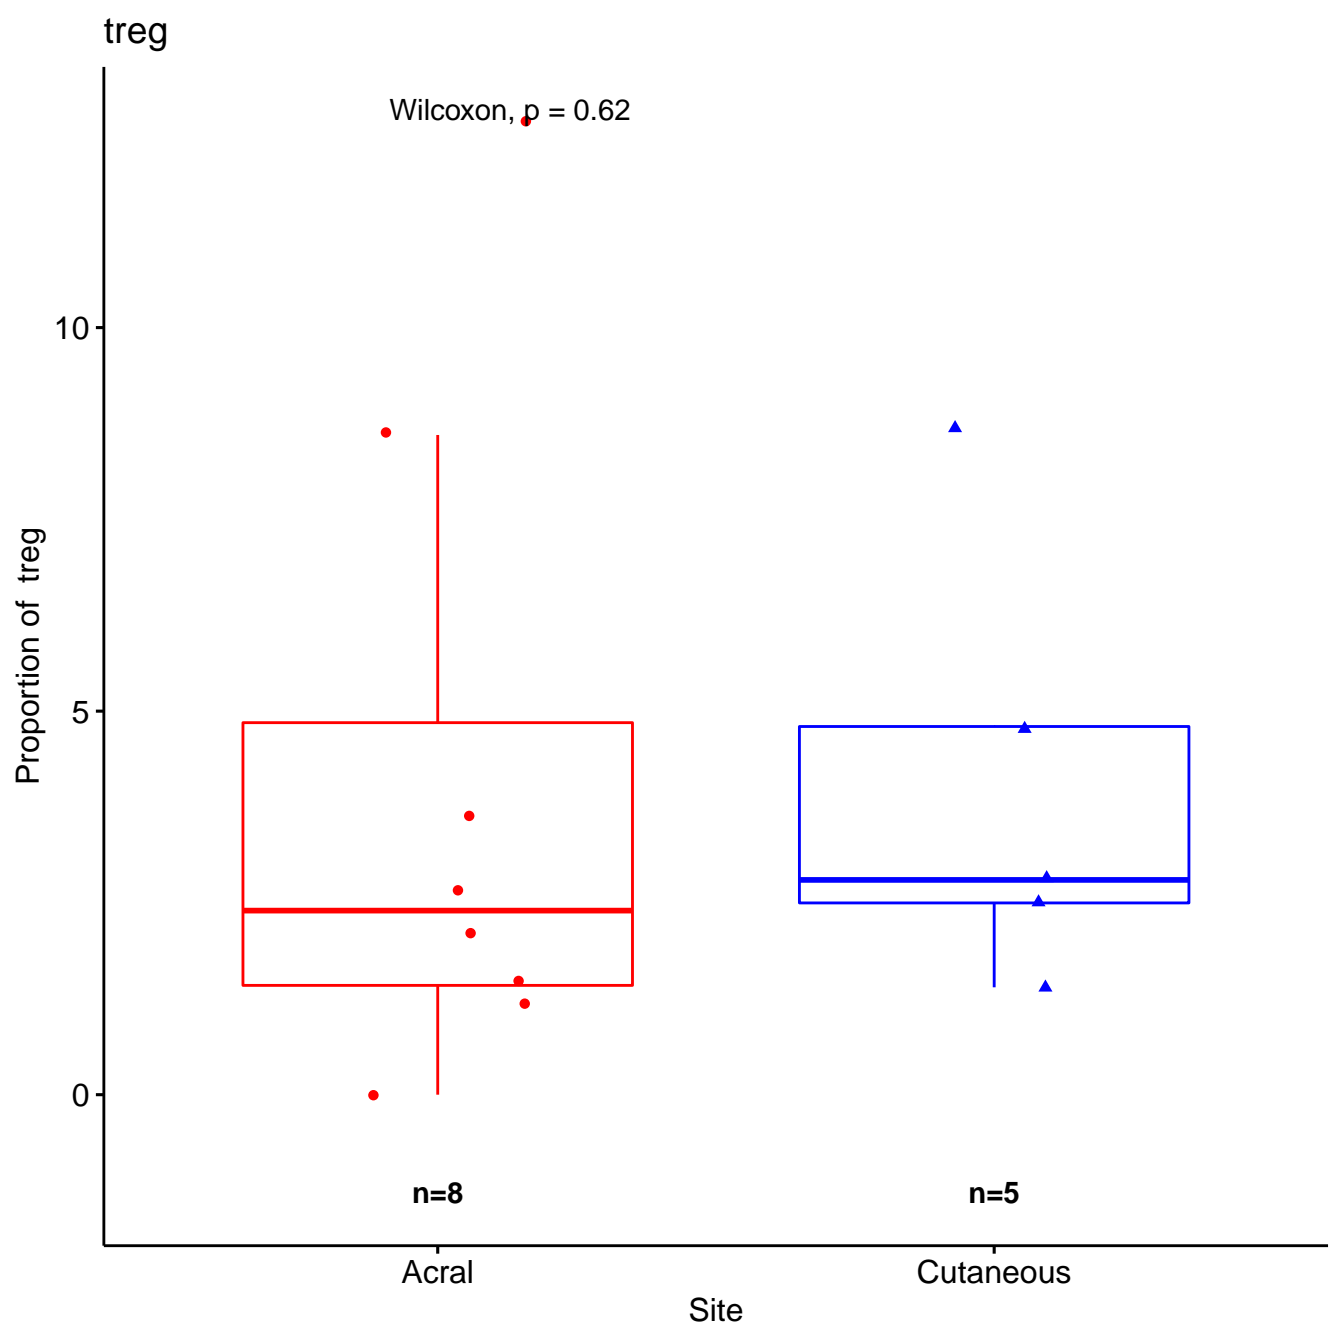

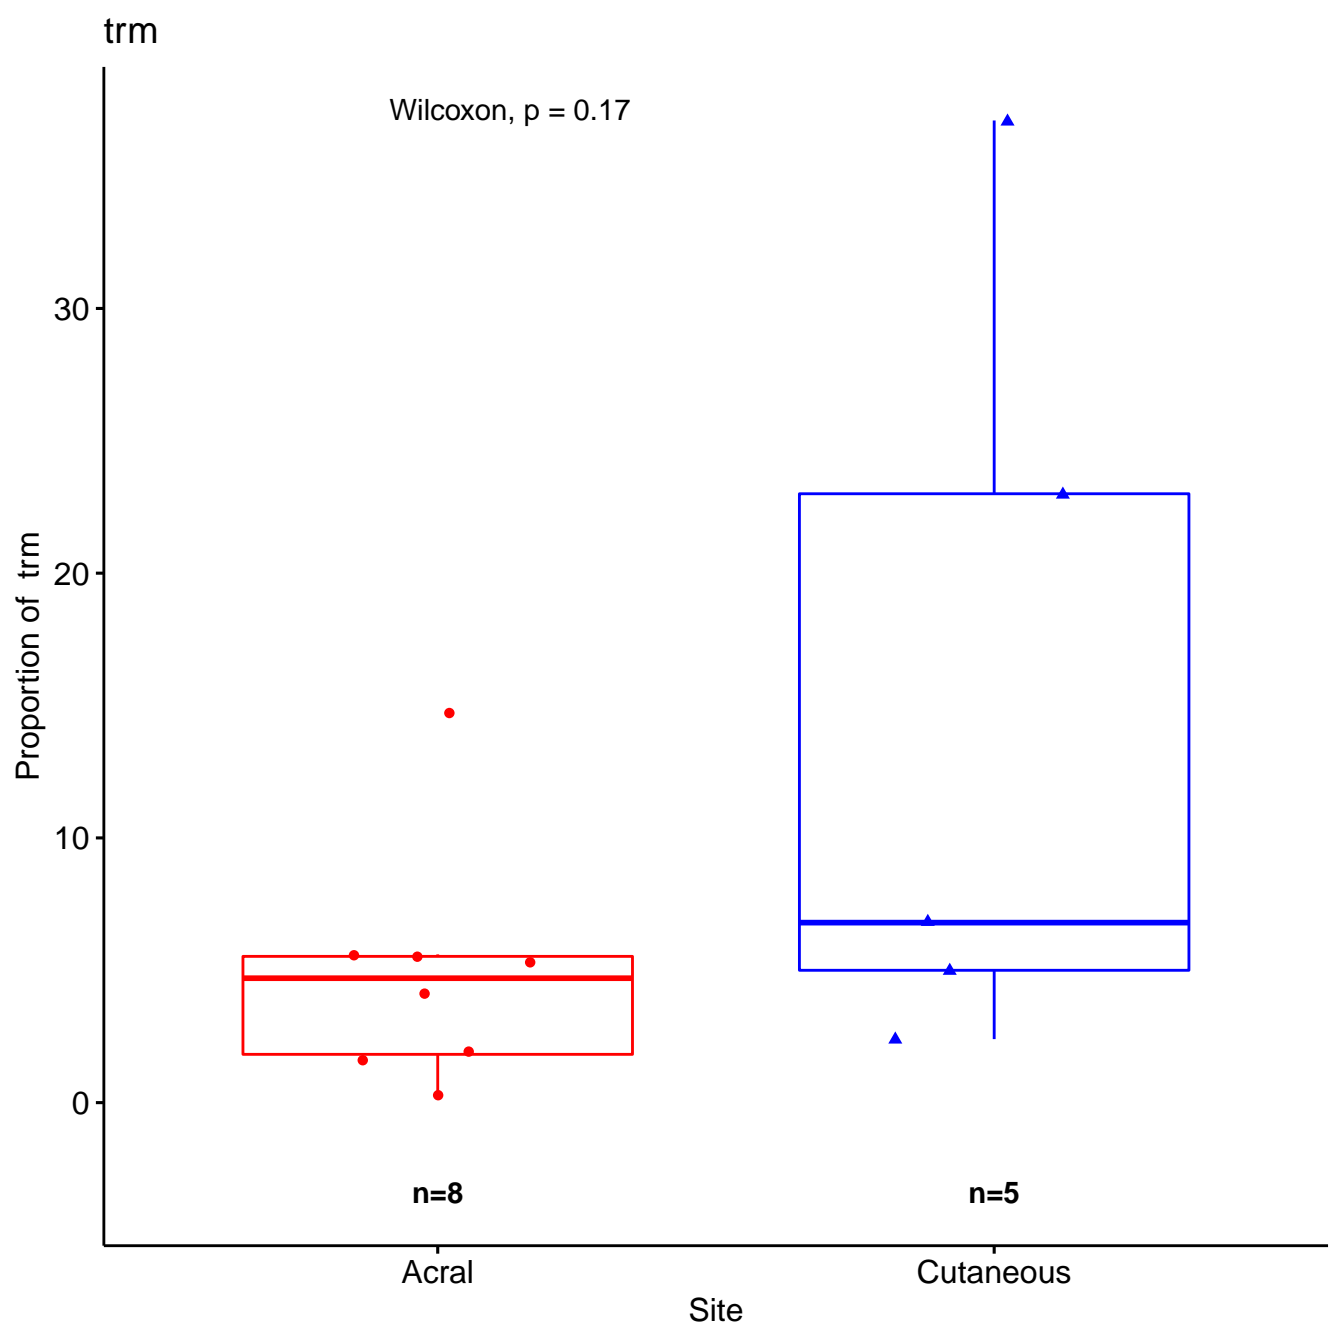

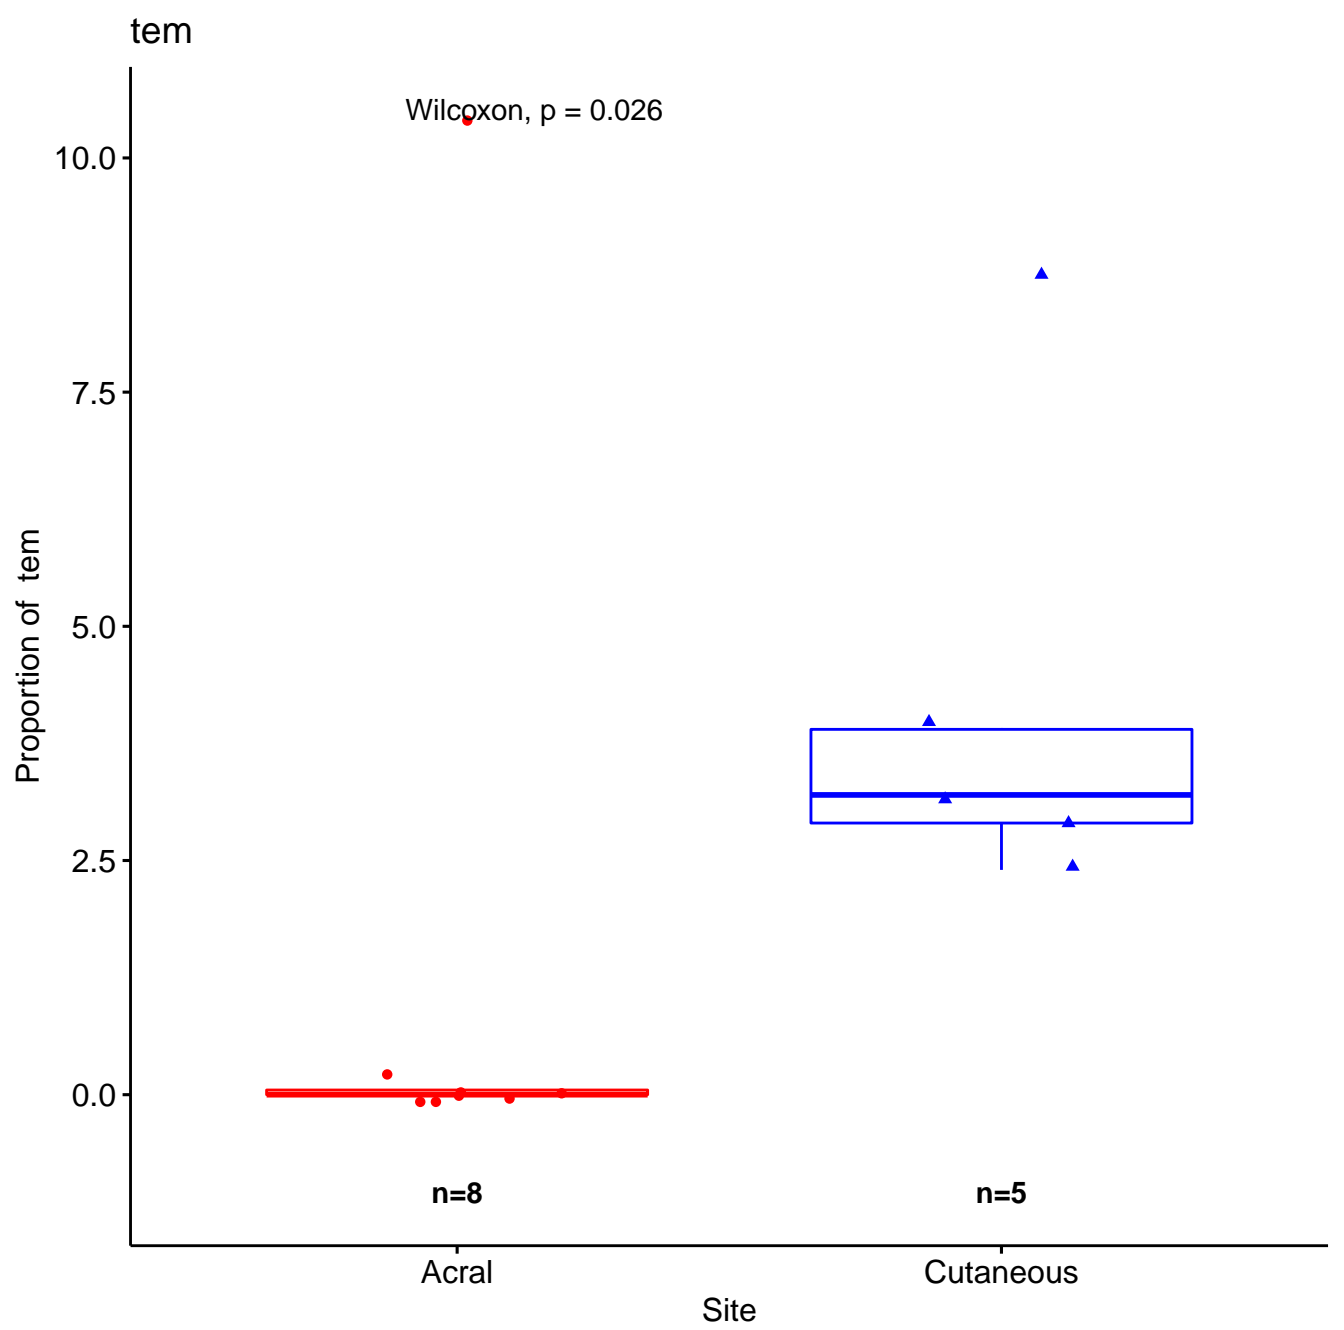

immu\_infiltrate

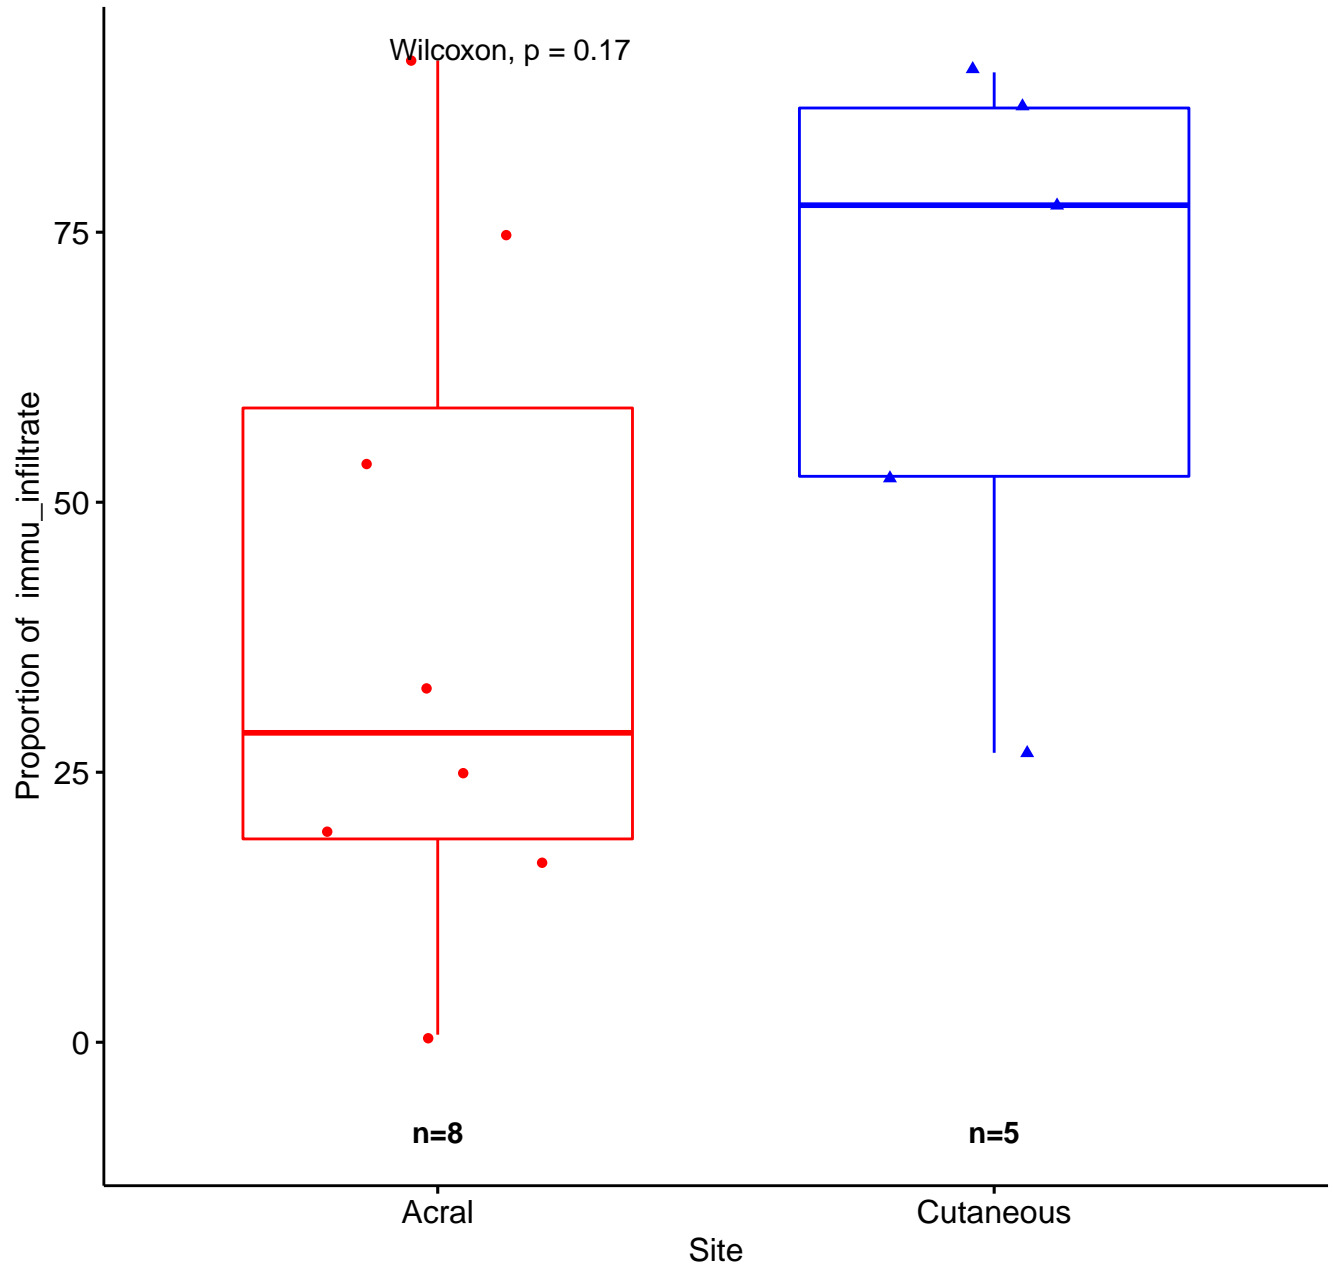



gamma\_delta\_t

4

3

2

1

0

Wilcoxon,  $p = 0.022$

Proportion of gamma\_delta\_t

n=8

n=5

Acral

Cutaneous

Site

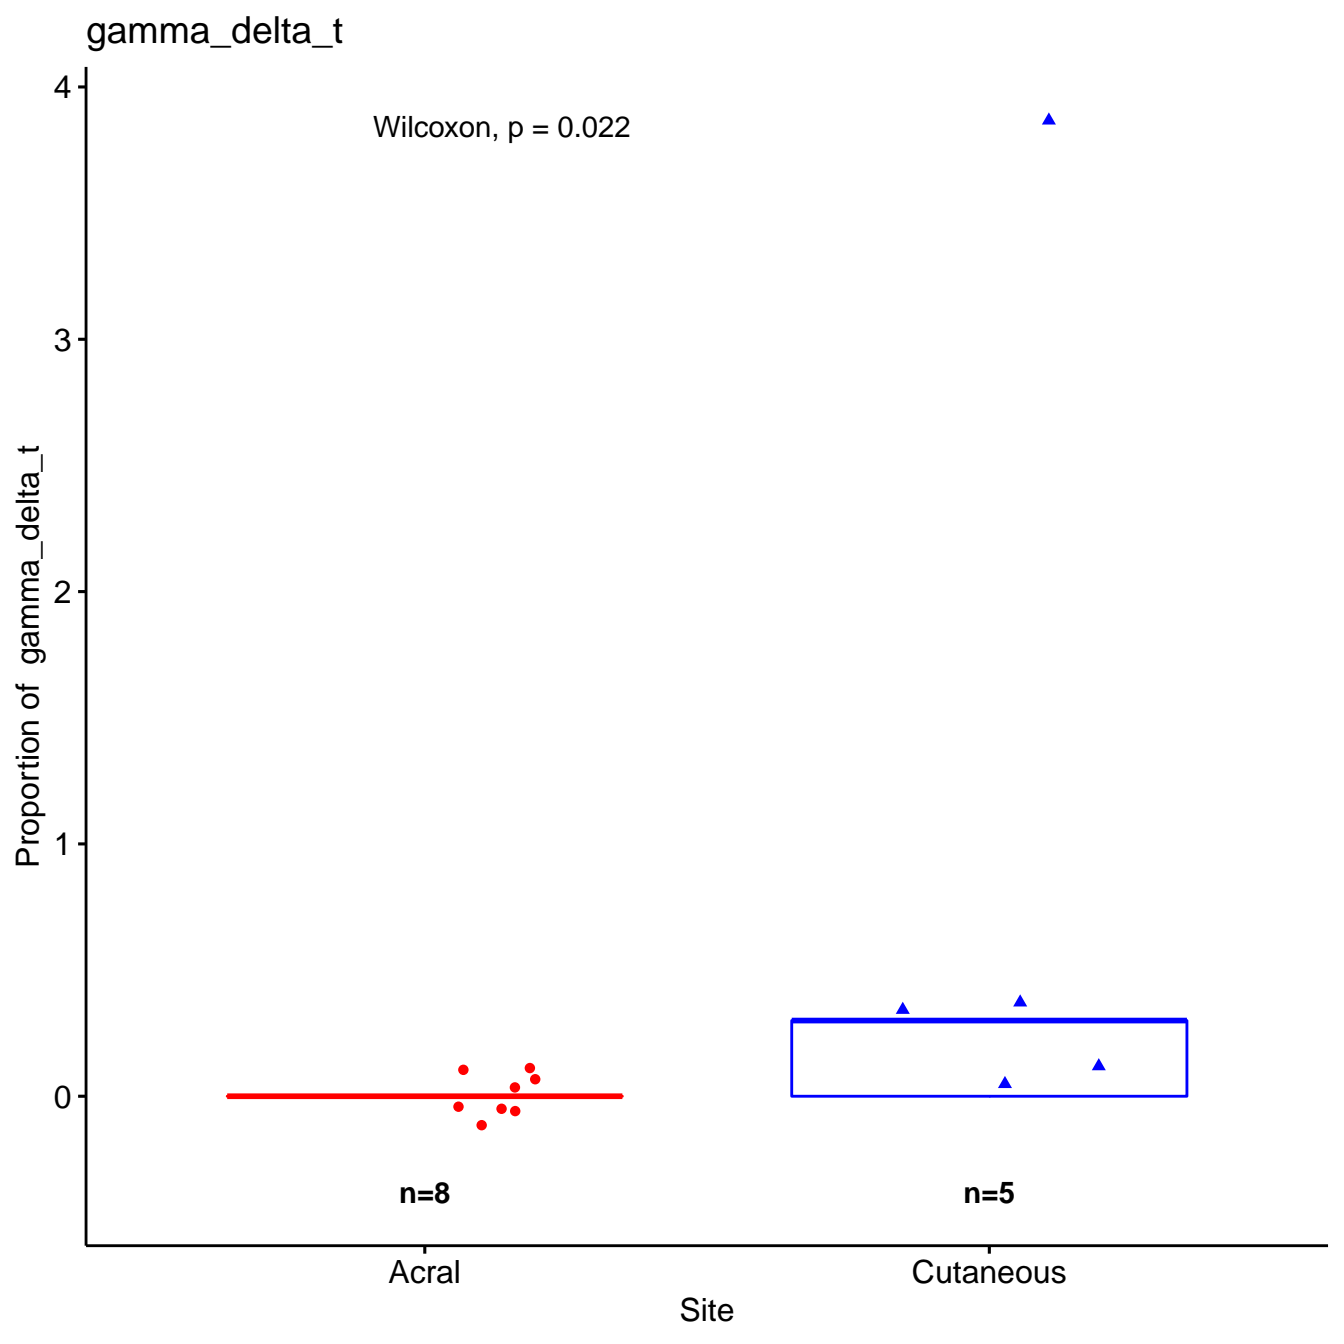

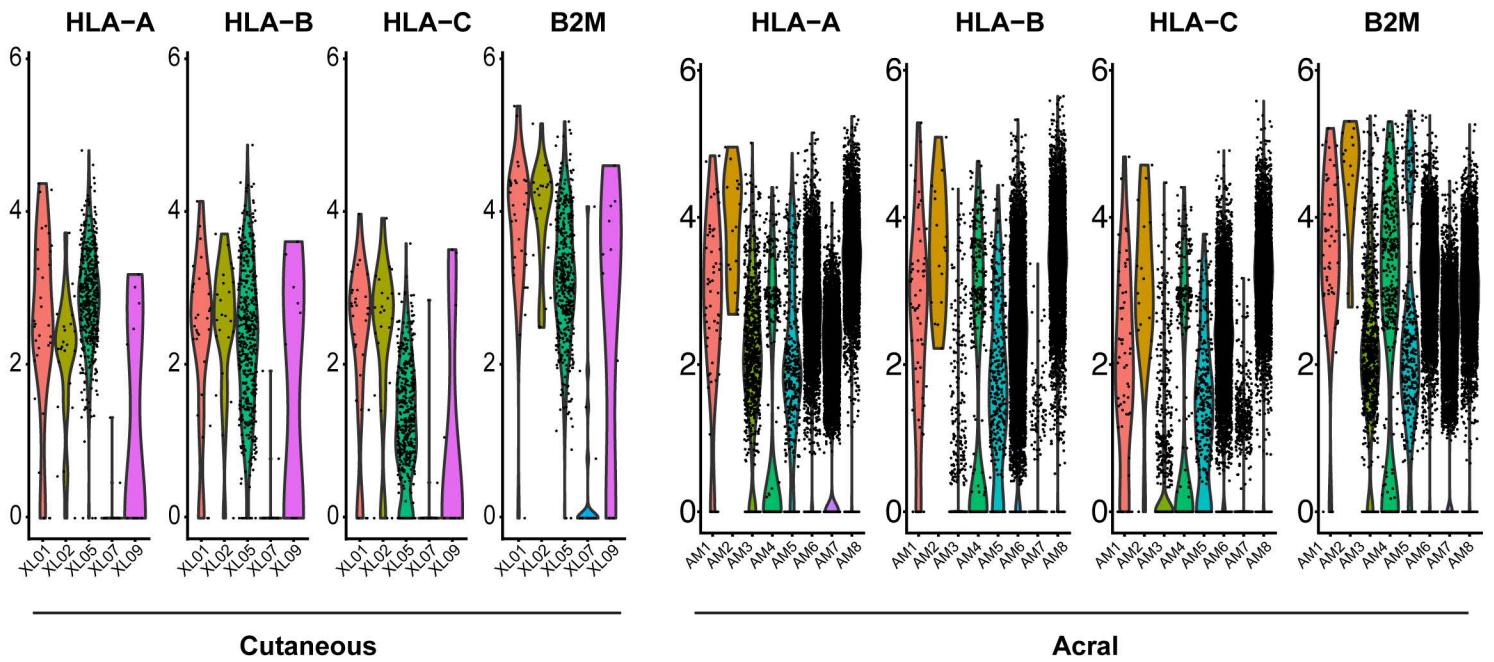

**Supplemental Figure 14.** Violin plots showing the expression of HLA genes in the tumor cells for each acral and cutaneous melanoma sample. AM8 sample shown is the primary tumor.
