# Supplementary material
Source: PubMed Central journal article supplement (PMC9106889)
Supplement: NIHMS1788166-supplement-6.pdf [file NIHMS1788166-supplement-6.pdf]

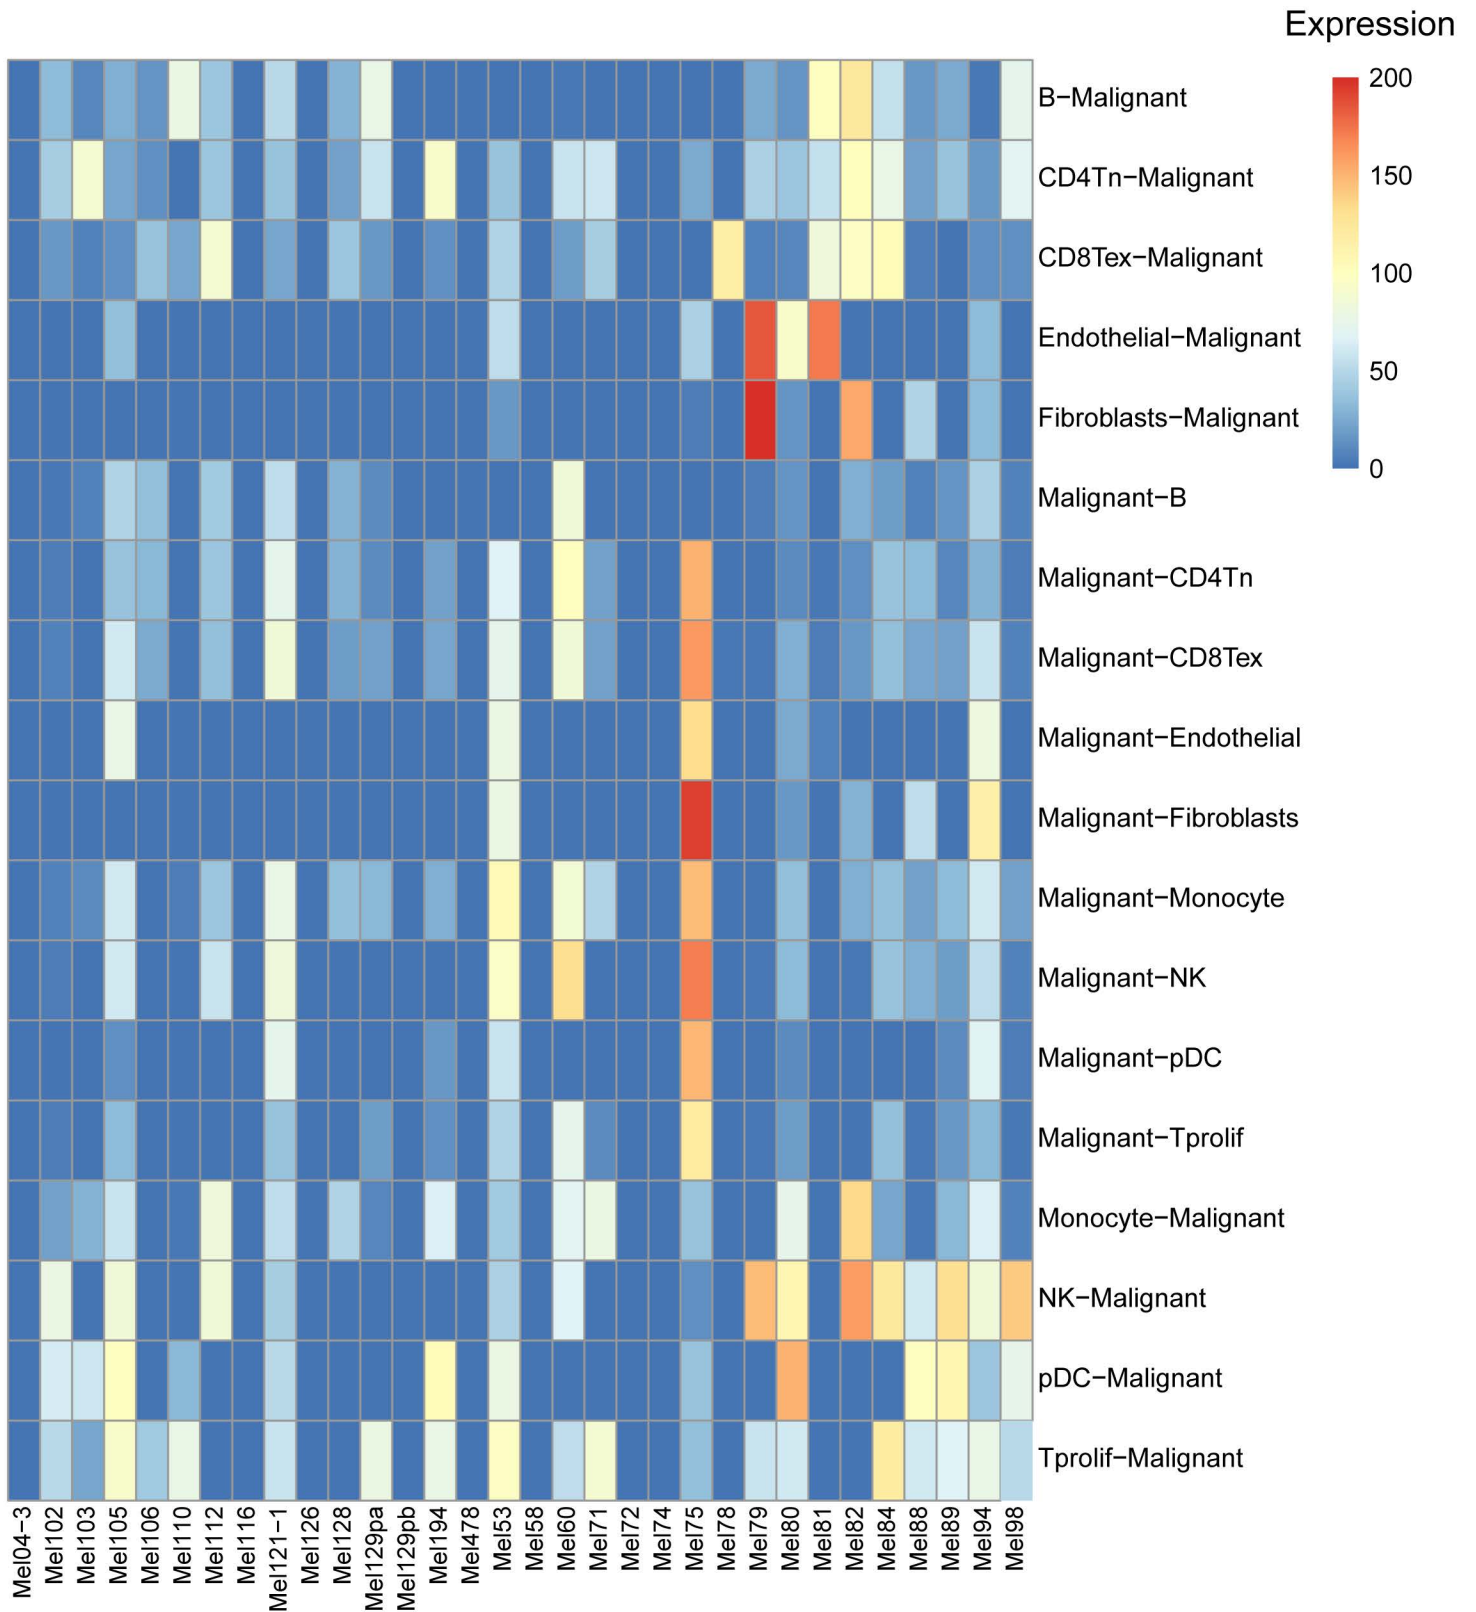

**Supplemental Figure 15.** Heatmap visualizing the interaction LRscores between Tumor cells and other major subpopulations of cells in individual samples of cutaneous non-acral melanoma in the GSE115978 public dataset.

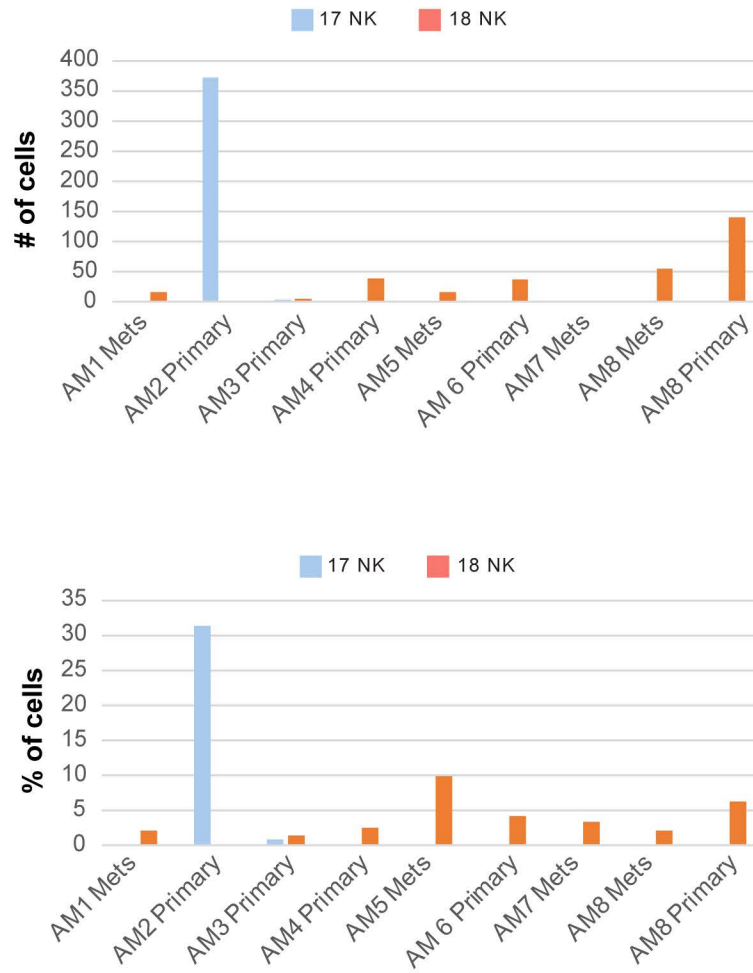

**Supplemental Figure 16.** Bar graphs showing the number (top) and percentage (bottom) of each NK cell cluster by sample.

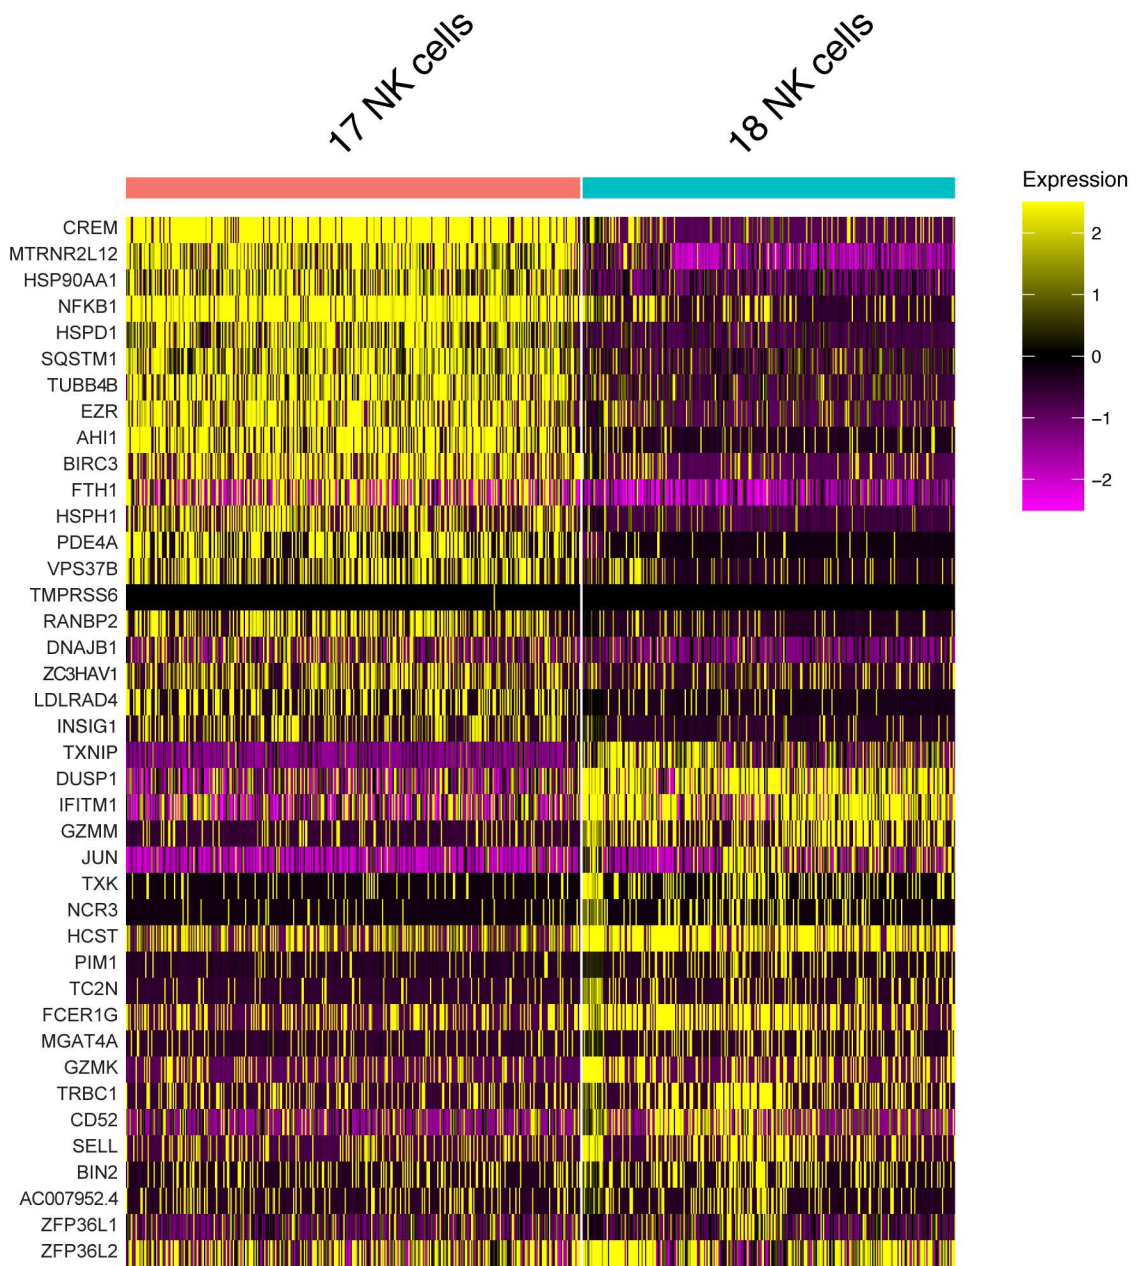

**Supplemental Figure 17.** Unsupervised clustering identifies 2 subsets of NK cells in acral melanoma specimens.

**A**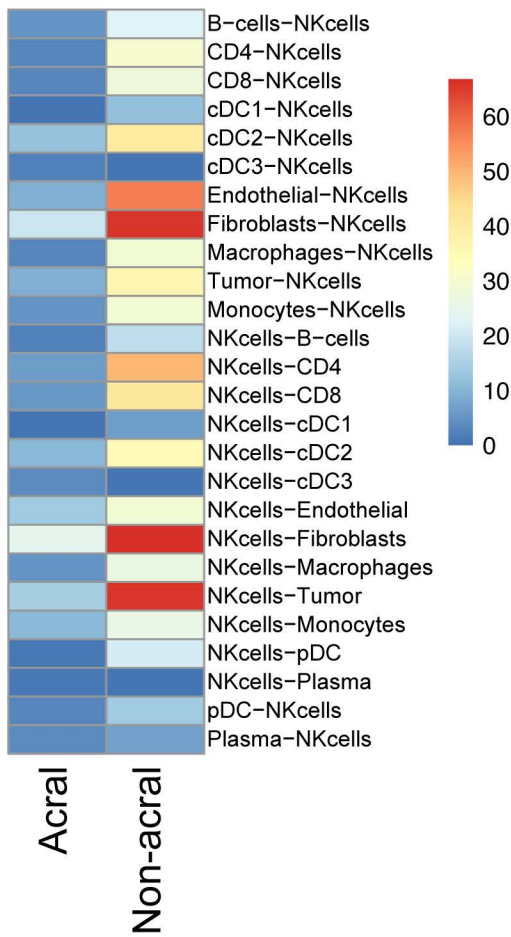**B**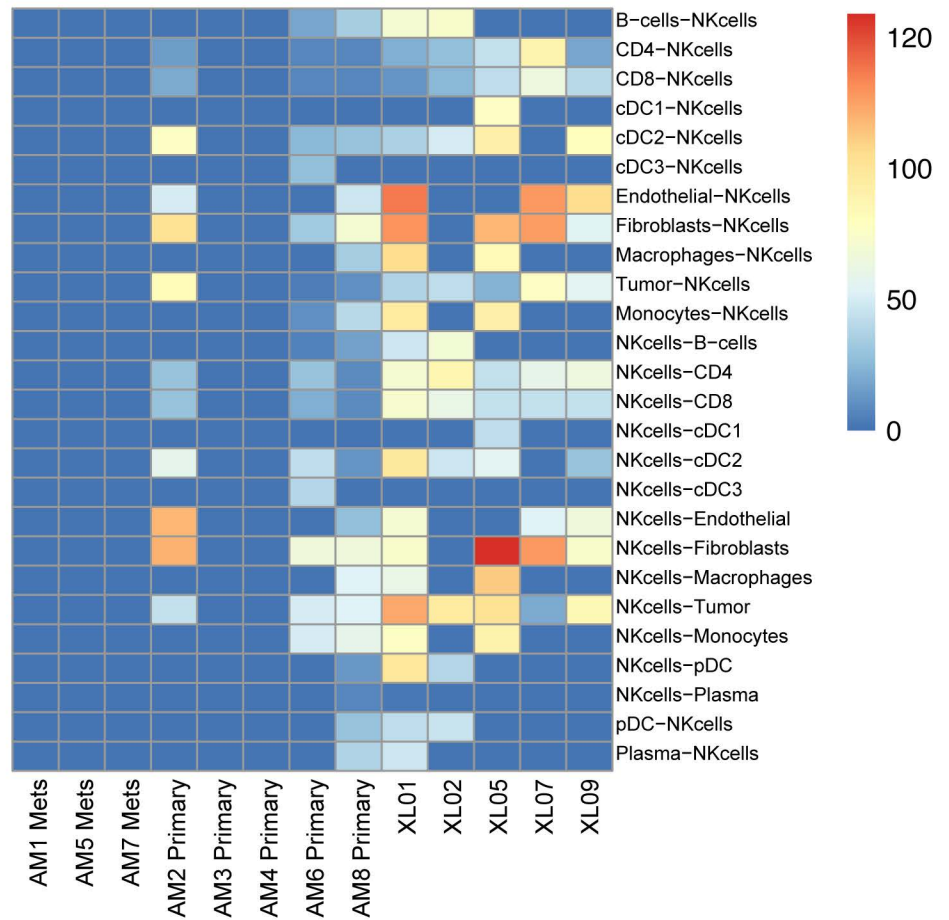

**Supplemental Figure 18. A.** Heatmap visualizing the average interaction LRscores between NK cells and other major subpopulations of cells in cutaneous acral and non-acral melanoma cohorts. **B.** Heatmap visualizing the interaction LRscores between NK cells and other major subpopulations of cells in individual samples of cutaneous acral and non-acral melanoma.

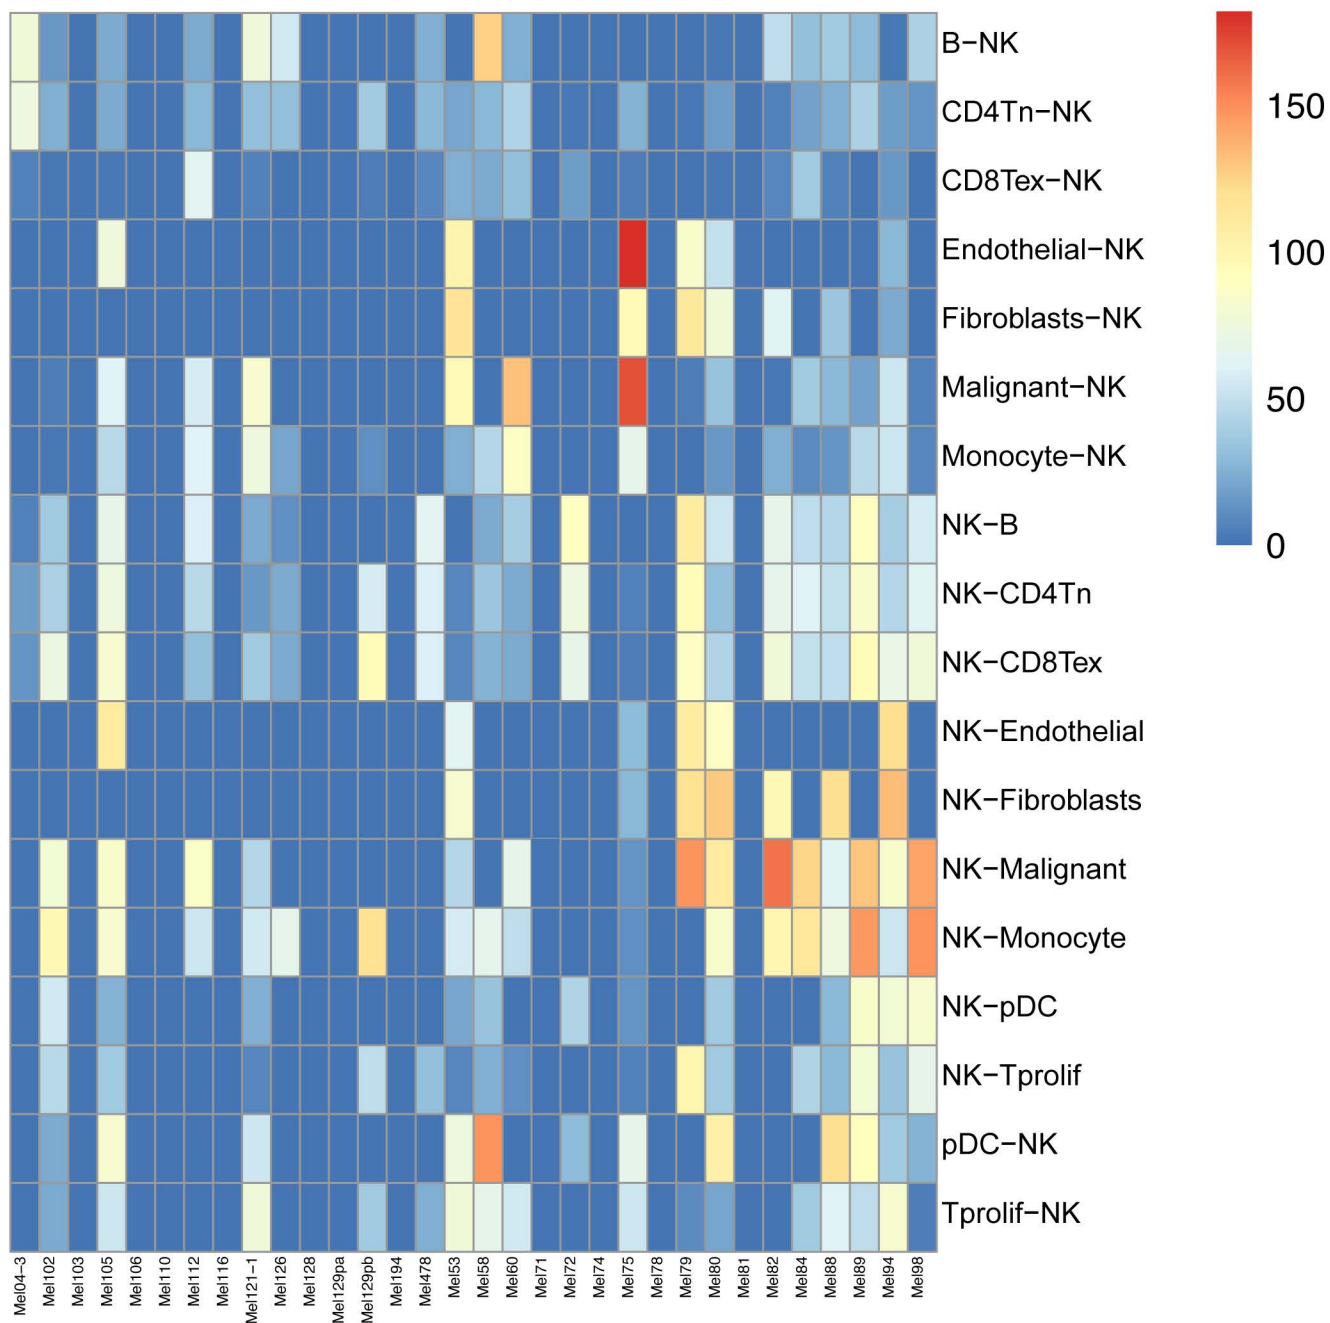

**Supplemental Figure 19.** Heatmap visualizing the interaction LRscores between NK cells and other major subpopulations of cells in individual samples of cutaneous non-acral melanoma in the GSE115978 public dataset.

### Tumor-NKcells

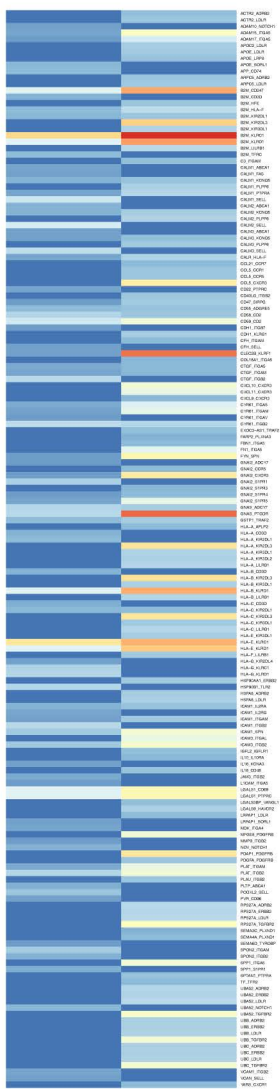

### Tumor-NKcells

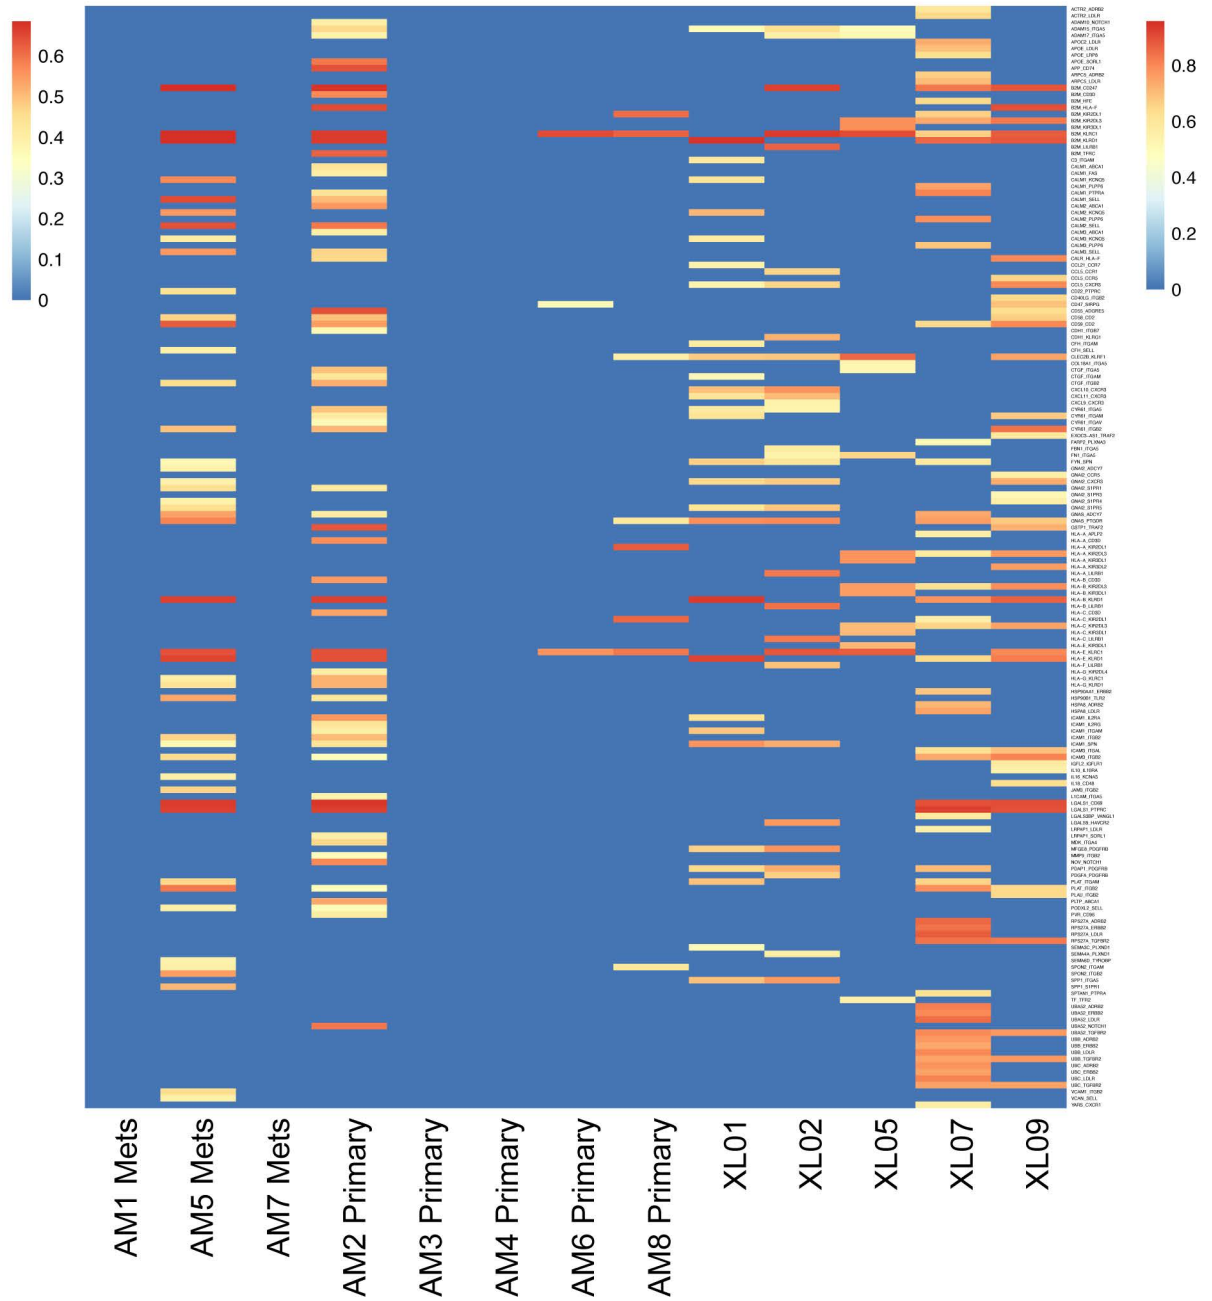

**Supplemental Figure 20. A.** Heatmap visualizing the average ligand-receptor interaction LRscores between NK cells and tumor cells in cutaneous acral and non-acral melanoma cohorts. **B.** Heatmap visualizing the specific ligand-receptor interaction LRscores between NK cells and tumor cells in individual samples of cutaneous acral and non-acral melanoma.
