# Supplementary material
Source: PubMed Central journal article supplement (PMC9106889)
Supplement: NIHMS1788166-supplement-7.pdf [file NIHMS1788166-supplement-7.pdf]

**Supplemental Figure 22.** Boxplots showing the relative percentage of T/NK cells expressing immune checkpoint receptors in acral and non-acral (cutaneous) melanoma samples.

# ADORA2A

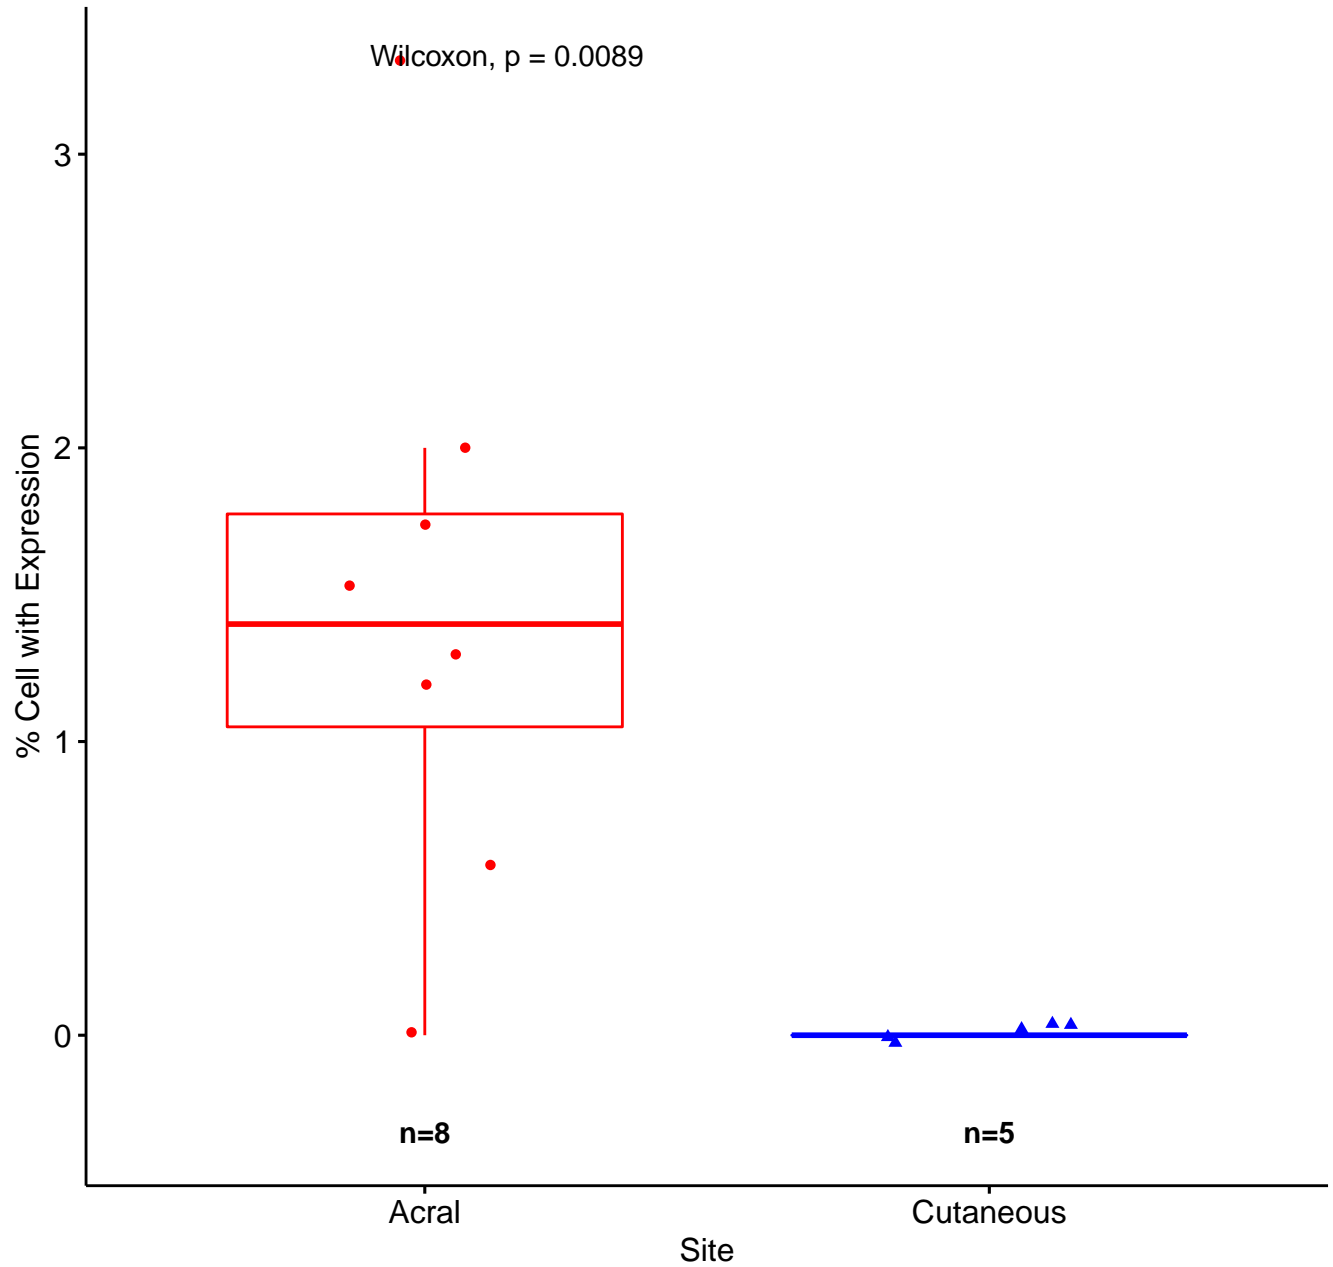

NT5E

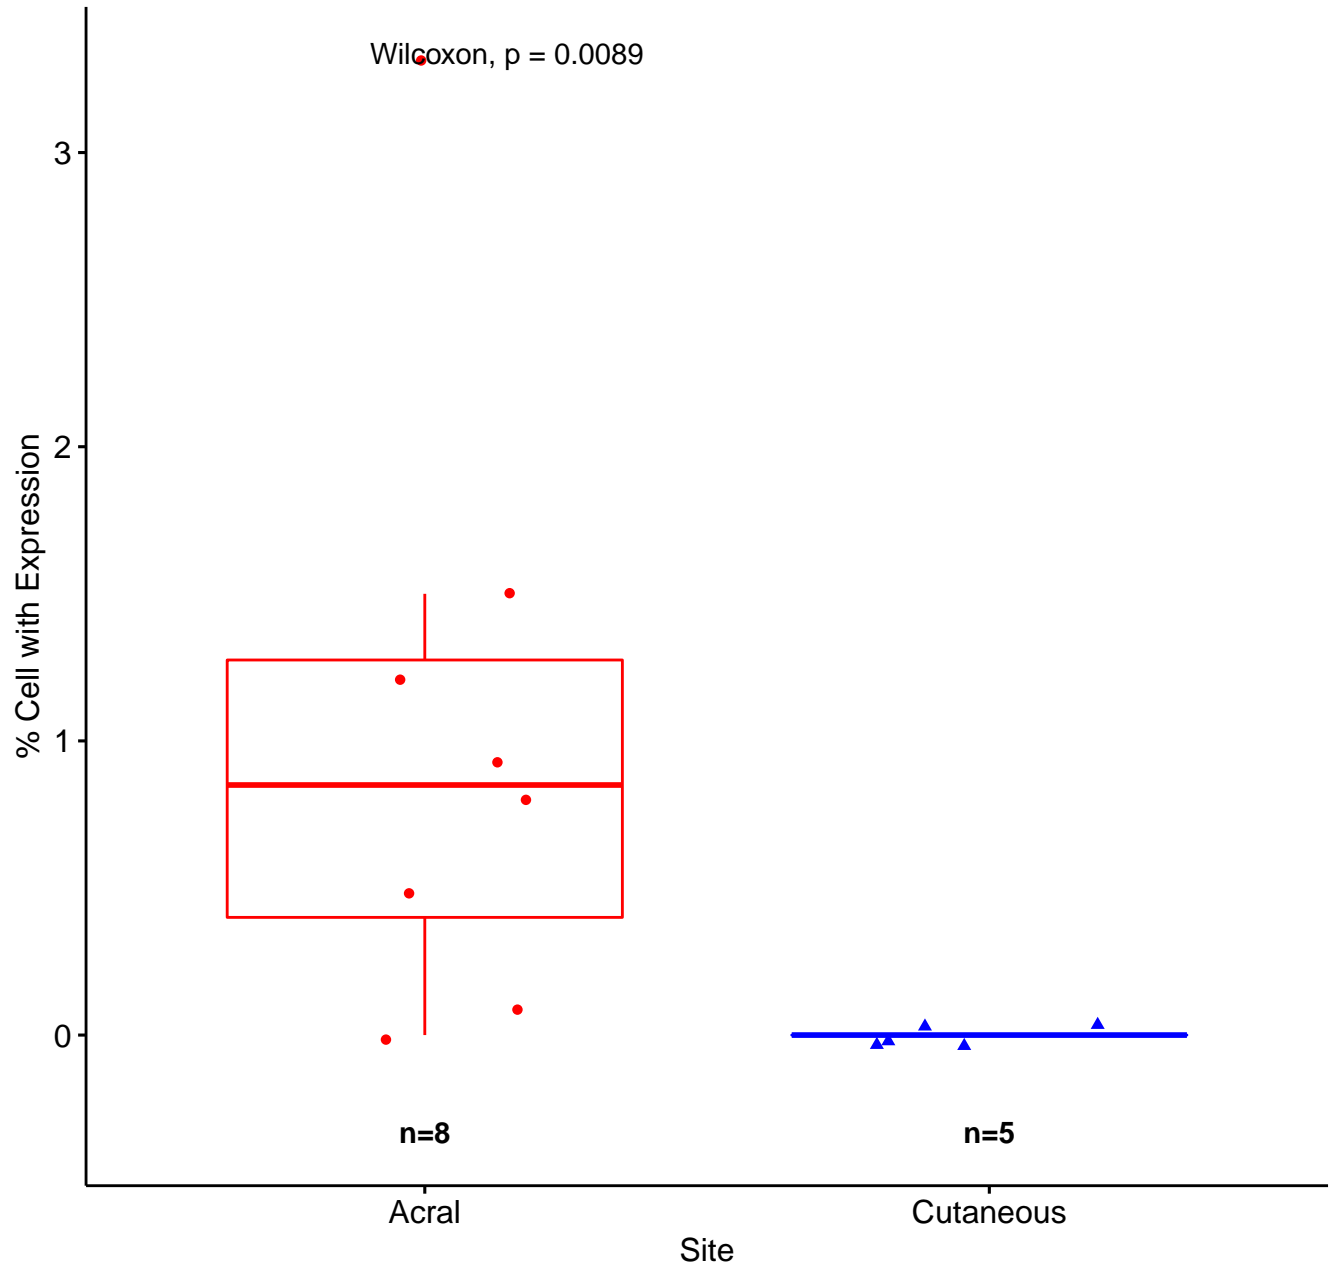

# ENTPD1

Wilcoxon,  $p = 0.057$

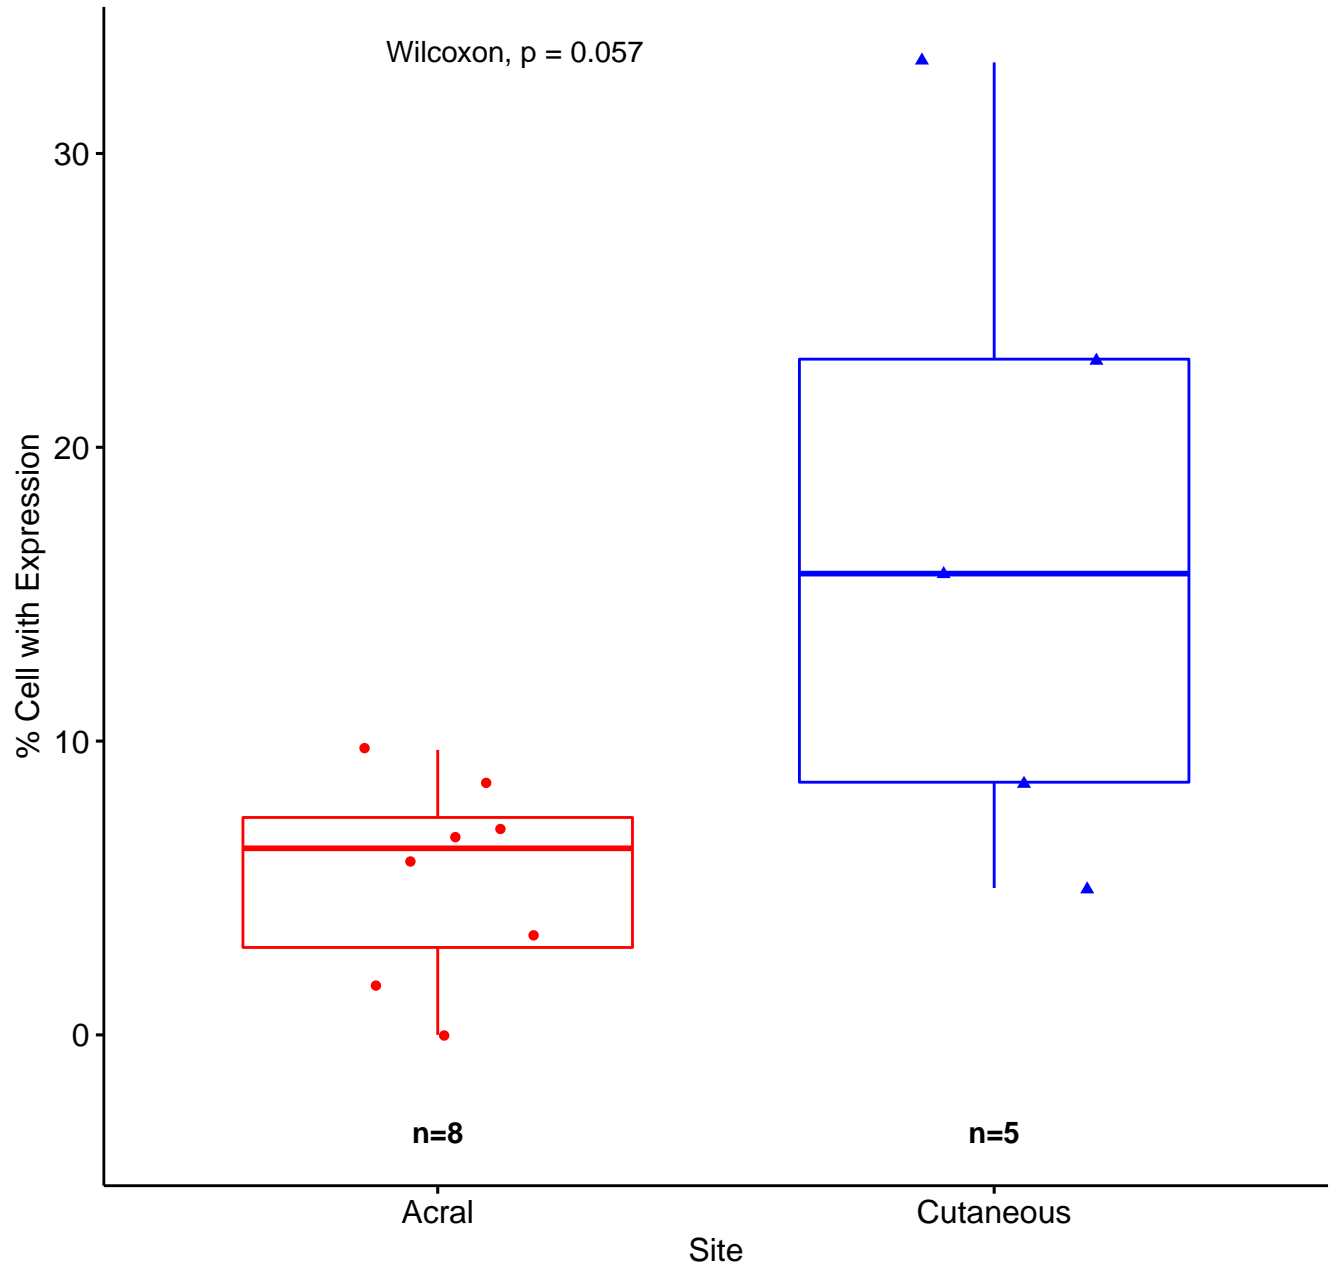

# BTLA

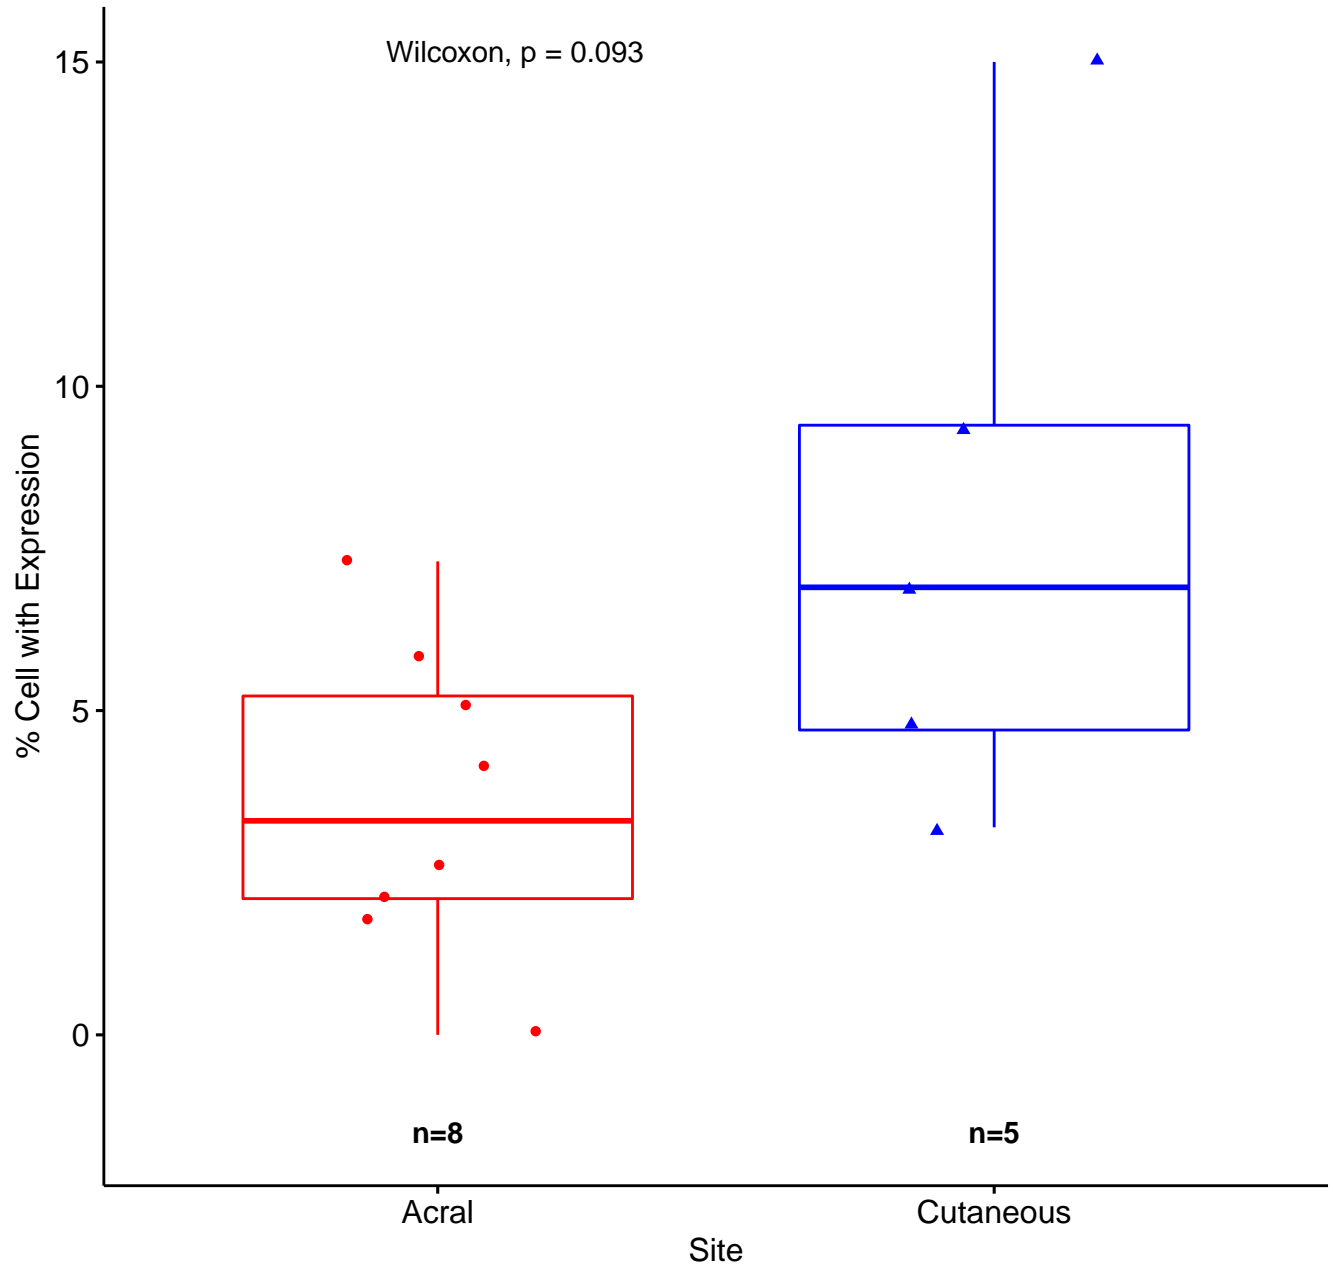

# CD274

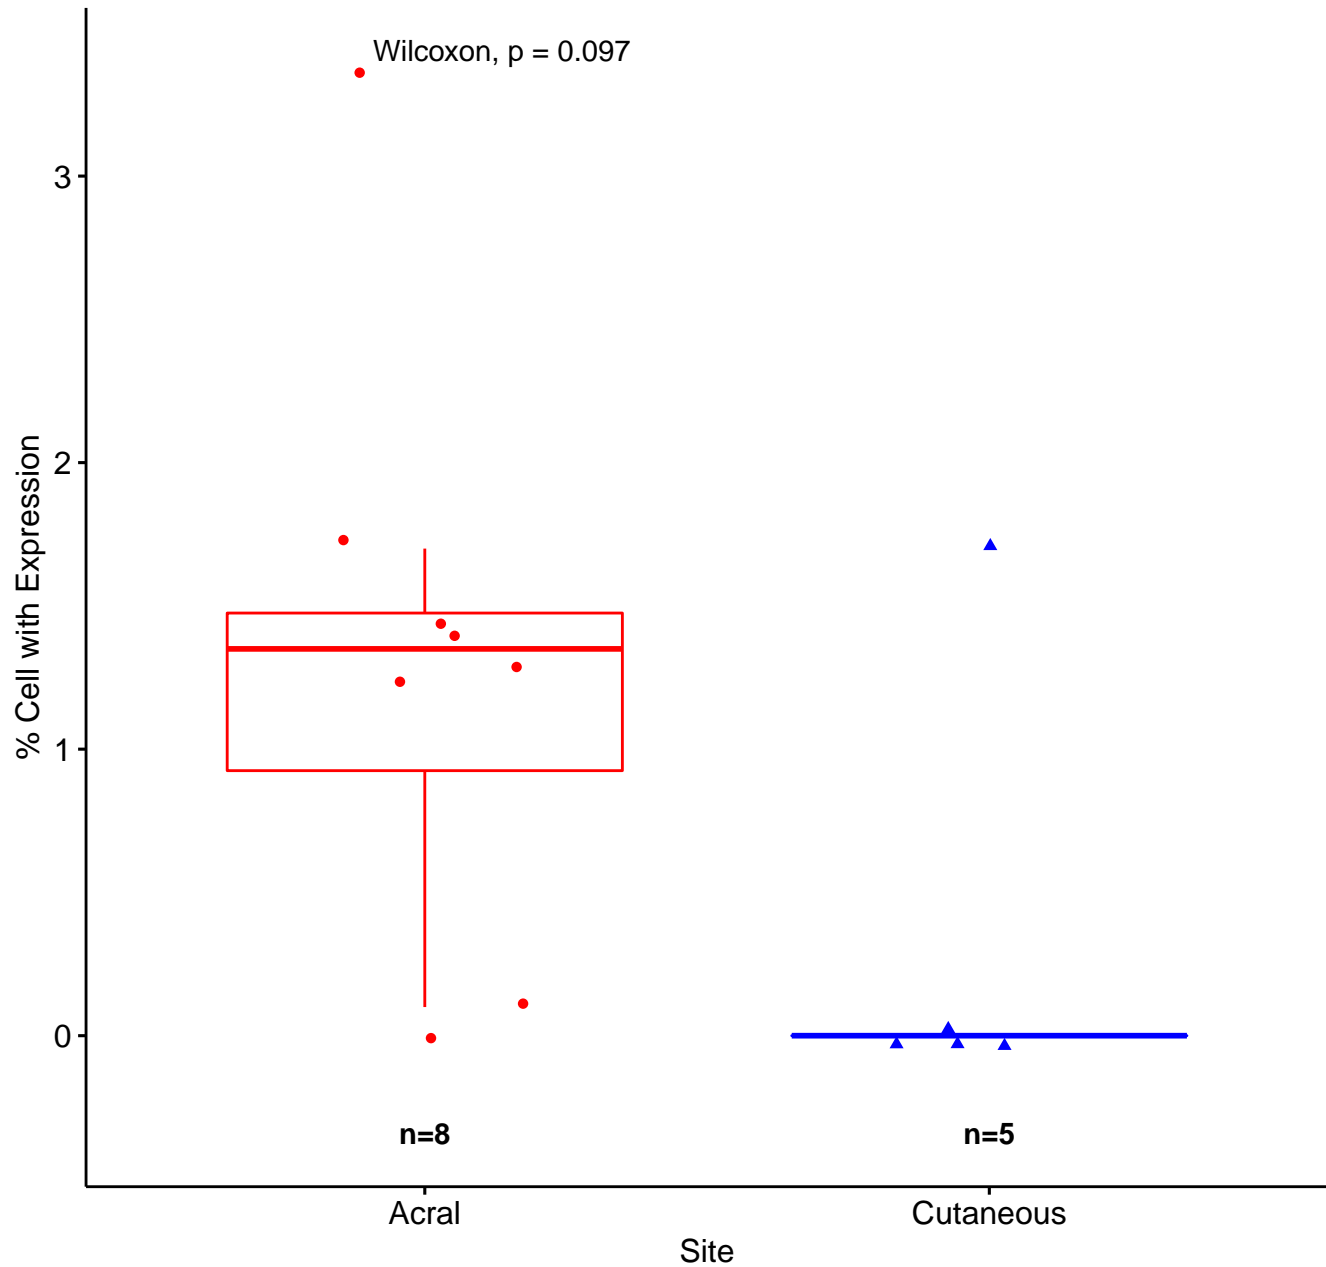

# CD276

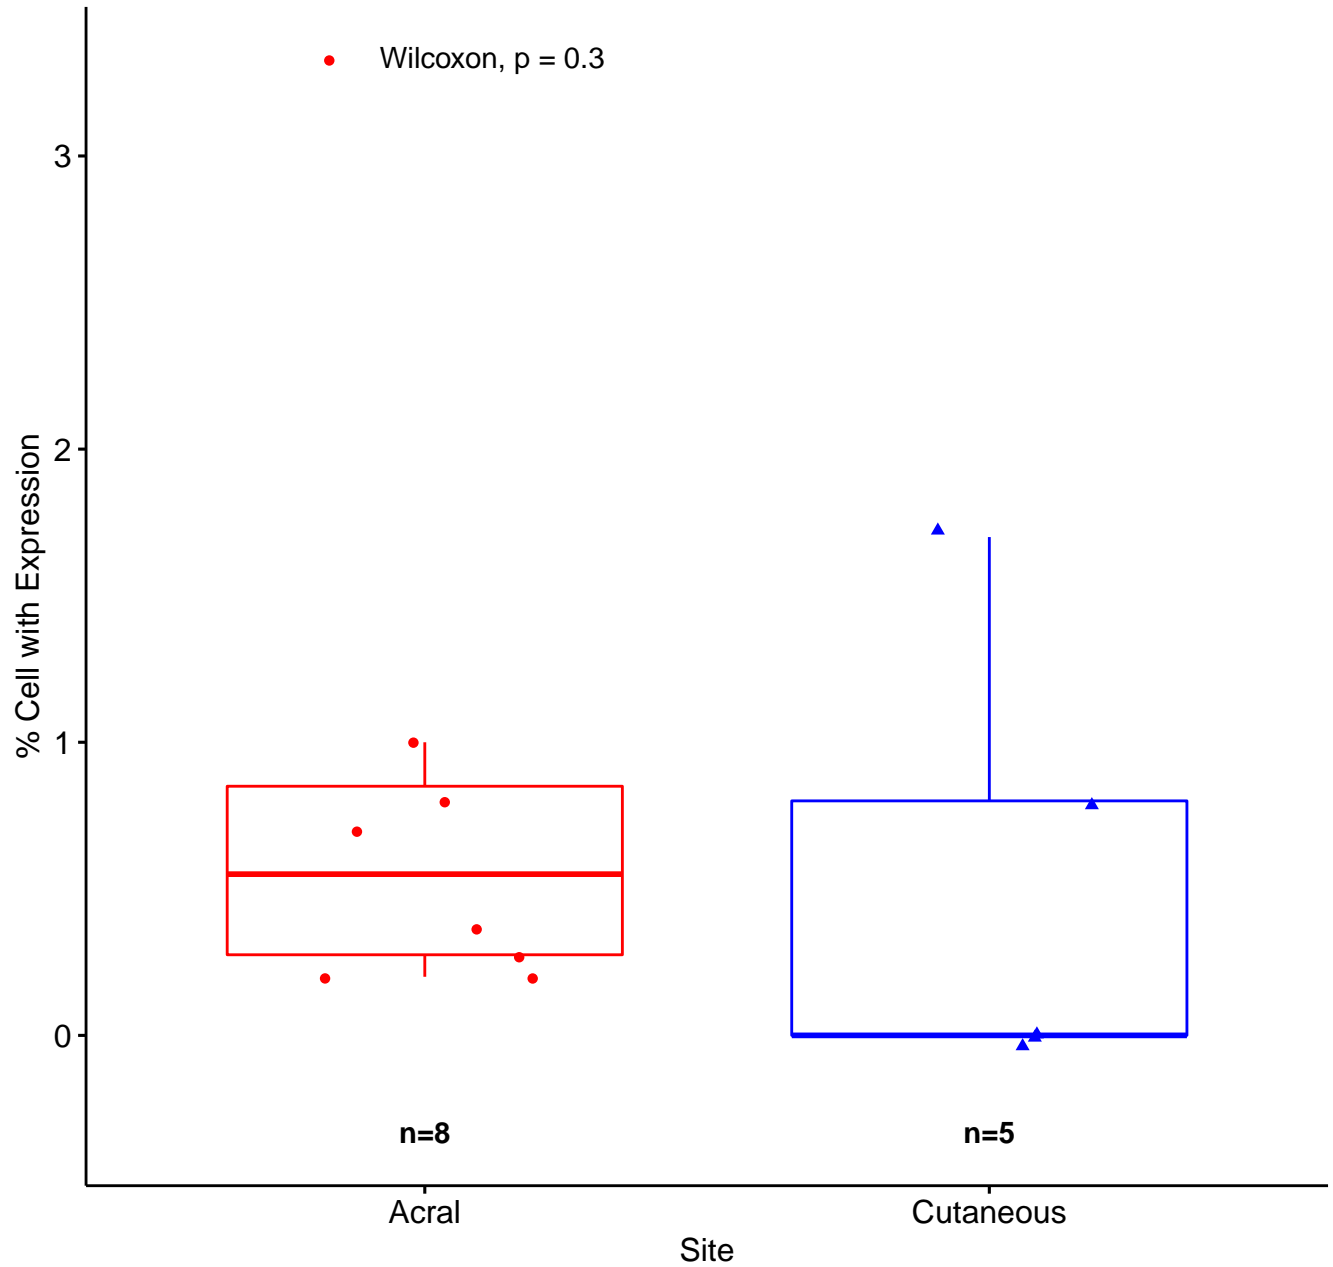

# CD80

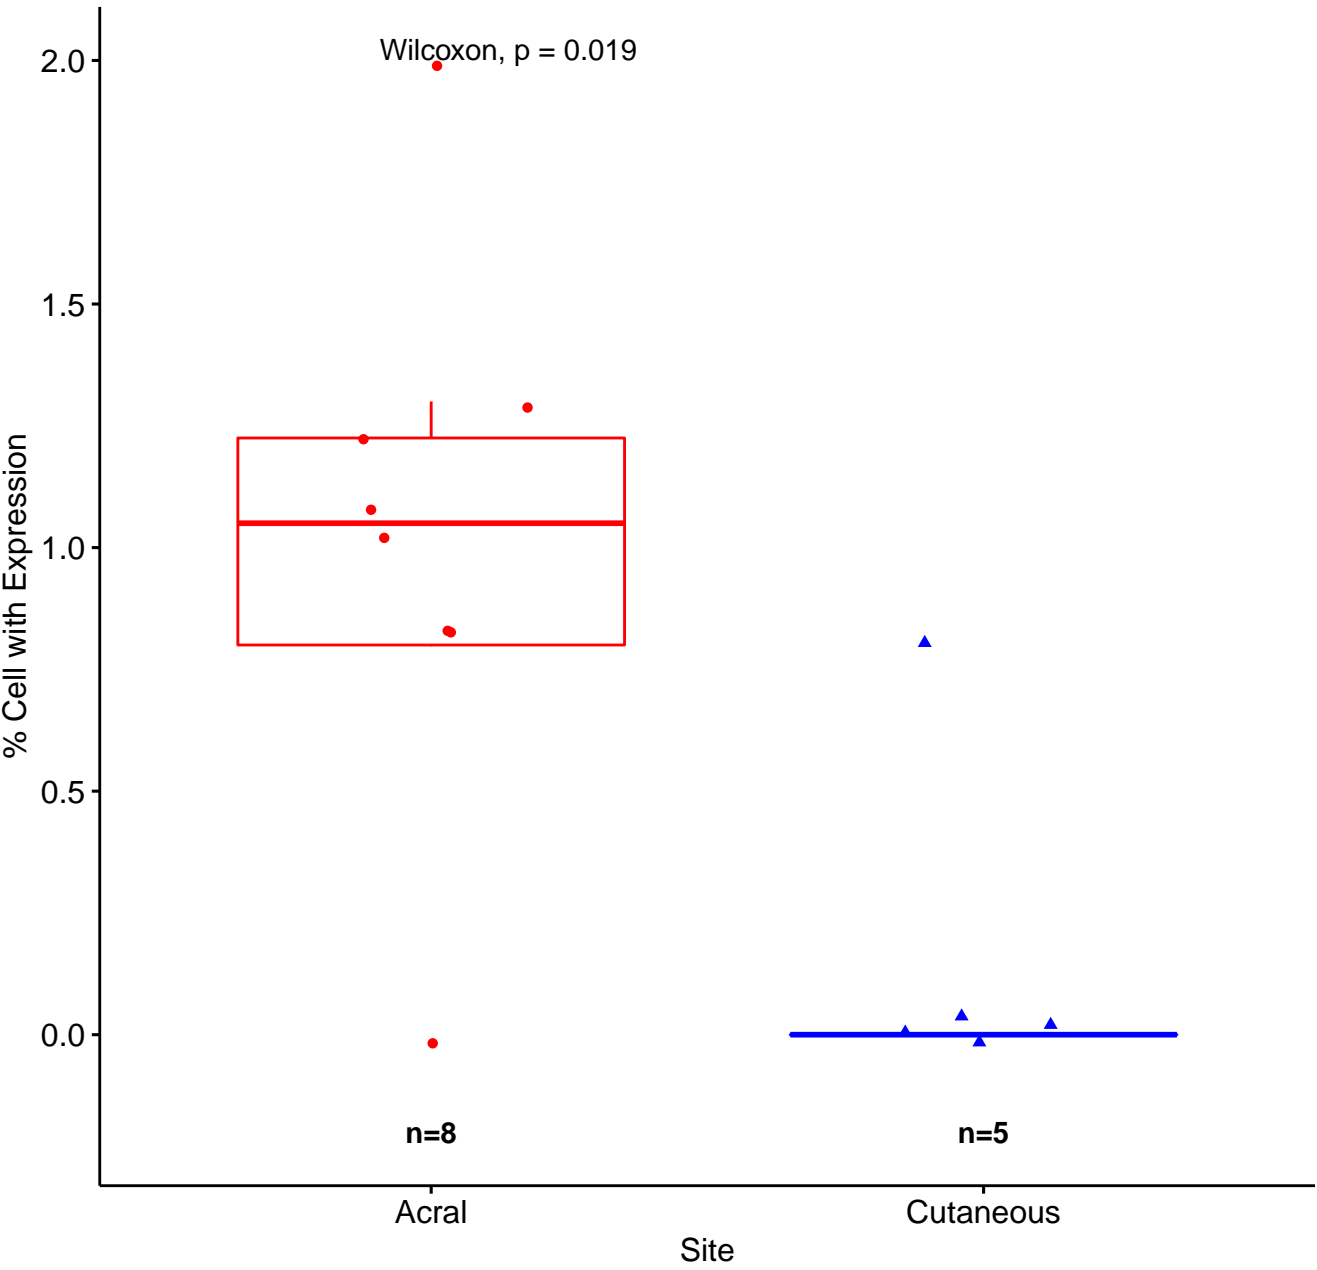



# CD86

Wilcoxon,  $p = 0.5$

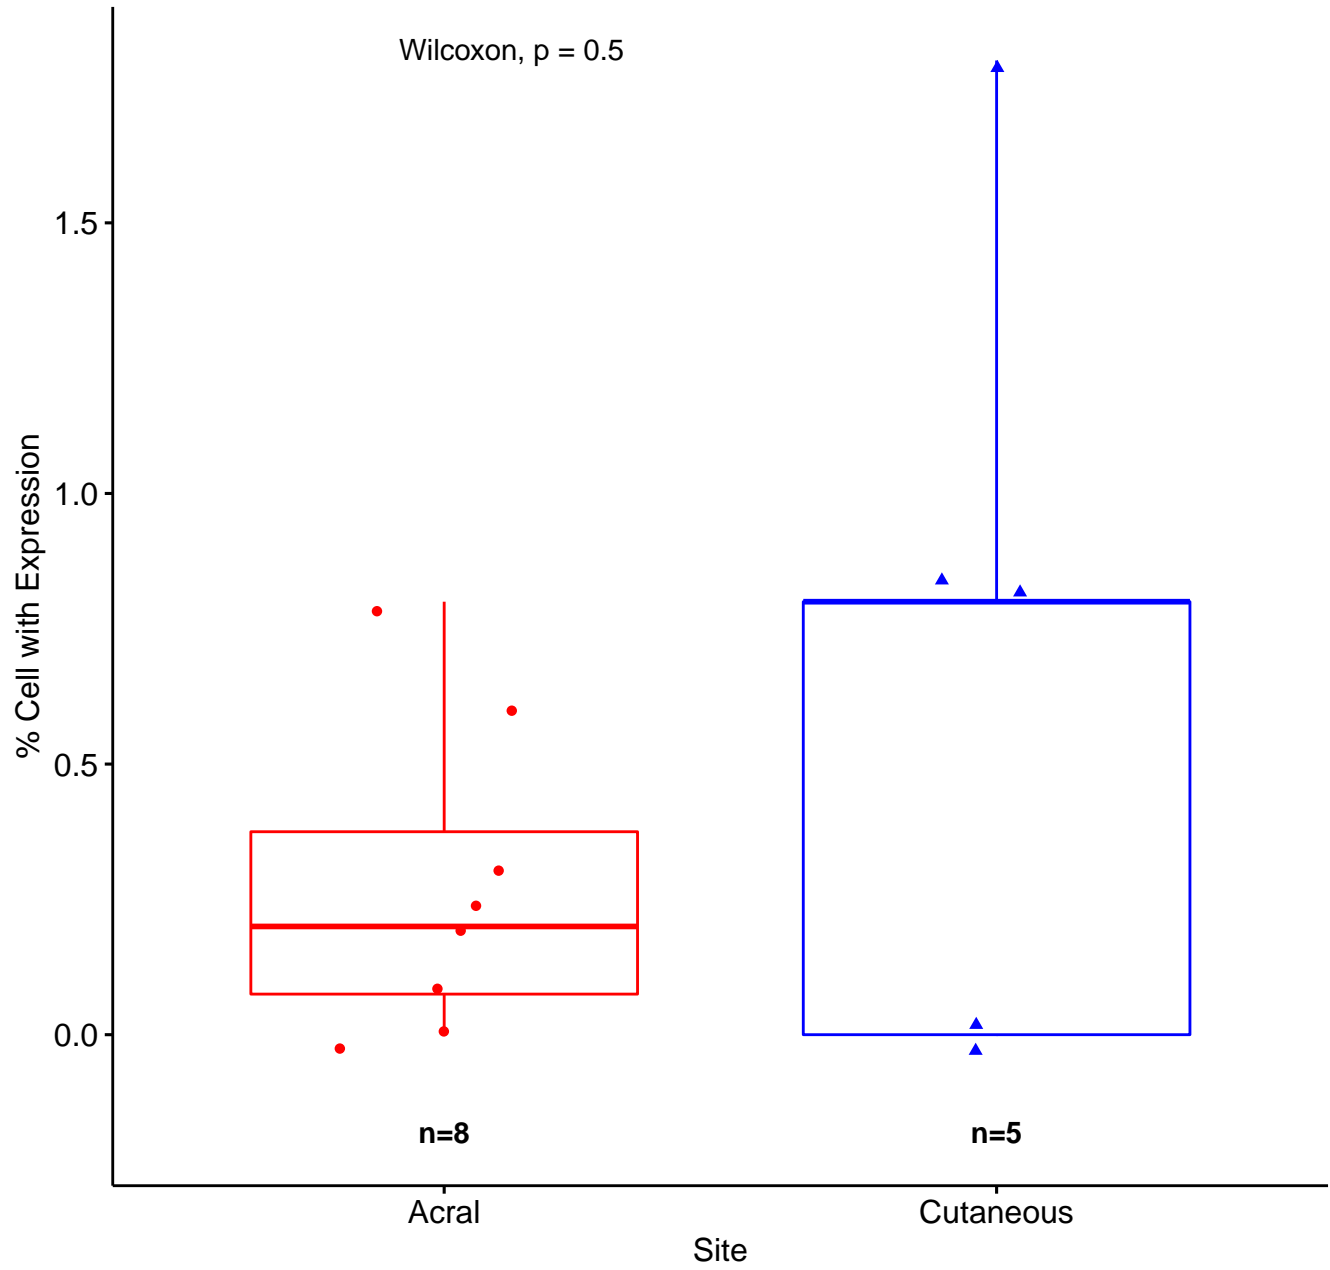

# CTLA4

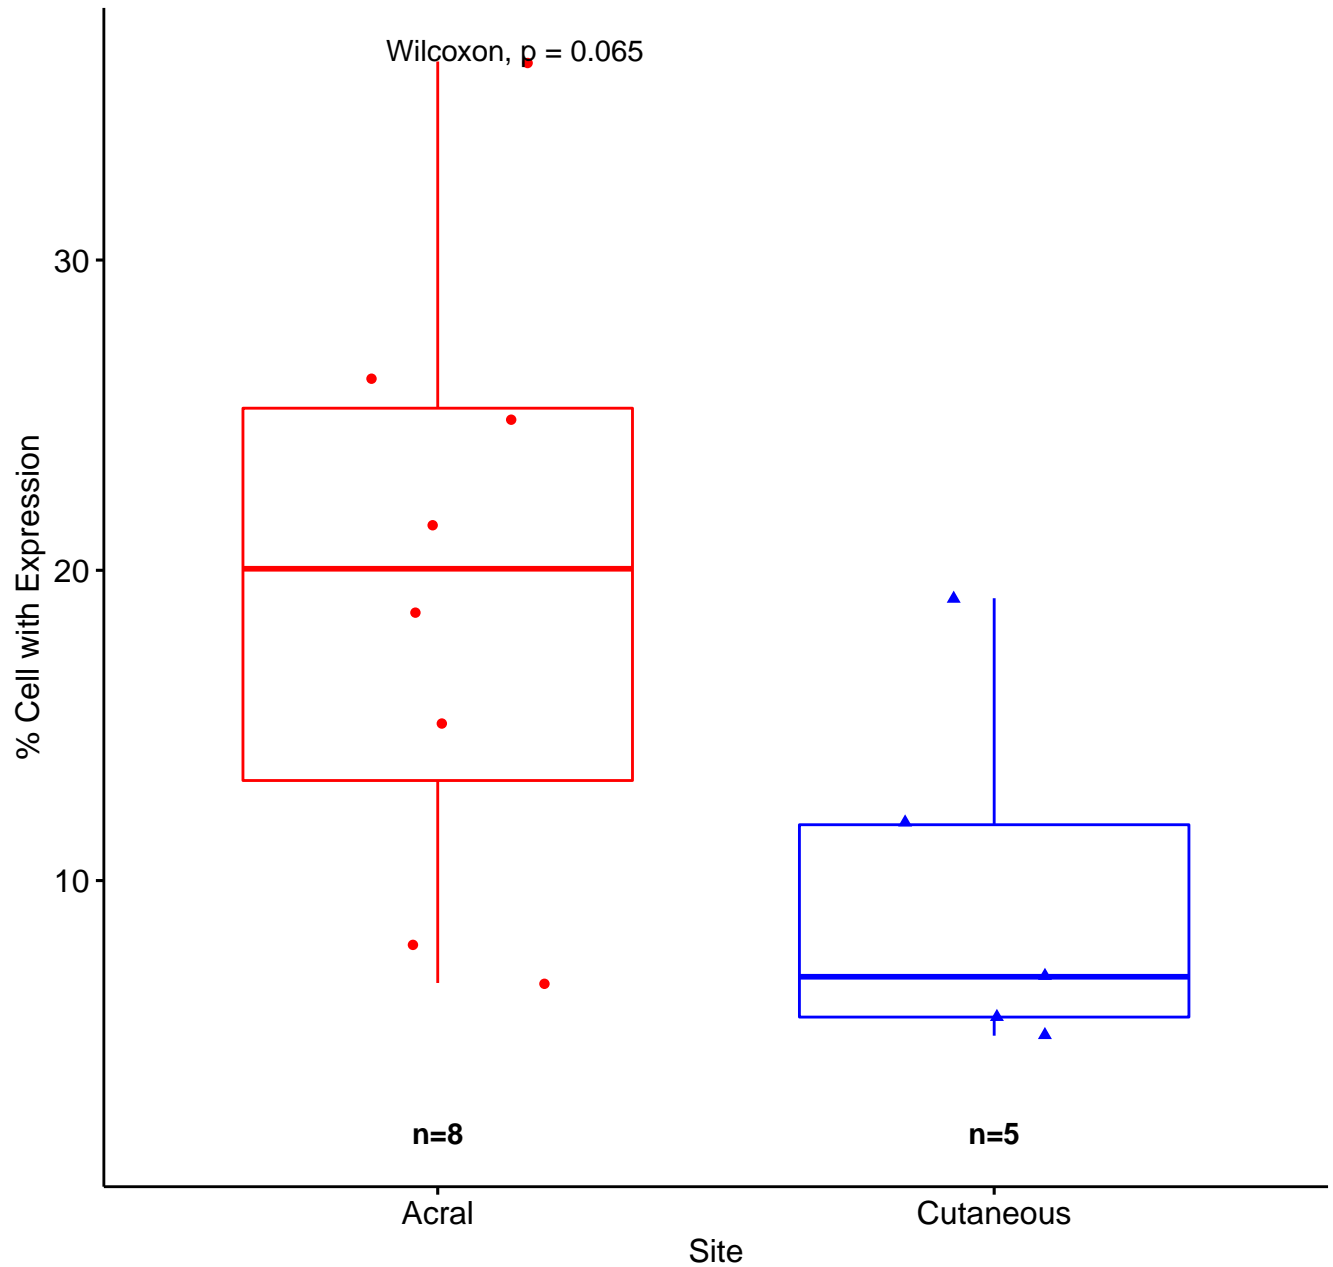

# HAVCR2

Wilcoxon,  $p = 0.0062$

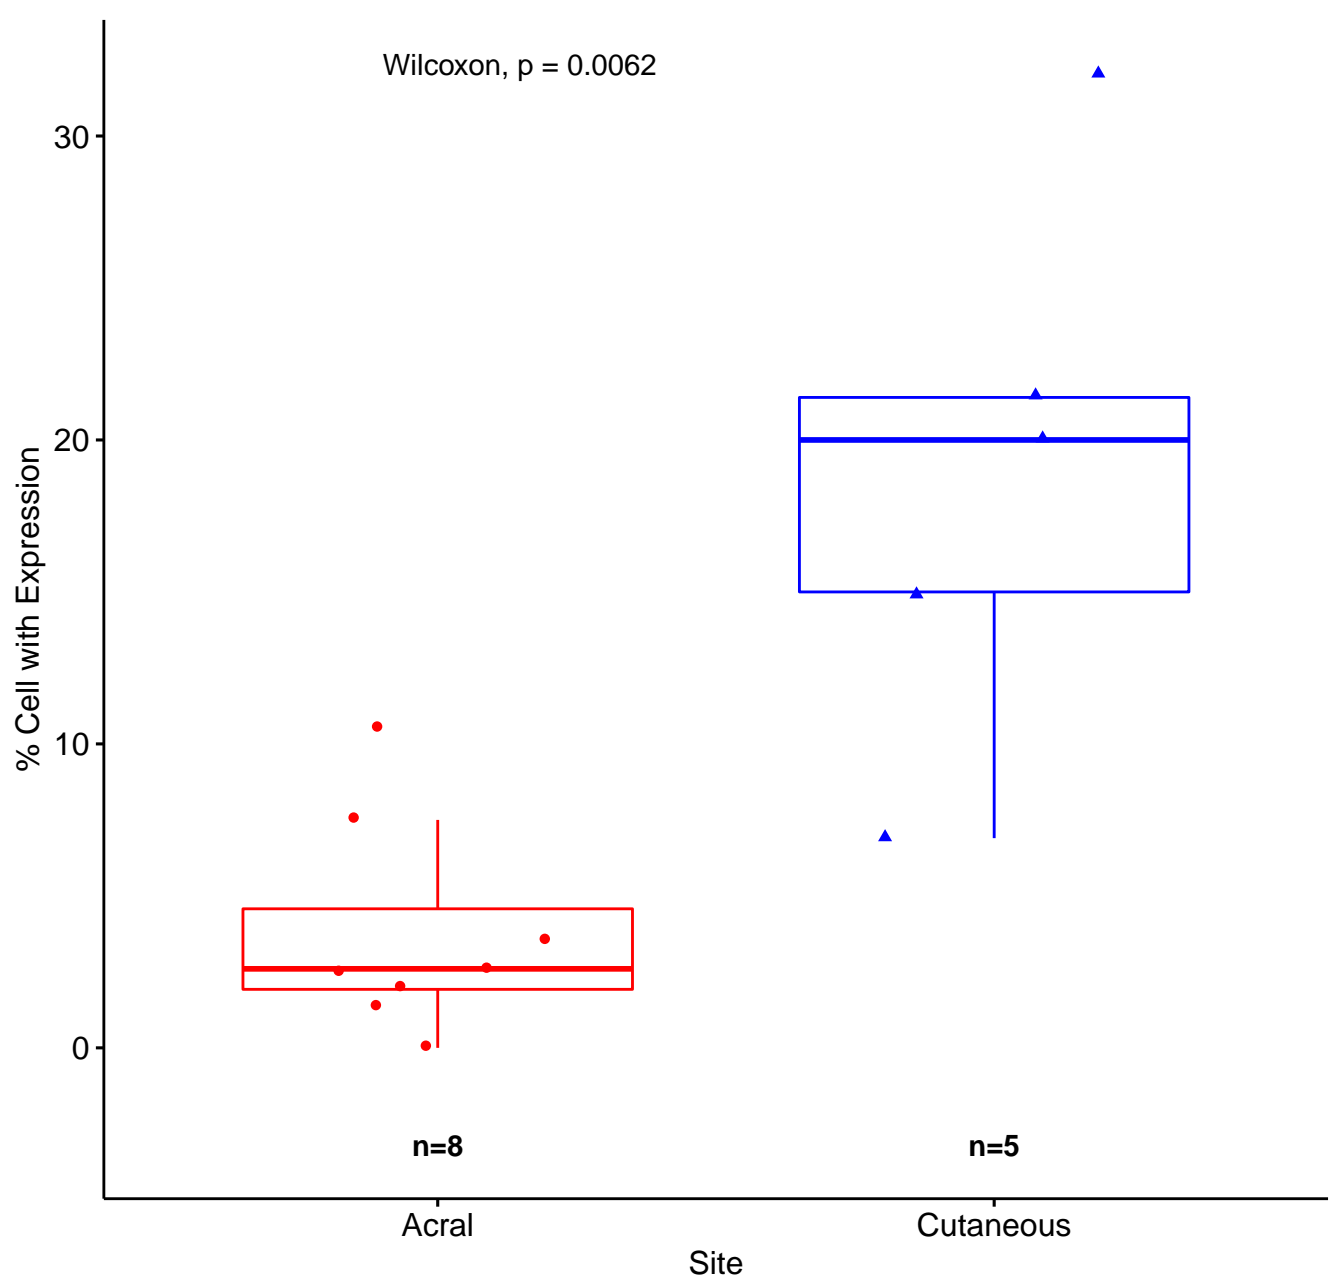

# IDO1

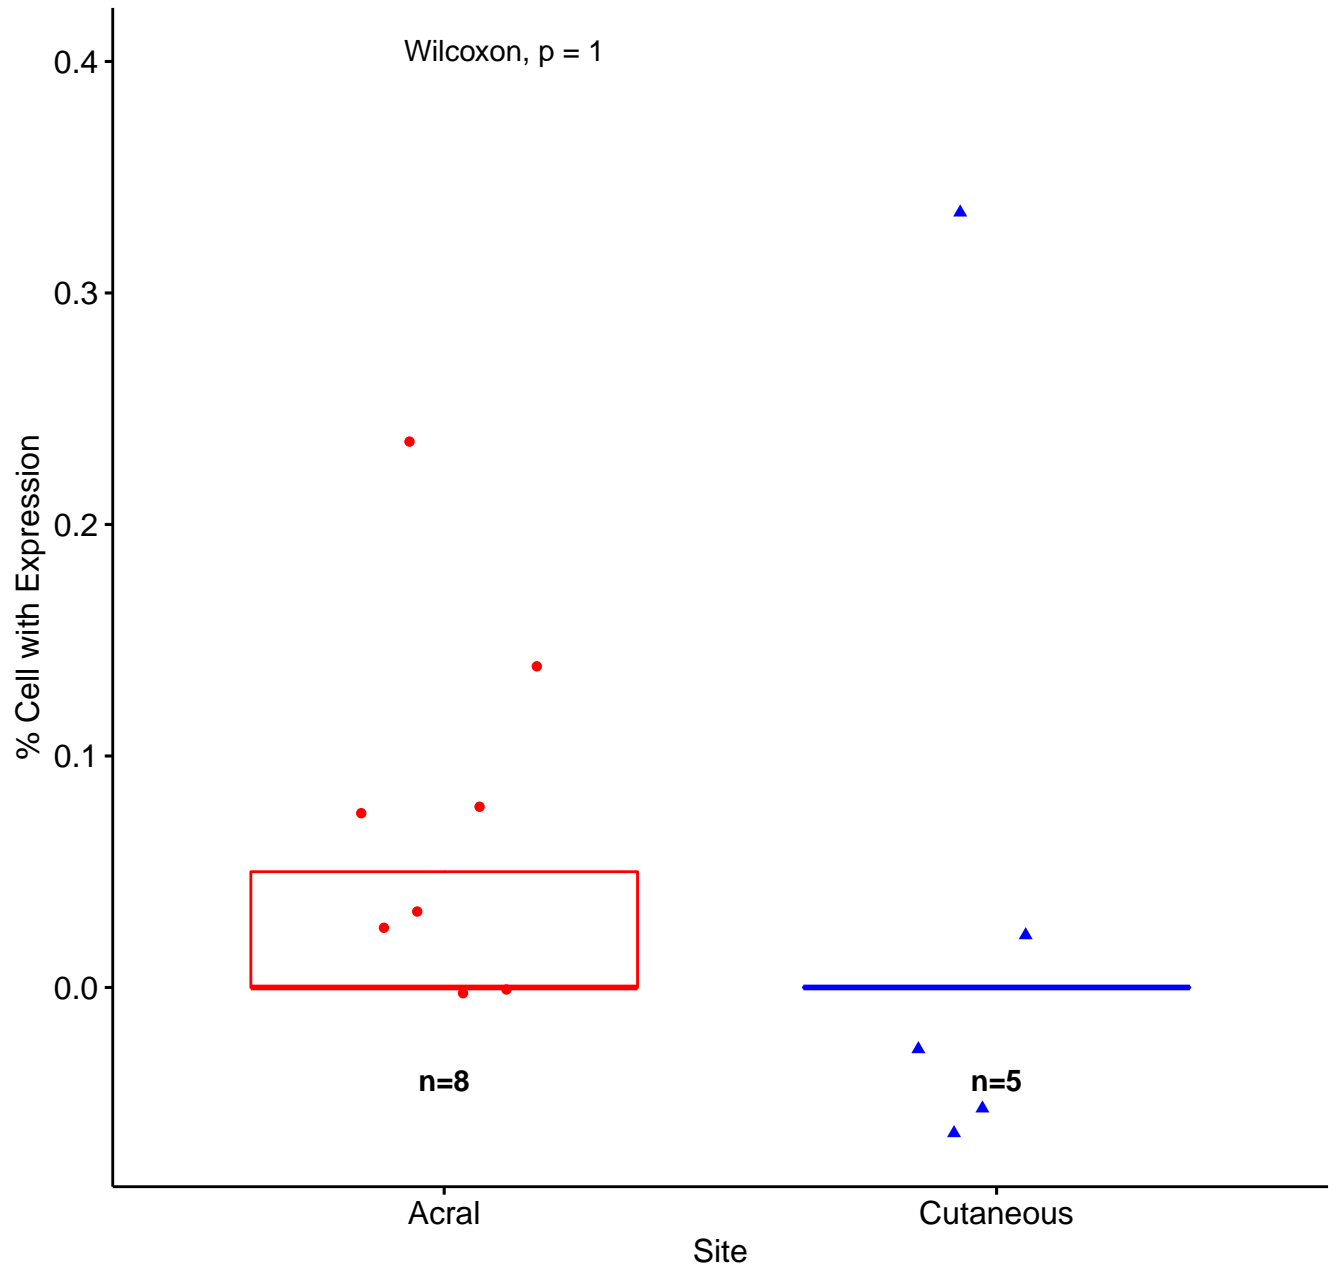

# KIR2DL1

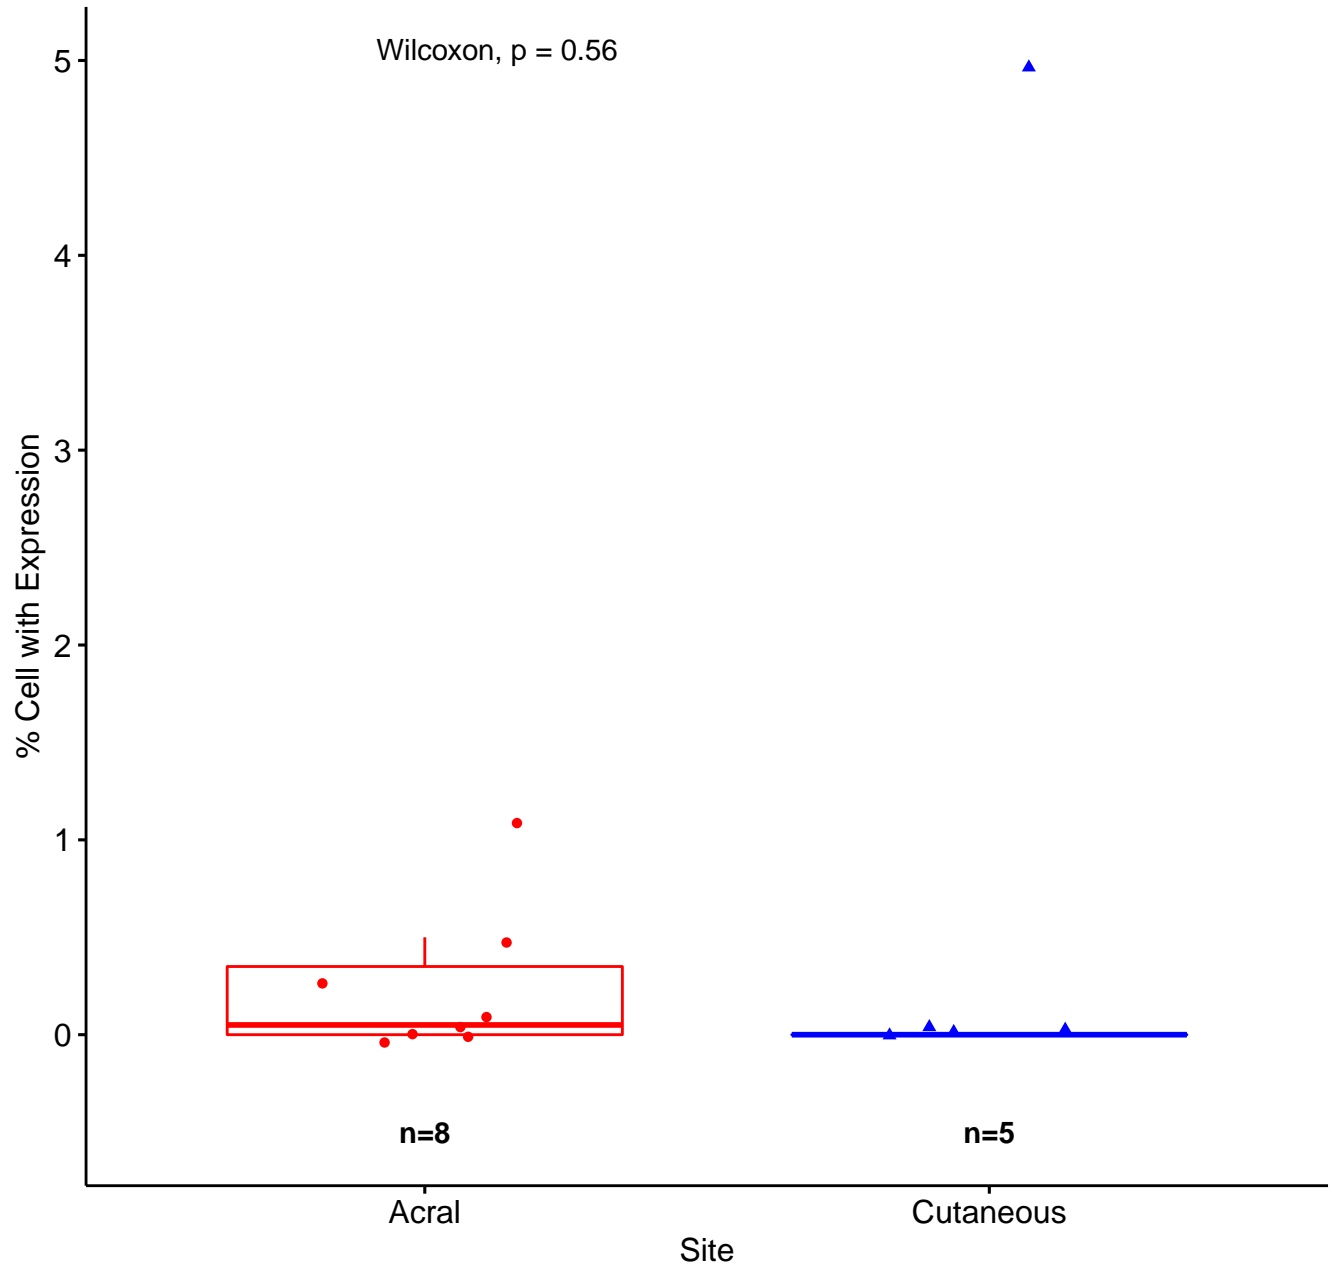

# KIR2DL3

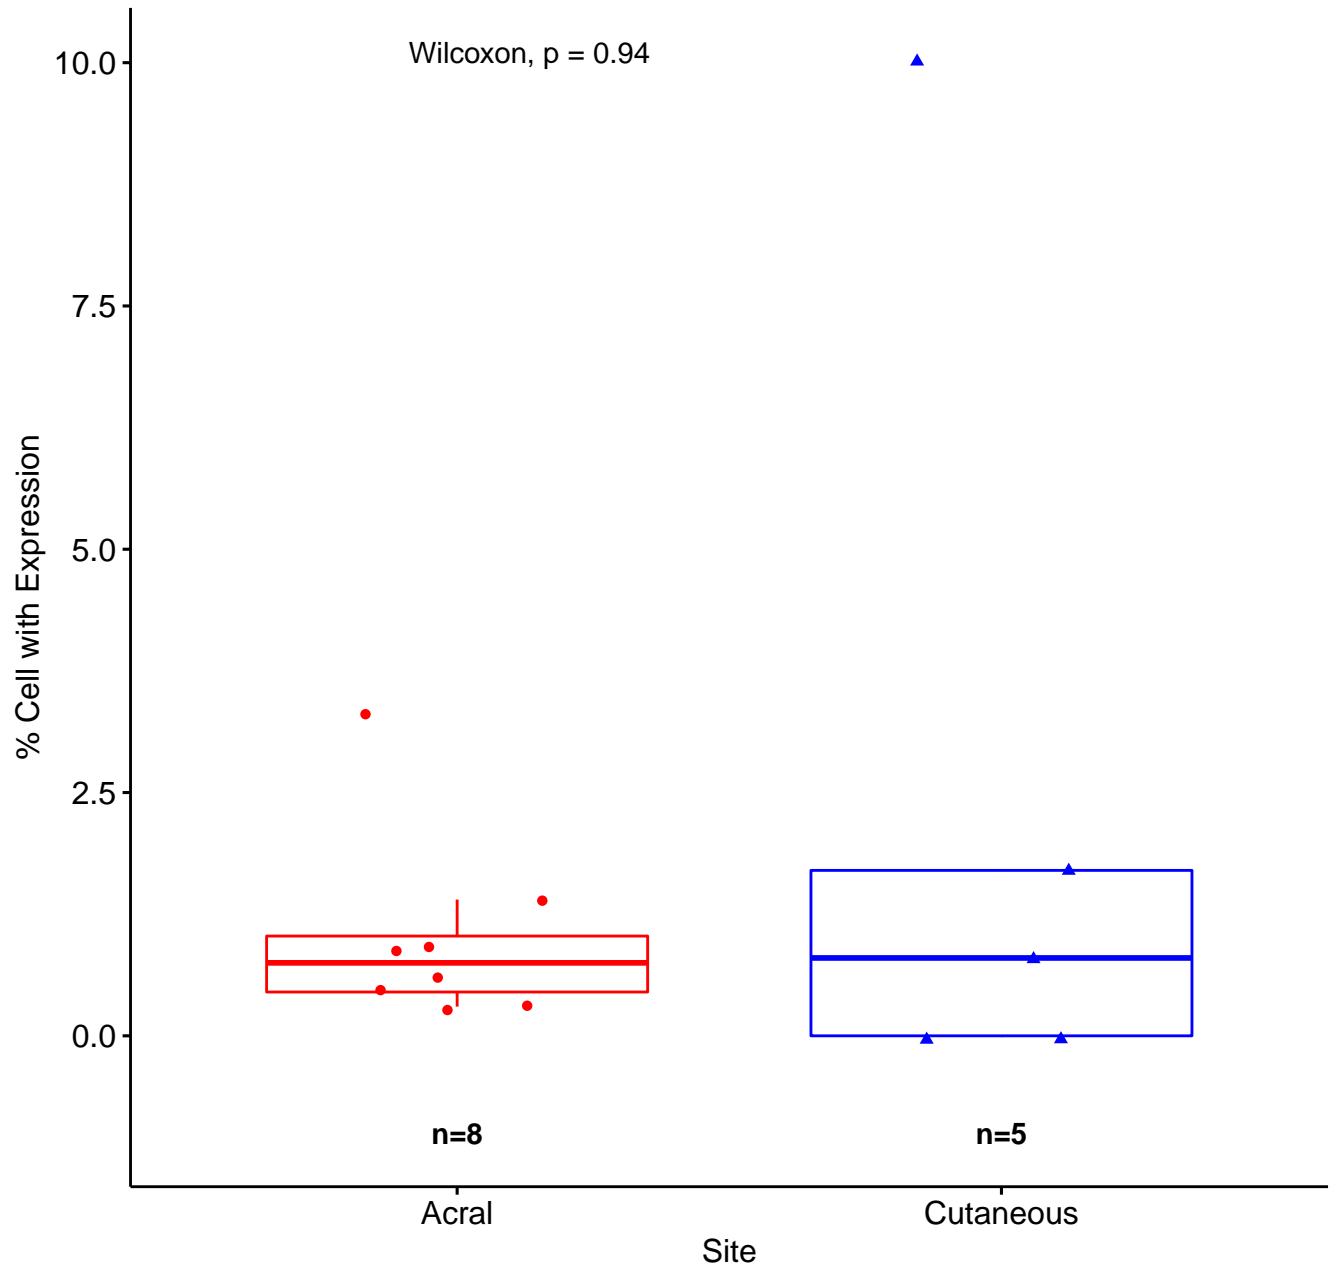

# KIR2DL4

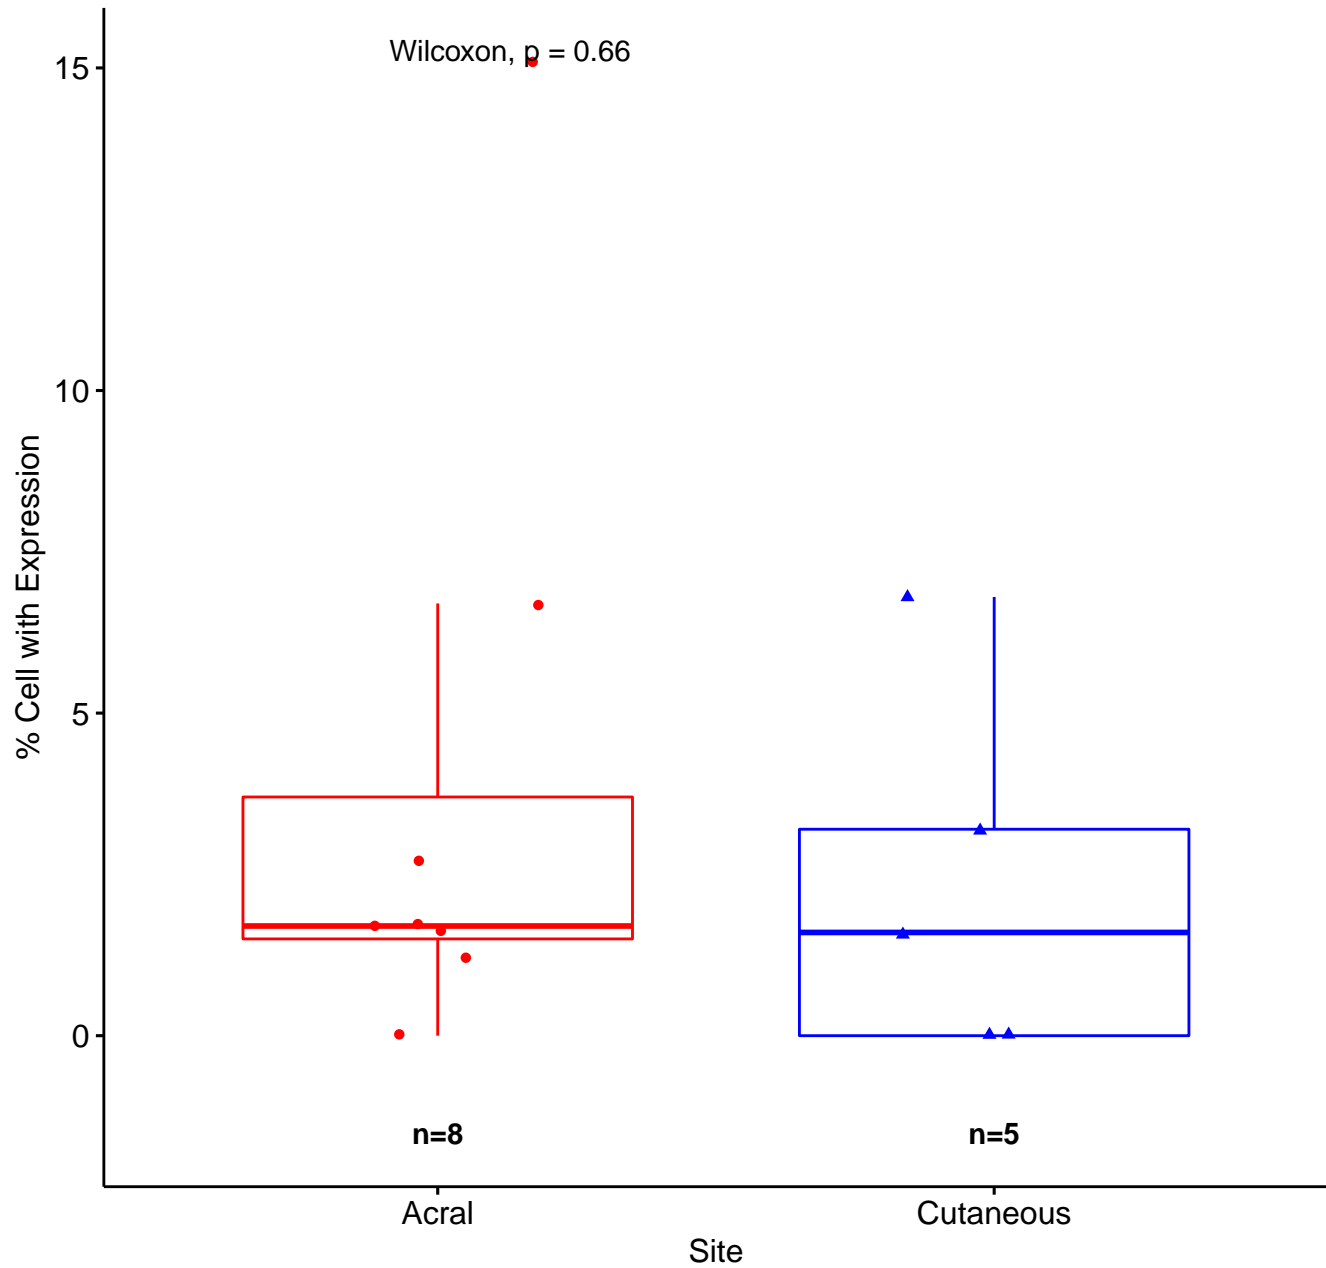

# KIR3DL1

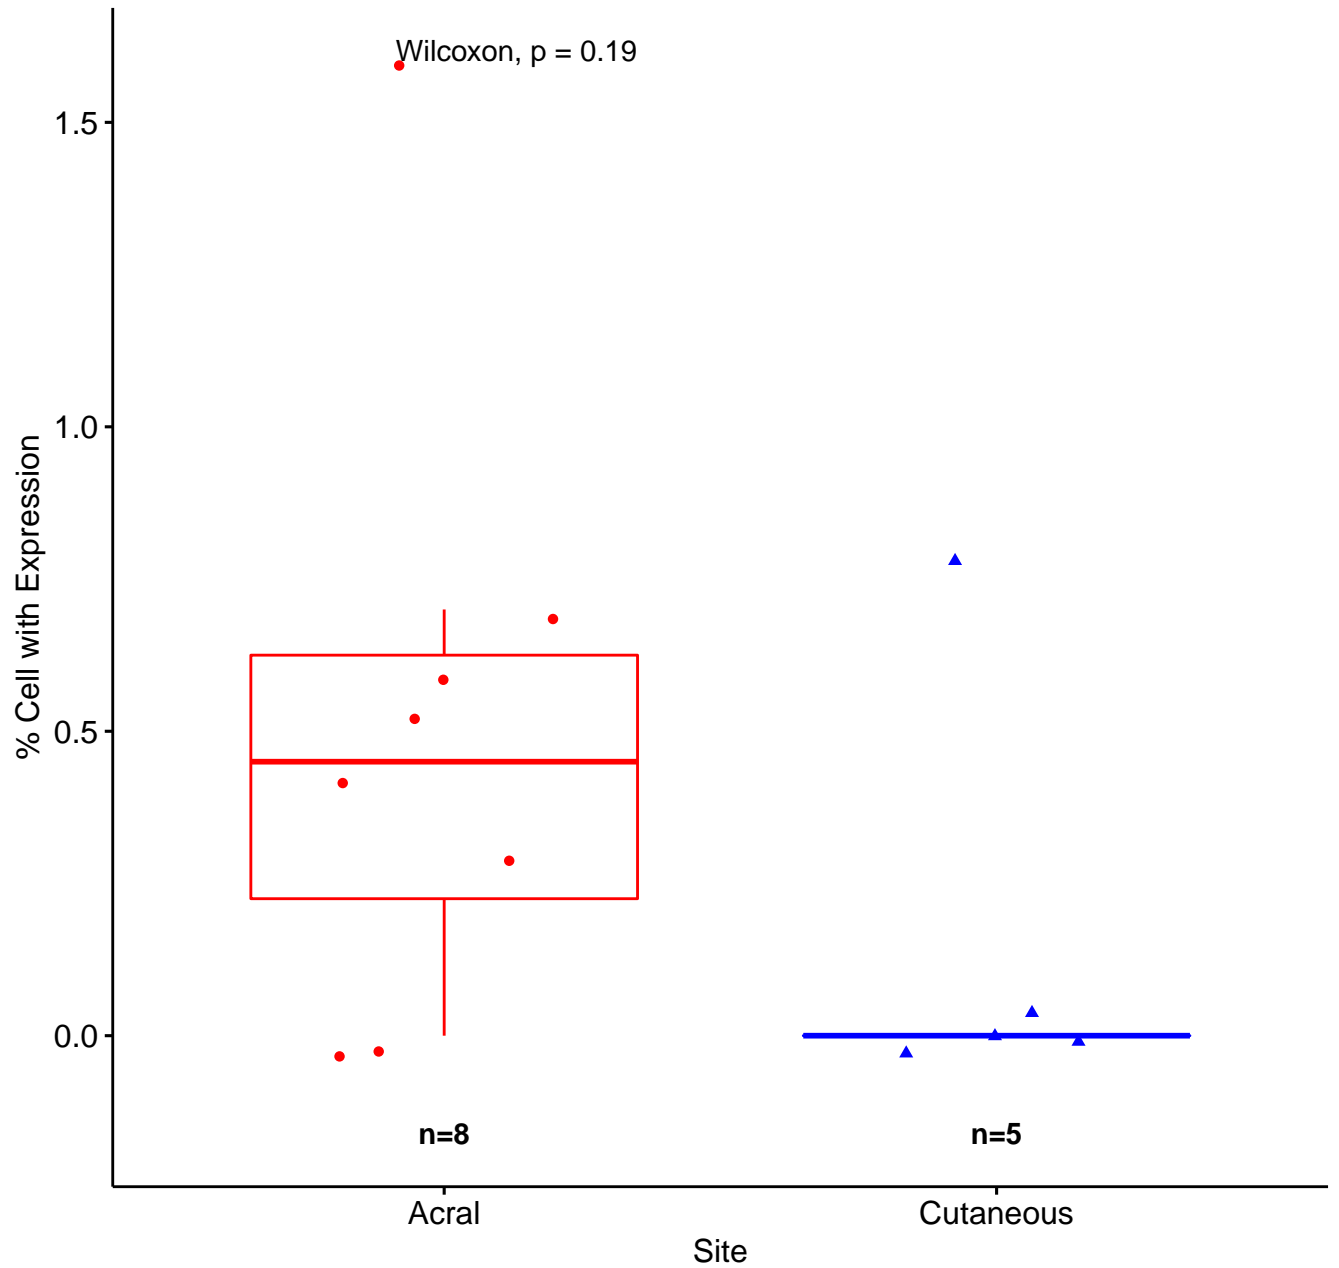



# KIR3DL2

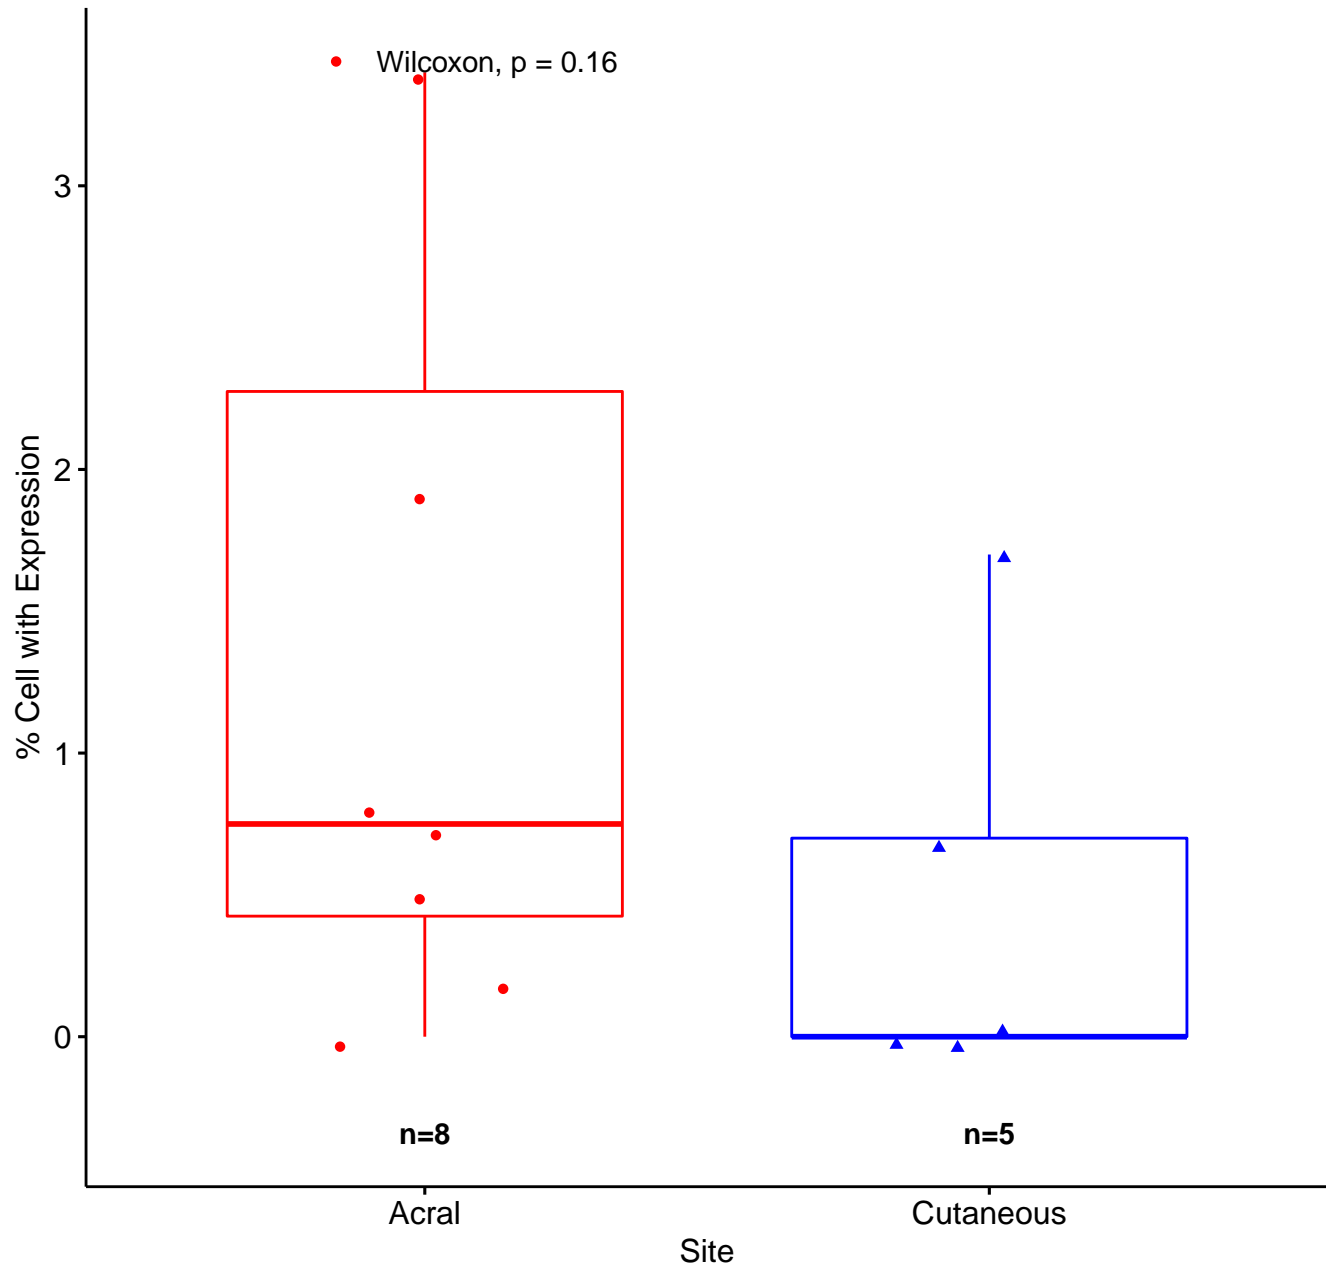

# KIR3DL3

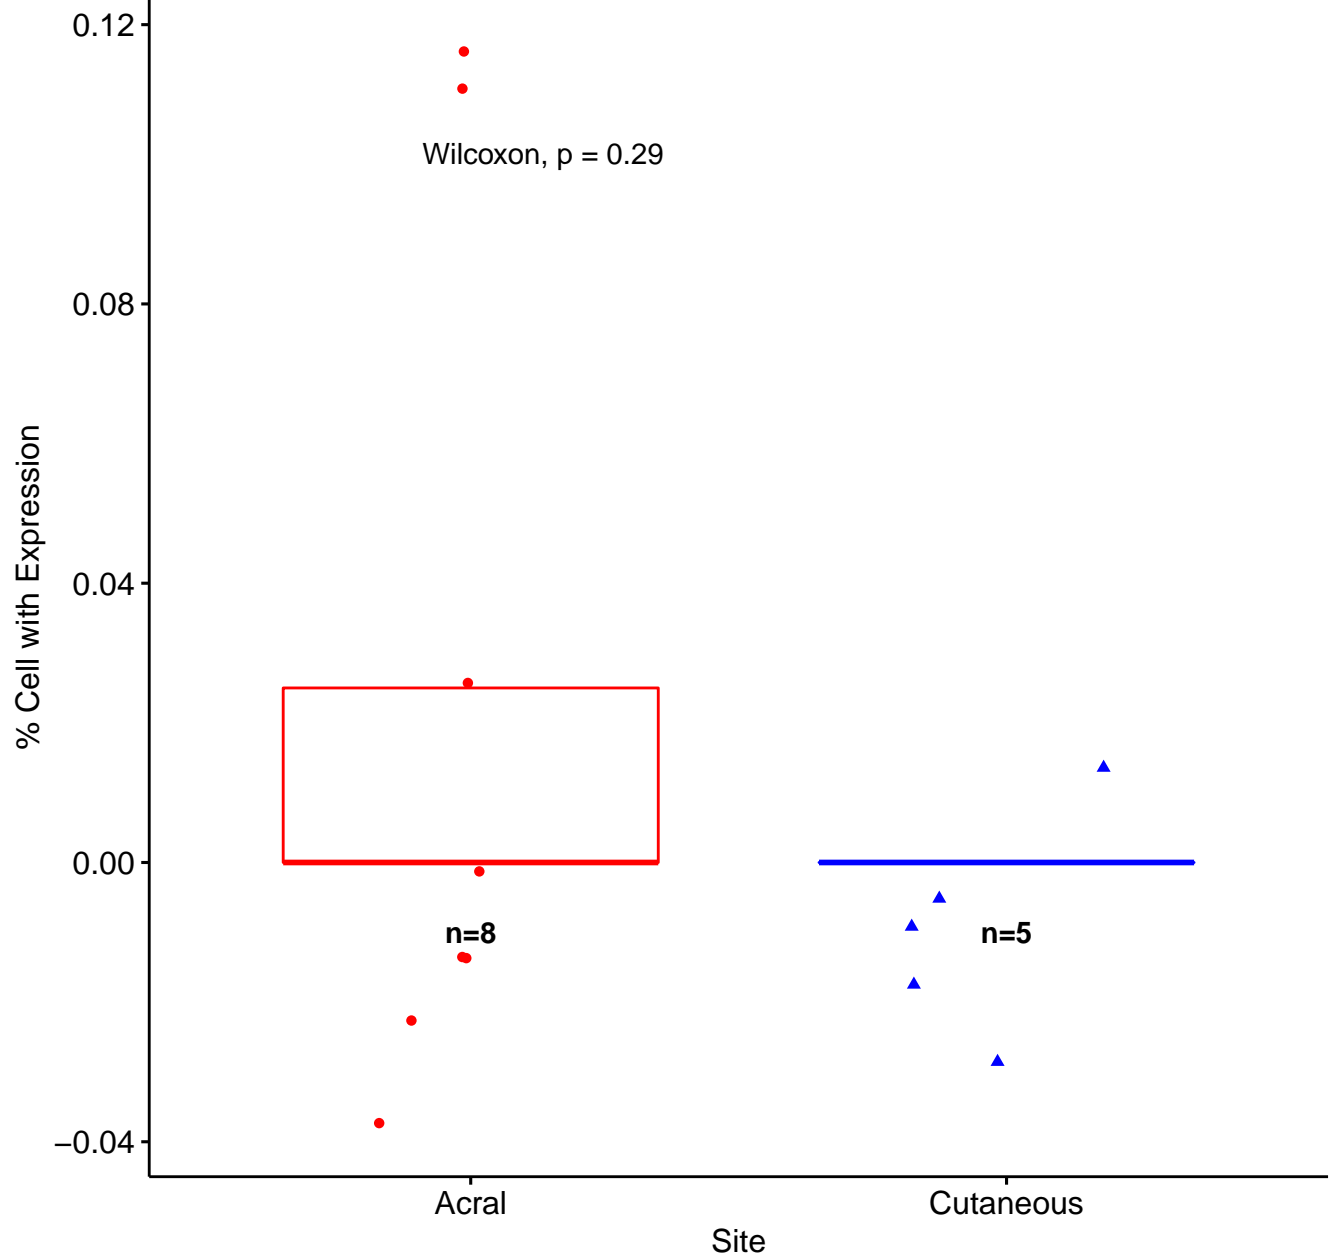

# LAG3

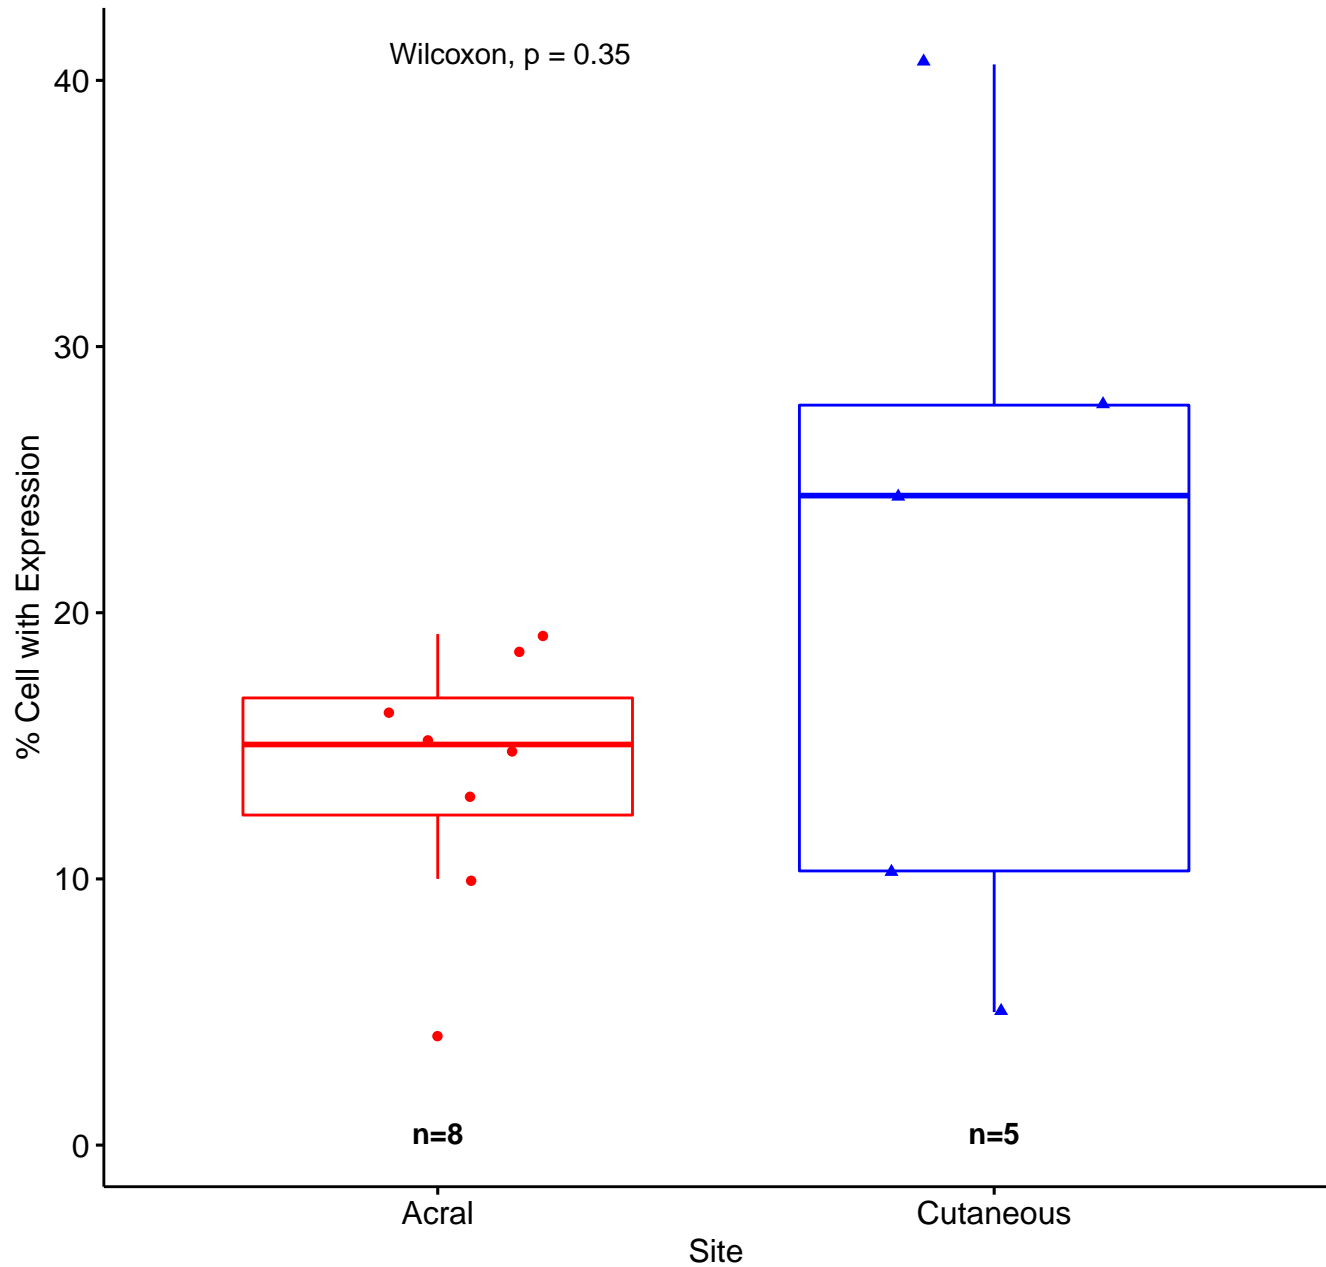

# PDCD1

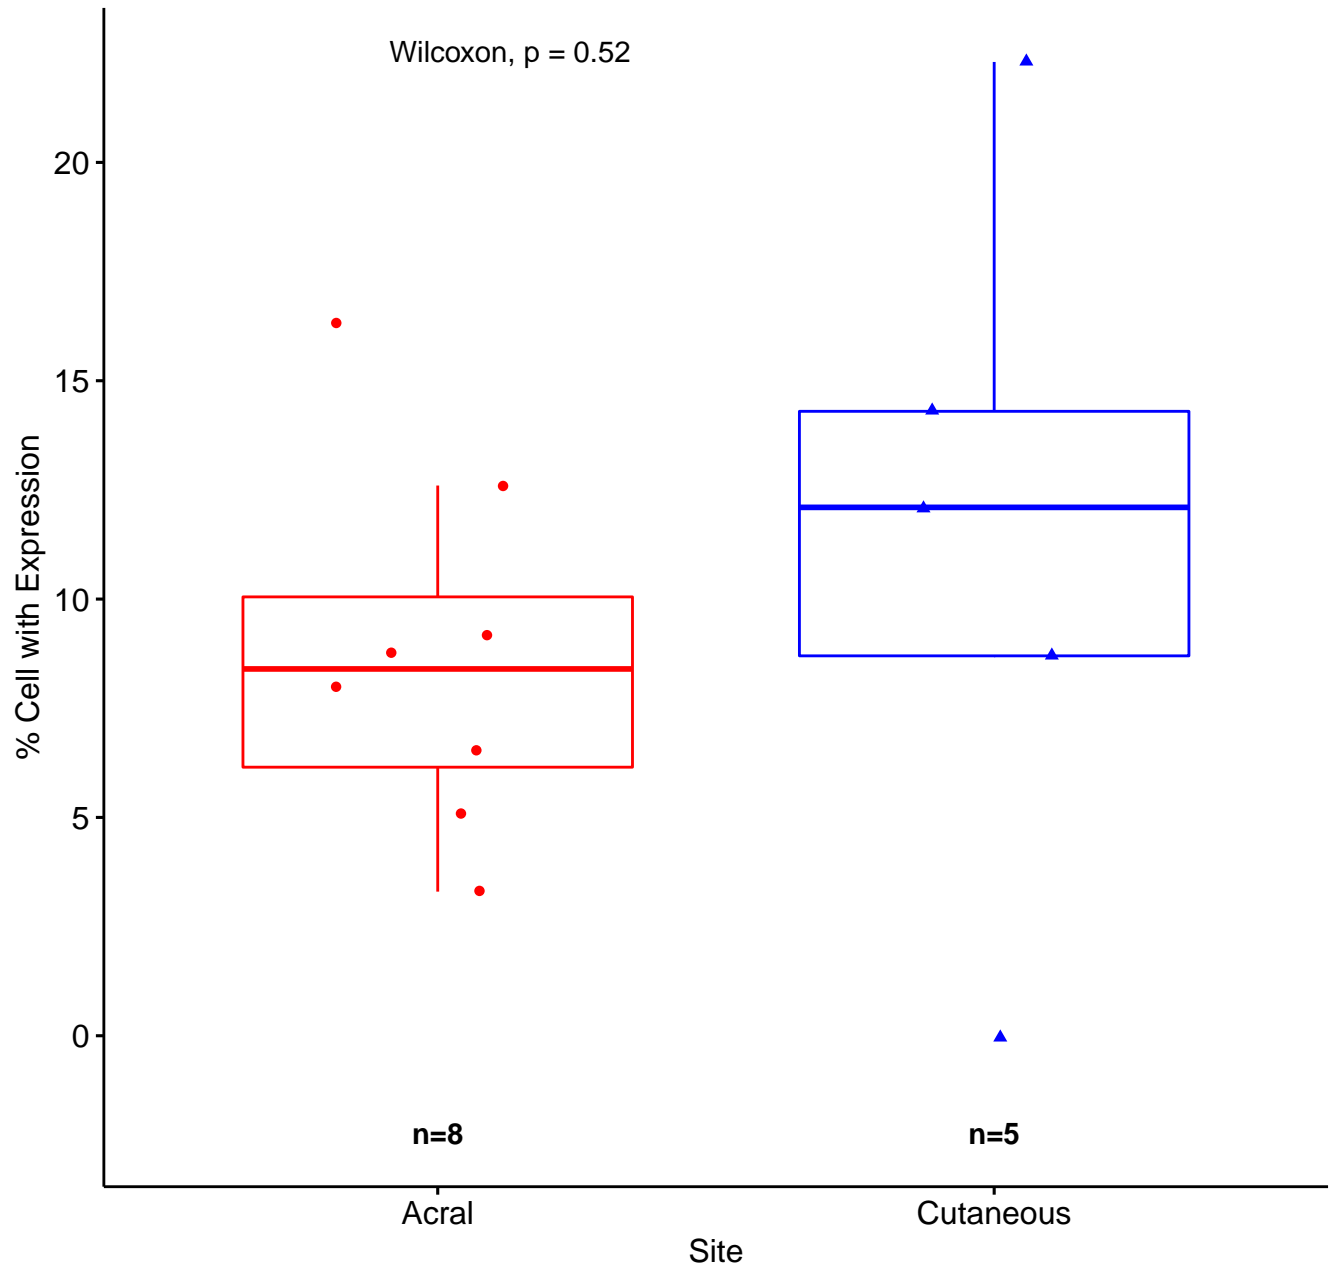

# VSIR

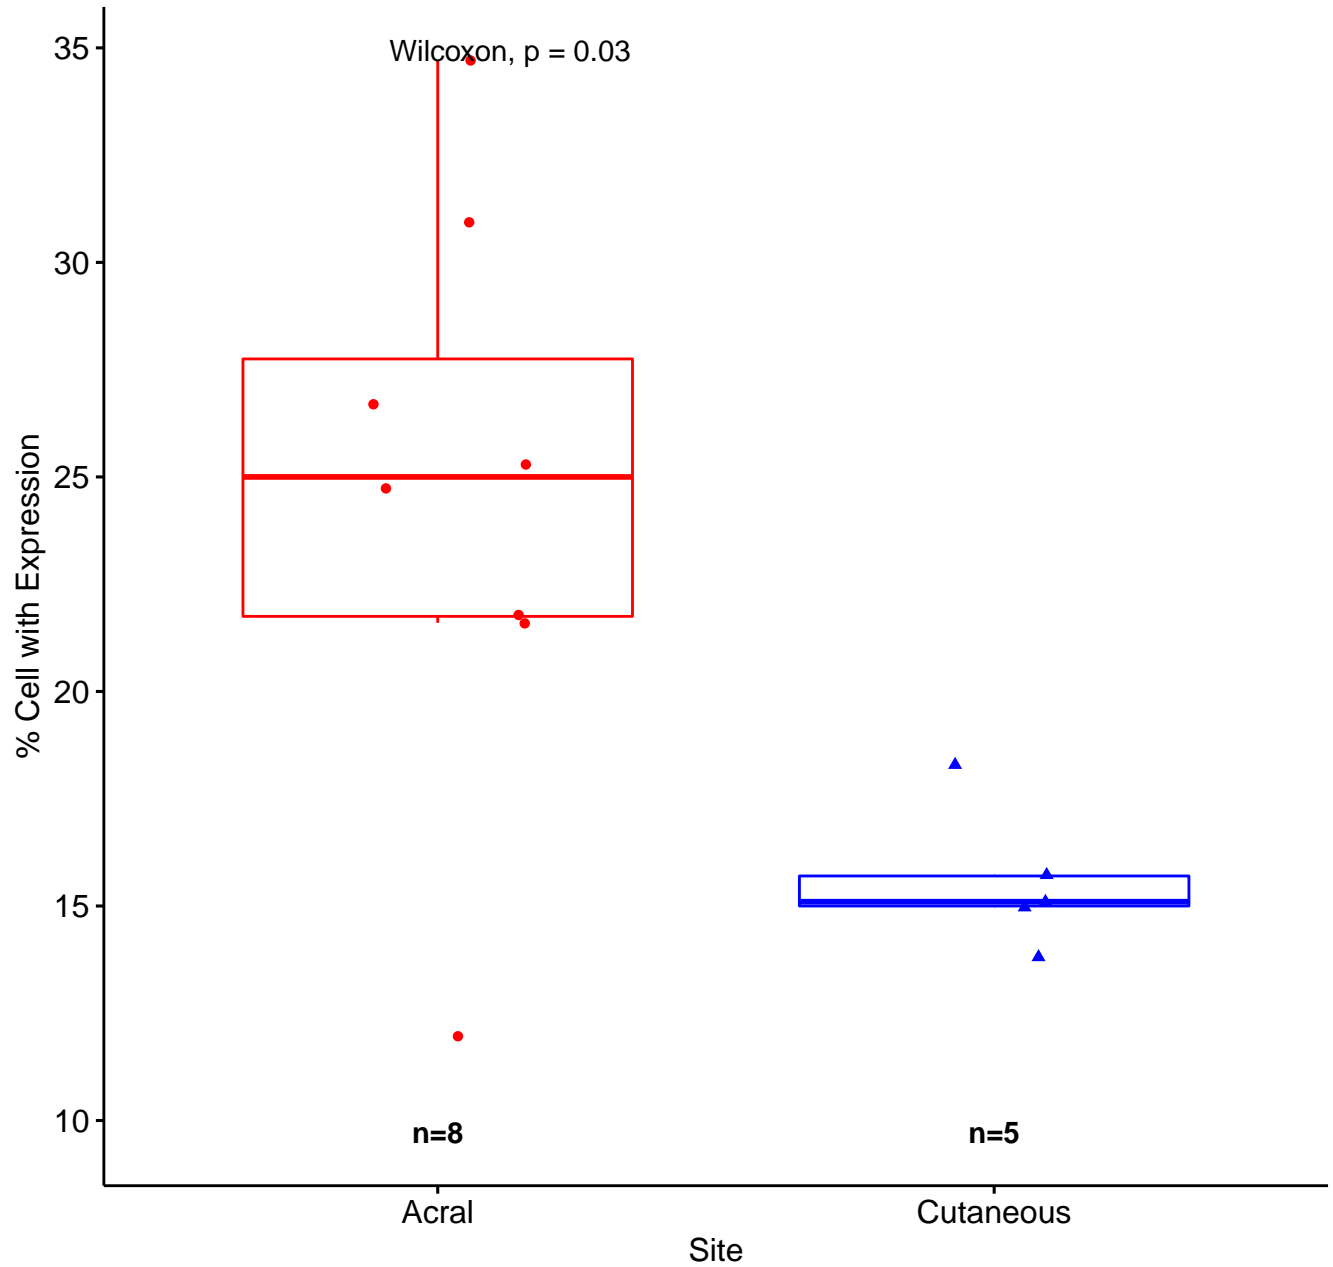

# TIGIT

Wilcoxon,  $p = 0.28$

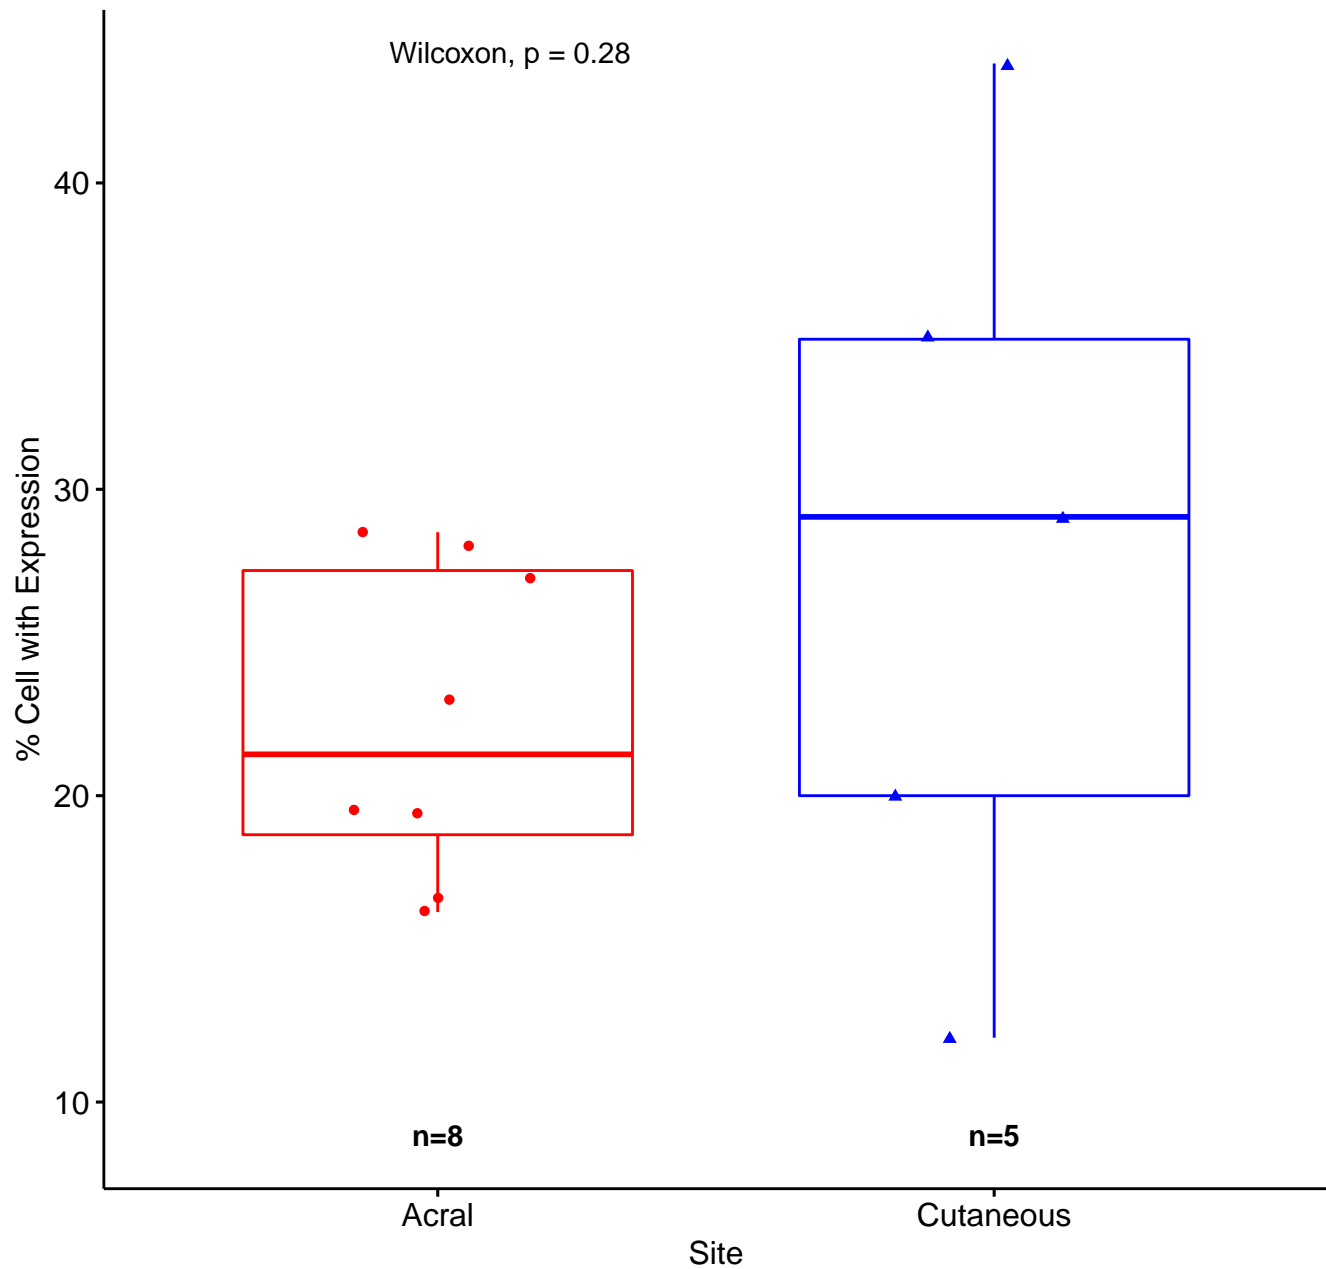

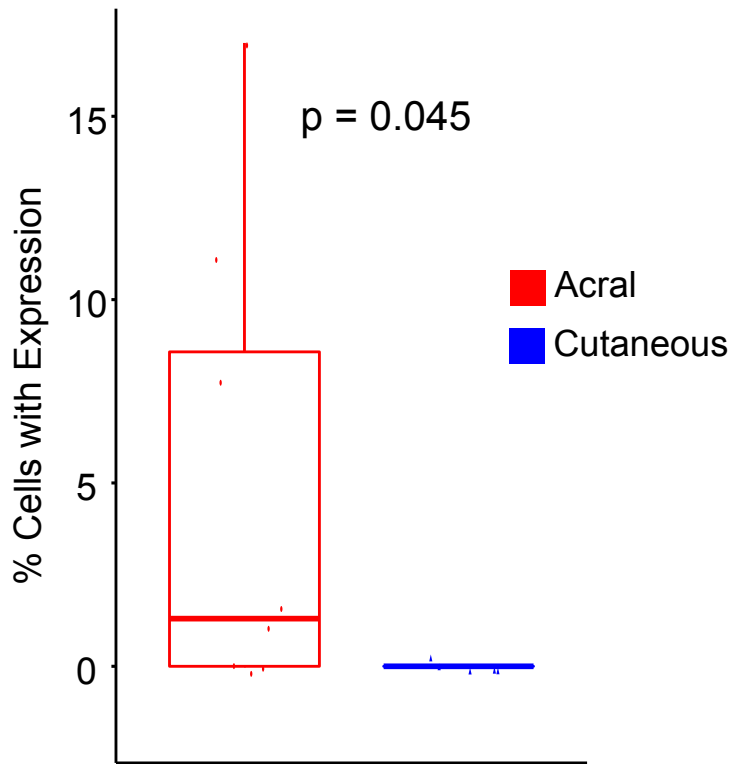

**Supplemental Figure 23.** Boxplot showing expression of NT5E in acral and non-acral cutaneous melanoma cells (Wilcoxon test).

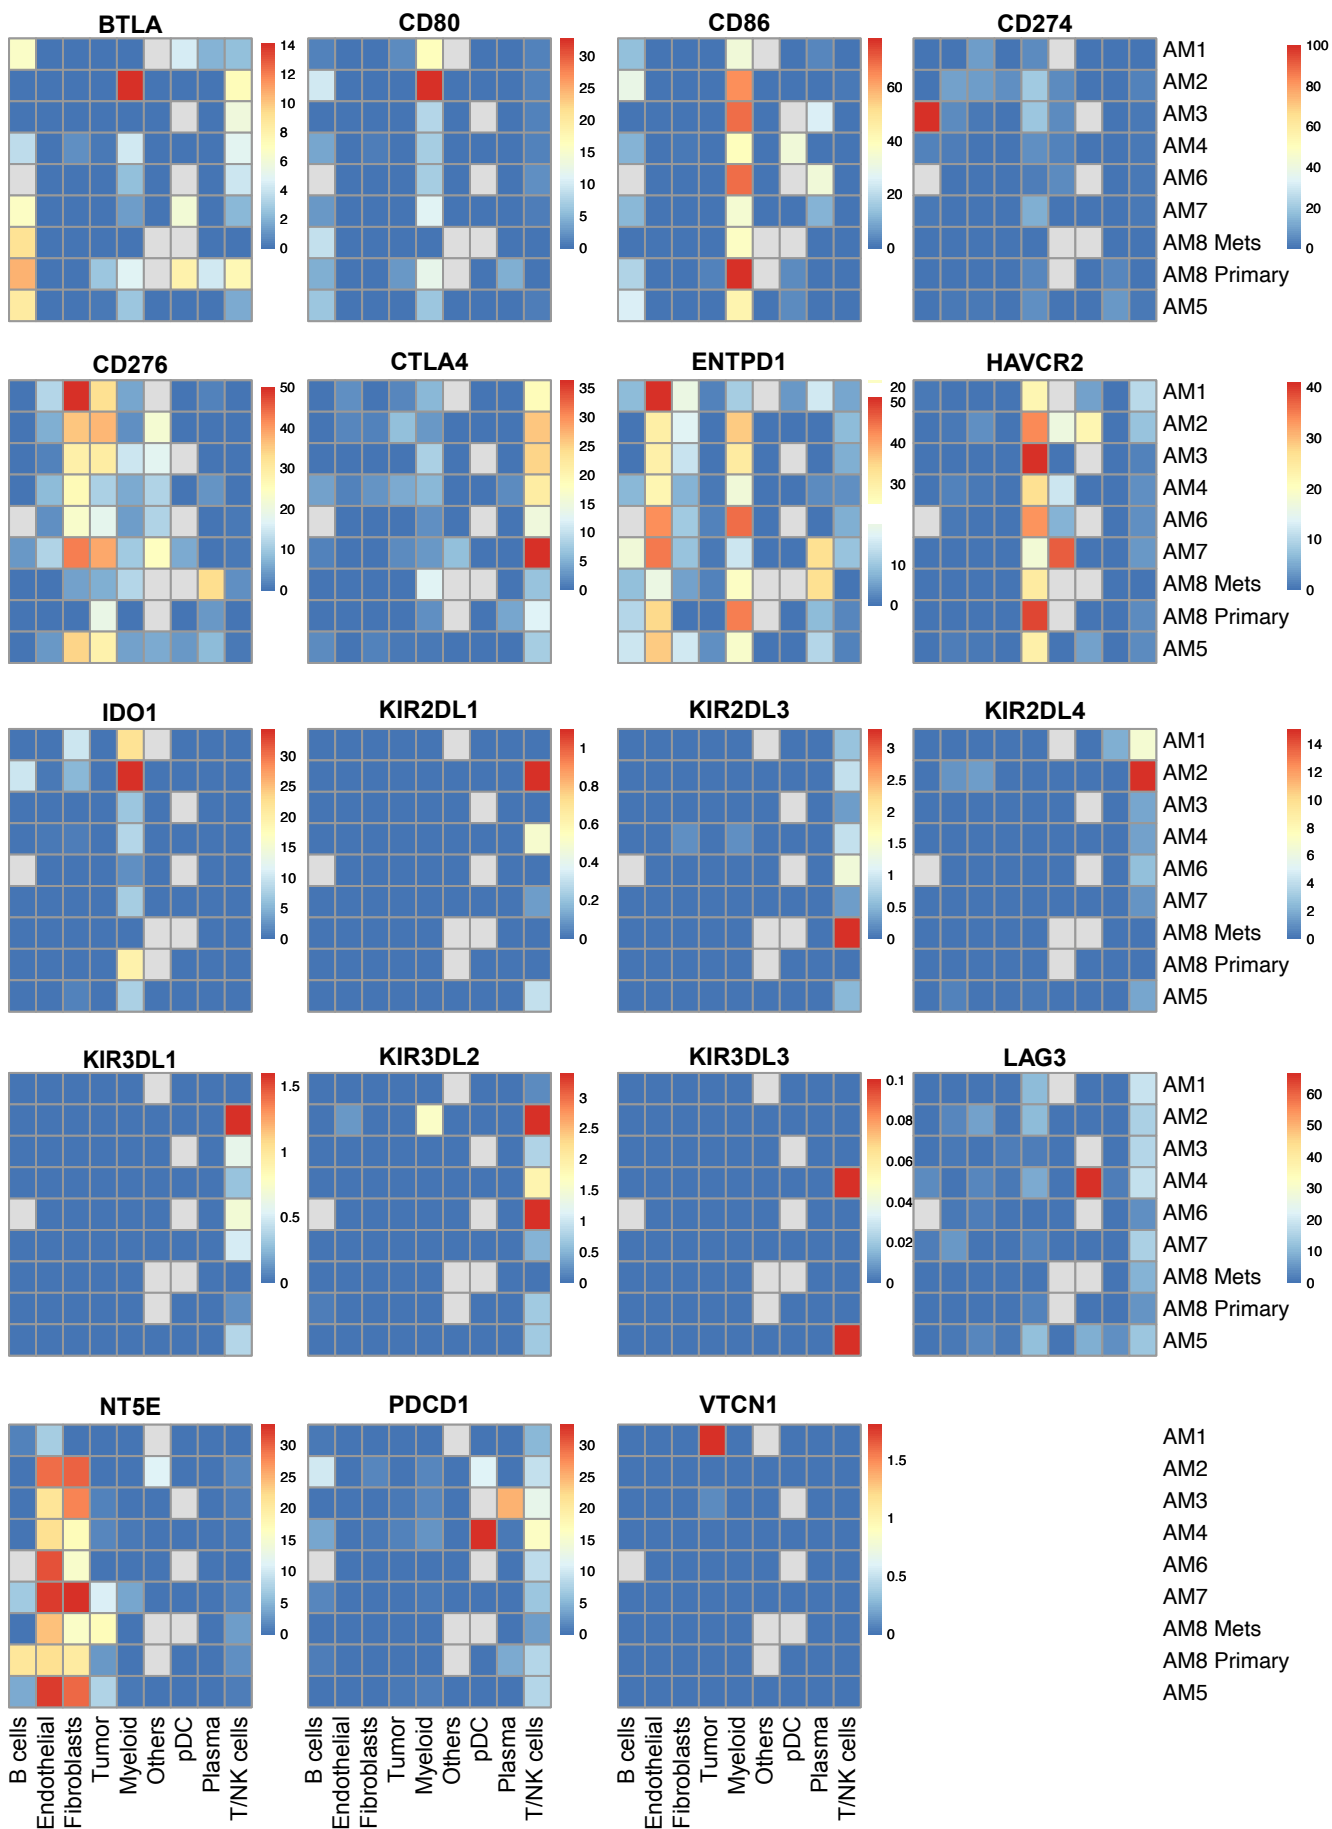

**Supplemental Figure 24.** Heatmaps showing proportion of cells expressing checkpoints across cell types in individual samples of acral melanoma.



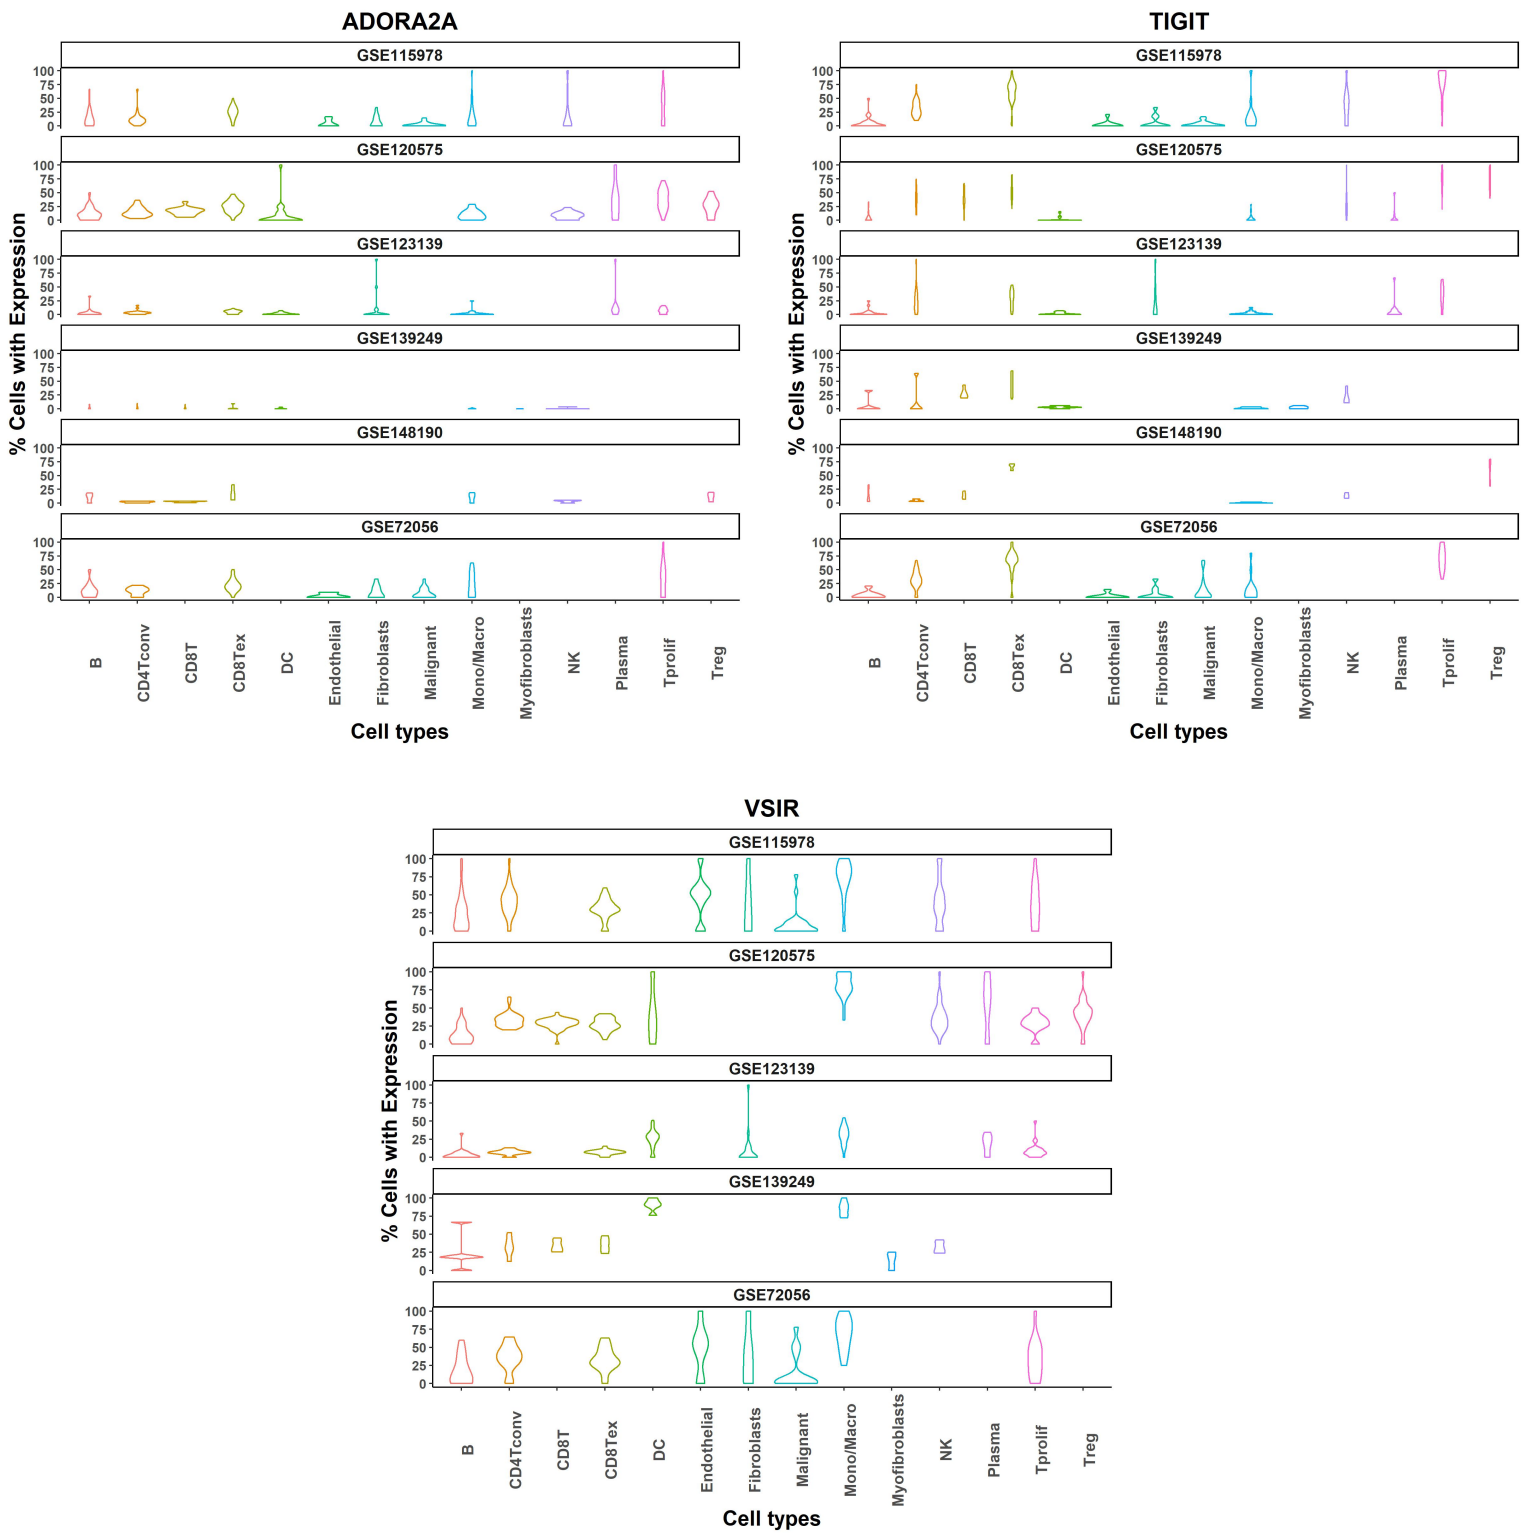

**Supplemental Figure 25.** Violin plots showing expression of checkpoints ADORA2A, TIGIT, and VSIR across six public datasets.
