# Supplementary material
Source: PubMed Central journal article supplement (PMC9106889)
Supplement: NIHMS1788166-supplement-9.pdf [file NIHMS1788166-supplement-9.pdf]

|                  |     |         |        |    |          |          |         |    |
|------------------|-----|---------|--------|----|----------|----------|---------|----|
| Unknown          | NA  | Moffitt | hs37d5 | 1  | 2428480  | 2428480  | +       | 0  |
|                  | SNP | T       | T      | G  | novel    | none     | MOF-MA1 | NA |
|                  | 0   | 0       | 0      | 0  | 0        | 0        | Unknown |    |
| Untested Somatic | NA  | WXS     | none   | 0  | 0        | 0        |         |    |
| ILLUMINA_NextSeq | NA  | NA      | 0      | NA | 0        | 0        | 0       | 0  |
|                  | 0   | 0       | 0      | 0  | 0        | 0        | NA      | NA |
|                  | NA  | NA      | NA     | NA | NA       | NA       | NA      | NA |
|                  | NA  | NA      | NA     | NA | NA       | NA       | NA      | NA |
|                  | NA  | NA      | NA     | NA | NA       | NA       | NA      | NA |
|                  | NA  | NA      | NA     | NA | NA       | NA       | 0       | NA |
|                  | NA  | NA      | NA     | NA | NA       | 0        | 0       | NA |
|                  | NA  | NA      | NA     | NA | NA       | NA       | NA      | NA |
|                  | NA  | NA      | NA     | NA | NA       | NA       | NA      | NA |
|                  | NA  | NA      | NA     | NA | NA       | NA       | NA      | NA |
|                  | NA  | NA      | NA     | NA | NA       | NA       | NA      | NA |
|                  | NA  | NA      | NA     | NA | NA       | NA       | 0       | NA |
| Unknown          | NA  | Moffitt | hs37d5 | 1  | 7812683  | 7812683  | +       | 0  |
|                  | SNP | T       | T      | G  | novel    | none     | MOF-MA1 | NA |
|                  | 0   | 0       | 0      | 0  | 0        | 0        | Unknown |    |
| Untested Somatic | NA  | WXS     | none   | 0  | 0        | 0        |         |    |
| ILLUMINA_NextSeq | NA  | NA      | 0      | NA | 0        | 0        | 0       | 0  |
|                  | 0   | 0       | 0      | 0  | 0        | 0        | NA      | NA |
|                  | NA  | NA      | NA     | NA | NA       | NA       | NA      | NA |
|                  | NA  | NA      | NA     | NA | NA       | NA       | NA      | NA |
|                  | NA  | NA      | NA     | NA | NA       | NA       | NA      | NA |
|                  | NA  | NA      | NA     | NA | NA       | NA       | NA      | NA |
|                  | NA  | NA      | NA     | NA | NA       | NA       | 0       | NA |
|                  | NA  | NA      | NA     | NA | NA       | 0        | 0       | NA |
|                  | NA  | NA      | NA     | NA | NA       | NA       | NA      | NA |
|                  | NA  | NA      | NA     | NA | NA       | NA       | NA      | NA |
|                  | NA  | NA      | NA     | NA | NA       | NA       | NA      | NA |
|                  | NA  | NA      | NA     | NA | NA       | NA       | NA      | NA |
|                  | NA  | NA      | NA     | NA | NA       | NA       | 0       | NA |
| Unknown          | NA  | Moffitt | hs37d5 | 1  | 7826645  | 7826645  | +       | 0  |
|                  | SNP | G       | G      | A  | novel    | none     | MOF-AM2 | NA |
|                  | 0   | 0       | 0      | 0  | 0        | 0        | Unknown |    |
| Untested Somatic | NA  | WXS     | none   | 0  | 0        | 0        |         |    |
| ILLUMINA_NextSeq | NA  | NA      | 0      | NA | 0        | 0        | 0       | 0  |
|                  | 0   | 0       | 0      | 0  | 0        | 0        | NA      | NA |
|                  | NA  | NA      | NA     | NA | NA       | NA       | NA      | NA |
|                  | NA  | NA      | NA     | NA | NA       | NA       | NA      | NA |
|                  | NA  | NA      | NA     | NA | NA       | NA       | NA      | NA |
|                  | NA  | NA      | NA     | NA | NA       | NA       | NA      | NA |
|                  | NA  | NA      | NA     | NA | NA       | NA       | 0       | NA |
|                  | NA  | NA      | NA     | NA | NA       | 0        | 0       | NA |
|                  | NA  | NA      | NA     | NA | NA       | NA       | NA      | NA |
|                  | NA  | NA      | NA     | NA | NA       | NA       | NA      | NA |
|                  | NA  | NA      | NA     | NA | NA       | NA       | NA      | NA |
|                  | NA  | NA      | NA     | NA | NA       | NA       | NA      | NA |
|                  | NA  | NA      | NA     | NA | NA       | NA       | 0       | NA |
| Unknown          | NA  | Moffitt | hs37d5 | 1  | 10396532 | 10396532 | +       | 0  |
|                  | SNP | C       | C      | T  | novel    | none     | MOF-MA1 | NA |
|                  | 0   | 0       | 0      | 0  | 0        | 0        | Unknown |    |
| Untested Somatic | NA  | WXS     | none   | 0  | 0        | 0        |         |    |
| ILLUMINA_NextSeq | NA  | NA      | 0      | NA | 0        | 0        | 0       | 0  |





|                   |                  |                  |        |      |                   |            |         |    |
|-------------------|------------------|------------------|--------|------|-------------------|------------|---------|----|
| Unknown           | NA               | NA               | NA     | NA   | NA                | NA         | 0       |    |
|                   | NA               | Moffitt          | hs37d5 | 1    | 24768501          | 24768501 + |         | 0  |
|                   | SNP              | T                | T      | C    | novel             | none       | MOF-AM5 | NA |
|                   | 0                | 0                | 0      | 0    | 0                 | 0          | Unknown |    |
| Untested Somatic  | NA               | NA               | WXS    | none | 0                 | 0          |         |    |
| Illumina_NextSeq  | NA               | NA               | NA     | 0    | NA                | 0          | 0       | 0  |
|                   | 0                | 0                | 0      | 0    | 0                 | 0          | NA      | NA |
|                   | NA               | NA               | NA     | NA   | NA                | NA         | NA      | NA |
|                   | NA               | NA               | NA     | NA   | NA                | NA         | NA      | NA |
|                   | NA               | NA               | NA     | NA   | NA                | NA         | NA      | NA |
|                   | NA               | NA               | NA     | NA   | NA                | NA         | 0       | NA |
|                   | NA               | NA               | NA     | NA   | NA                | 0          | 0       | NA |
|                   | NA               | NA               | NA     | NA   | NA                | NA         | NA      | NA |
|                   | NA               | NA               | NA     | NA   | NA                | NA         | NA      | NA |
|                   | NA               | NA               | NA     | NA   | NA                | NA         | NA      | NA |
|                   | NA               | NA               | NA     | NA   | NA                | NA         | NA      | NA |
|                   | NA               | NA               | NA     | NA   | NA                | NA         | 0       |    |
| RHD               | NA               | Moffitt          | hs37d5 | 1    | 25611102          | 25611102 + |         |    |
| Missense_Mutation |                  |                  | SNP    | G    | G                 | A          | novel   |    |
| none              | MOF-MA1          | NA               | 0      | 0    | 0                 | 0          | 0       | 0  |
|                   | Unknown          | Untested Somatic | NA     | NA   | WXS               | none       | 0       | 0  |
|                   | Illumina_NextSeq | NA               | NA     | NA   | c.G187A           | NA         | p.G63S  |    |
| NM_016124         | exon2            | 0                | 0      | 0    | 0                 | 0          | 0       | 0  |
|                   | NA               | NA               | NA     | NA   | NA                | NA         | NA      | NA |
|                   | NA               | NA               | NA     | NA   | NA                | NA         | NA      | NA |
|                   | NA               | NA               | NA     | NA   | NA                | NA         | NA      | NA |
|                   | NA               | NA               | NA     | NA   | probably_damaging |            |         | NA |
|                   | NA               | NA               | 0      | NA   | NA                | NA         | NA      | NA |
|                   | NA               | 0                | 0      | NA   | NA                | NA         | NA      | NA |
|                   | NA               | NA               | NA     | NA   | NA                | NA         | NA      | NA |
|                   | NA               | NA               | NA     | NA   | NA                | NA         | NA      | NA |
|                   | NA               | NA               | NA     | NA   | NA                | NA         | NA      | NA |
|                   | NA               | NA               | NA     | NA   | NA                | NA         | NA      | NA |
|                   | NA               | NA               | 0      |      |                   |            |         |    |
| Unknown           | NA               | Moffitt          | hs37d5 | 1    | 26232822          | 26232822 + |         | 0  |
|                   | SNP              | A                | A      | C    | novel             | none       | MOF-MA1 | NA |
|                   | 0                | 0                | 0      | 0    | 0                 | 0          | Unknown |    |
| Untested Somatic  | NA               | NA               | WXS    | none | 0                 | 0          |         |    |
| Illumina_NextSeq  | NA               | NA               | NA     | 0    | NA                | 0          | 0       | 0  |
|                   | 0                | 0                | 0      | 0    | 0                 | 0          | NA      | NA |
|                   | NA               | NA               | NA     | NA   | NA                | NA         | NA      | NA |
|                   | NA               | NA               | NA     | NA   | NA                | NA         | NA      | NA |
|                   | NA               | NA               | NA     | NA   | NA                | NA         | NA      | NA |
|                   | NA               | NA               | NA     | NA   | NA                | NA         | 0       | NA |
|                   | NA               | NA               | NA     | NA   | NA                | 0          | 0       | NA |
|                   | NA               | NA               | NA     | NA   | NA                | NA         | NA      | NA |
|                   | NA               | NA               | NA     | NA   | NA                | NA         | NA      | NA |
|                   | NA               | NA               | NA     | NA   | NA                | NA         | NA      | NA |
|                   | NA               | NA               | NA     | NA   | NA                | NA         | 0       |    |
| Unknown           | NA               | Moffitt          | hs37d5 | 1    | 26646638          | 26646638 + |         | 0  |
|                   | SNP              | C                | C      | G    | novel             | none       | MOF-MA1 | NA |
|                   | 0                | 0                | 0      | 0    | 0                 | 0          | Unknown |    |





|                   |                  |          |         |    |                   |          |         |    |
|-------------------|------------------|----------|---------|----|-------------------|----------|---------|----|
|                   | NA               | NA       | NA      | NA | NA                | NA       | NA      | NA |
|                   | NA               | NA       | NA      | NA | NA                | NA       | NA      | 0  |
| HECTD3            | NA               | Moffitt  | hs37d5  | 1  | 45476845          | 45476845 | +       |    |
| Missense_Mutation |                  |          | SNP     | T  | T                 | G        | novel   |    |
| none              | MOF-MA1          | NA       | 0       | 0  | 0                 | 0        | 0       | 0  |
|                   | Unknown          | Untested | Somatic | NA | WXS               | none     | 0       | 0  |
|                   | Illumina_NextSeq | NA       | NA      | NA | c.A85C            | NA       | p.S29R  |    |
| NM_024602         | exon1            | 0        | 0       | 0  | 0                 | 0        | 0       | 0  |
|                   | NA               | NA       | NA      | NA | NA                | NA       | NA      | NA |
|                   | NA               | NA       | NA      | NA | NA                | NA       | NA      | NA |
|                   | NA               | NA       | NA      | NA | NA                | NA       | NA      | NA |
|                   | NA               | NA       | NA      | NA | benign            | NA       | NA      | NA |
|                   | 0                | NA       | NA      | NA | NA                | NA       | NA      | 0  |
|                   | 0                | NA       | NA      | NA | NA                | NA       | NA      | NA |
|                   | NA               | NA       | NA      | NA | NA                | NA       | NA      | NA |
|                   | NA               | NA       | NA      | NA | NA                | NA       | NA      | NA |
|                   | NA               | NA       | NA      | NA | NA                | NA       | NA      | NA |
|                   | 0                |          |         |    |                   |          |         |    |
| Unknown           | NA               | Moffitt  | hs37d5  | 1  | 51768885          | 51768885 | +       | 0  |
|                   | INS              | G        | G       | GC | novel             | none     | MOF-MA1 | NA |
|                   | 0                | 0        | 0       | 0  | 0                 | 0        | Unknown |    |
| Untested Somatic  | NA               | WXS      | none    | 0  | 0                 | 0        |         |    |
| Illumina_NextSeq  | NA               | NA       | 0       | NA | 0                 | 0        | 0       | 0  |
|                   | 0                | 0        | 0       | 0  | 0                 | 0        | NA      | NA |
|                   | NA               | NA       | NA      | NA | NA                | NA       | NA      | NA |
|                   | NA               | NA       | NA      | NA | NA                | NA       | NA      | NA |
|                   | NA               | NA       | NA      | NA | NA                | NA       | NA      | NA |
|                   | NA               | NA       | NA      | NA | NA                | NA       | 0       | NA |
|                   | NA               | NA       | NA      | NA | NA                | 0        | 0       | NA |
|                   | NA               | NA       | NA      | NA | NA                | NA       | NA      | NA |
|                   | NA               | NA       | NA      | NA | NA                | NA       | NA      | NA |
|                   | NA               | NA       | NA      | NA | NA                | NA       | NA      | NA |
|                   | NA               | NA       | NA      | NA | NA                | NA       | 0       |    |
| LRP8              | NA               | Moffitt  | hs37d5  | 1  | 53742434          | 53742434 | +       |    |
| Missense_Mutation |                  |          | SNP     | C  | C                 | G        | novel   |    |
| none              | MOF-AM2          | NA       | 0       | 0  | 0                 | 0        | 0       | 0  |
|                   | Unknown          | Untested | Somatic | NA | WXS               | none     | 0       | 0  |
|                   | Illumina_NextSeq | NA       | NA      | NA | c.G813C           | NA       | p.E271D |    |
| NM_004631         | exon5            | 0        | 0       | 0  | 0                 | 0        | 0       | 0  |
|                   | NA               | NA       | NA      | NA | NA                | NA       | NA      | NA |
|                   | NA               | NA       | NA      | NA | NA                | NA       | NA      | NA |
|                   | NA               | NA       | NA      | NA | NA                | NA       | NA      | NA |
|                   | NA               | NA       | NA      | NA | probably_damaging |          |         | NA |
|                   | NA               | NA       | 0       | NA | NA                | NA       | NA      | NA |
|                   | NA               | 0        | 0       | NA | NA                | NA       | NA      | NA |
|                   | NA               | NA       | NA      | NA | NA                | NA       | NA      | NA |
|                   | NA               | NA       | NA      | NA | NA                | NA       | NA      | NA |
|                   | NA               | NA       | NA      | NA | NA                | NA       | NA      | NA |
|                   | NA               | NA       | 0       |    |                   |          |         |    |
| Unknown           | NA               | Moffitt  | hs37d5  | 1  | 55058319          | 55058319 | +       | 0  |

|                   |                  |                  |        |      |                   |            |         |    |
|-------------------|------------------|------------------|--------|------|-------------------|------------|---------|----|
|                   | SNP              | T                | T      | G    | novel             | none       | MOF-AM6 | NA |
|                   | 0                | 0                | 0      | 0    | 0                 | 0          | Unknown |    |
| Untested Somatic  | NA               | NA               | WXS    | none | 0                 | 0          |         |    |
| Illumina_NextSeq  | NA               | NA               | NA     | 0    | NA                | 0          | 0       | 0  |
|                   | 0                | 0                | 0      | 0    | 0                 | 0          | NA      | NA |
|                   | NA               | NA               | NA     | NA   | NA                | NA         | NA      | NA |
|                   | NA               | NA               | NA     | NA   | NA                | NA         | NA      | NA |
|                   | NA               | NA               | NA     | NA   | NA                | NA         | NA      | NA |
|                   | NA               | NA               | NA     | NA   | NA                | NA         | 0       | NA |
|                   | NA               | NA               | NA     | NA   | NA                | 0          | 0       | NA |
|                   | NA               | NA               | NA     | NA   | NA                | NA         | NA      | NA |
|                   | NA               | NA               | NA     | NA   | NA                | NA         | NA      | NA |
|                   | NA               | NA               | NA     | NA   | NA                | NA         | NA      | NA |
|                   | NA               | NA               | NA     | NA   | NA                | NA         | NA      | NA |
|                   | NA               | NA               | NA     | NA   | NA                | NA         | NA      | NA |
| HEATR8            | NA               | Moffitt          | hs37d5 | 1    | 55145570          | 55145570 + |         |    |
| Nonsense_Mutation |                  |                  | SNP    | G    | G                 | T          | novel   |    |
| none              | MOF-MA1          | NA               | 0      | 0    | 0                 | 0          | 0       | 0  |
|                   | Unknown          | Untested Somatic | NA     | NA   | WXS               | none       | 0       | 0  |
|                   | Illumina_NextSeq | NA               | NA     | NA   | c.G2233T          | NA         | p.E745X |    |
| NM_001039464      | exon13           | 0                | 0      | 0    | 0                 | 0          | 0       | 0  |
|                   | NA               | NA               | NA     | NA   | NA                | NA         | NA      | NA |
|                   | NA               | NA               | NA     | NA   | NA                | NA         | NA      | NA |
|                   | NA               | NA               | NA     | NA   | NA                | NA         | NA      | NA |
|                   | NA               | NA               | NA     | NA   | possibly_damaging |            |         | NA |
|                   | NA               | 0                | 0      | NA   | NA                | NA         | NA      | NA |
|                   | NA               | 0                | 0      | NA   | NA                | NA         | NA      | NA |
|                   | NA               | NA               | NA     | NA   | NA                | NA         | NA      | NA |
|                   | NA               | NA               | NA     | NA   | NA                | NA         | NA      | NA |
|                   | NA               | NA               | NA     | NA   | NA                | NA         | NA      | NA |
|                   | NA               | NA               | NA     | NA   | NA                | NA         | NA      | NA |
|                   | NA               | NA               | 0      | NA   | NA                | NA         | NA      | NA |
| Unknown           | NA               | Moffitt          | hs37d5 | 1    | 55611642          | 55611642 + |         | 0  |
|                   | INS              | G                | G      | GA   | novel             | none       | MOF-AM5 | NA |
|                   | 0                | 0                | 0      | 0    | 0                 | 0          | Unknown |    |
| Untested Somatic  | NA               | NA               | WXS    | none | 0                 | 0          |         |    |
| Illumina_NextSeq  | NA               | NA               | NA     | 0    | NA                | 0          | 0       | 0  |
|                   | 0                | 0                | 0      | 0    | 0                 | 0          | NA      | NA |
|                   | NA               | NA               | NA     | NA   | NA                | NA         | NA      | NA |
|                   | NA               | NA               | NA     | NA   | NA                | NA         | NA      | NA |
|                   | NA               | NA               | NA     | NA   | NA                | NA         | NA      | NA |
|                   | NA               | NA               | NA     | NA   | NA                | NA         | 0       | NA |
|                   | NA               | NA               | NA     | NA   | NA                | 0          | 0       | NA |
|                   | NA               | NA               | NA     | NA   | NA                | NA         | NA      | NA |
|                   | NA               | NA               | NA     | NA   | NA                | NA         | NA      | NA |
|                   | NA               | NA               | NA     | NA   | NA                | NA         | NA      | NA |
|                   | NA               | NA               | NA     | NA   | NA                | NA         | NA      | NA |
|                   | NA               | NA               | NA     | NA   | NA                | NA         | 0       |    |
| OMA1              | NA               | Moffitt          | hs37d5 | 1    | 59004663          | 59004663 + |         |    |
| Missense_Mutation |                  |                  | SNP    | C    | C                 | T          | novel   |    |
| none              | MOF-MA1          | NA               | 0      | 0    | 0                 | 0          | 0       | 0  |
|                   | Unknown          | Untested Somatic | NA     | NA   | WXS               | none       | 0       | 0  |
|                   | Illumina_NextSeq | NA               | NA     | NA   | c.G304A           | NA         | p.D102N |    |





|                   |         |                  |         |     |                   |            |         |    |
|-------------------|---------|------------------|---------|-----|-------------------|------------|---------|----|
|                   | NA      | NA               | NA      | NA  | NA                | NA         | NA      | NA |
|                   | NA      | NA               | NA      | NA  | benign            | NA         | NA      | NA |
|                   | 0       | NA               | NA      | NA  | NA                | NA         | NA      | 0  |
|                   | 0       | NA               | NA      | NA  | NA                | NA         | NA      | NA |
|                   | NA      | NA               | NA      | NA  | NA                | NA         | NA      | NA |
|                   | NA      | NA               | NA      | NA  | NA                | NA         | NA      | NA |
|                   | NA      | NA               | NA      | NA  | NA                | NA         | NA      | NA |
|                   | 0       |                  |         |     |                   |            |         |    |
| FAM69A            | NA      | Moffitt          | hs37d5  | 1   | 93309708          | 93309708 + |         |    |
| Silent            | SNP     | G                | G       | A   | novel             | none       | MOF-MA1 | NA |
|                   | 0       | 0                | 0       | 0   | 0                 | 0          | Unknown |    |
| Untested Somatic  | NA      | WXS              | none    | 0   | 0                 |            |         |    |
| Illumina_NextSeq  | NA      | NA               | c.C519T | NA  | NA                | p.L173L    |         |    |
| NM_001006605      | exon5   | 0                | 0       | 0   | 0                 | 0          | 0       | 0  |
|                   | NA      | NA               | NA      | NA  | NA                | NA         | NA      | NA |
|                   | NA      | NA               | NA      | NA  | NA                | NA         | NA      | NA |
|                   | NA      | NA               | NA      | NA  | NA                | NA         | NA      | NA |
|                   | NA      | NA               | NA      | NA  | NA                | NA         | NA      | NA |
|                   | 0       | NA               | NA      | NA  | NA                | NA         | NA      | 0  |
|                   | 0       | NA               | NA      | NA  | NA                | NA         | NA      | NA |
|                   | NA      | NA               | NA      | NA  | NA                | NA         | NA      | NA |
|                   | NA      | NA               | NA      | NA  | NA                | NA         | NA      | NA |
|                   | NA      | NA               | NA      | NA  | NA                | NA         | NA      | NA |
|                   | 0       |                  |         |     |                   |            |         |    |
| Unknown           | NA      | Moffitt          | hs37d5  | 1   | 94484145          | 94484145 + |         | 0  |
|                   | SNP     | C                | C       | T   | novel             | none       | MOF-MA1 | NA |
|                   | 0       | 0                | 0       | 0   | 0                 | 0          | Unknown |    |
| Untested Somatic  | NA      | WXS              | none    | 0   | 0                 |            |         |    |
| Illumina_NextSeq  | NA      | NA               | 0       | NA  | 0                 | 0          | 0       | 0  |
|                   | 0       | 0                | 0       | 0   | 0                 | 0          | NA      | NA |
|                   | NA      | NA               | NA      | NA  | NA                | NA         | NA      | NA |
|                   | NA      | NA               | NA      | NA  | NA                | NA         | NA      | NA |
|                   | NA      | NA               | NA      | NA  | NA                | NA         | NA      | NA |
|                   | NA      | NA               | NA      | NA  | NA                | NA         | 0       | NA |
|                   | NA      | NA               | NA      | NA  | NA                | 0          | 0       | NA |
|                   | NA      | NA               | NA      | NA  | NA                | NA         | NA      | NA |
|                   | NA      | NA               | NA      | NA  | NA                | NA         | NA      | NA |
|                   | NA      | NA               | NA      | NA  | NA                | NA         | NA      | NA |
|                   | NA      | NA               | NA      | NA  | NA                | NA         | 0       |    |
| ARHGAP29          | NA      | Moffitt          | hs37d5  | 1   | 94670745          | 94670745 + |         |    |
| Missense_Mutation |         | SNP              | G       | G   | A                 | novel      |         |    |
| none              | MOF-MA1 | NA               | 0       | 0   | 0                 | 0          | 0       | 0  |
|                   | Unknown | Untested Somatic | NA      | WXS | none              | 0          | 0       | 0  |
| Illumina_NextSeq  | NA      | NA               | c.C569T | NA  | NA                | p.S190F    |         |    |
| NM_004815         | exon7   | 0                | 0       | 0   | 0                 | 0          | 0       | 0  |
|                   | NA      | NA               | NA      | NA  | NA                | NA         | NA      | NA |
|                   | NA      | NA               | NA      | NA  | NA                | NA         | NA      | NA |
|                   | NA      | NA               | NA      | NA  | NA                | NA         | NA      | NA |
|                   | NA      | NA               | NA      | NA  | possibly_damaging |            |         | NA |
|                   | NA      | NA               | 0       | NA  | NA                | NA         | NA      | NA |



|           |                   |                   |                  |          |           |      |           |    |
|-----------|-------------------|-------------------|------------------|----------|-----------|------|-----------|----|
| AKNAD1    | NA                | Moffitt           | hs37d5           | 1        | 109373254 |      | 109373254 |    |
|           | +                 | Missense_Mutation |                  |          | SNP       | G    | G         | C  |
|           | novel             | none              | MOF-AM2          | NA       | 0         | 0    | 0         | 0  |
|           | 0                 | 0                 | Unknown          | Untested | Somatic   | NA   | WXS       |    |
| none      | 0                 | 0                 | Illumina_NextSeq | NA       | NA        | NA   | c.C1765G  | NA |
|           | p.P589A           | NM_152763         | exon10           |          | 0         | 0    | 0         | 0  |
|           | 0                 | 0                 | NA               | NA       | NA        | NA   | NA        | NA |
|           | NA                | NA                | NA               | NA       | NA        | NA   | NA        | NA |
|           | NA                | NA                | NA               | NA       | NA        | NA   | NA        | NA |
|           | NA                | NA                | NA               | NA       | NA        | NA   | benign    | NA |
|           | NA                | NA                | 0                | NA       | NA        | NA   | NA        | NA |
|           | NA                | 0                 | 0                | NA       | NA        | NA   | NA        | NA |
|           | NA                | NA                | NA               | NA       | NA        | NA   | NA        | NA |
|           | NA                | NA                | NA               | NA       | NA        | NA   | NA        | NA |
|           | NA                | NA                | NA               | NA       | NA        | NA   | NA        | NA |
|           | NA                | NA                | 0                | NA       | NA        | NA   | NA        | NA |
|           | NA                | NA                | 0                | NA       | NA        | NA   | NA        | NA |
|           | NA                | NA                | NA               | NA       | NA        | NA   | NA        | NA |
|           | NA                | NA                | NA               | NA       | NA        | NA   | NA        | NA |
|           | NA                | NA                | 0                | NA       | NA        | NA   | NA        | NA |
| GNAI3     | NA                | Moffitt           | hs37d5           | 1        | 110091348 |      | 110091348 |    |
|           | +                 | Silent            | SNP              | C        | C         | A    | novel     |    |
| none      | MOF-AM5           | NA                | 0                | 0        | 0         | 0    | 0         | 0  |
|           | Unknown           | Untested          | Somatic          | NA       | WXS       | none | 0         | 0  |
|           | Illumina_NextSeq  | NA                | NA               | NA       | c.C6A     | NA   | p.G2G     |    |
| NM_006496 |                   | exon1             | 0                | 0        | 0         | 0    | 0         | 0  |
|           | NA                | NA                | NA               | NA       | NA        | NA   | NA        | NA |
|           | NA                | NA                | NA               | NA       | NA        | NA   | NA        | NA |
|           | NA                | NA                | NA               | NA       | NA        | NA   | NA        | NA |
|           | NA                | NA                | NA               | NA       | NA        | NA   | NA        | NA |
|           | 0                 | NA                | NA               | NA       | NA        | NA   | NA        | 0  |
|           | 0                 | NA                | NA               | NA       | NA        | NA   | NA        | NA |
|           | NA                | NA                | NA               | NA       | NA        | NA   | NA        | NA |
|           | NA                | NA                | NA               | NA       | NA        | NA   | NA        | NA |
|           | NA                | NA                | NA               | NA       | NA        | NA   | NA        | NA |
|           | 0                 | NA                | NA               | NA       | NA        | NA   | NA        | NA |
| NRAS      | NA                | Moffitt           | hs37d5           | 1        | 115252296 |      | 115252296 |    |
|           | +                 | Missense_Mutation |                  |          | SNP       | C    | C         | G  |
|           | novel             | none              | MOF-MA1          | NA       | 0         | 0    | 0         | 0  |
|           | 0                 | 0                 | Unknown          | Untested | Somatic   | NA   | WXS       |    |
| none      | 0                 | 0                 | Illumina_NextSeq | NA       | NA        | NA   | c.G344C   | NA |
|           | p.G115A           | NM_002524         | exon4            |          | 0         | 0    | 0         | 0  |
|           | 0                 | 0                 | NA               | NA       | NA        | NA   | NA        | NA |
|           | NA                | NA                | NA               | NA       | NA        | NA   | NA        | NA |
|           | NA                | NA                | NA               | NA       | NA        | NA   | NA        | NA |
|           | NA                | NA                | NA               | NA       | NA        | NA   | NA        | NA |
|           | possibly_damaging |                   | NA               | NA       | NA        | 0    | NA        | NA |
|           | NA                | NA                | NA               | NA       | 0         | 0    | NA        | NA |
|           | NA                | NA                | NA               | NA       | NA        | NA   | NA        | NA |
|           | NA                | NA                | NA               | NA       | NA        | NA   | NA        | NA |
|           | NA                | NA                | NA               | NA       | NA        | NA   | NA        | NA |
|           | NA                | NA                | NA               | NA       | NA        | 0    | NA        | NA |
| Unknown   | NA                | Moffitt           | hs37d5           | 1        | 115256636 |      | 115256636 |    |
|           | +                 | 0                 | SNP              | G        | G         | C    | novel     |    |







|           |                  |          |         |    |           |           |         |    |
|-----------|------------------|----------|---------|----|-----------|-----------|---------|----|
| Unknown   | NA               | Moffitt  | hs37d5  | 1  | 156146114 | 156146114 |         |    |
|           | +                | 0        | SNP     | T  | T         | G         | novel   |    |
| none      | MOF-MA1          | NA       | 0       | 0  | 0         | 0         | 0       | 0  |
|           | Unknown          | Untested | Somatic | NA | WXS       | none      | 0       | 0  |
|           | Illumina_NextSeq | NA       | NA      | NA | 0         | NA        | 0       | 0  |
|           | 0                | 0        | 0       | 0  | 0         | 0         | 0       | NA |
|           | NA               | NA       | NA      | NA | NA        | NA        | NA      | NA |
|           | NA               | NA       | NA      | NA | NA        | NA        | NA      | NA |
|           | NA               | NA       | NA      | NA | NA        | NA        | NA      | NA |
|           | NA               | NA       | NA      | NA | NA        | NA        | NA      | 0  |
|           | NA               | NA       | NA      | NA | NA        | NA        | 0       | 0  |
|           | NA               | NA       | NA      | NA | NA        | NA        | NA      | NA |
|           | NA               | NA       | NA      | NA | NA        | NA        | NA      | NA |
|           | NA               | NA       | NA      | NA | NA        | NA        | NA      | NA |
|           | NA               | NA       | NA      | NA | NA        | NA        | NA      | 0  |
| IQGAP3    | NA               | Moffitt  | hs37d5  | 1  | 156521806 | 156521806 |         |    |
|           | +                | Silent   | SNP     | G  | G         | A         | novel   |    |
| none      | MOF-AM2          | NA       | 0       | 0  | 0         | 0         | 0       | 0  |
|           | Unknown          | Untested | Somatic | NA | WXS       | none      | 0       | 0  |
|           | Illumina_NextSeq | NA       | NA      | NA | c.C1530T  | NA        | p.T510T |    |
| NM_178229 |                  | exon14   | 0       | 0  | 0         | 0         | 0       | 0  |
|           | NA               | NA       | NA      | NA | NA        | NA        | NA      | NA |
|           | NA               | NA       | NA      | NA | NA        | NA        | NA      | NA |
|           | NA               | NA       | NA      | NA | NA        | NA        | NA      | NA |
|           | 0                | NA       | NA      | NA | NA        | NA        | NA      | 0  |
|           | 0                | NA       | NA      | NA | NA        | NA        | NA      | NA |
|           | NA               | NA       | NA      | NA | NA        | NA        | NA      | NA |
|           | NA               | NA       | NA      | NA | NA        | NA        | NA      | NA |
|           | NA               | NA       | NA      | NA | NA        | NA        | NA      | NA |
|           | 0                |          |         |    |           |           |         |    |
| SLAMF1    | NA               | Moffitt  | hs37d5  | 1  | 160604683 | 160604683 |         |    |
|           | +                | Silent   | SNP     | C  | C         | T         | novel   |    |
| none      | MOF-AM2          | NA       | 0       | 0  | 0         | 0         | 0       | 0  |
|           | Unknown          | Untested | Somatic | NA | WXS       | none      | 0       | 0  |
|           | Illumina_NextSeq | NA       | NA      | NA | c.G420A   | NA        | p.Q140Q |    |
| NM_003037 |                  | exon3    | 0       | 0  | 0         | 0         | 0       | 0  |
|           | NA               | NA       | NA      | NA | NA        | NA        | NA      | NA |
|           | NA               | NA       | NA      | NA | NA        | NA        | NA      | NA |
|           | NA               | NA       | NA      | NA | NA        | NA        | NA      | NA |
|           | 0                | NA       | NA      | NA | NA        | NA        | NA      | 0  |
|           | 0                | NA       | NA      | NA | NA        | NA        | NA      | NA |
|           | NA               | NA       | NA      | NA | NA        | NA        | NA      | NA |
|           | NA               | NA       | NA      | NA | NA        | NA        | NA      | NA |
|           | NA               | NA       | NA      | NA | NA        | NA        | NA      | NA |
|           | 0                |          |         |    |           |           |         |    |
| Unknown   | NA               | Moffitt  | hs37d5  | 1  | 161643067 | 161643067 |         |    |
|           | +                | 0        | SNP     | C  | C         | T         | novel   |    |
| none      | MOF-AM6          | NA       | 0       | 0  | 0         | 0         | 0       | 0  |









|                   |                  |                   |                  |          |           |      |           |    |
|-------------------|------------------|-------------------|------------------|----------|-----------|------|-----------|----|
|                   | 0                |                   |                  |          |           |      |           |    |
| OBSCN             | NA               | Moffitt           | hs37d5           | 1        | 228557666 |      | 228557666 |    |
|                   | +                | Missense_Mutation |                  |          | SNP       | C    | C         | T  |
|                   | novel            | none              | MOF-AM2          | NA       | 0         | 0    | 0         | 0  |
|                   | 0                | 0                 | Unknown          | Untested | Somatic   | NA   | WXS       |    |
| none              | 0                | 0                 | Illumina_NextSeq | NA       | NA        | NA   | c.C19991T |    |
|                   | NA               | p.A6664V          | NM_001098623     | exon91   | 0         | 0    | 0         | 0  |
|                   | 0                | 0                 | 0                | NA       | NA        | NA   | NA        | NA |
|                   | NA               | NA                | NA               | NA       | NA        | NA   | NA        | NA |
|                   | NA               | NA                | NA               | NA       | NA        | NA   | NA        | NA |
|                   | NA               | NA                | NA               | NA       | NA        | NA   | NA        | NA |
|                   | NA               | NA                | NA               | 0        | NA        | NA   | NA        | NA |
|                   | NA               | NA                | 0                | 0        | NA        | NA   | NA        | NA |
|                   | NA               | NA                | NA               | NA       | NA        | NA   | NA        | NA |
|                   | NA               | NA                | NA               | NA       | NA        | NA   | NA        | NA |
|                   | NA               | NA                | NA               | NA       | NA        | NA   | NA        | NA |
|                   | NA               | NA                | NA               | NA       | NA        | NA   | NA        | NA |
|                   | NA               | NA                | NA               | 0        | NA        | NA   | NA        | NA |
|                   | NA               | NA                | NA               | NA       | NA        | NA   | NA        | NA |
|                   | NA               | NA                | NA               | NA       | NA        | NA   | NA        | NA |
| Unknown           | NA               | Moffitt           | hs37d5           | 1        | 231376705 |      | 231376705 |    |
|                   | +                | 0                 | SNP              | C        | C         | A    | novel     |    |
| none              | MOF-MA1          | NA                | 0                | 0        | 0         | 0    | 0         | 0  |
|                   | Unknown          | Untested          | Somatic          | NA       | WXS       | none | 0         | 0  |
|                   | Illumina_NextSeq | NA                | NA               | NA       | 0         | NA   | 0         | 0  |
|                   | 0                | 0                 | 0                | 0        | 0         | 0    | 0         | NA |
|                   | NA               | NA                | NA               | NA       | NA        | NA   | NA        | NA |
|                   | NA               | NA                | NA               | NA       | NA        | NA   | NA        | NA |
|                   | NA               | NA                | NA               | NA       | NA        | NA   | NA        | NA |
|                   | NA               | NA                | NA               | NA       | NA        | NA   | NA        | 0  |
|                   | NA               | NA                | NA               | NA       | NA        | NA   | 0         | 0  |
|                   | NA               | NA                | NA               | NA       | NA        | NA   | NA        | NA |
|                   | NA               | NA                | NA               | NA       | NA        | NA   | NA        | NA |
|                   | NA               | NA                | NA               | NA       | NA        | NA   | NA        | NA |
|                   | NA               | NA                | NA               | NA       | NA        | NA   | NA        | NA |
|                   | NA               | NA                | NA               | NA       | NA        | NA   | NA        | 0  |
| ARID4B            | NA               | Moffitt           | hs37d5           | 1        | 235420530 |      | 235420530 |    |
|                   | +                | Missense_Mutation |                  |          | SNP       | C    | C         | G  |
|                   | novel            | none              | MOF-MA1          | NA       | 0         | 0    | 0         | 0  |
|                   | 0                | 0                 | Unknown          | Untested | Somatic   | NA   | WXS       |    |
| none              | 0                | 0                 | Illumina_NextSeq | NA       | NA        | NA   | c.G128C   | NA |
|                   | p.R43T           | NM_016374         | exon4            | 0        | 0         | 0    | 0         | 0  |
|                   | 0                | 0                 | NA               | NA       | NA        | NA   | NA        | NA |
|                   | NA               | NA                | NA               | NA       | NA        | NA   | NA        | NA |
|                   | NA               | NA                | NA               | NA       | NA        | NA   | NA        | NA |
|                   | NA               | NA                | NA               | NA       | NA        | NA   | NA        | NA |
|                   | NA               | NA                | NA               | NA       | NA        | NA   | NA        | NA |
|                   | NA               | NA                | NA               | NA       | NA        | 0    | NA        | NA |
| probably_damaging | NA               | NA                | NA               | NA       | 0         | 0    | NA        | NA |
|                   | NA               | NA                | NA               | NA       | NA        | NA   | NA        | NA |
|                   | NA               | NA                | NA               | NA       | NA        | NA   | NA        | NA |
|                   | NA               | NA                | NA               | NA       | NA        | NA   | NA        | NA |
|                   | NA               | NA                | NA               | NA       | NA        | NA   | NA        | NA |
|                   | NA               | NA                | NA               | NA       | NA        | 0    | NA        | NA |
| Unknown           | NA               | Moffitt           | hs37d5           | 1        | 235910558 |      | 235910558 |    |
|                   | +                | 0                 | SNP              | C        | C         | T    | novel     |    |







|                   |                   |                   |                  |          |           |         |           |    |  |
|-------------------|-------------------|-------------------|------------------|----------|-----------|---------|-----------|----|--|
| OR14A16           | NA                | NA                | 0                |          |           |         |           |    |  |
|                   | NA                | Moffitt           | hs37d5           | 1        | 247978740 |         | 247978740 |    |  |
|                   | +                 | Nonsense_Mutation |                  |          | SNP       | G       | G         | A  |  |
|                   | novel             | none              | MOF-MA1          | NA       | 0         | 0       | 0         | 0  |  |
|                   | 0                 | 0                 | Unknown          | Untested | Somatic   | NA      | WXS       |    |  |
| none              | 0                 | 0                 | Illumina_NextSeq | NA       | NA        | NA      | c.C292T   | NA |  |
|                   | p.Q98X            | NM_001001966      | exon1            | 0        | 0         | 0       | 0         | 0  |  |
|                   | 0                 | 0                 | NA               | NA       | NA        | NA      | NA        | NA |  |
|                   | NA                | NA                | NA               | NA       | NA        | NA      | NA        | NA |  |
|                   | NA                | NA                | NA               | NA       | NA        | NA      | NA        | NA |  |
|                   | NA                | NA                | NA               | NA       | NA        | NA      | NA        | NA |  |
|                   | possibly_damaging |                   | NA               | NA       | NA        | 0       | NA        | NA |  |
|                   | NA                | NA                | NA               | NA       | 0         | 0       | NA        | NA |  |
|                   | NA                | NA                | NA               | NA       | NA        | NA      | NA        | NA |  |
|                   | NA                | NA                | NA               | NA       | NA        | NA      | NA        | NA |  |
|                   | NA                | NA                | NA               | NA       | NA        | NA      | NA        | NA |  |
|                   | NA                | NA                | NA               | NA       | NA        | 0       | NA        | NA |  |
| Unknown           | NA                | Moffitt           | hs37d5           | 10       | 3209247   | 3209247 | +         | 0  |  |
|                   | SNP               | G                 | G                | C        | novel     | none    | MOF-MA1   | NA |  |
|                   | 0                 | 0                 | 0                | 0        | 0         | 0       | Unknown   |    |  |
| Untested Somatic  | NA                | WXS               | none             |          | 0         | 0       |           |    |  |
| Illumina_NextSeq  | NA                | NA                | 0                | NA       | 0         | 0       | 0         | 0  |  |
|                   | 0                 | 0                 | 0                | 0        | 0         | 0       | NA        | NA |  |
|                   | NA                | NA                | NA               | NA       | NA        | NA      | NA        | NA |  |
|                   | NA                | NA                | NA               | NA       | NA        | NA      | NA        | NA |  |
|                   | NA                | NA                | NA               | NA       | NA        | NA      | NA        | NA |  |
|                   | NA                | NA                | NA               | NA       | NA        | NA      | 0         | NA |  |
|                   | NA                | NA                | NA               | NA       | NA        | 0       | 0         | NA |  |
|                   | NA                | NA                | NA               | NA       | NA        | NA      | NA        | NA |  |
|                   | NA                | NA                | NA               | NA       | NA        | NA      | NA        | NA |  |
|                   | NA                | NA                | NA               | NA       | NA        | NA      | NA        | NA |  |
|                   | NA                | NA                | NA               | NA       | NA        | NA      | NA        | NA |  |
|                   | NA                | NA                | NA               | NA       | NA        | NA      | NA        | NA |  |
|                   | NA                | NA                | NA               | NA       | NA        | NA      | 0         | NA |  |
| Unknown           | NA                | Moffitt           | hs37d5           | 10       | 3209252   | 3209252 | +         | 0  |  |
|                   | SNP               | A                 | A                | C        | novel     | none    | MOF-MA1   | NA |  |
|                   | 0                 | 0                 | 0                | 0        | 0         | 0       | Unknown   |    |  |
| Untested Somatic  | NA                | WXS               | none             |          | 0         | 0       |           |    |  |
| Illumina_NextSeq  | NA                | NA                | 0                | NA       | 0         | 0       | 0         | 0  |  |
|                   | 0                 | 0                 | 0                | 0        | 0         | 0       | NA        | NA |  |
|                   | NA                | NA                | NA               | NA       | NA        | NA      | NA        | NA |  |
|                   | NA                | NA                | NA               | NA       | NA        | NA      | NA        | NA |  |
|                   | NA                | NA                | NA               | NA       | NA        | NA      | NA        | NA |  |
|                   | NA                | NA                | NA               | NA       | NA        | NA      | 0         | NA |  |
|                   | NA                | NA                | NA               | NA       | NA        | 0       | 0         | NA |  |
|                   | NA                | NA                | NA               | NA       | NA        | NA      | NA        | NA |  |
|                   | NA                | NA                | NA               | NA       | NA        | NA      | NA        | NA |  |
|                   | NA                | NA                | NA               | NA       | NA        | NA      | NA        | NA |  |
|                   | NA                | NA                | NA               | NA       | NA        | NA      | 0         | NA |  |
| KLF6              | NA                | Moffitt           | hs37d5           | 10       | 3824024   | 3824024 | +         |    |  |
| Nonsense_Mutation |                   | SNP               | C                | C        | C         | T       | novel     |    |  |
| none              | MOF-MA1           | NA                | 0                | 0        | 0         | 0       | 0         | 0  |  |







|                   |                  |          |         |    |                   |          |         |    |
|-------------------|------------------|----------|---------|----|-------------------|----------|---------|----|
|                   | NA               | NA       | NA      | NA | NA                | NA       | NA      | NA |
|                   | NA               | NA       | NA      | NA | NA                | NA       | NA      | NA |
|                   | NA               | NA       | NA      | NA | NA                | NA       | 0       |    |
| ERCC6             | NA               | Moffitt  | hs37d5  | 10 | 50681013          | 50681013 | +       |    |
| Missense_Mutation |                  |          | SNP     | G  | G                 | A        | novel   |    |
| none              | MOF-AM2          | NA       | 0       | 0  | 0                 | 0        | 0       | 0  |
|                   | Unknown          | Untested | Somatic | NA | WXS               | none     | 0       | 0  |
|                   | Illumina_NextSeq | NA       | NA      | NA | c.C2771T          | NA       | p.T924M |    |
| NM_000124         | exon15           | 0        | 0       | 0  | 0                 | 0        | 0       | 0  |
|                   | NA               | NA       | NA      | NA | NA                | NA       | NA      | NA |
|                   | NA               | NA       | NA      | NA | NA                | NA       | NA      | NA |
|                   | NA               | NA       | NA      | NA | NA                | NA       | NA      | NA |
|                   | NA               | NA       | NA      | NA | probably_damaging |          |         | NA |
|                   | NA               | NA       | 0       | NA | NA                | NA       | NA      | NA |
|                   | NA               | 0        | 0       | NA | NA                | NA       | NA      | NA |
|                   | NA               | NA       | NA      | NA | NA                | NA       | NA      | NA |
|                   | NA               | NA       | NA      | NA | NA                | NA       | NA      | NA |
|                   | NA               | NA       | NA      | NA | NA                | NA       | NA      | NA |
|                   | NA               | NA       | 0       | NA | NA                | NA       | NA      | NA |
| Unknown           | NA               | Moffitt  | hs37d5  | 10 | 61840397          | 61840397 | +       | 0  |
|                   | SNP              | G        | G       | C  | novel             | none     | MOF-MA1 | NA |
|                   | 0                | 0        | 0       | 0  | 0                 | 0        | Unknown |    |
| Untested Somatic  | NA               | WXS      | none    | 0  | 0                 | 0        |         |    |
| Illumina_NextSeq  | NA               | NA       | 0       | NA | 0                 | 0        | NA      | 0  |
|                   | 0                | 0        | 0       | 0  | 0                 | 0        | NA      | NA |
|                   | NA               | NA       | NA      | NA | NA                | NA       | NA      | NA |
|                   | NA               | NA       | NA      | NA | NA                | NA       | NA      | NA |
|                   | NA               | NA       | NA      | NA | NA                | NA       | NA      | NA |
|                   | NA               | NA       | NA      | NA | NA                | NA       | 0       | NA |
|                   | NA               | NA       | NA      | NA | NA                | 0        | 0       | NA |
|                   | NA               | NA       | NA      | NA | NA                | NA       | NA      | NA |
|                   | NA               | NA       | NA      | NA | NA                | NA       | NA      | NA |
|                   | NA               | NA       | NA      | NA | NA                | NA       | NA      | NA |
|                   | NA               | NA       | NA      | NA | NA                | NA       | 0       |    |
| ANK3              | NA               | Moffitt  | hs37d5  | 10 | 61932881          | 61932881 | +       |    |
| Missense_Mutation |                  |          | SNP     | G  | G                 | C        | novel   |    |
| none              | MOF-AM5          | NA       | 0       | 0  | 0                 | 0        | 0       | 0  |
|                   | Unknown          | Untested | Somatic | NA | WXS               | none     | 0       | 0  |
|                   | Illumina_NextSeq | NA       | NA      | NA | c.C2248G          | NA       | p.L750V |    |
| NM_020987         | exon19           | 0        | 0       | 0  | 0                 | 0        | 0       | 0  |
|                   | NA               | NA       | NA      | NA | NA                | NA       | NA      | NA |
|                   | NA               | NA       | NA      | NA | NA                | NA       | NA      | NA |
|                   | NA               | NA       | NA      | NA | NA                | NA       | NA      | NA |
|                   | NA               | NA       | NA      | NA | possibly_damaging |          |         | NA |
|                   | NA               | NA       | 0       | NA | NA                | NA       | NA      | NA |
|                   | NA               | 0        | 0       | NA | NA                | NA       | NA      | NA |
|                   | NA               | NA       | NA      | NA | NA                | NA       | NA      | NA |
|                   | NA               | NA       | NA      | NA | NA                | NA       | NA      | NA |
|                   | NA               | NA       | NA      | NA | NA                | NA       | NA      | NA |
|                   | NA               | NA       | 0       | NA | NA                | NA       | NA      | NA |

|                   |                  |          |         |     |                   |          |         |    |
|-------------------|------------------|----------|---------|-----|-------------------|----------|---------|----|
| JMJD1C            | NA               | Moffitt  | hs37d5  | 10  | 64968824          | 64968824 | +       |    |
| Missense_Mutation |                  |          | SNP     | C   | C                 | G        | novel   |    |
| none              | MOF-MA1          | NA       | 0       | 0   | 0                 | 0        | 0       | 0  |
|                   | Unknown          | Untested | Somatic | NA  | WXS               | none     | 0       | 0  |
|                   | Illumina_NextSeq | NA       | NA      | NA  | c.G2866C          | NA       | p.E956Q |    |
| NM_032776         | exon9            | 0        | 0       | 0   | 0                 | 0        | 0       | 0  |
|                   | NA               | NA       | NA      | NA  | NA                | NA       | NA      | NA |
|                   | NA               | NA       | NA      | NA  | NA                | NA       | NA      | NA |
|                   | NA               | NA       | NA      | NA  | NA                | NA       | NA      | NA |
|                   | NA               | NA       | NA      | NA  | probably_damaging |          |         | NA |
|                   | NA               | NA       | 0       | NA  | NA                | NA       | NA      | NA |
|                   | NA               | 0        | 0       | NA  | NA                | NA       | NA      | NA |
|                   | NA               | NA       | NA      | NA  | NA                | NA       | NA      | NA |
|                   | NA               | NA       | NA      | NA  | NA                | NA       | NA      | NA |
|                   | NA               | NA       | NA      | NA  | NA                | NA       | NA      | NA |
|                   | NA               | NA       | 0       | NA  | NA                | NA       | NA      | NA |
| DDX50             | NA               | Moffitt  | hs37d5  | 10  | 70673943          | 70673943 | +       |    |
| Missense_Mutation |                  |          | SNP     | G   | G                 | A        | novel   |    |
| none              | MOF-AM5          | NA       | 0       | 0   | 0                 | 0        | 0       | 0  |
|                   | Unknown          | Untested | Somatic | NA  | WXS               | none     | 0       | 0  |
|                   | Illumina_NextSeq | NA       | NA      | NA  | c.G1072A          | NA       | p.A358T |    |
| NM_024045         | exon7            | 0        | 0       | 0   | 0                 | 0        | 0       | 0  |
|                   | NA               | NA       | NA      | NA  | NA                | NA       | NA      | NA |
|                   | NA               | NA       | NA      | NA  | NA                | NA       | NA      | NA |
|                   | NA               | NA       | NA      | NA  | NA                | NA       | NA      | NA |
|                   | NA               | NA       | NA      | NA  | benign            | NA       | NA      | NA |
|                   | 0                | NA       | NA      | NA  | NA                | NA       | NA      | 0  |
|                   | 0                | NA       | NA      | NA  | NA                | NA       | NA      | NA |
|                   | NA               | NA       | NA      | NA  | NA                | NA       | NA      | NA |
|                   | NA               | NA       | NA      | NA  | NA                | NA       | NA      | NA |
|                   | NA               | NA       | NA      | NA  | NA                | NA       | NA      | NA |
|                   | 0                |          |         |     |                   |          |         |    |
| Unknown           | NA               | Moffitt  | hs37d5  | 10  | 73537875          | 73537875 | +       | 0  |
|                   | SNP              | C        | C       | T   | novel             | none     | MOF-MA1 | NA |
|                   | 0                | 0        | 0       | 0   | 0                 | 0        | Unknown |    |
|                   | Untested         | Somatic  | NA      | WXS | none              | 0        |         |    |
|                   | Illumina_NextSeq | NA       | NA      | 0   | NA                | 0        | 0       | 0  |
|                   | 0                | 0        | 0       | 0   | 0                 | 0        | NA      | NA |
|                   | NA               | NA       | NA      | NA  | NA                | NA       | NA      | NA |
|                   | NA               | NA       | NA      | NA  | NA                | NA       | NA      | NA |
|                   | NA               | NA       | NA      | NA  | NA                | NA       | NA      | NA |
|                   | NA               | NA       | NA      | NA  | NA                | NA       | 0       | NA |
|                   | NA               | NA       | NA      | NA  | NA                | 0        | 0       | NA |
|                   | NA               | NA       | NA      | NA  | NA                | NA       | NA      | NA |
|                   | NA               | NA       | NA      | NA  | NA                | NA       | NA      | NA |
|                   | NA               | NA       | NA      | NA  | NA                | NA       | NA      | NA |
|                   | NA               | NA       | NA      | NA  | NA                | NA       | 0       | NA |
|                   | NA               | NA       | NA      | NA  | NA                | NA       | NA      | NA |
|                   | NA               | NA       | NA      | NA  | NA                | NA       | NA      | NA |
|                   | NA               | NA       | NA      | NA  | NA                | NA       | 0       | NA |
| Unknown           | NA               | Moffitt  | hs37d5  | 10  | 81923255          | 81923255 | +       | 0  |
|                   | SNP              | C        | C       | T   | novel             | none     | MOF-AM2 | NA |
|                   | 0                | 0        | 0       | 0   | 0                 | 0        | Unknown |    |







|                   |                  |                   |                  |          |           |           |          |    |
|-------------------|------------------|-------------------|------------------|----------|-----------|-----------|----------|----|
|                   | NA               | NA                | NA               | NA       | NA        | NA        | NA       | NA |
|                   | NA               | NA                | NA               | NA       | NA        | NA        | NA       | 0  |
| Unknown           | NA               | Moffitt           | hs37d5           | 10       | 118030656 | 118030656 | novel    |    |
|                   | +                | 0                 | SNP              | T        | T         | G         |          |    |
| none              | MOF-MA1          | NA                | 0                | 0        | 0         | 0         | 0        | 0  |
|                   | Unknown          | Untested          | Somatic          | NA       | WXS       | none      | 0        | 0  |
|                   | Illumina_NextSeq | NA                | NA               | NA       | 0         | NA        | 0        | 0  |
|                   | 0                | 0                 | 0                | 0        | 0         | 0         | 0        | NA |
|                   | NA               | NA                | NA               | NA       | NA        | NA        | NA       | NA |
|                   | NA               | NA                | NA               | NA       | NA        | NA        | NA       | NA |
|                   | NA               | NA                | NA               | NA       | NA        | NA        | NA       | NA |
|                   | NA               | NA                | NA               | NA       | NA        | NA        | NA       | 0  |
|                   | NA               | NA                | NA               | NA       | NA        | NA        | 0        | 0  |
|                   | NA               | NA                | NA               | NA       | NA        | NA        | NA       | NA |
|                   | NA               | NA                | NA               | NA       | NA        | NA        | NA       | NA |
|                   | NA               | NA                | NA               | NA       | NA        | NA        | NA       | NA |
|                   | NA               | NA                | NA               | NA       | NA        | NA        | NA       | 0  |
| ATE1              | NA               | Moffitt           | hs37d5           | 10       | 123600601 | 123600601 |          |    |
|                   | +                | Missense_Mutation |                  |          | SNP       | G         | G        | C  |
|                   | novel            | none              | MOF-MA1          | NA       | 0         | 0         | 0        | 0  |
|                   | 0                | 0                 | Unknown          | Untested | Somatic   | NA        | WXS      |    |
| none              | 0                | 0                 | Illumina_NextSeq | NA       | NA        | NA        | c.C1153G | NA |
|                   | p.L385V          | NM_007041         | exon9            | 0        | 0         | 0         | 0        | 0  |
|                   | 0                | 0                 | NA               | NA       | NA        | NA        | NA       | NA |
|                   | NA               | NA                | NA               | NA       | NA        | NA        | NA       | NA |
|                   | NA               | NA                | NA               | NA       | NA        | NA        | NA       | NA |
|                   | NA               | NA                | NA               | NA       | NA        | NA        | NA       | NA |
| probably_damaging |                  |                   | NA               | NA       | NA        | 0         | NA       | NA |
|                   | NA               | NA                | NA               | NA       | 0         | 0         | NA       | NA |
|                   | NA               | NA                | NA               | NA       | NA        | NA        | NA       | NA |
|                   | NA               | NA                | NA               | NA       | NA        | NA        | NA       | NA |
|                   | NA               | NA                | NA               | NA       | NA        | NA        | NA       | NA |
|                   | NA               | NA                | NA               | NA       | NA        | 0         | NA       | NA |
| Unknown           | NA               | Moffitt           | hs37d5           | 11       | 726072    | 726072    | +        | 0  |
|                   | SNP              | A                 | A                | G        | novel     | none      | MOF-MA1  | NA |
|                   | 0                | 0                 | 0                | 0        | 0         | 0         | Unknown  |    |
| Untested          | Somatic          | NA                | WXS              | none     | 0         | 0         |          |    |
| Illumina_NextSeq  | NA               | NA                | NA               | 0        | NA        | 0         | 0        | 0  |
|                   | 0                | 0                 | 0                | 0        | 0         | 0         | NA       | NA |
|                   | NA               | NA                | NA               | NA       | NA        | NA        | NA       | NA |
|                   | NA               | NA                | NA               | NA       | NA        | NA        | NA       | NA |
|                   | NA               | NA                | NA               | NA       | NA        | NA        | NA       | NA |
|                   | NA               | NA                | NA               | NA       | NA        | NA        | 0        | NA |
|                   | NA               | NA                | NA               | NA       | NA        | 0         | 0        | NA |
|                   | NA               | NA                | NA               | NA       | NA        | NA        | NA       | NA |
|                   | NA               | NA                | NA               | NA       | NA        | NA        | NA       | NA |
|                   | NA               | NA                | NA               | NA       | NA        | NA        | NA       | NA |
|                   | NA               | NA                | NA               | NA       | NA        | NA        | 0        | NA |
| Unknown           | NA               | Moffitt           | hs37d5           | 11       | 792800    | 792800    | +        | 0  |
|                   | INS              | T                 | T                | TG       | novel     | none      | MOF-MA1  | NA |



|                   |                  |                  |        |         |         |         |         |    |
|-------------------|------------------|------------------|--------|---------|---------|---------|---------|----|
|                   | 0                | 0                | 0      | 0       | 0       | 0       | Unknown |    |
| Untested Somatic  | NA               | WXS              | none   | 0       | 0       | 0       |         |    |
| Illumina_NextSeq  | NA               | NA               | 0      | NA      | 0       | 0       | 0       | 0  |
|                   | 0                | 0                | 0      | 0       | 0       | 0       | NA      | NA |
|                   | NA               | NA               | NA     | NA      | NA      | NA      | NA      | NA |
|                   | NA               | NA               | NA     | NA      | NA      | NA      | NA      | NA |
|                   | NA               | NA               | NA     | NA      | NA      | NA      | NA      | NA |
|                   | NA               | NA               | NA     | NA      | NA      | NA      | 0       | NA |
|                   | NA               | NA               | NA     | NA      | NA      | 0       | 0       | NA |
|                   | NA               | NA               | NA     | NA      | NA      | NA      | NA      | NA |
|                   | NA               | NA               | NA     | NA      | NA      | NA      | NA      | NA |
|                   | NA               | NA               | NA     | NA      | NA      | NA      | NA      | NA |
|                   | NA               | NA               | NA     | NA      | NA      | NA      | NA      | NA |
|                   | NA               | NA               | NA     | NA      | NA      | NA      | NA      | NA |
|                   | NA               | NA               | NA     | NA      | NA      | NA      | 0       |    |
| MOB2              | NA               | Moffitt          | hs37d5 | 11      | 1491488 | 1491488 | +       |    |
| Missense_Mutation |                  |                  | SNP    | C       | C       | T       | novel   |    |
| none              | MOF-MA1          | NA               | 0      | 0       | 0       | 0       | 0       | 0  |
|                   | Unknown          | Untested Somatic | NA     | WXS     | none    | 0       | 0       | 0  |
|                   | Illumina_NextSeq | NA               | NA     | c.G721A | NA      | p.G241R |         |    |
| NM_001172223      | exon5            | 0                | 0      | 0       | 0       | 0       | 0       | 0  |
|                   | NA               | NA               | NA     | NA      | NA      | NA      | NA      | NA |
|                   | NA               | NA               | NA     | NA      | NA      | NA      | NA      | NA |
|                   | NA               | NA               | NA     | NA      | NA      | NA      | NA      | NA |
|                   | NA               | NA               | NA     | NA      | NA      | NA      | NA      | NA |
|                   | 0                | NA               | NA     | NA      | NA      | NA      | NA      | 0  |
|                   | 0                | NA               | NA     | NA      | NA      | NA      | NA      | NA |
|                   | NA               | NA               | NA     | NA      | NA      | NA      | NA      | NA |
|                   | NA               | NA               | NA     | NA      | NA      | NA      | NA      | NA |
|                   | NA               | NA               | NA     | NA      | NA      | NA      | NA      | NA |
|                   | 0                |                  |        |         |         |         |         |    |
| MOB2              | NA               | Moffitt          | hs37d5 | 11      | 1501964 | 1501964 | +       |    |
| Missense_Mutation |                  |                  | SNP    | C       | C       | G       | novel   |    |
| none              | MOF-MA1          | NA               | 0      | 0       | 0       | 0       | 0       | 0  |
|                   | Unknown          | Untested Somatic | NA     | WXS     | none    | 0       | 0       | 0  |
|                   | Illumina_NextSeq | NA               | NA     | c.G262C | NA      | p.A88P  |         |    |
| NM_001172223      | exon2            | 0                | 0      | 0       | 0       | 0       | 0       | 0  |
|                   | NA               | NA               | NA     | NA      | NA      | NA      | NA      | NA |
|                   | NA               | NA               | NA     | NA      | NA      | NA      | NA      | NA |
|                   | NA               | NA               | NA     | NA      | NA      | NA      | NA      | NA |
|                   | NA               | NA               | NA     | NA      | NA      | NA      | NA      | NA |
|                   | 0                | NA               | NA     | NA      | NA      | NA      | NA      | 0  |
|                   | 0                | NA               | NA     | NA      | NA      | NA      | NA      | NA |
|                   | NA               | NA               | NA     | NA      | NA      | NA      | NA      | NA |
|                   | NA               | NA               | NA     | NA      | NA      | NA      | NA      | NA |
|                   | NA               | NA               | NA     | NA      | NA      | NA      | NA      | NA |
|                   | 0                |                  |        |         |         |         |         |    |
| Unknown           | NA               | Moffitt          | hs37d5 | 11      | 5291005 | 5291005 | +       | 0  |
|                   | SNP              | C                | C      | A       | novel   | none    | MOF-AM5 | NA |
|                   | 0                | 0                | 0      | 0       | 0       | 0       | Unknown |    |
| Untested Somatic  | NA               | WXS              | none   | 0       | 0       | 0       |         |    |
| Illumina_NextSeq  | NA               | NA               | 0      | NA      | 0       | 0       | 0       | 0  |





|                  |       |         |         |    |          |            |           |    |
|------------------|-------|---------|---------|----|----------|------------|-----------|----|
| IGSF22           | NA    | Moffitt | hs37d5  | 11 | 18740270 | 18740270 + |           |    |
| Silent           | SNP   | G       | G       | A  | novel    | none       | MOF-AM5   | NA |
|                  | 0     | 0       | 0       | 0  | 0        | 0          | Unknown   |    |
| Untested Somatic | NA    | WXS     | none    | 0  | 0        | 0          |           |    |
| Illumina_NextSeq | NA    | NA      | c.C702T | NA | NA       | p.I234I    | NM_173588 |    |
|                  | exon8 | 0       | 0       | 0  | 0        | 0          | 0         | NA |
|                  | NA    | NA      | NA      | NA | NA       | NA         | NA        | NA |
|                  | NA    | NA      | NA      | NA | NA       | NA         | NA        | NA |
|                  | NA    | NA      | NA      | NA | NA       | NA         | NA        | NA |
|                  | NA    | NA      | NA      | NA | NA       | NA         | NA        | 0  |
|                  | NA    | NA      | NA      | NA | NA       | NA         | 0         | 0  |
|                  | NA    | NA      | NA      | NA | NA       | NA         | NA        | NA |
|                  | NA    | NA      | NA      | NA | NA       | NA         | NA        | NA |
|                  | NA    | NA      | NA      | NA | NA       | NA         | NA        | NA |
|                  | NA    | NA      | NA      | NA | NA       | NA         | NA        | 0  |
| Unknown          | NA    | Moffitt | hs37d5  | 11 | 18741864 | 18741864 + |           | 0  |
|                  | SNP   | G       | G       | C  | novel    | none       | MOF-AM5   | NA |
|                  | 0     | 0       | 0       | 0  | 0        | 0          | Unknown   |    |
| Untested Somatic | NA    | WXS     | none    | 0  | 0        | 0          |           |    |
| Illumina_NextSeq | NA    | NA      | 0       | NA | 0        | 0          | 0         | 0  |
|                  | 0     | 0       | 0       | 0  | 0        | 0          | NA        | NA |
|                  | NA    | NA      | NA      | NA | NA       | NA         | NA        | NA |
|                  | NA    | NA      | NA      | NA | NA       | NA         | NA        | NA |
|                  | NA    | NA      | NA      | NA | NA       | NA         | NA        | NA |
|                  | NA    | NA      | NA      | NA | NA       | NA         | 0         | NA |
|                  | NA    | NA      | NA      | NA | NA       | 0          | 0         | NA |
|                  | NA    | NA      | NA      | NA | NA       | NA         | NA        | NA |
|                  | NA    | NA      | NA      | NA | NA       | NA         | NA        | NA |
|                  | NA    | NA      | NA      | NA | NA       | NA         | NA        | NA |
|                  | NA    | NA      | NA      | NA | NA       | NA         | NA        | NA |
|                  | NA    | NA      | NA      | NA | NA       | NA         | 0         | NA |
| Unknown          | NA    | Moffitt | hs37d5  | 11 | 18743628 | 18743628 + |           | 0  |
|                  | SNP   | G       | G       | C  | novel    | none       | MOF-AM5   | NA |
|                  | 0     | 0       | 0       | 0  | 0        | 0          | Unknown   |    |
| Untested Somatic | NA    | WXS     | none    | 0  | 0        | 0          |           |    |
| Illumina_NextSeq | NA    | NA      | 0       | NA | 0        | 0          | 0         | 0  |
|                  | 0     | 0       | 0       | 0  | 0        | 0          | NA        | NA |
|                  | NA    | NA      | NA      | NA | NA       | NA         | NA        | NA |
|                  | NA    | NA      | NA      | NA | NA       | NA         | NA        | NA |
|                  | NA    | NA      | NA      | NA | NA       | NA         | NA        | NA |
|                  | NA    | NA      | NA      | NA | NA       | NA         | 0         | NA |
|                  | NA    | NA      | NA      | NA | NA       | 0          | 0         | NA |
|                  | NA    | NA      | NA      | NA | NA       | NA         | NA        | NA |
|                  | NA    | NA      | NA      | NA | NA       | NA         | NA        | NA |
|                  | NA    | NA      | NA      | NA | NA       | NA         | NA        | NA |
|                  | NA    | NA      | NA      | NA | NA       | NA         | NA        | NA |
|                  | NA    | NA      | NA      | NA | NA       | NA         | 0         | NA |
| Unknown          | NA    | Moffitt | hs37d5  | 11 | 45928521 | 45928521 + |           | 0  |
|                  | SNP   | C       | C       | T  | novel    | none       | MOF-AM5   | NA |
|                  | 0     | 0       | 0       | 0  | 0        | 0          | Unknown   |    |
| Untested Somatic | NA    | WXS     | none    | 0  | 0        | 0          |           |    |
| Illumina_NextSeq | NA    | NA      | 0       | NA | 0        | 0          | 0         | 0  |





|                  |     |         |        |    |          |            |         |    |
|------------------|-----|---------|--------|----|----------|------------|---------|----|
| Unknown          | NA  | Moffitt | hs37d5 | 11 | 64004736 | 64004736 + | 0       |    |
|                  | SNP | A       | A      | G  | novel    | none       | MOF-MA1 | NA |
|                  | 0   | 0       | 0      | 0  | 0        | 0          | Unknown |    |
| Untested Somatic | NA  | WXS     | none   | 0  | 0        | 0          |         |    |
| Illumina_NextSeq | NA  | NA      | 0      | NA | 0        | 0          | 0       | 0  |
|                  | 0   | 0       | 0      | 0  | 0        | 0          | NA      | NA |
|                  | NA  | NA      | NA     | NA | NA       | NA         | NA      | NA |
|                  | NA  | NA      | NA     | NA | NA       | NA         | NA      | NA |
|                  | NA  | NA      | NA     | NA | NA       | NA         | 0       | NA |
|                  | NA  | NA      | NA     | NA | NA       | 0          | 0       | NA |
|                  | NA  | NA      | NA     | NA | NA       | NA         | NA      | NA |
|                  | NA  | NA      | NA     | NA | NA       | NA         | NA      | NA |
|                  | NA  | NA      | NA     | NA | NA       | NA         | NA      | NA |
|                  | NA  | NA      | NA     | NA | NA       | NA         | 0       | NA |
| Unknown          | NA  | Moffitt | hs37d5 | 11 | 64073091 | 64073091 + | 0       |    |
|                  | SNP | T       | T      | G  | novel    | none       | MOF-MA1 | NA |
|                  | 0   | 0       | 0      | 0  | 0        | 0          | Unknown |    |
| Untested Somatic | NA  | WXS     | none   | 0  | 0        | 0          |         |    |
| Illumina_NextSeq | NA  | NA      | 0      | NA | 0        | 0          | 0       | 0  |
|                  | 0   | 0       | 0      | 0  | 0        | 0          | NA      | NA |
|                  | NA  | NA      | NA     | NA | NA       | NA         | NA      | NA |
|                  | NA  | NA      | NA     | NA | NA       | NA         | NA      | NA |
|                  | NA  | NA      | NA     | NA | NA       | NA         | NA      | NA |
|                  | NA  | NA      | NA     | NA | NA       | NA         | 0       | NA |
|                  | NA  | NA      | NA     | NA | NA       | 0          | 0       | NA |
|                  | NA  | NA      | NA     | NA | NA       | NA         | NA      | NA |
|                  | NA  | NA      | NA     | NA | NA       | NA         | NA      | NA |
|                  | NA  | NA      | NA     | NA | NA       | NA         | NA      | NA |
|                  | NA  | NA      | NA     | NA | NA       | NA         | NA      | NA |
|                  | NA  | NA      | NA     | NA | NA       | NA         | 0       | NA |
| Unknown          | NA  | Moffitt | hs37d5 | 11 | 64326593 | 64326593 + | 0       |    |
|                  | SNP | C       | C      | T  | novel    | none       | MOF-MA1 | NA |
|                  | 0   | 0       | 0      | 0  | 0        | 0          | Unknown |    |
| Untested Somatic | NA  | WXS     | none   | 0  | 0        | 0          |         |    |
| Illumina_NextSeq | NA  | NA      | 0      | NA | 0        | 0          | 0       | 0  |
|                  | 0   | 0       | 0      | 0  | 0        | 0          | NA      | NA |
|                  | NA  | NA      | NA     | NA | NA       | NA         | NA      | NA |
|                  | NA  | NA      | NA     | NA | NA       | NA         | NA      | NA |
|                  | NA  | NA      | NA     | NA | NA       | NA         | NA      | NA |
|                  | NA  | NA      | NA     | NA | NA       | NA         | 0       | NA |
|                  | NA  | NA      | NA     | NA | NA       | 0          | 0       | NA |
|                  | NA  | NA      | NA     | NA | NA       | NA         | NA      | NA |
|                  | NA  | NA      | NA     | NA | NA       | NA         | NA      | NA |
|                  | NA  | NA      | NA     | NA | NA       | NA         | NA      | NA |
|                  | NA  | NA      | NA     | NA | NA       | NA         | 0       | NA |
| Unknown          | NA  | Moffitt | hs37d5 | 11 | 64331731 | 64331731 + | 0       |    |
|                  | SNP | G       | G      | T  | novel    | none       | MOF-AM5 | NA |
|                  | 0   | 0       | 0      | 0  | 0        | 0          | Unknown |    |
| Untested Somatic | NA  | WXS     | none   | 0  | 0        | 0          |         |    |
| Illumina_NextSeq | NA  | NA      | 0      | NA | 0        | 0          | 0       | 0  |







|                   |                  |                   |                  |                  |           |          |           |    |
|-------------------|------------------|-------------------|------------------|------------------|-----------|----------|-----------|----|
|                   | NA               | NA                | NA               | NA               | NA        | NA       | 0         |    |
| Unknown           | NA               | Moffitt           | hs37d5           | 11               | 93797738  | 93797738 | +         | 0  |
|                   | SNP              | G                 | G                | A                | novel     | none     | MOF-MA1   | NA |
|                   | 0                | 0                 | 0                | 0                | 0         | 0        | Unknown   |    |
| Untested Somatic  | NA               | WXS               | none             | 0                | 0         | 0        |           |    |
| Illumina_NextSeq  | NA               | NA                | 0                | NA               | 0         | 0        | 0         | 0  |
|                   | 0                | 0                 | 0                | 0                | 0         | 0        | NA        | NA |
|                   | NA               | NA                | NA               | NA               | NA        | NA       | NA        | NA |
|                   | NA               | NA                | NA               | NA               | NA        | NA       | NA        | NA |
|                   | NA               | NA                | NA               | NA               | NA        | NA       | NA        | NA |
|                   | NA               | NA                | NA               | NA               | NA        | NA       | 0         | NA |
|                   | NA               | NA                | NA               | NA               | NA        | 0        | 0         | NA |
|                   | NA               | NA                | NA               | NA               | NA        | NA       | NA        | NA |
|                   | NA               | NA                | NA               | NA               | NA        | NA       | NA        | NA |
|                   | NA               | NA                | NA               | NA               | NA        | NA       | NA        | NA |
|                   | NA               | NA                | NA               | NA               | NA        | NA       | 0         |    |
| ATM               | NA               | Moffitt           | hs37d5           | 11               | 108164127 |          | 108164127 |    |
|                   | +                | Missense_Mutation |                  |                  | SNP       | G        | G         | C  |
|                   | novel            | none              | MOF-MA1          | NA               | 0         | 0        | 0         | 0  |
|                   | 0                | 0                 | Unknown          | Untested Somatic | NA        | WXS      |           |    |
| none              | 0                | 0                 | Illumina_NextSeq | NA               | NA        | c.G4699C | NA        |    |
|                   | p.D1567H         | NM_000051         | exon31           | 0                | 0         | 0        | 0         | 0  |
|                   | 0                | 0                 | NA               | NA               | NA        | NA       | NA        | NA |
|                   | NA               | NA                | NA               | NA               | NA        | NA       | NA        | NA |
|                   | NA               | NA                | NA               | NA               | NA        | NA       | NA        | NA |
|                   | NA               | NA                | NA               | NA               | NA        | NA       | NA        | NA |
| possibly_damaging |                  |                   | NA               | NA               | NA        | 0        | NA        | NA |
|                   | NA               | NA                | NA               | NA               | 0         | 0        | NA        | NA |
|                   | NA               | NA                | NA               | NA               | NA        | NA       | NA        | NA |
|                   | NA               | NA                | NA               | NA               | NA        | NA       | NA        | NA |
|                   | NA               | NA                | NA               | NA               | NA        | NA       | NA        | NA |
|                   | NA               | NA                | NA               | NA               | NA        | 0        |           |    |
| Unknown           | NA               | Moffitt           | hs37d5           | 11               | 111583140 |          | 111583140 |    |
|                   | +                | 0                 | SNP              | G                | G         | A        | novel     |    |
| none              | MOF-MA1          | NA                | 0                | 0                | 0         | 0        | 0         | 0  |
|                   | Unknown          | Untested Somatic  | NA               | WXS              | none      | 0        | 0         | 0  |
|                   | Illumina_NextSeq | NA                | NA               | 0                | NA        | 0        | 0         | NA |
|                   | 0                | 0                 | 0                | 0                | 0         | 0        | 0         | NA |
|                   | NA               | NA                | NA               | NA               | NA        | NA       | NA        | NA |
|                   | NA               | NA                | NA               | NA               | NA        | NA       | NA        | NA |
|                   | NA               | NA                | NA               | NA               | NA        | NA       | NA        | NA |
|                   | NA               | NA                | NA               | NA               | NA        | NA       | NA        | 0  |
|                   | NA               | NA                | NA               | NA               | NA        | NA       | 0.000000  |    |
| 0.000233          | NA               | NA                | NA               | NA               | NA        | NA       | NA        | NA |
|                   | NA               | NA                | NA               | NA               | NA        | NA       | NA        | NA |
|                   | NA               | NA                | NA               | NA               | NA        | NA       | NA        | NA |
|                   | NA               | NA                | NA               | NA               | NA        | NA       | NA        | 0  |
| Unknown           | NA               | Moffitt           | hs37d5           | 11               | 113114175 |          | 113114175 |    |
|                   | +                | 0                 | SNP              | C                | C         | G        | novel     |    |
| none              | MOF-MA1          | NA                | 0                | 0                | 0         | 0        | 0         | 0  |







|                   |                  |                  |        |        |          |          |         |    |
|-------------------|------------------|------------------|--------|--------|----------|----------|---------|----|
| Unknown           | NA               | Moffitt          | hs37d5 | 12     | 7085050  | 7085050  | +       | 0  |
|                   | SNP              | A                | A      | G      | novel    | none     | MOF-AM2 | NA |
|                   | 0                | 0                | 0      | 0      | 0        | 0        | Unknown |    |
| Untested Somatic  | NA               | WXS              | none   | 0      | 0        | 0        |         |    |
| Illumina_NextSeq  | NA               | NA               | 0      | NA     | 0        | 0        | 0       | 0  |
|                   | 0                | 0                | 0      | 0      | 0        | 0        | NA      | NA |
|                   | NA               | NA               | NA     | NA     | NA       | NA       | NA      | NA |
|                   | NA               | NA               | NA     | NA     | NA       | NA       | NA      | NA |
|                   | NA               | NA               | NA     | NA     | NA       | NA       | NA      | NA |
|                   | NA               | NA               | NA     | NA     | NA       | NA       | 0       | NA |
|                   | NA               | NA               | NA     | NA     | NA       | 0        | 0       | NA |
|                   | NA               | NA               | NA     | NA     | NA       | NA       | NA      | NA |
|                   | NA               | NA               | NA     | NA     | NA       | NA       | NA      | NA |
|                   | NA               | NA               | NA     | NA     | NA       | NA       | NA      | NA |
|                   | NA               | NA               | NA     | NA     | NA       | NA       | 0       |    |
| CLEC1A            | NA               | Moffitt          | hs37d5 | 12     | 10251475 | 10251475 | +       |    |
| Missense_Mutation |                  | SNP              | C      | C      | C        | T        | novel   |    |
| none              | MOF-AM2          | NA               | 0      | 0      | 0        | 0        | 0       | 0  |
|                   | Unknown          | Untested Somatic | NA     | WXS    | none     | 0        | 0       | 0  |
|                   | Illumina_NextSeq | NA               | NA     | c.G47A | NA       | p.G16E   |         |    |
| NM_016511         | exon1            | 0                | 0      | 0      | 0        | 0        | 0       | 0  |
|                   | NA               | NA               | NA     | NA     | NA       | NA       | NA      | NA |
|                   | NA               | NA               | NA     | NA     | NA       | NA       | NA      | NA |
|                   | NA               | NA               | NA     | NA     | NA       | NA       | NA      | NA |
|                   | NA               | NA               | NA     | NA     | benign   | NA       | NA      | NA |
|                   | 0                | NA               | NA     | NA     | NA       | NA       | NA      | 0  |
|                   | 0                | NA               | NA     | NA     | NA       | NA       | NA      | NA |
|                   | NA               | NA               | NA     | NA     | NA       | NA       | NA      | NA |
|                   | NA               | NA               | NA     | NA     | NA       | NA       | NA      | NA |
|                   | NA               | NA               | NA     | NA     | NA       | NA       | NA      | NA |
|                   | 0                |                  |        |        |          |          |         |    |
| Unknown           | NA               | Moffitt          | hs37d5 | 12     | 11905298 | 11905298 | +       | 0  |
|                   | SNP              | C                | C      | G      | novel    | none     | MOF-MA1 | NA |
|                   | 0                | 0                | 0      | 0      | 0        | 0        | Unknown |    |
| Untested Somatic  | NA               | WXS              | none   | 0      | 0        | 0        |         |    |
| Illumina_NextSeq  | NA               | NA               | 0      | NA     | 0        | 0        | 0       | 0  |
|                   | 0                | 0                | 0      | 0      | 0        | 0        | NA      | NA |
|                   | NA               | NA               | NA     | NA     | NA       | NA       | NA      | NA |
|                   | NA               | NA               | NA     | NA     | NA       | NA       | NA      | NA |
|                   | NA               | NA               | NA     | NA     | NA       | NA       | NA      | NA |
|                   | NA               | NA               | NA     | NA     | NA       | NA       | 0       | NA |
|                   | NA               | NA               | NA     | NA     | NA       | 0        | 0       | NA |
|                   | NA               | NA               | NA     | NA     | NA       | NA       | NA      | NA |
|                   | NA               | NA               | NA     | NA     | NA       | NA       | NA      | NA |
|                   | NA               | NA               | NA     | NA     | NA       | NA       | NA      | NA |
|                   | NA               | NA               | NA     | NA     | NA       | NA       | NA      | NA |
|                   | NA               | NA               | NA     | NA     | NA       | NA       | 0       |    |
| SLC01A2           | NA               | Moffitt          | hs37d5 | 12     | 21467576 | 21467576 | +       |    |
| Missense_Mutation |                  | SNP              | G      | G      | G        | C        | novel   |    |
| none              | MOF-MA1          | NA               | 0      | 0      | 0        | 0        | 0       | 0  |
|                   | Unknown          | Untested Somatic | NA     | WXS    | none     | 0        | 0       | 0  |

|                  |                  |         |         |         |                   |            |           |
|------------------|------------------|---------|---------|---------|-------------------|------------|-----------|
|                  | Illumina_NextSeq | NA      | NA      | c.C242G | NA                | p.T81S     |           |
| NM_134431        | exon5            | 0       | 0       | 0       | 0                 | 0          | 0         |
|                  | NA               | NA      | NA      | NA      | NA                | NA         | NA        |
|                  | NA               | NA      | NA      | NA      | NA                | NA         | NA        |
|                  | NA               | NA      | NA      | NA      | NA                | NA         | NA        |
|                  | NA               | NA      | NA      | NA      | possibly_damaging |            | NA        |
|                  | NA               | 0       | NA      | NA      | NA                | NA         | NA        |
|                  | NA               | 0       | NA      | NA      | NA                | NA         | NA        |
|                  | NA               | NA      | NA      | NA      | NA                | NA         | NA        |
|                  | NA               | NA      | NA      | NA      | NA                | NA         | NA        |
|                  | NA               | NA      | NA      | NA      | NA                | NA         | NA        |
|                  | NA               | NA      | NA      | NA      | NA                | NA         | NA        |
|                  | NA               | 0       | NA      | NA      | NA                | NA         | NA        |
| Unknown          | NA               | Moffitt | hs37d5  | 12      | 21623298          | 21623298 + | 0         |
|                  | SNP              | A       | A       | T       | novel             | none       | MOF-AM6   |
|                  | 0                | 0       | 0       | 0       | 0                 | 0          | Unknown   |
| Untested Somatic | NA               | WXS     | none    | 0       | 0                 |            |           |
| Illumina_NextSeq | NA               | NA      | 0       | NA      | 0                 | 0          | 0         |
|                  | 0                | 0       | 0       | 0       | 0                 | 0          | NA        |
|                  | NA               | NA      | NA      | NA      | NA                | NA         | NA        |
|                  | NA               | NA      | NA      | NA      | NA                | NA         | NA        |
|                  | NA               | NA      | NA      | NA      | NA                | NA         | NA        |
|                  | NA               | NA      | NA      | NA      | NA                | NA         | 0         |
|                  | NA               | NA      | NA      | NA      | NA                | 0          | 0         |
|                  | NA               | NA      | NA      | NA      | NA                | NA         | NA        |
|                  | NA               | NA      | NA      | NA      | NA                | NA         | NA        |
|                  | NA               | NA      | NA      | NA      | NA                | NA         | NA        |
|                  | NA               | NA      | NA      | NA      | NA                | NA         | 0         |
| BCAT1            | NA               | Moffitt | hs37d5  | 12      | 25054784          | 25054784 + |           |
| Silent           | SNP              | T       | T       | A       | novel             | none       | MOF-MA1   |
|                  | 0                | 0       | 0       | 0       | 0                 | 0          | Unknown   |
| Untested Somatic | NA               | WXS     | none    | 0       | 0                 |            |           |
| Illumina_NextSeq | NA               | NA      | c.A78T  | NA      | NA                | p.G26G     |           |
| NM_001178093     | exon2            | 0       | 0       | 0       | 0                 | 0          | 0         |
|                  | NA               | NA      | NA      | NA      | NA                | NA         | NA        |
|                  | NA               | NA      | NA      | NA      | NA                | NA         | NA        |
|                  | NA               | NA      | NA      | NA      | NA                | NA         | NA        |
|                  | NA               | NA      | NA      | NA      | NA                | NA         | NA        |
|                  | 0                | NA      | NA      | NA      | NA                | NA         | 0         |
|                  | 0                | NA      | NA      | NA      | NA                | NA         | NA        |
|                  | NA               | NA      | NA      | NA      | NA                | NA         | NA        |
|                  | NA               | NA      | NA      | NA      | NA                | NA         | NA        |
|                  | NA               | NA      | NA      | NA      | NA                | NA         | NA        |
|                  | 0                |         |         |         |                   |            |           |
| SSPN             | NA               | Moffitt | hs37d5  | 12      | 26377243          | 26377243 + |           |
| Silent           | SNP              | T       | T       | C       | novel             | none       | MOF-AM5   |
|                  | 0                | 0       | 0       | 0       | 0                 | 0          | Unknown   |
| Untested Somatic | NA               | WXS     | none    | 0       | 0                 |            |           |
| Illumina_NextSeq | NA               | NA      | c.T297C | NA      | NA                | p.Y99Y     | NM_005086 |
|                  | exon2            | 0       | 0       | 0       | 0                 | 0          | 0         |
|                  | NA               | NA      | NA      | NA      | NA                | NA         | NA        |

|                   |                  |                  |        |         |                   |            |         |    |
|-------------------|------------------|------------------|--------|---------|-------------------|------------|---------|----|
|                   | NA               | NA               | NA     | NA      | NA                | NA         | NA      | NA |
|                   | NA               | NA               | NA     | NA      | NA                | NA         | NA      | NA |
|                   | NA               | NA               | NA     | NA      | NA                | NA         | NA      | 0  |
|                   | NA               | NA               | NA     | NA      | NA                | NA         | 0       | 0  |
|                   | NA               | NA               | NA     | NA      | NA                | NA         | NA      | NA |
|                   | NA               | NA               | NA     | NA      | NA                | NA         | NA      | NA |
|                   | NA               | NA               | NA     | NA      | NA                | NA         | NA      | NA |
|                   | NA               | NA               | NA     | NA      | NA                | NA         | NA      | 0  |
| Unknown           | NA               | Moffitt          | hs37d5 | 12      | 29819178          | 29819178 + |         | 0  |
|                   | SNP              | G                | G      | T       | novel             | none       | MOF-AM6 | NA |
|                   | 0                | 0                | 0      | 0       | 0                 | 0          | Unknown |    |
| Untested Somatic  | NA               | WXS              | none   |         | 0                 | 0          |         |    |
| Illumina_NextSeq  | NA               | NA               | 0      | NA      | 0                 | 0          | 0       | 0  |
|                   | 0                | 0                | 0      | 0       | 0                 | 0          | NA      | NA |
|                   | NA               | NA               | NA     | NA      | NA                | NA         | NA      | NA |
|                   | NA               | NA               | NA     | NA      | NA                | NA         | NA      | NA |
|                   | NA               | NA               | NA     | NA      | NA                | NA         | NA      | NA |
|                   | NA               | NA               | NA     | NA      | NA                | NA         | 0       | NA |
|                   | NA               | NA               | NA     | NA      | NA                | 0          | 0       | NA |
|                   | NA               | NA               | NA     | NA      | NA                | NA         | NA      | NA |
|                   | NA               | NA               | NA     | NA      | NA                | NA         | NA      | NA |
|                   | NA               | NA               | NA     | NA      | NA                | NA         | NA      | NA |
|                   | NA               | NA               | NA     | NA      | NA                | NA         | 0       | NA |
| DDX11             | NA               | Moffitt          | hs37d5 | 12      | 31237978          | 31237978 + |         |    |
| Missense_Mutation |                  |                  | SNP    | C       | C                 | T          | novel   |    |
| none              | MOF-AM5          | NA               | 0      | 0       | 0                 | 0          | 0       | 0  |
|                   | Unknown          | Untested Somatic | NA     | WXS     | none              | 0          | 0       | 0  |
|                   | Illumina_NextSeq | NA               | NA     | c.C556T | NA                | p.R186W    |         |    |
| NM_152438         | exon5            | 0                | 0      | 0       | 0                 | 0          | 0       | 0  |
|                   | NA               | NA               | NA     | NA      | NA                | NA         | NA      | NA |
|                   | NA               | NA               | NA     | NA      | NA                | NA         | NA      | NA |
|                   | NA               | NA               | NA     | NA      | NA                | NA         | NA      | NA |
|                   | NA               | NA               | NA     | NA      | possibly_damaging |            |         | NA |
|                   | NA               | NA               | 0      | NA      | NA                | NA         | NA      | NA |
|                   | NA               | 0                | 0      | NA      | NA                | NA         | NA      | NA |
|                   | NA               | NA               | NA     | NA      | NA                | NA         | NA      | NA |
|                   | NA               | NA               | NA     | NA      | NA                | NA         | NA      | NA |
|                   | NA               | NA               | NA     | NA      | NA                | NA         | NA      | NA |
|                   | NA               | NA               | NA     | NA      | NA                | NA         | NA      | NA |
|                   | NA               | NA               | 0      |         |                   |            |         |    |
| Unknown           | NA               | Moffitt          | hs37d5 | 12      | 39726627          | 39726627 + |         | 0  |
|                   | SNP              | C                | C      | G       | novel             | none       | MOF-MA1 | NA |
|                   | 0                | 0                | 0      | 0       | 0                 | 0          | Unknown |    |
| Untested Somatic  | NA               | WXS              | none   |         | 0                 | 0          |         |    |
| Illumina_NextSeq  | NA               | NA               | 0      | NA      | 0                 | 0          | 0       | 0  |
|                   | 0                | 0                | 0      | 0       | 0                 | 0          | NA      | NA |
|                   | NA               | NA               | NA     | NA      | NA                | NA         | NA      | NA |
|                   | NA               | NA               | NA     | NA      | NA                | NA         | NA      | NA |
|                   | NA               | NA               | NA     | NA      | NA                | NA         | NA      | NA |
|                   | NA               | NA               | NA     | NA      | NA                | NA         | 0       | NA |
|                   | NA               | NA               | NA     | NA      | NA                | 0          | 0       | NA |





|                   |                  |                  |          |         |                   |           |         |    |
|-------------------|------------------|------------------|----------|---------|-------------------|-----------|---------|----|
| NCKAP1L           | NA               | Moffitt          | hs37d5   | 12      | 54925564          | 54925564  | +       |    |
| Silent            | SNP              | G                | G        | C       | novel             | none      | MOF-MA1 | NA |
|                   | 0                | 0                | 0        | 0       | 0                 | 0         | Unknown |    |
| Untested Somatic  | NA               | WXS              | none     | 0       | 0                 | 0         |         |    |
| Illumina_NextSeq  | NA               | NA               | c.G2736C | NA      | p.G912G           | NM_005337 |         |    |
|                   | exon25           | 0                | 0        | 0       | 0                 | 0         | 0       | NA |
|                   | NA               | NA               | NA       | NA      | NA                | NA        | NA      | NA |
|                   | NA               | NA               | NA       | NA      | NA                | NA        | NA      | NA |
|                   | NA               | NA               | NA       | NA      | NA                | NA        | NA      | NA |
|                   | NA               | NA               | NA       | NA      | NA                | NA        | NA      | 0  |
|                   | NA               | NA               | NA       | NA      | NA                | NA        | 0       | 0  |
|                   | NA               | NA               | NA       | NA      | NA                | NA        | NA      | NA |
|                   | NA               | NA               | NA       | NA      | NA                | NA        | NA      | NA |
|                   | NA               | NA               | NA       | NA      | NA                | NA        | NA      | NA |
|                   | NA               | NA               | NA       | NA      | NA                | NA        | NA      | NA |
|                   | NA               | NA               | NA       | NA      | NA                | NA        | NA      | 0  |
| ERBB3             | NA               | Moffitt          | hs37d5   | 12      | 56481627          | 56481627  | +       |    |
| Missense_Mutation |                  |                  | SNP      | C       | C                 | T         | novel   |    |
| none              | MOF-AM2          | NA               | 0        | 0       | 0                 | 0         | 0       | 0  |
|                   | Unknown          | Untested Somatic | NA       | WXS     | none              | 0         | 0       | 0  |
|                   | Illumina_NextSeq | NA               | NA       | c.C662T | NA                | p.P221L   |         |    |
| NM_001982         | exon6            | 0                | 0        | 0       | 0                 | 0         | 0       | 0  |
|                   | NA               | NA               | NA       | NA      | NA                | NA        | NA      | NA |
|                   | NA               | NA               | NA       | NA      | NA                | NA        | NA      | NA |
|                   | NA               | NA               | NA       | NA      | NA                | NA        | NA      | NA |
|                   | NA               | NA               | NA       | NA      | probably_damaging |           |         | NA |
|                   | NA               | NA               | 0        | NA      | NA                | NA        | NA      | NA |
|                   | NA               | 0                | 0        | NA      | NA                | NA        | NA      | NA |
|                   | NA               | NA               | NA       | NA      | NA                | NA        | NA      | NA |
|                   | NA               | NA               | NA       | NA      | NA                | NA        | NA      | NA |
|                   | NA               | NA               | NA       | NA      | NA                | NA        | NA      | NA |
|                   | NA               | NA               | NA       | NA      | NA                | NA        | NA      | NA |
|                   | NA               | NA               | 1        |         |                   |           |         |    |
| Unknown           | NA               | Moffitt          | hs37d5   | 12      | 56493858          | 56493858  | +       | 0  |
|                   | INS              | C                | C        | CA      | novel             | none      | MOF-AM5 | NA |
|                   | 0                | 0                | 0        | 0       | 0                 | 0         | Unknown |    |
| Untested Somatic  | NA               | WXS              | none     | 0       | 0                 | 0         |         |    |
| Illumina_NextSeq  | NA               | NA               | 0        | NA      | 0                 | 0         | 0       | 0  |
|                   | 0                | 0                | 0        | 0       | 0                 | 0         | NA      | NA |
|                   | NA               | NA               | NA       | NA      | NA                | NA        | NA      | NA |
|                   | NA               | NA               | NA       | NA      | NA                | NA        | NA      | NA |
|                   | NA               | NA               | NA       | NA      | NA                | NA        | NA      | NA |
|                   | NA               | NA               | NA       | NA      | NA                | NA        | 0       | NA |
|                   | NA               | NA               | NA       | NA      | NA                | 0         | 0       | NA |
|                   | NA               | NA               | NA       | NA      | NA                | NA        | NA      | NA |
|                   | NA               | NA               | NA       | NA      | NA                | NA        | NA      | NA |
|                   | NA               | NA               | NA       | NA      | NA                | NA        | NA      | NA |
|                   | NA               | NA               | NA       | NA      | NA                | NA        | NA      | NA |
|                   | NA               | NA               | NA       | NA      | NA                | NA        | 0       |    |
| MY01A             | NA               | Moffitt          | hs37d5   | 12      | 57430560          | 57430560  | +       |    |
| Nonsense_Mutation |                  |                  | SNP      | C       | C                 | T         | novel   |    |
| none              | MOF-MA1          | NA               | 0        | 0       | 0                 | 0         | 0       | 0  |
|                   | Unknown          | Untested Somatic | NA       | WXS     | none              | 0         | 0       | 0  |

|                  |                  |         |            |          |                   |            |           |
|------------------|------------------|---------|------------|----------|-------------------|------------|-----------|
|                  | Illumina_NextSeq | NA      | NA         | c.G2270A | NA                | p.W757X    |           |
| NM_005379        | exon21           | 0       | 0          | 0        | 0                 | 0          | 0         |
|                  | NA               | NA      | NA         | NA       | NA                | NA         | NA        |
|                  | NA               | NA      | NA         | NA       | NA                | NA         | NA        |
|                  | NA               | NA      | NA         | NA       | NA                | NA         | NA        |
|                  | NA               | NA      | NA         | NA       | possibly_damaging | NA         | NA        |
|                  | NA               | 0       | NA         | NA       | NA                | NA         | NA        |
|                  | NA               | 0       | NA         | NA       | NA                | NA         | NA        |
|                  | NA               | NA      | NA         | NA       | NA                | NA         | NA        |
|                  | NA               | NA      | NA         | NA       | NA                | NA         | NA        |
|                  | NA               | NA      | NA         | NA       | NA                | NA         | NA        |
|                  | NA               | 0       | NA         | NA       | NA                | NA         | NA        |
| Unknown          | NA               | Moffitt | hs37d5     | 12       | 57843830          | 57843831 + | 0         |
|                  | DEL              | AG      | AG         | A        | novel             | none       | MOF-AM2   |
|                  | 0                | 0       | 0          | 0        | 0                 | 0          | Unknown   |
| Untested Somatic | NA               | WXS     | none       | 0        | 0                 |            |           |
| Illumina_NextSeq | NA               | NA      | 0          | NA       | 0                 | 0          | 0         |
|                  | 0                | 0       | 0          | 0        | 0                 | 0          | NA        |
|                  | NA               | NA      | NA         | NA       | NA                | NA         | NA        |
|                  | NA               | NA      | NA         | NA       | NA                | NA         | NA        |
|                  | NA               | NA      | NA         | NA       | NA                | NA         | NA        |
|                  | NA               | NA      | NA         | NA       | NA                | NA         | 0         |
|                  | NA               | NA      | NA         | NA       | NA                | 0          | 0         |
|                  | NA               | NA      | NA         | NA       | NA                | NA         | NA        |
|                  | NA               | NA      | NA         | NA       | NA                | NA         | NA        |
|                  | NA               | NA      | NA         | NA       | NA                | NA         | 0         |
| GLI1             | NA               | Moffitt | hs37d5     | 12       | 57859014          | 57859014 + |           |
| Silent           | SNP              | C       | C          | T        | novel             | none       | MOF-MA1   |
|                  | 0                | 0       | 0          | 0        | 0                 | 0          | Unknown   |
| Untested Somatic | NA               | WXS     | none       | 0        | 0                 |            |           |
| Illumina_NextSeq | NA               | NA      | c.C510T    | NA       | NA                | p.S170S    | NM_005269 |
|                  | exon5            | 0       | 0          | 0        | 0                 | 0          | 0         |
|                  | NA               | NA      | NA         | NA       | NA                | NA         | NA        |
|                  | NA               | NA      | NA         | NA       | NA                | NA         | NA        |
|                  | NA               | NA      | NA         | NA       | NA                | NA         | NA        |
|                  | NA               | NA      | NA         | NA       | NA                | NA         | 0         |
|                  | NA               | NA      | NA         | NA       | NA                | NA         | 0         |
|                  | NA               | NA      | NA         | NA       | NA                | NA         | NA        |
|                  | NA               | NA      | NA         | NA       | NA                | NA         | NA        |
|                  | NA               | NA      | NA         | NA       | NA                | NA         | NA        |
|                  | NA               | NA      | NA         | NA       | NA                | NA         | 0         |
| TBK1             | NA               | Moffitt | hs37d5     | 12       | 64891037          | 64891038 + |           |
| Frame_Shift_Del  | DEL              | GA      | GA         | G        | novel             | none       |           |
| MOF-AM5          | NA               | 0       | 0          | 0        | 0                 | 0          | 0         |
| Unknown          | Untested Somatic | NA      | WXS        | none     | 0                 | 0          |           |
| Illumina_NextSeq | NA               | NA      | c.1958delA | NA       | NA                | p.E653fs   |           |
| NM_013254        | exon18           | 0       | 0          | 0        | 0                 | 0          | 0         |
|                  | NA               | NA      | NA         | NA       | NA                | NA         | NA        |
|                  | NA               | NA      | NA         | NA       | NA                | NA         | NA        |

|                   |                  |                  |        |        |                   |            |         |    |
|-------------------|------------------|------------------|--------|--------|-------------------|------------|---------|----|
|                   | NA               | NA               | NA     | NA     | NA                | NA         | NA      | NA |
|                   | NA               | NA               | NA     | NA     | NA                | NA         | NA      | NA |
|                   | 0                | NA               | NA     | NA     | NA                | NA         | NA      | 0  |
|                   | 0                | NA               | NA     | NA     | NA                | NA         | NA      | NA |
|                   | NA               | NA               | NA     | NA     | NA                | NA         | NA      | NA |
|                   | NA               | NA               | NA     | NA     | NA                | NA         | NA      | NA |
|                   | NA               | NA               | NA     | NA     | NA                | NA         | NA      | NA |
|                   | 0                |                  |        |        |                   |            |         |    |
| Unknown           | NA               | Moffitt          | hs37d5 | 12     | 65078691          | 65078691 + |         | 0  |
|                   | SNP              | C                | C      | G      | novel             | none       | MOF-MA1 | NA |
|                   | 0                | 0                | 0      | 0      | 0                 | 0          | Unknown |    |
| Untested Somatic  | NA               | WXS              | none   |        | 0                 | 0          |         |    |
| Illumina_NextSeq  | NA               | NA               | 0      | NA     | 0                 | 0          | 0       | 0  |
|                   | 0                | 0                | 0      | 0      | 0                 | 0          | NA      | NA |
|                   | NA               | NA               | NA     | NA     | NA                | NA         | NA      | NA |
|                   | NA               | NA               | NA     | NA     | NA                | NA         | NA      | NA |
|                   | NA               | NA               | NA     | NA     | NA                | NA         | NA      | NA |
|                   | NA               | NA               | NA     | NA     | NA                | NA         | 0       | NA |
|                   | NA               | NA               | NA     | NA     | NA                | 0          | 0       | NA |
|                   | NA               | NA               | NA     | NA     | NA                | NA         | NA      | NA |
|                   | NA               | NA               | NA     | NA     | NA                | NA         | NA      | NA |
|                   | NA               | NA               | NA     | NA     | NA                | NA         | NA      | NA |
|                   | NA               | NA               | NA     | NA     | NA                | NA         | 0       | NA |
| Unknown           | NA               | Moffitt          | hs37d5 | 12     | 65462461          | 65462461 + |         | 0  |
|                   | SNP              | G                | G      | A      | novel             | none       | MOF-AM2 | NA |
|                   | 0                | 0                | 0      | 0      | 0                 | 0          | Unknown |    |
| Untested Somatic  | NA               | WXS              | none   |        | 0                 | 0          |         |    |
| Illumina_NextSeq  | NA               | NA               | 0      | NA     | 0                 | 0          | 0       | 0  |
|                   | 0                | 0                | 0      | 0      | 0                 | 0          | NA      | NA |
|                   | NA               | NA               | NA     | NA     | NA                | NA         | NA      | NA |
|                   | NA               | NA               | NA     | NA     | NA                | NA         | NA      | NA |
|                   | NA               | NA               | NA     | NA     | NA                | NA         | NA      | NA |
|                   | NA               | NA               | NA     | NA     | NA                | NA         | 0       | NA |
|                   | NA               | NA               | NA     | NA     | NA                | 0          | 0       | NA |
|                   | NA               | NA               | NA     | NA     | NA                | NA         | NA      | NA |
|                   | NA               | NA               | NA     | NA     | NA                | NA         | NA      | NA |
|                   | NA               | NA               | NA     | NA     | NA                | NA         | NA      | NA |
|                   | NA               | NA               | NA     | NA     | NA                | NA         | 0       | NA |
| YEATS4            | NA               | Moffitt          | hs37d5 | 12     | 69753789          | 69753789 + |         |    |
| Missense_Mutation |                  |                  | SNP    | G      | G                 | C          | novel   |    |
| none              | MOF-MA1          | NA               | 0      | 0      | 0                 | 0          | 0       | 0  |
|                   | Unknown          | Untested Somatic | NA     | WXS    | none              | 0          | 0       | 0  |
|                   | Illumina_NextSeq | NA               | NA     | c.G37C | NA                | p.G13R     |         |    |
| NM_006530         | exon1            | 0                | 0      | 0      | 0                 | 0          | 0       | 0  |
|                   | NA               | NA               | NA     | NA     | NA                | NA         | NA      | NA |
|                   | NA               | NA               | NA     | NA     | NA                | NA         | NA      | NA |
|                   | NA               | NA               | NA     | NA     | NA                | NA         | NA      | NA |
|                   | NA               | NA               | NA     | NA     | probably_damaging |            |         | NA |
|                   | NA               | NA               | 0      | NA     | NA                | NA         | NA      | NA |
|                   | NA               | 0                | 0      | NA     | NA                | NA         | NA      | NA |

|                  |     |         |         |    |          |            |         |    |
|------------------|-----|---------|---------|----|----------|------------|---------|----|
|                  | NA  | NA      | NA      | NA | NA       | NA         | NA      | NA |
|                  | NA  | NA      | NA      | NA | NA       | NA         | NA      | NA |
|                  | NA  | NA      | NA      | NA | NA       | NA         | NA      | NA |
|                  | NA  | NA      | 0       |    |          |            |         |    |
| PTPRR            | NA  | Moffitt | hs37d5  | 12 | 71139645 | 71139645 + |         |    |
| Silent           | SNP | A       | A       | C  | novel    | none       | MOF-AM2 | NA |
|                  | 0   | 0       | 0       | 0  | 0        | 0          | Unknown |    |
| Untested Somatic | NA  | WXS     | none    | 0  | 0        |            |         |    |
| Illumina_NextSeq | NA  | NA      | c.T960G | NA | p.S320S  | NM_002849  |         |    |
| exon6            | 0   | 0       | 0       | 0  | 0        | 0          | 0       | NA |
|                  | NA  | NA      | NA      | NA | NA       | NA         | NA      | NA |
|                  | NA  | NA      | NA      | NA | NA       | NA         | NA      | NA |
|                  | NA  | NA      | NA      | NA | NA       | NA         | NA      | NA |
|                  | NA  | NA      | NA      | NA | NA       | NA         | NA      | 0  |
|                  | NA  | NA      | NA      | NA | NA       | NA         | 0       | 0  |
|                  | NA  | NA      | NA      | NA | NA       | NA         | NA      | NA |
|                  | NA  | NA      | NA      | NA | NA       | NA         | NA      | NA |
|                  | NA  | NA      | NA      | NA | NA       | NA         | NA      | NA |
|                  | NA  | NA      | NA      | NA | NA       | NA         | NA      | 0  |
| Unknown          | NA  | Moffitt | hs37d5  | 12 | 77157948 | 77157948 + |         | 0  |
|                  | SNP | C       | C       | G  | novel    | none       | MOF-MA1 | NA |
|                  | 0   | 0       | 0       | 0  | 0        | 0          | Unknown |    |
| Untested Somatic | NA  | WXS     | none    | 0  | 0        |            |         |    |
| Illumina_NextSeq | NA  | NA      | 0       | NA | 0        | 0          | 0       | 0  |
|                  | 0   | 0       | 0       | 0  | 0        | 0          | NA      | NA |
|                  | NA  | NA      | NA      | NA | NA       | NA         | NA      | NA |
|                  | NA  | NA      | NA      | NA | NA       | NA         | NA      | NA |
|                  | NA  | NA      | NA      | NA | NA       | NA         | NA      | NA |
|                  | NA  | NA      | NA      | NA | NA       | NA         | 0       | NA |
|                  | NA  | NA      | NA      | NA | NA       | 0          | 0       | NA |
|                  | NA  | NA      | NA      | NA | NA       | NA         | NA      | NA |
|                  | NA  | NA      | NA      | NA | NA       | NA         | NA      | NA |
|                  | NA  | NA      | NA      | NA | NA       | NA         | NA      | NA |
|                  | NA  | NA      | NA      | NA | NA       | NA         | 0       | NA |
|                  | NA  | NA      | NA      | NA | NA       | 0          | 0       | NA |
|                  | NA  | NA      | NA      | NA | NA       | NA         | NA      | NA |
|                  | NA  | NA      | NA      | NA | NA       | NA         | NA      | NA |
|                  | NA  | NA      | NA      | NA | NA       | NA         | 0       | NA |
| Unknown          | NA  | Moffitt | hs37d5  | 12 | 94244170 | 94244170 + |         | 0  |
|                  | SNP | G       | G       | A  | novel    | none       | MOF-MA1 | NA |
|                  | 0   | 0       | 0       | 0  | 0        | 0          | Unknown |    |
| Untested Somatic | NA  | WXS     | none    | 0  | 0        |            |         |    |
| Illumina_NextSeq | NA  | NA      | 0       | NA | 0        | 0          | 0       | 0  |
|                  | 0   | 0       | 0       | 0  | 0        | 0          | NA      | NA |
|                  | NA  | NA      | NA      | NA | NA       | NA         | NA      | NA |
|                  | NA  | NA      | NA      | NA | NA       | NA         | NA      | NA |
|                  | NA  | NA      | NA      | NA | NA       | NA         | NA      | NA |
|                  | NA  | NA      | NA      | NA | NA       | NA         | 0       | NA |
|                  | NA  | NA      | NA      | NA | NA       | 0          | 0       | NA |
|                  | NA  | NA      | NA      | NA | NA       | NA         | NA      | NA |
|                  | NA  | NA      | NA      | NA | NA       | NA         | NA      | NA |
|                  | NA  | NA      | NA      | NA | NA       | NA         | NA      | NA |
|                  | NA  | NA      | NA      | NA | NA       | NA         | 0       | NA |
| Unknown          | NA  | Moffitt | hs37d5  | 12 | 94676064 | 94676064 + |         | 0  |

|                  |         |                   |                  |                  |           |           |           |    |
|------------------|---------|-------------------|------------------|------------------|-----------|-----------|-----------|----|
|                  | SNP     | T                 | T                | G                | novel     | none      | MOF-MA1   | NA |
|                  | 0       | 0                 | 0                | 0                | 0         | 0         | Unknown   |    |
| Untested Somatic | NA      | NA                | WXS              | none             | 0         | 0         |           |    |
| Illumina_NextSeq | NA      | NA                | NA               | 0                | NA        | 0         | 0         | 0  |
|                  | 0       | 0                 | 0                | 0                | 0         | 0         | NA        | NA |
|                  | NA      | NA                | NA               | NA               | NA        | NA        | NA        | NA |
|                  | NA      | NA                | NA               | NA               | NA        | NA        | NA        | NA |
|                  | NA      | NA                | NA               | NA               | NA        | NA        | NA        | NA |
|                  | NA      | NA                | NA               | NA               | NA        | NA        | 0         | NA |
|                  | NA      | NA                | NA               | NA               | NA        | 0         | 0         | NA |
|                  | NA      | NA                | NA               | NA               | NA        | NA        | NA        | NA |
|                  | NA      | NA                | NA               | NA               | NA        | NA        | NA        | NA |
|                  | NA      | NA                | NA               | NA               | NA        | NA        | NA        | NA |
|                  | NA      | NA                | NA               | NA               | NA        | NA        | NA        | NA |
| Unknown          | NA      | Moffitt           | hs37d5           | 12               | 97885661  | 97885661+ |           | 0  |
|                  | SNP     | C                 | C                | T                | novel     | none      | MOF-MA1   | NA |
|                  | 0       | 0                 | 0                | 0                | 0         | 0         | Unknown   |    |
| Untested Somatic | NA      | NA                | WXS              | none             | 0         | 0         |           |    |
| Illumina_NextSeq | NA      | NA                | NA               | 0                | NA        | 0         | 0         | 0  |
|                  | 0       | 0                 | 0                | 0                | 0         | 0         | NA        | NA |
|                  | NA      | NA                | NA               | NA               | NA        | NA        | NA        | NA |
|                  | NA      | NA                | NA               | NA               | NA        | NA        | NA        | NA |
|                  | NA      | NA                | NA               | NA               | NA        | NA        | NA        | NA |
|                  | NA      | NA                | NA               | NA               | NA        | NA        | 0         | NA |
|                  | NA      | NA                | NA               | NA               | NA        | 0         | 0         | NA |
|                  | NA      | NA                | NA               | NA               | NA        | NA        | NA        | NA |
|                  | NA      | NA                | NA               | NA               | NA        | NA        | NA        | NA |
|                  | NA      | NA                | NA               | NA               | NA        | NA        | NA        | NA |
|                  | NA      | NA                | NA               | NA               | NA        | NA        | NA        | NA |
| Unknown          | NA      | Moffitt           | hs37d5           | 12               | 98931133  | 98931133+ |           | 0  |
|                  | SNP     | A                 | A                | G                | novel     | none      | MOF-AM2   | NA |
|                  | 0       | 0                 | 0                | 0                | 0         | 0         | Unknown   |    |
| Untested Somatic | NA      | NA                | WXS              | none             | 0         | 0         |           |    |
| Illumina_NextSeq | NA      | NA                | NA               | 0                | NA        | 0         | 0         | 0  |
|                  | 0       | 0                 | 0                | 0                | 0         | 0         | NA        | NA |
|                  | NA      | NA                | NA               | NA               | NA        | NA        | NA        | NA |
|                  | NA      | NA                | NA               | NA               | NA        | NA        | NA        | NA |
|                  | NA      | NA                | NA               | NA               | NA        | NA        | NA        | NA |
|                  | NA      | NA                | NA               | NA               | NA        | NA        | 0         | NA |
|                  | NA      | NA                | NA               | NA               | NA        | 0         | 0         | NA |
|                  | NA      | NA                | NA               | NA               | NA        | NA        | NA        | NA |
|                  | NA      | NA                | NA               | NA               | NA        | NA        | NA        | NA |
|                  | NA      | NA                | NA               | NA               | NA        | NA        | NA        | NA |
|                  | NA      | NA                | NA               | NA               | NA        | NA        | 0         |    |
| BRAP             | NA      | Moffitt           | hs37d5           | 12               | 112119446 |           | 112119446 |    |
|                  | +       | Missense_Mutation |                  |                  | SNP       | C         | C         | G  |
|                  | novel   | none              | MOF-MA1          | NA               | 0         | 0         | 0         | 0  |
|                  | 0       | 0                 | Unknown          | Untested Somatic | NA        |           | WXS       |    |
| none             | 0       | 0                 | Illumina_NextSeq | NA               | NA        |           | c.G438C   | NA |
|                  | p.K146N | NM_006768         | exon3            |                  | 0         | 0         | 0         | 0  |







|                          |       |         |            |    |          |            |         |    |
|--------------------------|-------|---------|------------|----|----------|------------|---------|----|
|                          | NA    | NA      | NA         | NA | NA       | NA         | NA      | NA |
|                          | NA    | NA      | NA         | NA | NA       | NA         | NA      | NA |
|                          | 0     |         |            |    |          |            |         |    |
| Unknown                  | NA    | Moffitt | hs37d5     | 13 | 21237619 | 21237619 + |         | 0  |
|                          | SNP   | G       | G          | T  | novel    | none       | MOF-MA1 | NA |
|                          | 0     | 0       | 0          | 0  | 0        | 0          | Unknown |    |
| Untested Somatic         | NA    | WXS     | none       |    | 0        | 0          |         |    |
| Illumina_NextSeq         | NA    | NA      | 0          | 0  | NA       | 0          | 0       | 0  |
|                          | 0     | 0       | 0          | 0  | 0        | 0          | NA      | NA |
|                          | NA    | NA      | NA         | NA | NA       | NA         | NA      | NA |
|                          | NA    | NA      | NA         | NA | NA       | NA         | NA      | NA |
|                          | NA    | NA      | NA         | NA | NA       | NA         | NA      | NA |
|                          | NA    | NA      | NA         | NA | NA       | NA         | 0       | NA |
|                          | NA    | NA      | NA         | NA | NA       | 0          | 0       | NA |
|                          | NA    | NA      | NA         | NA | NA       | NA         | NA      | NA |
|                          | NA    | NA      | NA         | NA | NA       | NA         | NA      | NA |
|                          | NA    | NA      | NA         | NA | NA       | NA         | NA      | NA |
|                          | NA    | NA      | NA         | NA | NA       | NA         | 0       | NA |
| LATS2                    | NA    | Moffitt | hs37d5     | 13 | 21562053 | 21562054 + |         |    |
| Frame_Shift_Del          | DEL   | GT      | GT         | G  | novel    | none       |         |    |
| MOF-MA1                  | NA    | 0       | 0          | 0  | 0        | 0          | 0       |    |
| Unknown Untested Somatic | NA    | WXS     | none       |    | 0        | 0          |         |    |
| Illumina_NextSeq         | NA    | NA      | c.1865delA |    | NA       | p.N622fs   |         |    |
| NM_014572                | exon4 | 0       | 0          | 0  | 0        | 0          | 0       | 0  |
|                          | NA    | NA      | NA         | NA | NA       | NA         | NA      | NA |
|                          | NA    | NA      | NA         | NA | NA       | NA         | NA      | NA |
|                          | NA    | NA      | NA         | NA | NA       | NA         | NA      | NA |
|                          | NA    | NA      | NA         | NA | NA       | NA         | NA      | NA |
|                          | 0     | NA      | NA         | NA | NA       | NA         | NA      | 0  |
|                          | 0     | NA      | NA         | NA | NA       | NA         | NA      | NA |
|                          | NA    | NA      | NA         | NA | NA       | NA         | NA      | NA |
|                          | NA    | NA      | NA         | NA | NA       | NA         | NA      | NA |
|                          | NA    | NA      | NA         | NA | NA       | NA         | NA      | NA |
|                          | 0     |         |            |    |          |            |         |    |
| Unknown                  | NA    | Moffitt | hs37d5     | 13 | 27250861 | 27250863 + |         | 0  |
|                          | DEL   | GGT     | GGT        | G  | novel    | none       | MOF-AM2 | NA |
|                          | 0     | 0       | 0          | 0  | 0        | 0          | Unknown |    |
| Untested Somatic         | NA    | WXS     | none       |    | 0        | 0          |         |    |
| Illumina_NextSeq         | NA    | NA      | 0          | 0  | NA       | 0          | 0       | 0  |
|                          | 0     | 0       | 0          | 0  | 0        | 0          | NA      | NA |
|                          | NA    | NA      | NA         | NA | NA       | NA         | NA      | NA |
|                          | NA    | NA      | NA         | NA | NA       | NA         | NA      | NA |
|                          | NA    | NA      | NA         | NA | NA       | NA         | NA      | NA |
|                          | NA    | NA      | NA         | NA | NA       | NA         | 0       | NA |
|                          | NA    | NA      | NA         | NA | NA       | 0          | 0       | NA |
|                          | NA    | NA      | NA         | NA | NA       | NA         | NA      | NA |
|                          | NA    | NA      | NA         | NA | NA       | NA         | NA      | NA |
|                          | NA    | NA      | NA         | NA | NA       | NA         | NA      | NA |
|                          | NA    | NA      | NA         | NA | NA       | NA         | 0       | NA |
| Unknown                  | NA    | Moffitt | hs37d5     | 13 | 40298764 | 40298764 + |         | 0  |



|                   |                  |                  |        |        |                   |          |         |    |
|-------------------|------------------|------------------|--------|--------|-------------------|----------|---------|----|
|                   | NA               | NA               | NA     | NA     | NA                | NA       | NA      | NA |
|                   | NA               | NA               | NA     | NA     | NA                | NA       | NA      | NA |
|                   | NA               | NA               | NA     | NA     | NA                | NA       | NA      | NA |
|                   | NA               | NA               | NA     | NA     | NA                | NA       | 0       | NA |
|                   | NA               | NA               | NA     | NA     | NA                | 0        | 0       | NA |
|                   | NA               | NA               | NA     | NA     | NA                | NA       | NA      | NA |
|                   | NA               | NA               | NA     | NA     | NA                | NA       | NA      | NA |
|                   | NA               | NA               | NA     | NA     | NA                | NA       | NA      | NA |
|                   | NA               | NA               | NA     | NA     | NA                | NA       | 0       | NA |
| Unknown           | NA               | Moffitt          | hs37d5 | 13     | 50098437          | 50098437 | +       | 0  |
|                   | SNP              | A                | A      | G      | novel             | none     | MOF-AM2 | NA |
|                   | 0                | 0                | 0      | 0      | 0                 | 0        | Unknown |    |
| Untested Somatic  | NA               | WXS              | none   | 0      | 0                 |          |         |    |
| Illumina_NextSeq  | NA               | NA               | 0      | NA     | 0                 | 0        | 0       | 0  |
|                   | 0                | 0                | 0      | 0      | 0                 | 0        | NA      | NA |
|                   | NA               | NA               | NA     | NA     | NA                | NA       | NA      | NA |
|                   | NA               | NA               | NA     | NA     | NA                | NA       | NA      | NA |
|                   | NA               | NA               | NA     | NA     | NA                | NA       | NA      | NA |
|                   | NA               | NA               | NA     | NA     | NA                | NA       | 0       | NA |
|                   | NA               | NA               | NA     | NA     | NA                | 0        | 0       | NA |
|                   | NA               | NA               | NA     | NA     | NA                | NA       | NA      | NA |
|                   | NA               | NA               | NA     | NA     | NA                | NA       | NA      | NA |
|                   | NA               | NA               | NA     | NA     | NA                | NA       | NA      | NA |
|                   | NA               | NA               | NA     | NA     | NA                | NA       | 0       | NA |
| Unknown           | NA               | Moffitt          | hs37d5 | 13     | 52249238          | 52249238 | +       | 0  |
|                   | SNP              | G                | G      | C      | novel             | none     | MOF-MA1 | NA |
|                   | 0                | 0                | 0      | 0      | 0                 | 0        | Unknown |    |
| Untested Somatic  | NA               | WXS              | none   | 0      | 0                 |          |         |    |
| Illumina_NextSeq  | NA               | NA               | 0      | NA     | 0                 | 0        | 0       | 0  |
|                   | 0                | 0                | 0      | 0      | 0                 | 0        | NA      | NA |
|                   | NA               | NA               | NA     | NA     | NA                | NA       | NA      | NA |
|                   | NA               | NA               | NA     | NA     | NA                | NA       | NA      | NA |
|                   | NA               | NA               | NA     | NA     | NA                | NA       | NA      | NA |
|                   | NA               | NA               | NA     | NA     | NA                | NA       | 0       | NA |
|                   | NA               | NA               | NA     | NA     | NA                | 0        | 0       | NA |
|                   | NA               | NA               | NA     | NA     | NA                | NA       | NA      | NA |
|                   | NA               | NA               | NA     | NA     | NA                | NA       | NA      | NA |
|                   | NA               | NA               | NA     | NA     | NA                | NA       | NA      | NA |
|                   | NA               | NA               | NA     | NA     | NA                | NA       | NA      | NA |
|                   | NA               | NA               | NA     | NA     | NA                | NA       | 0       | NA |
| NEK5              | NA               | Moffitt          | hs37d5 | 13     | 52701562          | 52701562 | +       |    |
| Nonsense_Mutation |                  |                  | SNP    | G      | G                 | C        | novel   |    |
| none              | MOF-MA1          | NA               | 0      | 0      | 0                 | 0        | 0       | 0  |
|                   | Unknown          | Untested Somatic | NA     | WXS    | none              | 0        | 0       | 0  |
|                   | Illumina_NextSeq | NA               | NA     | c.C57G | NA                | p.Y19X   |         |    |
| NM_199289         | exon3            | 0                | 0      | 0      | 0                 | 0        | 0       | 0  |
|                   | NA               | NA               | NA     | NA     | NA                | NA       | NA      | NA |
|                   | NA               | NA               | NA     | NA     | NA                | NA       | NA      | NA |
|                   | NA               | NA               | NA     | NA     | NA                | NA       | NA      | NA |
|                   | NA               | NA               | NA     | NA     | possibly_damaging |          |         | NA |
|                   | NA               | NA               | 0      | NA     | NA                | NA       | NA      | NA |



|                  |                  |          |         |      |           |          |           |    |
|------------------|------------------|----------|---------|------|-----------|----------|-----------|----|
| Unknown          | NA               | NA       | NA      | NA   | NA        | NA       | 0         |    |
|                  | NA               | Moffitt  | hs37d5  | 13   | 100861754 |          | 100861754 |    |
| +                | 0                | 0        | SNP     | C    | C         | G        | novel     |    |
| none             | MOF-MA1          | NA       | 0       | 0    | 0         | 0        | 0         | 0  |
|                  | Unknown          | Untested | Somatic | NA   | WXS       | none     | 0         | 0  |
|                  | Illumina_NextSeq | NA       | NA      | NA   | 0         | NA       | 0         | 0  |
|                  | 0                | 0        | 0       | 0    | 0         | 0        | 0         | NA |
|                  | NA               | NA       | NA      | NA   | NA        | NA       | NA        | NA |
|                  | NA               | NA       | NA      | NA   | NA        | NA       | NA        | NA |
|                  | NA               | NA       | NA      | NA   | NA        | NA       | NA        | NA |
|                  | NA               | NA       | NA      | NA   | NA        | NA       | NA        | 0  |
|                  | NA               | NA       | NA      | NA   | NA        | NA       | 0         | 0  |
|                  | NA               | NA       | NA      | NA   | NA        | NA       | NA        | NA |
|                  | NA               | NA       | NA      | NA   | NA        | NA       | NA        | NA |
|                  | NA               | NA       | NA      | NA   | NA        | NA       | NA        | NA |
|                  | NA               | NA       | NA      | NA   | NA        | NA       | NA        | 0  |
| Unknown          | NA               | Moffitt  | hs37d5  | 13   | 110434342 |          | 110434342 |    |
| +                | 0                | 0        | SNP     | C    | C         | G        | novel     |    |
| none             | MOF-MA1          | NA       | 0       | 0    | 0         | 0        | 0         | 0  |
|                  | Unknown          | Untested | Somatic | NA   | WXS       | none     | 0         | 0  |
|                  | Illumina_NextSeq | NA       | NA      | NA   | 0         | NA       | 0         | 0  |
|                  | 0                | 0        | 0       | 0    | 0         | 0        | 0         | NA |
|                  | NA               | NA       | NA      | NA   | NA        | NA       | NA        | NA |
|                  | NA               | NA       | NA      | NA   | NA        | NA       | NA        | NA |
|                  | NA               | NA       | NA      | NA   | NA        | NA       | NA        | NA |
|                  | NA               | NA       | NA      | NA   | NA        | NA       | NA        | 0  |
|                  | NA               | NA       | NA      | NA   | NA        | NA       | 0         | 0  |
|                  | NA               | NA       | NA      | NA   | NA        | NA       | NA        | NA |
|                  | NA               | NA       | NA      | NA   | NA        | NA       | NA        | NA |
|                  | NA               | NA       | NA      | NA   | NA        | NA       | NA        | NA |
|                  | NA               | NA       | NA      | NA   | NA        | NA       | NA        | 0  |
| Unknown          | NA               | Moffitt  | hs37d5  | 13   | 111158707 |          | 111158707 |    |
| +                | 0                | 0        | SNP     | T    | T         | C        | novel     |    |
| none             | MOF-MA1          | NA       | 0       | 0    | 0         | 0        | 0         | 0  |
|                  | Unknown          | Untested | Somatic | NA   | WXS       | none     | 0         | 0  |
|                  | Illumina_NextSeq | NA       | NA      | NA   | 0         | NA       | 0         | 0  |
|                  | 0                | 0        | 0       | 0    | 0         | 0        | 0         | NA |
|                  | NA               | NA       | NA      | NA   | NA        | NA       | NA        | NA |
|                  | NA               | NA       | NA      | NA   | NA        | NA       | NA        | NA |
|                  | NA               | NA       | NA      | NA   | NA        | NA       | NA        | NA |
|                  | NA               | NA       | NA      | NA   | NA        | NA       | NA        | 0  |
|                  | NA               | NA       | NA      | NA   | NA        | NA       | 0         | 0  |
|                  | NA               | NA       | NA      | NA   | NA        | NA       | NA        | NA |
|                  | NA               | NA       | NA      | NA   | NA        | NA       | NA        | NA |
|                  | NA               | NA       | NA      | NA   | NA        | NA       | NA        | NA |
|                  | NA               | NA       | NA      | NA   | NA        | NA       | NA        | 0  |
| TEP1             | NA               | Moffitt  | hs37d5  | 14   | 20842654  | 20842654 | +         |    |
| Silent           | SNP              | T        | T       | G    | novel     | none     | MOF-AM2   | NA |
|                  | 0                | 0        | 0       | 0    | 0         | 0        | Unknown   |    |
| Untested Somatic | NA               | NA       | WXS     | none | 0         | 0        |           |    |





|                   |                  |                  |        |    |          |            |         |    |
|-------------------|------------------|------------------|--------|----|----------|------------|---------|----|
|                   | NA               | NA               | NA     | NA | NA       | NA         | NA      | NA |
|                   | NA               | NA               | 0      |    |          |            |         |    |
| Unknown           | NA               | Moffitt          | hs37d5 | 14 | 65269127 | 65269127 + |         | 0  |
|                   | SNP              | C                | C      | T  | novel    | none       | MOF-AM2 | NA |
|                   | 0                | 0                | 0      | 0  | 0        | 0          | Unknown |    |
| Untested Somatic  | NA               | WXS              | none   |    | 0        | 0          |         |    |
| Illumina_NextSeq  | NA               | NA               | 0      |    | NA       | 0          | 0       | 0  |
|                   | 0                | 0                | 0      | 0  | 0        | 0          | NA      | NA |
|                   | NA               | NA               | NA     | NA | NA       | NA         | NA      | NA |
|                   | NA               | NA               | NA     | NA | NA       | NA         | NA      | NA |
|                   | NA               | NA               | NA     | NA | NA       | NA         | NA      | NA |
|                   | NA               | NA               | NA     | NA | NA       | NA         | 0       | NA |
|                   | NA               | NA               | NA     | NA | NA       | 0          | 0       | NA |
|                   | NA               | NA               | NA     | NA | NA       | NA         | NA      | NA |
|                   | NA               | NA               | NA     | NA | NA       | NA         | NA      | NA |
|                   | NA               | NA               | NA     | NA | NA       | NA         | NA      | NA |
|                   | NA               | NA               | NA     | NA | NA       | NA         | 0       | NA |
| Unknown           | NA               | Moffitt          | hs37d5 | 14 | 70459257 | 70459257 + |         | 0  |
|                   | SNP              | C                | C      | T  | novel    | none       | MOF-AM2 | NA |
|                   | 0                | 0                | 0      | 0  | 0        | 0          | Unknown |    |
| Untested Somatic  | NA               | WXS              | none   |    | 0        | 0          |         |    |
| Illumina_NextSeq  | NA               | NA               | 0      |    | NA       | 0          | 0       | 0  |
|                   | 0                | 0                | 0      | 0  | 0        | 0          | NA      | NA |
|                   | NA               | NA               | NA     | NA | NA       | NA         | NA      | NA |
|                   | NA               | NA               | NA     | NA | NA       | NA         | NA      | NA |
|                   | NA               | NA               | NA     | NA | NA       | NA         | NA      | NA |
|                   | NA               | NA               | NA     | NA | NA       | NA         | 0       | NA |
|                   | NA               | NA               | NA     | NA | NA       | 0          | 0       | NA |
|                   | NA               | NA               | NA     | NA | NA       | NA         | NA      | NA |
|                   | NA               | NA               | NA     | NA | NA       | NA         | NA      | NA |
|                   | NA               | NA               | NA     | NA | NA       | NA         | NA      | NA |
|                   | NA               | NA               | NA     | NA | NA       | NA         | NA      | NA |
|                   | NA               | NA               | NA     | NA | NA       | NA         | 0       | NA |
| COX16             | NA               | Moffitt          | hs37d5 | 14 | 70793059 | 70793059 + |         |    |
| Missense_Mutation |                  | SNP              | C      | C  | C        | G          | novel   |    |
| none              | MOF-MA1          | NA               | 0      | 0  | 0        | 0          | 0       | 0  |
|                   | Unknown          | Untested Somatic | NA     |    | WXS      | none       | 0       | 0  |
|                   | Illumina_NextSeq | NA               | NA     |    | c.G312C  | NA         | p.K104N |    |
| NM_016468         | exon4            | 0                | 0      |    | 0        | 0          | 0       | 0  |
|                   | NA               | NA               | NA     | NA | NA       | NA         | NA      | NA |
|                   | NA               | NA               | NA     | NA | NA       | NA         | NA      | NA |
|                   | NA               | NA               | NA     | NA | NA       | NA         | NA      | NA |
|                   | NA               | NA               | NA     | NA | benign   | NA         | NA      | NA |
|                   | 0                | NA               | NA     | NA | NA       | NA         | NA      | 0  |
|                   | 0                | NA               | NA     | NA | NA       | NA         | NA      | NA |
|                   | NA               | NA               | NA     | NA | NA       | NA         | NA      | NA |
|                   | NA               | NA               | NA     | NA | NA       | NA         | NA      | NA |
|                   | NA               | NA               | NA     | NA | NA       | NA         | NA      | NA |
|                   | 0                |                  |        |    |          |            |         |    |
| Unknown           | NA               | Moffitt          | hs37d5 | 14 | 74442751 | 74442751 + |         | 0  |
|                   | SNP              | G                | G      | A  | novel    | none       | MOF-MA1 | NA |









|                   |                  |                   |                  |          |           |          |           |    |
|-------------------|------------------|-------------------|------------------|----------|-----------|----------|-----------|----|
|                   | NA               | NA                | NA               | NA       | NA        | NA       | NA        | 0  |
| TECPR2            | NA               | Moffitt           | hs37d5           | 14       | 102963958 |          | 102963958 |    |
|                   | +                | Missense_Mutation |                  |          | SNP       | G        | G         | A  |
|                   | novel            | none              | MOF-AM6          | NA       | 0         | 0        | 0         | 0  |
|                   | 0                | 0                 | Unknown          | Untested | Somatic   | NA       | WXS       |    |
| none              | 0                | 0                 | Illumina_NextSeq | NA       | NA        | NA       | c.G3983A  | NA |
|                   | p.C1328Y         | NM_014844         |                  | exon19   | 0         | 0        | 0         | 0  |
|                   | 0                | 0                 | NA               | NA       | NA        | NA       | NA        | NA |
|                   | NA               | NA                | NA               | NA       | NA        | NA       | NA        | NA |
|                   | NA               | NA                | NA               | NA       | NA        | NA       | NA        | NA |
|                   | NA               | NA                | NA               | NA       | NA        | NA       | NA        | NA |
| probably_damaging |                  |                   | NA               | NA       | NA        | 0        | NA        | NA |
|                   | NA               | NA                | NA               | NA       | 0         | 0        | NA        | NA |
|                   | NA               | NA                | NA               | NA       | NA        | NA       | NA        | NA |
|                   | NA               | NA                | NA               | NA       | NA        | NA       | NA        | NA |
|                   | NA               | NA                | NA               | NA       | NA        | NA       | NA        | NA |
|                   | NA               | NA                | NA               | NA       | NA        | 0        |           |    |
| Unknown           | NA               | Moffitt           | hs37d5           | 14       | 104492995 |          | 104492995 |    |
|                   | +                | 0                 | SNP              | T        | T         | G        | novel     |    |
| none              | MOF-AM2          | NA                | 0                | 0        | 0         | 0        | 0         | 0  |
|                   | Unknown          | Untested          | Somatic          | NA       | WXS       | none     | 0         | 0  |
|                   | Illumina_NextSeq | NA                | NA               | NA       | 0         | NA       | 0         | 0  |
|                   | 0                | 0                 | 0                | 0        | 0         | 0        | 0         | NA |
|                   | NA               | NA                | NA               | NA       | NA        | NA       | NA        | NA |
|                   | NA               | NA                | NA               | NA       | NA        | NA       | NA        | NA |
|                   | NA               | NA                | NA               | NA       | NA        | NA       | NA        | NA |
|                   | NA               | NA                | NA               | NA       | NA        | NA       | NA        | 0  |
|                   | NA               | NA                | NA               | NA       | NA        | NA       | 0         | 0  |
|                   | NA               | NA                | NA               | NA       | NA        | NA       | NA        | NA |
|                   | NA               | NA                | NA               | NA       | NA        | NA       | NA        | NA |
|                   | NA               | NA                | NA               | NA       | NA        | NA       | NA        | NA |
|                   | NA               | NA                | NA               | NA       | NA        | NA       | NA        | NA |
|                   | NA               | NA                | NA               | NA       | NA        | NA       | NA        | 0  |
| Unknown           | NA               | Moffitt           | hs37d5           | 14       | 106208265 |          | 106208265 |    |
|                   | +                | 0                 | SNP              | G        | G         | T        | novel     |    |
| none              | MOF-AM5          | NA                | 0                | 0        | 0         | 0        | 0         | 0  |
|                   | Unknown          | Untested          | Somatic          | NA       | WXS       | none     | 0         | 0  |
|                   | Illumina_NextSeq | NA                | NA               | NA       | 0         | NA       | 0         | 0  |
|                   | 0                | 0                 | 0                | 0        | 0         | 0        | 0         | NA |
|                   | NA               | NA                | NA               | NA       | NA        | NA       | NA        | NA |
|                   | NA               | NA                | NA               | NA       | NA        | NA       | NA        | NA |
|                   | NA               | NA                | NA               | NA       | NA        | NA       | NA        | NA |
|                   | NA               | NA                | NA               | NA       | NA        | NA       | NA        | 0  |
|                   | NA               | NA                | NA               | NA       | NA        | NA       | 0         | 0  |
|                   | NA               | NA                | NA               | NA       | NA        | NA       | NA        | NA |
|                   | NA               | NA                | NA               | NA       | NA        | NA       | NA        | NA |
|                   | NA               | NA                | NA               | NA       | NA        | NA       | NA        | NA |
|                   | NA               | NA                | NA               | NA       | NA        | NA       | NA        | 0  |
| MTMR10            | NA               | Moffitt           | hs37d5           | 15       | 31269030  | 31269030 | +         |    |
| Missense_Mutation |                  |                   | SNP              | G        | G         | C        | novel     |    |
| none              | MOF-MA1          | NA                | 0                | 0        | 0         | 0        | 0         | 0  |

|                   |                  |          |         |    |                   |          |         |    |
|-------------------|------------------|----------|---------|----|-------------------|----------|---------|----|
|                   | Unknown          | Untested | Somatic | NA | WXS               | none     | 0       | 0  |
|                   | Illumina_NextSeq |          | NA      | NA | c.C250G           | NA       | p.P84A  |    |
| NM_017762         | exon3            | 0        | 0       | 0  | 0                 | 0        | 0       | 0  |
|                   | NA               | NA       | NA      | NA | NA                | NA       | NA      | NA |
|                   | NA               | NA       | NA      | NA | NA                | NA       | NA      | NA |
|                   | NA               | NA       | NA      | NA | NA                | NA       | NA      | NA |
|                   | NA               | NA       | NA      | NA | NA                | NA       | NA      | NA |
|                   | 0                | NA       | NA      | NA | NA                | NA       | NA      | 0  |
|                   | 0                | NA       | NA      | NA | NA                | NA       | NA      | NA |
|                   | NA               | NA       | NA      | NA | NA                | NA       | NA      | NA |
|                   | NA               | NA       | NA      | NA | NA                | NA       | NA      | NA |
|                   | NA               | NA       | NA      | NA | NA                | NA       | NA      | NA |
|                   | 0                |          |         |    |                   |          |         |    |
| SPRED1            | NA               | Moffitt  | hs37d5  | 15 | 38591723          | 38591723 | +       |    |
| Missense_Mutation |                  |          | SNP     | G  | G                 | C        | novel   |    |
| none              | MOF-AM2          | NA       | 0       | 0  | 0                 | 0        | 0       | 0  |
|                   | Unknown          | Untested | Somatic | NA | WXS               | none     | 0       | 0  |
|                   | Illumina_NextSeq |          | NA      | NA | c.G182C           | NA       | p.R61P  |    |
| NM_152594         | exon2            | 0        | 0       | 0  | 0                 | 0        | 0       | 0  |
|                   | NA               | NA       | NA      | NA | NA                | NA       | NA      | NA |
|                   | NA               | NA       | NA      | NA | NA                | NA       | NA      | NA |
|                   | NA               | NA       | NA      | NA | NA                | NA       | NA      | NA |
|                   | NA               | NA       | NA      | NA | probably_damaging |          |         | NA |
|                   | NA               | 0        | 0       | NA | NA                | NA       | NA      | NA |
|                   | NA               | 0        | 0       | NA | NA                | NA       | NA      | NA |
|                   | NA               | NA       | NA      | NA | NA                | NA       | NA      | NA |
|                   | NA               | NA       | NA      | NA | NA                | NA       | NA      | NA |
|                   | NA               | NA       | NA      | NA | NA                | NA       | NA      | NA |
|                   | NA               | NA       | 0       | NA | NA                | NA       | NA      | NA |
| Unknown           | NA               | Moffitt  | hs37d5  | 15 | 40645364          | 40645364 | +       | 0  |
|                   | SNP              | C        | C       | T  | novel             | none     | MOF-MA1 | NA |
|                   | 0                | 0        | 0       | 0  | 0                 | 0        | Unknown |    |
| Untested Somatic  | NA               | WXS      | none    | 0  | 0                 | 0        |         |    |
| Illumina_NextSeq  | NA               | NA       | 0       | NA | 0                 | 0        | 0       | 0  |
|                   | 0                | 0        | 0       | 0  | 0                 | 0        | NA      | NA |
|                   | NA               | NA       | NA      | NA | NA                | NA       | NA      | NA |
|                   | NA               | NA       | NA      | NA | NA                | NA       | NA      | NA |
|                   | NA               | NA       | NA      | NA | NA                | NA       | NA      | NA |
|                   | NA               | NA       | NA      | NA | NA                | NA       | 0       | NA |
|                   | NA               | NA       | NA      | NA | NA                | 0        | 0       | NA |
|                   | NA               | NA       | NA      | NA | NA                | NA       | NA      | NA |
|                   | NA               | NA       | NA      | NA | NA                | NA       | NA      | NA |
|                   | NA               | NA       | NA      | NA | NA                | NA       | NA      | NA |
|                   | NA               | NA       | NA      | NA | NA                | NA       | 0       |    |
| DISP2             | NA               | Moffitt  | hs37d5  | 15 | 40660788          | 40660788 | +       |    |
| Missense_Mutation |                  |          | SNP     | C  | C                 | G        | novel   |    |
| none              | MOF-MA1          | NA       | 0       | 0  | 0                 | 0        | 0       | 0  |
|                   | Unknown          | Untested | Somatic | NA | WXS               | none     | 0       | 0  |
|                   | Illumina_NextSeq |          | NA      | NA | c.C2475G          | NA       | p.F825L |    |
| NM_033510         | exon8            | 0        | 0       | 0  | 0                 | 0        | 0       | 0  |





|                   |                  |         |        |                   |            |            |         |    |
|-------------------|------------------|---------|--------|-------------------|------------|------------|---------|----|
| Unknown           | NA               | NA      | 0      |                   |            |            |         |    |
| NA                | Moffitt          | hs37d5  | 15     | 57484587          | 57484587 + |            | 0       |    |
| SNP               | C                | C       | T      | novel             | none       | MOF-AM6    | NA      |    |
| 0                 | 0                | 0       | 0      | 0                 | 0          | Unknown    |         |    |
| Untested Somatic  | NA               | WXS     | none   | 0                 | 0          |            |         |    |
| Illumina_NextSeq  | NA               | NA      | 0      | NA                | 0          | 0          | 0       | 0  |
| 0                 | 0                | 0       | 0      | 0                 | 0          | NA         | NA      | NA |
| NA                | NA               | NA      | NA     | NA                | NA         | NA         | NA      | NA |
| NA                | NA               | NA      | NA     | NA                | NA         | NA         | NA      | NA |
| NA                | NA               | NA      | NA     | NA                | NA         | NA         | NA      | NA |
| NA                | NA               | NA      | NA     | NA                | NA         | 0          | NA      | NA |
| NA                | NA               | NA      | NA     | NA                | NA         | 0          | 0       | NA |
| NA                | NA               | NA      | NA     | NA                | NA         | NA         | NA      | NA |
| NA                | NA               | NA      | NA     | NA                | NA         | NA         | NA      | NA |
| NA                | NA               | NA      | NA     | NA                | NA         | NA         | NA      | NA |
| NA                | NA               | NA      | NA     | NA                | NA         | 0          |         |    |
| TCF12             | NA               | Moffitt | hs37d5 | 15                | 57524979   | 57524979 + |         |    |
| Missense_Mutation |                  | SNP     | C      | C                 | T          | novel      |         |    |
| none              | MOF-AM2          | NA      | 0      | 0                 | 0          | 0          | 0       | 0  |
| Unknown           | Untested Somatic | NA      | NA     | WXS               | none       | 0          | 0       |    |
| Illumina_NextSeq  | NA               | NA      | NA     | c.C895T           | NA         | p.R299C    |         |    |
| NM_207037         | exon11           | 0       | 0      | 0                 | 0          | 0          | 0       | 0  |
| NA                | NA               | NA      | NA     | NA                | NA         | NA         | NA      | NA |
| NA                | NA               | NA      | NA     | NA                | NA         | NA         | NA      | NA |
| NA                | NA               | NA      | NA     | NA                | NA         | NA         | NA      | NA |
| NA                | NA               | NA      | NA     | probably_damaging |            |            |         | NA |
| NA                | NA               | 0       | NA     | NA                | NA         | NA         | NA      | NA |
| NA                | 0                | 0       | NA     | NA                | NA         | NA         | NA      | NA |
| NA                | NA               | NA      | NA     | NA                | NA         | NA         | NA      | NA |
| NA                | NA               | NA      | NA     | NA                | NA         | NA         | NA      | NA |
| NA                | NA               | NA      | NA     | NA                | NA         | NA         | NA      | NA |
| NA                | NA               | NA      | NA     | NA                | NA         | NA         | NA      | NA |
| NA                | NA               | 1       |        |                   |            |            |         |    |
| Unknown           | NA               | Moffitt | hs37d5 | 15                | 59455573   | 59455576 + |         | 0  |
| DEL               | TCCA             | TCCA    | T      | novel             | none       | MOF-AM2    | NA      |    |
| 0                 | 0                | 0       | 0      | 0                 | 0          | Unknown    |         |    |
| Untested Somatic  | NA               | WXS     | none   | 0                 | 0          |            |         |    |
| Illumina_NextSeq  | NA               | NA      | 0      | NA                | 0          | 0          | 0       | 0  |
| 0                 | 0                | 0       | 0      | 0                 | 0          | NA         | NA      | NA |
| NA                | NA               | NA      | NA     | NA                | NA         | NA         | NA      | NA |
| NA                | NA               | NA      | NA     | NA                | NA         | NA         | NA      | NA |
| NA                | NA               | NA      | NA     | NA                | NA         | NA         | NA      | NA |
| NA                | NA               | NA      | NA     | NA                | NA         | 0          | NA      | NA |
| NA                | NA               | NA      | NA     | NA                | NA         | 0          | 0       | NA |
| NA                | NA               | NA      | NA     | NA                | NA         | NA         | NA      | NA |
| NA                | NA               | NA      | NA     | NA                | NA         | NA         | NA      | NA |
| NA                | NA               | NA      | NA     | NA                | NA         | NA         | NA      | NA |
| NA                | NA               | NA      | NA     | NA                | NA         | 0          |         |    |
| CILP              | NA               | Moffitt | hs37d5 | 15                | 65489279   | 65489279 + |         |    |
| Silent            | SNP              | G       | G      | T                 | novel      | none       | MOF-MA1 | NA |
| 0                 | 0                | 0       | 0      | 0                 | 0          | Unknown    |         |    |







|                   |                  |                  |        |          |                   |            |         |    |
|-------------------|------------------|------------------|--------|----------|-------------------|------------|---------|----|
|                   | NA               | NA               | NA     | NA       | NA                | NA         | NA      | NA |
|                   | NA               | NA               | NA     | NA       | NA                | NA         | NA      | NA |
|                   | NA               | NA               | NA     | NA       | NA                | NA         | 0       |    |
| Unknown           | NA               | Moffitt          | hs37d5 | 15       | 94882691          | 94882691 + |         | 0  |
|                   | SNP              | C                | C      | A        | novel             | none       | MOF-AM2 | NA |
|                   | 0                | 0                | 0      | 0        | 0                 | 0          | Unknown |    |
| Untested Somatic  | NA               | WXS              | none   |          | 0                 | 0          |         |    |
| Illumina_NextSeq  | NA               | NA               | 0      | NA       | 0                 | 0          | 0       | 0  |
|                   | 0                | 0                | 0      | 0        | 0                 | 0          | NA      | NA |
|                   | NA               | NA               | NA     | NA       | NA                | NA         | NA      | NA |
|                   | NA               | NA               | NA     | NA       | NA                | NA         | NA      | NA |
|                   | NA               | NA               | NA     | NA       | NA                | NA         | NA      | NA |
|                   | NA               | NA               | NA     | NA       | NA                | NA         | NA      | NA |
|                   | NA               | NA               | NA     | NA       | NA                | NA         | 0       | NA |
|                   | NA               | NA               | NA     | NA       | NA                | 0          | 0       | NA |
|                   | NA               | NA               | NA     | NA       | NA                | NA         | NA      | NA |
|                   | NA               | NA               | NA     | NA       | NA                | NA         | NA      | NA |
|                   | NA               | NA               | NA     | NA       | NA                | NA         | NA      | NA |
|                   | NA               | NA               | NA     | NA       | NA                | NA         | 0       | NA |
| Unknown           | NA               | Moffitt          | hs37d5 | 15       | 99192749          | 99192749 + |         | 0  |
|                   | SNP              | C                | C      | T        | novel             | none       | MOF-AM2 | NA |
|                   | 0                | 0                | 0      | 0        | 0                 | 0          | Unknown |    |
| Untested Somatic  | NA               | WXS              | none   |          | 0                 | 0          |         |    |
| Illumina_NextSeq  | NA               | NA               | 0      | NA       | 0                 | 0          | 0       | 0  |
|                   | 0                | 0                | 0      | 0        | 0                 | 0          | NA      | NA |
|                   | NA               | NA               | NA     | NA       | NA                | NA         | NA      | NA |
|                   | NA               | NA               | NA     | NA       | NA                | NA         | NA      | NA |
|                   | NA               | NA               | NA     | NA       | NA                | NA         | NA      | NA |
|                   | NA               | NA               | NA     | NA       | NA                | NA         | NA      | NA |
|                   | NA               | NA               | NA     | NA       | NA                | NA         | 0       | NA |
|                   | NA               | NA               | NA     | NA       | NA                | 0          | 0       | NA |
|                   | NA               | NA               | NA     | NA       | NA                | NA         | NA      | NA |
|                   | NA               | NA               | NA     | NA       | NA                | NA         | NA      | NA |
|                   | NA               | NA               | NA     | NA       | NA                | NA         | NA      | NA |
|                   | NA               | NA               | NA     | NA       | NA                | NA         | NA      | NA |
|                   | NA               | NA               | NA     | NA       | NA                | NA         | 0       |    |
| IGF1R             | NA               | Moffitt          | hs37d5 | 15       | 99456470          | 99456470 + |         |    |
| Missense_Mutation |                  | SNP              | G      | G        | T                 | novel      |         |    |
| none              | MOF-MA1          | NA               | 0      | 0        | 0                 | 0          | 0       | 0  |
|                   | Unknown          | Untested Somatic | NA     | WXS      | none              | 0          | 0       |    |
|                   | Illumina_NextSeq | NA               | NA     | c.G1787T | NA                | p.G596V    |         |    |
| NM_000875         | exon8            | 0                | 0      | 0        | 0                 | 0          | 0       | 0  |
|                   | NA               | NA               | NA     | NA       | NA                | NA         | NA      | NA |
|                   | NA               | NA               | NA     | NA       | NA                | NA         | NA      | NA |
|                   | NA               | NA               | NA     | NA       | NA                | NA         | NA      | NA |
|                   | NA               | NA               | NA     | NA       | probably_damaging |            |         | NA |
|                   | NA               | NA               | 0      | NA       | NA                | NA         | NA      | NA |
|                   | NA               | 0                | 0      | NA       | NA                | NA         | NA      | NA |
|                   | NA               | NA               | NA     | NA       | NA                | NA         | NA      | NA |
|                   | NA               | NA               | NA     | NA       | NA                | NA         | NA      | NA |
|                   | NA               | NA               | NA     | NA       | NA                | NA         | NA      | NA |
|                   | NA               | NA               | 0      |          |                   |            |         |    |
| ADAMTS17          | NA               | Moffitt          | hs37d5 | 15       | 100649284         | 100649284  |         |    |

|                 |                  |          |         |               |          |          |           |    |
|-----------------|------------------|----------|---------|---------------|----------|----------|-----------|----|
| none            | +                | Silent   | SNP     | C             | C        | T        | novel     |    |
|                 | MOF-MA1          | NA       | 0       | 0             | 0        | 0        | 0         | 0  |
|                 | Unknown          | Untested | Somatic | NA            | WXS      | none     | 0         | 0  |
|                 | Illumina_NextSeq | NA       | NA      | NA            | c.G1926A | NA       | p.K642K   |    |
| NM_139057       | exon14           | 0        | 0       | 0             | 0        | 0        | 0         | 0  |
|                 | NA               | NA       | NA      | NA            | NA       | NA       | NA        | NA |
|                 | NA               | NA       | NA      | NA            | NA       | NA       | NA        | NA |
|                 | NA               | NA       | NA      | NA            | NA       | NA       | NA        | NA |
|                 | NA               | NA       | NA      | NA            | NA       | NA       | NA        | NA |
|                 | 0.0005           | NA       | NA      | NA            | NA       | NA       | NA        | 0  |
|                 | 0                | NA       | NA      | NA            | NA       | NA       | NA        | NA |
|                 | NA               | NA       | NA      | NA            | NA       | NA       | NA        | NA |
|                 | NA               | NA       | NA      | NA            | NA       | NA       | NA        | NA |
|                 | NA               | NA       | NA      | NA            | NA       | NA       | NA        | NA |
|                 | 0                |          |         |               |          |          |           |    |
| Unknown         | NA               | Moffitt  | hs37d5  | 16            | 321157   | 321157   | +         | 0  |
|                 | SNP              | G        | G       | A             | novel    | none     | MOF-MA1   | NA |
|                 | 0                | 0        | 0       | 0             | 0        | 0        | Unknown   |    |
|                 | Untested         | Somatic  | NA      | WXS           | none     | 0        | 0         |    |
|                 | Illumina_NextSeq | NA       | NA      | 0             | NA       | 0        | 0         | 0  |
|                 | 0                | 0        | 0       | 0             | 0        | 0        | NA        | NA |
|                 | NA               | NA       | NA      | NA            | NA       | NA       | NA        | NA |
|                 | NA               | NA       | NA      | NA            | NA       | NA       | NA        | NA |
|                 | NA               | NA       | NA      | NA            | NA       | NA       | NA        | NA |
|                 | NA               | NA       | NA      | NA            | NA       | NA       | 0         | NA |
|                 | NA               | NA       | NA      | NA            | NA       | 0        | 0         | NA |
|                 | NA               | NA       | NA      | NA            | NA       | NA       | NA        | NA |
|                 | NA               | NA       | NA      | NA            | NA       | NA       | NA        | NA |
|                 | NA               | NA       | NA      | NA            | NA       | NA       | NA        | NA |
|                 | NA               | NA       | NA      | NA            | NA       | NA       | NA        | NA |
|                 | NA               | NA       | NA      | NA            | NA       | NA       | 0         |    |
| WDR90           | NA               | Moffitt  | hs37d5  | 16            | 705058   | 705058   | +         |    |
| Silent          | SNP              | G        | G       | T             | novel    | none     | MOF-AM5   | NA |
|                 | 0                | 0        | 0       | 0             | 0        | 0        | Unknown   |    |
|                 | Untested         | Somatic  | NA      | WXS           | none     | 0        | 0         |    |
|                 | Illumina_NextSeq | NA       | NA      | c.G1467T      | NA       | p.V489V  | NM_145294 |    |
|                 | exon14           | 0        | 0       | 0             | 0        | 0        | 0         | NA |
|                 | NA               | NA       | NA      | NA            | NA       | NA       | NA        | NA |
|                 | NA               | NA       | NA      | NA            | NA       | NA       | NA        | NA |
|                 | NA               | NA       | NA      | NA            | NA       | NA       | NA        | NA |
|                 | NA               | NA       | NA      | NA            | NA       | NA       | NA        | 0  |
|                 | NA               | NA       | NA      | NA            | NA       | NA       | 0         | 0  |
|                 | NA               | NA       | NA      | NA            | NA       | NA       | NA        | NA |
|                 | NA               | NA       | NA      | NA            | NA       | NA       | NA        | NA |
|                 | NA               | NA       | NA      | NA            | NA       | NA       | NA        | NA |
|                 | NA               | NA       | NA      | NA            | NA       | NA       | NA        | 0  |
| HAGHL           | NA               | Moffitt  | hs37d5  | 16            | 778592   | 778592   | +         |    |
| Frame_Shift_Ins | INS              | G        | G       | G             | GC       | novel    | none      |    |
| MOF-MA1         | NA               | 0        | 0       | 0             | 0        | 0        | 0         |    |
|                 | Unknown          | Untested | Somatic | NA            | WXS      | none     | 0         | 0  |
|                 | Illumina_NextSeq | NA       | NA      | c.486_487insC | NA       | p.L162fs |           |    |





|                  |     |         |        |    |          |          |         |    |
|------------------|-----|---------|--------|----|----------|----------|---------|----|
|                  | NA  | NA      | NA     | NA | NA       | NA       | NA      | NA |
|                  | NA  | NA      | NA     | NA | NA       | NA       | NA      | NA |
|                  | NA  | NA      | NA     | NA | NA       | NA       | 0       |    |
| Unknown          | NA  | Moffitt | hs37d5 | 16 | 18858707 | 18858707 | +       | 0  |
|                  | SNP | T       | T      | C  | novel    | none     | MOF-AM2 | NA |
|                  | 0   | 0       | 0      | 0  | 0        | 0        | Unknown |    |
| Untested Somatic | NA  | WXS     | none   | 0  | 0        | 0        |         |    |
| Illumina_NextSeq | NA  | NA      | 0      | NA | 0        | 0        | 0       | 0  |
|                  | 0   | 0       | 0      | 0  | 0        | 0        | NA      | NA |
|                  | NA  | NA      | NA     | NA | NA       | NA       | NA      | NA |
|                  | NA  | NA      | NA     | NA | NA       | NA       | NA      | NA |
|                  | NA  | NA      | NA     | NA | NA       | NA       | NA      | NA |
|                  | NA  | NA      | NA     | NA | NA       | NA       | 0       | NA |
|                  | NA  | NA      | NA     | NA | NA       | 0        | 0       | NA |
|                  | NA  | NA      | NA     | NA | NA       | NA       | NA      | NA |
|                  | NA  | NA      | NA     | NA | NA       | NA       | NA      | NA |
|                  | NA  | NA      | NA     | NA | NA       | NA       | NA      | NA |
|                  | NA  | NA      | NA     | NA | NA       | NA       | 0       | NA |
| Unknown          | NA  | Moffitt | hs37d5 | 16 | 19068095 | 19068095 | +       | 0  |
|                  | SNP | T       | T      | G  | novel    | none     | MOF-MA1 | NA |
|                  | 0   | 0       | 0      | 0  | 0        | 0        | Unknown |    |
| Untested Somatic | NA  | WXS     | none   | 0  | 0        | 0        |         |    |
| Illumina_NextSeq | NA  | NA      | 0      | NA | 0        | 0        | 0       | 0  |
|                  | 0   | 0       | 0      | 0  | 0        | 0        | NA      | NA |
|                  | NA  | NA      | NA     | NA | NA       | NA       | NA      | NA |
|                  | NA  | NA      | NA     | NA | NA       | NA       | NA      | NA |
|                  | NA  | NA      | NA     | NA | NA       | NA       | NA      | NA |
|                  | NA  | NA      | NA     | NA | NA       | NA       | 0       | NA |
|                  | NA  | NA      | NA     | NA | NA       | 0        | 0       | NA |
|                  | NA  | NA      | NA     | NA | NA       | NA       | NA      | NA |
|                  | NA  | NA      | NA     | NA | NA       | NA       | NA      | NA |
|                  | NA  | NA      | NA     | NA | NA       | NA       | NA      | NA |
|                  | NA  | NA      | NA     | NA | NA       | NA       | 0       | NA |
| Unknown          | NA  | Moffitt | hs37d5 | 16 | 20599444 | 20599444 | +       | 0  |
|                  | SNP | C       | C      | A  | novel    | none     | MOF-AM6 | NA |
|                  | 0   | 0       | 0      | 0  | 0        | 0        | Unknown |    |
| Untested Somatic | NA  | WXS     | none   | 0  | 0        | 0        |         |    |
| Illumina_NextSeq | NA  | NA      | 0      | NA | 0        | 0        | 0       | 0  |
|                  | 0   | 0       | 0      | 0  | 0        | 0        | NA      | NA |
|                  | NA  | NA      | NA     | NA | NA       | NA       | NA      | NA |
|                  | NA  | NA      | NA     | NA | NA       | NA       | NA      | NA |
|                  | NA  | NA      | NA     | NA | NA       | NA       | NA      | NA |
|                  | NA  | NA      | NA     | NA | NA       | NA       | 0       | NA |
|                  | NA  | NA      | NA     | NA | NA       | 0        | 0       | NA |
|                  | NA  | NA      | NA     | NA | NA       | NA       | NA      | NA |
|                  | NA  | NA      | NA     | NA | NA       | NA       | NA      | NA |
|                  | NA  | NA      | NA     | NA | NA       | NA       | NA      | NA |
|                  | NA  | NA      | NA     | NA | NA       | NA       | 0       | NA |
| Unknown          | NA  | Moffitt | hs37d5 | 16 | 21531555 | 21531555 | +       | 0  |
|                  | SNP | C       | C      | G  | novel    | none     | MOF-MA1 | NA |





|                   |                  |                  |        |        |                   |            |          |    |
|-------------------|------------------|------------------|--------|--------|-------------------|------------|----------|----|
|                   | NA               | NA               | NA     | NA     | NA                | NA         | NA       | NA |
|                   | NA               | NA               | NA     | NA     | NA                | NA         | NA       | NA |
|                   | NA               | NA               | NA     | NA     | NA                | NA         | NA       | NA |
|                   | NA               | NA               | NA     | NA     | NA                | NA         | 0        | NA |
|                   | NA               | NA               | NA     | NA     | NA                | 0          | 0        | NA |
|                   | NA               | NA               | NA     | NA     | NA                | NA         | NA       | NA |
|                   | NA               | NA               | NA     | NA     | NA                | NA         | NA       | NA |
|                   | NA               | NA               | NA     | NA     | NA                | NA         | NA       | NA |
|                   | NA               | NA               | NA     | NA     | NA                | NA         | 0        | NA |
| Unknown           | NA               | Moffitt          | hs37d5 | 16     | 30389585          | 30389585 + |          | 0  |
|                   | SNP              | G                | G      | C      | novel             | none       | MOF-MA1  | NA |
|                   | 0                | 0                | 0      | 0      | 0                 | 0          | Unknown  |    |
| Untested Somatic  | NA               | WXS              | none   | 0      | 0                 |            |          |    |
| Illumina_NextSeq  | NA               | NA               | 0      | NA     | 0                 | 0          | 0        | 0  |
|                   | 0                | 0                | 0      | 0      | 0                 | 0          | NA       | NA |
|                   | NA               | NA               | NA     | NA     | NA                | NA         | NA       | NA |
|                   | NA               | NA               | NA     | NA     | NA                | NA         | NA       | NA |
|                   | NA               | NA               | NA     | NA     | NA                | NA         | NA       | NA |
|                   | NA               | NA               | NA     | NA     | NA                | NA         | 0        | NA |
|                   | NA               | NA               | NA     | NA     | NA                | 0          | 0        | NA |
|                   | NA               | NA               | NA     | NA     | NA                | NA         | NA       | NA |
|                   | NA               | NA               | NA     | NA     | NA                | NA         | NA       | NA |
|                   | NA               | NA               | NA     | NA     | NA                | NA         | NA       | NA |
|                   | NA               | NA               | NA     | NA     | NA                | NA         | 0        | NA |
| Unknown           | NA               | Moffitt          | hs37d5 | 16     | 30484145          | 30484145 + |          | 0  |
|                   | SNP              | C                | C      | T      | novel             | none       | MOF-AM2  | NA |
|                   | 0                | 0                | 0      | 0      | 0                 | 0          | Unknown  |    |
| Untested Somatic  | NA               | WXS              | none   | 0      | 0                 |            |          |    |
| Illumina_NextSeq  | NA               | NA               | 0      | NA     | 0                 | 0          | 0        | 0  |
|                   | 0                | 0                | 0      | 0      | 0                 | 0          | NA       | NA |
|                   | NA               | NA               | NA     | NA     | NA                | NA         | NA       | NA |
|                   | NA               | NA               | NA     | NA     | NA                | NA         | NA       | NA |
|                   | NA               | NA               | NA     | NA     | NA                | NA         | NA       | NA |
|                   | NA               | NA               | NA     | NA     | NA                | NA         | 0        | NA |
|                   | NA               | NA               | NA     | NA     | NA                | 0.000228   | 0.000000 | NA |
|                   | NA               | NA               | NA     | NA     | NA                | NA         | NA       | NA |
|                   | NA               | NA               | NA     | NA     | NA                | NA         | NA       | NA |
|                   | NA               | NA               | NA     | NA     | NA                | NA         | NA       | NA |
|                   | NA               | NA               | NA     | NA     | NA                | NA         | 0        | NA |
| RNF40             | NA               | Moffitt          | hs37d5 | 16     | 30773909          | 30773909 + |          |    |
| Missense_Mutation |                  | SNP              | T      | T      | G                 | novel      |          |    |
| none              | MOF-MA1          | NA               | 0      | 0      | 0                 | 0          | 0        | 0  |
|                   | Unknown          | Untested Somatic | NA     | WXS    | none              | 0          | 0        | 0  |
|                   | Illumina_NextSeq | NA               | NA     | c.T43G | NA                | p.S15A     |          |    |
| NM_014771         | exon2            | 0                | 0      | 0      | 0                 | 0          | 0        | 0  |
|                   | NA               | NA               | NA     | NA     | NA                | NA         | NA       | NA |
|                   | NA               | NA               | NA     | NA     | NA                | NA         | NA       | NA |
|                   | NA               | NA               | NA     | NA     | NA                | NA         | NA       | NA |
|                   | NA               | NA               | NA     | NA     | possibly_damaging |            |          | NA |
|                   | NA               | NA               | 0      | NA     | NA                | NA         | NA       | NA |



|                  |    |         |        |    |          |          |         |    |
|------------------|----|---------|--------|----|----------|----------|---------|----|
| Unknown          | NA | NA      | NA     | NA | NA       | NA       | 0       |    |
| SNP              | NA | Moffitt | hs37d5 | 16 | 59403056 | 59403056 | +       | 0  |
| 0                | 0  | C       | C      | T  | novel    | none     | MOF-AM5 | NA |
| Untested Somatic | NA | WXS     | none   | 0  | 0        | 0        | Unknown |    |
| 0                | 0  | 0       | 0      | 0  | 0        | 0        | NA      | NA |
| NA               | NA | NA      | NA     | NA | NA       | NA       | NA      | NA |
| NA               | NA | NA      | NA     | NA | NA       | NA       | NA      | NA |
| NA               | NA | NA      | NA     | NA | NA       | NA       | NA      | NA |
| NA               | NA | NA      | NA     | NA | NA       | NA       | 0       | NA |
| NA               | NA | NA      | NA     | NA | NA       | 0        | 0       | NA |
| NA               | NA | NA      | NA     | NA | NA       | NA       | NA      | NA |
| NA               | NA | NA      | NA     | NA | NA       | NA       | NA      | NA |
| NA               | NA | NA      | NA     | NA | NA       | NA       | NA      | NA |
| NA               | NA | NA      | NA     | NA | NA       | NA       | NA      | NA |
| Unknown          | NA | Moffitt | hs37d5 | 16 | 59403057 | 59403057 | +       | 0  |
| SNP              | NA | C       | C      | T  | novel    | none     | MOF-AM5 | NA |
| 0                | 0  | 0       | 0      | 0  | 0        | 0        | Unknown |    |
| Untested Somatic | NA | WXS     | none   | 0  | 0        | 0        |         |    |
| 0                | 0  | 0       | 0      | 0  | 0        | 0        | NA      | NA |
| NA               | NA | NA      | NA     | NA | NA       | NA       | NA      | NA |
| NA               | NA | NA      | NA     | NA | NA       | NA       | NA      | NA |
| NA               | NA | NA      | NA     | NA | NA       | NA       | NA      | NA |
| NA               | NA | NA      | NA     | NA | NA       | NA       | 0       | NA |
| NA               | NA | NA      | NA     | NA | NA       | 0        | 0       | NA |
| NA               | NA | NA      | NA     | NA | NA       | NA       | NA      | NA |
| NA               | NA | NA      | NA     | NA | NA       | NA       | NA      | NA |
| NA               | NA | NA      | NA     | NA | NA       | NA       | NA      | NA |
| NA               | NA | NA      | NA     | NA | NA       | NA       | NA      | NA |
| Unknown          | NA | Moffitt | hs37d5 | 16 | 65155819 | 65155819 | +       | 0  |
| SNP              | NA | C       | C      | G  | novel    | none     | MOF-MA1 | NA |
| 0                | 0  | 0       | 0      | 0  | 0        | 0        | Unknown |    |
| Untested Somatic | NA | WXS     | none   | 0  | 0        | 0        |         |    |
| 0                | 0  | 0       | 0      | 0  | 0        | 0        | NA      | NA |
| NA               | NA | NA      | NA     | NA | NA       | NA       | NA      | NA |
| NA               | NA | NA      | NA     | NA | NA       | NA       | NA      | NA |
| NA               | NA | NA      | NA     | NA | NA       | NA       | NA      | NA |
| NA               | NA | NA      | NA     | NA | NA       | NA       | 0       | NA |
| NA               | NA | NA      | NA     | NA | NA       | 0        | 0       | NA |
| NA               | NA | NA      | NA     | NA | NA       | NA       | NA      | NA |
| NA               | NA | NA      | NA     | NA | NA       | NA       | NA      | NA |
| NA               | NA | NA      | NA     | NA | NA       | NA       | NA      | NA |
| Unknown          | NA | Moffitt | hs37d5 | 16 | 67199398 | 67199398 | +       | 0  |
| SNP              | NA | A       | A      | C  | novel    | none     | MOF-MA1 | NA |
| 0                | 0  | 0       | 0      | 0  | 0        | 0        | Unknown |    |
| Untested Somatic | NA | WXS     | none   | 0  | 0        | 0        |         |    |







|                   |                  |          |         |     |                   |         |         |    |
|-------------------|------------------|----------|---------|-----|-------------------|---------|---------|----|
| PAFAH1B1          | NA               | Moffitt  | hs37d5  | 17  | 2570440           | 2570440 | +       |    |
| Missense_Mutation |                  |          | SNP     | T   | T                 | C       | novel   |    |
| none              | MOF-MA1          | NA       | 0       | 0   | 0                 | 0       | 0       | 0  |
|                   | Unknown          | Untested | Somatic | NA  | WXS               | none    | 0       | 0  |
|                   | Illumina_NextSeq | NA       | NA      | NA  | c.T347C           | NA      | p.F116S |    |
| NM_000430         | exon5            | 0        | 0       | 0   | 0                 | 0       | 0       | 0  |
|                   | NA               | NA       | NA      | NA  | NA                | NA      | NA      | NA |
|                   | NA               | NA       | NA      | NA  | NA                | NA      | NA      | NA |
|                   | NA               | NA       | NA      | NA  | NA                | NA      | NA      | NA |
|                   | NA               | NA       | NA      | NA  | probably_damaging |         |         | NA |
|                   | NA               | NA       | 0       | NA  | NA                | NA      | NA      | NA |
|                   | NA               | 0        | 0       | NA  | NA                | NA      | NA      | NA |
|                   | NA               | NA       | NA      | NA  | NA                | NA      | NA      | NA |
|                   | NA               | NA       | NA      | NA  | NA                | NA      | NA      | NA |
|                   | NA               | NA       | NA      | NA  | NA                | NA      | NA      | NA |
|                   | NA               | NA       | 0       | NA  | NA                | NA      | NA      | NA |
| ALOX15            | NA               | Moffitt  | hs37d5  | 17  | 4542812           | 4542812 | +       |    |
| Nonsense_Mutation |                  |          | SNP     | G   | G                 | A       | novel   |    |
| none              | MOF-AM2          | NA       | 0       | 0   | 0                 | 0       | 0       | 0  |
|                   | Unknown          | Untested | Somatic | NA  | WXS               | none    | 0       | 0  |
|                   | Illumina_NextSeq | NA       | NA      | NA  | c.C250T           | NA      | p.Q84X  |    |
| NM_001140         | exon2            | 0        | 0       | 0   | 0                 | 0       | 0       | 0  |
|                   | NA               | NA       | NA      | NA  | NA                | NA      | NA      | NA |
|                   | NA               | NA       | NA      | NA  | NA                | NA      | NA      | NA |
|                   | NA               | NA       | NA      | NA  | NA                | NA      | NA      | NA |
|                   | NA               | NA       | NA      | NA  | possibly_damaging |         |         | NA |
|                   | NA               | NA       | 0       | NA  | NA                | NA      | NA      | NA |
|                   | NA               | 0        | 0       | NA  | NA                | NA      | NA      | NA |
|                   | NA               | NA       | NA      | NA  | NA                | NA      | NA      | NA |
|                   | NA               | NA       | NA      | NA  | NA                | NA      | NA      | NA |
|                   | NA               | NA       | NA      | NA  | NA                | NA      | NA      | NA |
|                   | NA               | NA       | NA      | NA  | NA                | NA      | NA      | NA |
|                   | NA               | NA       | 0       | NA  | NA                | NA      | NA      | NA |
| Unknown           | NA               | Moffitt  | hs37d5  | 17  | 5328662           | 5328662 | +       | 0  |
|                   | SNP              | T        | T       | C   | novel             | none    | MOF-MA1 | NA |
|                   | 0                | 0        | 0       | 0   | 0                 | 0       | Unknown |    |
|                   | Untested         | Somatic  | NA      | WXS | none              | 0       |         |    |
|                   | Illumina_NextSeq | NA       | NA      | 0   | NA                | 0       | 0       | 0  |
|                   | 0                | 0        | 0       | 0   | 0                 | 0       | NA      | NA |
|                   | NA               | NA       | NA      | NA  | NA                | NA      | NA      | NA |
|                   | NA               | NA       | NA      | NA  | NA                | NA      | NA      | NA |
|                   | NA               | NA       | NA      | NA  | NA                | NA      | NA      | NA |
|                   | NA               | NA       | NA      | NA  | NA                | NA      | 0       | NA |
|                   | NA               | NA       | NA      | NA  | NA                | 0       | 0       | NA |
|                   | NA               | NA       | NA      | NA  | NA                | NA      | NA      | NA |
|                   | NA               | NA       | NA      | NA  | NA                | NA      | NA      | NA |
|                   | NA               | NA       | NA      | NA  | NA                | NA      | NA      | NA |
|                   | NA               | NA       | NA      | NA  | NA                | NA      | 0       |    |
| NEURL4            | NA               | Moffitt  | hs37d5  | 17  | 7224188           | 7224188 | +       |    |
| Missense_Mutation |                  |          | SNP     | C   | C                 | T       | novel   |    |
| none              | MOF-AM2          | NA       | 0       | 0   | 0                 | 0       | 0       | 0  |





|                   |                  |                  |        |         |          |          |         |    |
|-------------------|------------------|------------------|--------|---------|----------|----------|---------|----|
|                   | NA               | NA               | NA     | NA      | NA       | NA       | NA      | NA |
|                   | NA               | NA               | NA     | NA      | NA       | NA       | NA      | NA |
|                   | NA               | NA               | NA     | NA      | NA       | NA       | 0       | NA |
|                   | NA               | NA               | NA     | NA      | NA       | 0        | 0       | NA |
|                   | NA               | NA               | NA     | NA      | NA       | NA       | NA      | NA |
|                   | NA               | NA               | NA     | NA      | NA       | NA       | NA      | NA |
|                   | NA               | NA               | NA     | NA      | NA       | NA       | NA      | NA |
|                   | NA               | NA               | NA     | NA      | NA       | NA       | 0       | NA |
| Unknown           | NA               | Moffitt          | hs37d5 | 17      | 8013401  | 8013401  | +       | 0  |
|                   | SNP              | G                | G      | A       | novel    | none     | MOF-MA1 | NA |
|                   | 0                | 0                | 0      | 0       | 0        | 0        | Unknown |    |
| Untested Somatic  | NA               | WXS              | none   | 0       | 0        | 0        |         |    |
| Illumina_NextSeq  | NA               | NA               | 0      | NA      | 0        | 0        | 0       | 0  |
|                   | 0                | 0                | 0      | 0       | 0        | 0        | NA      | NA |
|                   | NA               | NA               | NA     | NA      | NA       | NA       | NA      | NA |
|                   | NA               | NA               | NA     | NA      | NA       | NA       | NA      | NA |
|                   | NA               | NA               | NA     | NA      | NA       | NA       | NA      | NA |
|                   | NA               | NA               | NA     | NA      | NA       | NA       | 0       | NA |
|                   | NA               | NA               | NA     | NA      | NA       | 0        | 0       | NA |
|                   | NA               | NA               | NA     | NA      | NA       | NA       | NA      | NA |
|                   | NA               | NA               | NA     | NA      | NA       | NA       | NA      | NA |
|                   | NA               | NA               | NA     | NA      | NA       | NA       | NA      | NA |
|                   | NA               | NA               | NA     | NA      | NA       | NA       | NA      | NA |
|                   | NA               | NA               | NA     | NA      | NA       | NA       | 0       | NA |
| MYH13             | NA               | Moffitt          | hs37d5 | 17      | 10265802 | 10265802 | +       |    |
| Missense_Mutation |                  |                  | SNP    | C       | C        | A        | novel   |    |
| none              | MOF-MA1          | NA               | 0      | 0       | 0        | 0        | 0       | 0  |
|                   | Unknown          | Untested Somatic | NA     | WXS     | none     | 0        | 0       | 0  |
|                   | Illumina_NextSeq | NA               | NA     | c.G223T | NA       | p.D75Y   |         |    |
| NM_003802         | exon4            | 0                | 0      | 0       | 0        | 0        | 0       | 0  |
|                   | NA               | NA               | NA     | NA      | NA       | NA       | NA      | NA |
|                   | NA               | NA               | NA     | NA      | NA       | NA       | NA      | NA |
|                   | NA               | NA               | NA     | NA      | NA       | NA       | NA      | NA |
|                   | NA               | NA               | NA     | NA      | NA       | NA       | NA      | NA |
|                   | 0                | NA               | NA     | NA      | NA       | NA       | NA      | 0  |
|                   | 0                | NA               | NA     | NA      | NA       | NA       | NA      | NA |
|                   | NA               | NA               | NA     | NA      | NA       | NA       | NA      | NA |
|                   | NA               | NA               | NA     | NA      | NA       | NA       | NA      | NA |
|                   | NA               | NA               | NA     | NA      | NA       | NA       | NA      | NA |
|                   | 1                |                  |        |         |          |          |         |    |
| Unknown           | NA               | Moffitt          | hs37d5 | 17      | 10633268 | 10633268 | +       | 0  |
|                   | SNP              | G                | G      | C       | novel    | none     | MOF-MA1 | NA |
|                   | 0                | 0                | 0      | 0       | 0        | 0        | Unknown |    |
| Untested Somatic  | NA               | WXS              | none   | 0       | 0        | 0        |         |    |
| Illumina_NextSeq  | NA               | NA               | 0      | NA      | 0        | 0        | 0       | 0  |
|                   | 0                | 0                | 0      | 0       | 0        | 0        | NA      | NA |
|                   | NA               | NA               | NA     | NA      | NA       | NA       | NA      | NA |
|                   | NA               | NA               | NA     | NA      | NA       | NA       | NA      | NA |
|                   | NA               | NA               | NA     | NA      | NA       | NA       | NA      | NA |
|                   | NA               | NA               | NA     | NA      | NA       | NA       | 0       | NA |
|                   | NA               | NA               | NA     | NA      | NA       | 0        | 0       | NA |



|                  |     |         |          |    |          |            |           |    |
|------------------|-----|---------|----------|----|----------|------------|-----------|----|
| Unknown          | NA  | Moffitt | hs37d5   | 17 | 27277072 | 27277072 + | 0         |    |
|                  | SNP | C       | C        | T  | novel    | none       | MOF-MA1   | NA |
|                  | 0   | 0       | 0        | 0  | 0        | 0          | Unknown   |    |
| Untested Somatic | NA  | WXS     | none     | 0  | 0        | 0          |           |    |
| Illumina_NextSeq | NA  | NA      | 0        | NA | 0        | 0          | NA        | NA |
|                  | 0   | 0       | 0        | 0  | 0        | 0          | NA        | NA |
|                  | NA  | NA      | NA       | NA | NA       | NA         | NA        | NA |
|                  | NA  | NA      | NA       | NA | NA       | NA         | NA        | NA |
|                  | NA  | NA      | NA       | NA | NA       | NA         | NA        | NA |
|                  | NA  | NA      | NA       | NA | NA       | NA         | 0         | NA |
|                  | NA  | NA      | NA       | NA | NA       | 0          | 0         | NA |
|                  | NA  | NA      | NA       | NA | NA       | NA         | NA        | NA |
|                  | NA  | NA      | NA       | NA | NA       | NA         | NA        | NA |
|                  | NA  | NA      | NA       | NA | NA       | NA         | NA        | NA |
|                  | NA  | NA      | NA       | NA | NA       | NA         | NA        | NA |
|                  | NA  | NA      | NA       | NA | NA       | NA         | 0         | NA |
| Unknown          | NA  | Moffitt | hs37d5   | 17 | 28011505 | 28011505 + | 0         |    |
|                  | SNP | A       | A        | T  | novel    | none       | MOF-MA1   | NA |
|                  | 0   | 0       | 0        | 0  | 0        | 0          | Unknown   |    |
| Untested Somatic | NA  | WXS     | none     | 0  | 0        | 0          |           |    |
| Illumina_NextSeq | NA  | NA      | 0        | NA | 0        | 0          | NA        | NA |
|                  | 0   | 0       | 0        | 0  | 0        | 0          | NA        | NA |
|                  | NA  | NA      | NA       | NA | NA       | NA         | NA        | NA |
|                  | NA  | NA      | NA       | NA | NA       | NA         | NA        | NA |
|                  | NA  | NA      | NA       | NA | NA       | NA         | NA        | NA |
|                  | NA  | NA      | NA       | NA | NA       | NA         | NA        | NA |
|                  | NA  | NA      | NA       | NA | NA       | NA         | 0         | NA |
|                  | NA  | NA      | NA       | NA | NA       | 0          | 0         | NA |
|                  | NA  | NA      | NA       | NA | NA       | NA         | NA        | NA |
|                  | NA  | NA      | NA       | NA | NA       | NA         | NA        | NA |
|                  | NA  | NA      | NA       | NA | NA       | NA         | NA        | NA |
|                  | NA  | NA      | NA       | NA | NA       | NA         | NA        | NA |
|                  | NA  | NA      | NA       | NA | NA       | NA         | 0         | NA |
| Unknown          | NA  | Moffitt | hs37d5   | 17 | 29326352 | 29326352 + | 0         |    |
|                  | SNP | G       | G        | A  | novel    | none       | MOF-MA1   | NA |
|                  | 0   | 0       | 0        | 0  | 0        | 0          | Unknown   |    |
| Untested Somatic | NA  | WXS     | none     | 0  | 0        | 0          |           |    |
| Illumina_NextSeq | NA  | NA      | 0        | NA | 0        | 0          | NA        | NA |
|                  | 0   | 0       | 0        | 0  | 0        | 0          | NA        | NA |
|                  | NA  | NA      | NA       | NA | NA       | NA         | NA        | NA |
|                  | NA  | NA      | NA       | NA | NA       | NA         | NA        | NA |
|                  | NA  | NA      | NA       | NA | NA       | NA         | NA        | NA |
|                  | NA  | NA      | NA       | NA | NA       | NA         | NA        | NA |
|                  | NA  | NA      | NA       | NA | NA       | NA         | 0         | NA |
|                  | NA  | NA      | NA       | NA | NA       | 0          | 0         | NA |
|                  | NA  | NA      | NA       | NA | NA       | NA         | NA        | NA |
|                  | NA  | NA      | NA       | NA | NA       | NA         | NA        | NA |
|                  | NA  | NA      | NA       | NA | NA       | NA         | NA        | NA |
|                  | NA  | NA      | NA       | NA | NA       | NA         | NA        | NA |
|                  | NA  | NA      | NA       | NA | NA       | NA         | 0         | NA |
| MY01D            | NA  | Moffitt | hs37d5   | 17 | 30986327 | 30986327 + | 0         |    |
| Silent           | SNP | C       | C        | G  | novel    | none       | MOF-AM2   | NA |
|                  | 0   | 0       | 0        | 0  | 0        | 0          | Unknown   |    |
| Untested Somatic | NA  | WXS     | none     | 0  | 0        | 0          |           |    |
| Illumina_NextSeq | NA  | NA      | c.G2151C | NA | NA       | p.R717R    | NM_015194 |    |





|                   |                  |         |            |      |          |            |         |    |
|-------------------|------------------|---------|------------|------|----------|------------|---------|----|
|                   | NA               | NA      | NA         | NA   | NA       | NA         | NA      | NA |
|                   | NA               | NA      | NA         | NA   | NA       | NA         | 0       | NA |
| Unknown           | NA               | Moffitt | hs37d5     | 17   | 39963161 | 39963161 + |         | 0  |
|                   | SNP              | T       | T          | G    | novel    | none       | MOF-MA1 | NA |
|                   | 0                | 0       | 0          | 0    | 0        | 0          | Unknown |    |
| Untested Somatic  | NA               | WXS     | none       | 0    | 0        | 0          |         |    |
| Illumina_NextSeq  | NA               | NA      | 0          | NA   | 0        | 0          | NA      | NA |
|                   | 0                | 0       | 0          | 0    | 0        | 0          | NA      | NA |
|                   | NA               | NA      | NA         | NA   | NA       | NA         | NA      | NA |
|                   | NA               | NA      | NA         | NA   | NA       | NA         | NA      | NA |
|                   | NA               | NA      | NA         | NA   | NA       | NA         | NA      | NA |
|                   | NA               | NA      | NA         | NA   | NA       | NA         | 0       | NA |
|                   | NA               | NA      | NA         | NA   | NA       | 0          | 0       | NA |
|                   | NA               | NA      | NA         | NA   | NA       | NA         | NA      | NA |
|                   | NA               | NA      | NA         | NA   | NA       | NA         | NA      | NA |
|                   | NA               | NA      | NA         | NA   | NA       | NA         | NA      | NA |
|                   | NA               | NA      | NA         | NA   | NA       | NA         | NA      | NA |
|                   | NA               | NA      | NA         | NA   | NA       | NA         | 0       | NA |
| Unknown           | NA               | Moffitt | hs37d5     | 17   | 40990883 | 40990883 + |         | 0  |
|                   | SNP              | C       | C          | T    | novel    | none       | MOF-AM2 | NA |
|                   | 0                | 0       | 0          | 0    | 0        | 0          | Unknown |    |
| Untested Somatic  | NA               | WXS     | none       | 0    | 0        | 0          |         |    |
| Illumina_NextSeq  | NA               | NA      | 0          | NA   | 0        | 0          | NA      | NA |
|                   | 0                | 0       | 0          | 0    | 0        | 0          | NA      | NA |
|                   | NA               | NA      | NA         | NA   | NA       | NA         | NA      | NA |
|                   | NA               | NA      | NA         | NA   | NA       | NA         | NA      | NA |
|                   | NA               | NA      | NA         | NA   | NA       | NA         | NA      | NA |
|                   | NA               | NA      | NA         | NA   | NA       | NA         | NA      | NA |
|                   | NA               | NA      | NA         | NA   | NA       | NA         | 0       | NA |
|                   | NA               | NA      | NA         | NA   | NA       | 0          | 0       | NA |
|                   | NA               | NA      | NA         | NA   | NA       | NA         | NA      | NA |
|                   | NA               | NA      | NA         | NA   | NA       | NA         | NA      | NA |
|                   | NA               | NA      | NA         | NA   | NA       | NA         | NA      | NA |
|                   | NA               | NA      | NA         | NA   | NA       | NA         | NA      | NA |
|                   | NA               | NA      | NA         | NA   | NA       | NA         | NA      | NA |
|                   | NA               | NA      | NA         | NA   | NA       | NA         | 0       | NA |
| RUNDC3A           | NA               | Moffitt | hs37d5     | 17   | 42392690 | 42392690 + |         |    |
| Splice_Site       | SNP              | T       | T          | G    | novel    | none       |         |    |
| MOF-MA1           | NA               | 0       | 0          | 0    | 0        | 0          | 0       |    |
| Unknown           | Untested Somatic | NA      | WXS        | none | 0        | 0          | 0       |    |
| Illumina_NextSeq  | NA               | NA      | c.795+2T>G | NA   | NA       | 0          | 0       |    |
| NM_001144825      | exon7            | 0       | 0          | 0    | 0        | 0          | 0       | 0  |
|                   | NA               | NA      | NA         | NA   | NA       | NA         | NA      | NA |
|                   | NA               | NA      | NA         | NA   | NA       | NA         | NA      | NA |
|                   | NA               | NA      | NA         | NA   | NA       | NA         | NA      | NA |
|                   | NA               | NA      | NA         | NA   | NA       | NA         | NA      | NA |
|                   | 0                | NA      | NA         | NA   | NA       | NA         | NA      | 0  |
|                   | 0                | NA      | NA         | NA   | NA       | NA         | NA      | NA |
|                   | NA               | NA      | NA         | NA   | NA       | NA         | NA      | NA |
|                   | NA               | NA      | NA         | NA   | NA       | NA         | NA      | NA |
|                   | NA               | NA      | NA         | NA   | NA       | NA         | NA      | NA |
|                   | 0                |         |            |      |          |            |         |    |
| CDC27             | NA               | Moffitt | hs37d5     | 17   | 45221280 | 45221280 + |         |    |
| Missense_Mutation |                  | SNP     | C          | C    | T        | novel      |         |    |



|                   |                  |          |         |      |                   |          |           |    |
|-------------------|------------------|----------|---------|------|-------------------|----------|-----------|----|
|                   | NA               | NA       | NA      | NA   | NA                | NA       | NA        | NA |
|                   | NA               | NA       | NA      | NA   | NA                | NA       | NA        | NA |
|                   | NA               | NA       | NA      | NA   | NA                | NA       | NA        | NA |
|                   | NA               | NA       | NA      | NA   | NA                | NA       | 0         | NA |
|                   | NA               | NA       | NA      | NA   | NA                | 0        | 0         | NA |
|                   | NA               | NA       | NA      | NA   | NA                | NA       | NA        | NA |
|                   | NA               | NA       | NA      | NA   | NA                | NA       | NA        | NA |
|                   | NA               | NA       | NA      | NA   | NA                | NA       | NA        | NA |
|                   | NA               | NA       | NA      | NA   | NA                | NA       | 0         | NA |
| CACNA1G           | NA               | Moffitt  | hs37d5  | 17   | 48653295          | 48653295 | +         |    |
| Missense_Mutation |                  |          | SNP     | C    | C                 | T        | novel     |    |
| none              | MOF-MA1          | NA       | 0       | 0    | 0                 | 0        | 0         | 0  |
|                   | Unknown          | Untested | Somatic | NA   | WXS               | none     | 0         | 0  |
|                   | Illumina_NextSeq | NA       | NA      | NA   | c.C1532T          | NA       | p.T511M   |    |
| NM_018896         | exon8            | 0        | 0       | 0    | 0                 | 0        | 0         | 0  |
|                   | NA               | NA       | NA      | NA   | NA                | NA       | NA        | NA |
|                   | NA               | NA       | NA      | NA   | NA                | NA       | NA        | NA |
|                   | NA               | NA       | NA      | NA   | NA                | NA       | NA        | NA |
|                   | NA               | NA       | NA      | NA   | NA                | NA       | NA        | NA |
|                   | 0                | NA       | NA      | NA   | NA                | NA       | NA        | 0  |
|                   | 0                | NA       | NA      | NA   | NA                | NA       | NA        | NA |
|                   | NA               | NA       | NA      | NA   | NA                | NA       | NA        | NA |
|                   | NA               | NA       | NA      | NA   | NA                | NA       | NA        | NA |
|                   | NA               | NA       | NA      | NA   | NA                | NA       | NA        | NA |
|                   | 0                | NA       | NA      | NA   | NA                | NA       | NA        | NA |
| USP32             | NA               | Moffitt  | hs37d5  | 17   | 58348826          | 58348826 | +         |    |
| Silent            | SNP              | G        | G       | T    | novel             | none     | MOF-AM2   | NA |
|                   | 0                | 0        | 0       | 0    | 0                 | 0        | Unknown   |    |
| Untested          | Somatic          | NA       | WXS     | none | 0                 | 0        |           |    |
| Illumina_NextSeq  | NA               | NA       | c.C588A | NA   | NA                | p.I196I  | NM_032582 |    |
|                   | exon6            | 0        | 0       | 0    | 0                 | 0        | 0         | NA |
|                   | NA               | NA       | NA      | NA   | NA                | NA       | NA        | NA |
|                   | NA               | NA       | NA      | NA   | NA                | NA       | NA        | NA |
|                   | NA               | NA       | NA      | NA   | NA                | NA       | NA        | NA |
|                   | NA               | NA       | NA      | NA   | NA                | NA       | NA        | 0  |
|                   | NA               | NA       | NA      | NA   | NA                | NA       | 0         | 0  |
|                   | NA               | NA       | NA      | NA   | NA                | NA       | NA        | NA |
|                   | NA               | NA       | NA      | NA   | NA                | NA       | NA        | NA |
|                   | NA               | NA       | NA      | NA   | NA                | NA       | NA        | NA |
|                   | NA               | NA       | NA      | NA   | NA                | NA       | NA        | 0  |
| USP32             | NA               | Moffitt  | hs37d5  | 17   | 58348833          | 58348833 | +         |    |
| Missense_Mutation |                  |          | SNP     | G    | G                 | A        | novel     |    |
| none              | MOF-AM2          | NA       | 0       | 0    | 0                 | 0        | 0         | 0  |
|                   | Unknown          | Untested | Somatic | NA   | WXS               | none     | 0         | 0  |
|                   | Illumina_NextSeq | NA       | NA      | NA   | c.C581T           | NA       | p.S194L   |    |
| NM_032582         | exon6            | 0        | 0       | 0    | 0                 | 0        | 0         | 0  |
|                   | NA               | NA       | NA      | NA   | NA                | NA       | NA        | NA |
|                   | NA               | NA       | NA      | NA   | NA                | NA       | NA        | NA |
|                   | NA               | NA       | NA      | NA   | NA                | NA       | NA        | NA |
|                   | NA               | NA       | NA      | NA   | probably_damaging |          |           | NA |





|                   |                  |          |         |    |                   |          |         |    |
|-------------------|------------------|----------|---------|----|-------------------|----------|---------|----|
|                   | NA               | NA       | NA      | NA | NA                | NA       | 0       |    |
| PRKCA             | NA               | Moffitt  | hs37d5  | 17 | 64738772          | 64738772 | +       |    |
| Missense_Mutation |                  |          | SNP     | C  | C                 | T        | novel   |    |
| none              | MOF-AM2          | NA       | 0       | 0  | 0                 | 0        | 0       | 0  |
|                   | Unknown          | Untested | Somatic | NA | WXS               | none     | 0       | 0  |
|                   | Illumina_NextSeq | NA       | NA      | NA | c.C1418T          | NA       | p.S473L |    |
| NM_002737         | exon13           | 0        | 0       | 0  | 0                 | 0        | 0       | 0  |
|                   | NA               | NA       | NA      | NA | NA                | NA       | NA      | NA |
|                   | NA               | NA       | NA      | NA | NA                | NA       | NA      | NA |
|                   | NA               | NA       | NA      | NA | NA                | NA       | NA      | NA |
|                   | NA               | NA       | NA      | NA | possibly_damaging |          |         | NA |
|                   | NA               | NA       | 0       | NA | NA                | NA       | NA      | NA |
|                   | NA               | 0        | 0       | NA | NA                | NA       | NA      | NA |
|                   | NA               | NA       | NA      | NA | NA                | NA       | NA      | NA |
|                   | NA               | NA       | NA      | NA | NA                | NA       | NA      | NA |
|                   | NA               | NA       | NA      | NA | NA                | NA       | NA      | NA |
|                   | NA               | NA       | 0       | NA | NA                | NA       | NA      | NA |
| Unknown           | NA               | Moffitt  | hs37d5  | 17 | 76116639          | 76116639 | +       | 0  |
|                   | SNP              | G        | G       | T  | novel             | none     | MOF-AM2 | NA |
|                   | 0                | 0        | 0       | 0  | 0                 | 0        | Unknown |    |
| Untested Somatic  | NA               | WXS      | none    | 0  | 0                 | 0        |         |    |
| Illumina_NextSeq  | NA               | NA       | 0       | NA | 0                 | 0        | NA      | NA |
|                   | 0                | 0        | 0       | 0  | 0                 | 0        | NA      | NA |
|                   | NA               | NA       | NA      | NA | NA                | NA       | NA      | NA |
|                   | NA               | NA       | NA      | NA | NA                | NA       | NA      | NA |
|                   | NA               | NA       | NA      | NA | NA                | NA       | NA      | NA |
|                   | NA               | NA       | NA      | NA | NA                | NA       | 0       | NA |
|                   | NA               | NA       | NA      | NA | NA                | 0        | 0       | NA |
|                   | NA               | NA       | NA      | NA | NA                | NA       | NA      | NA |
|                   | NA               | NA       | NA      | NA | NA                | NA       | NA      | NA |
|                   | NA               | NA       | NA      | NA | NA                | NA       | NA      | NA |
|                   | NA               | NA       | NA      | NA | NA                | NA       | NA      | NA |
|                   | NA               | NA       | NA      | NA | NA                | NA       | 0       |    |
| BIRC5             | NA               | Moffitt  | hs37d5  | 17 | 76212846          | 76212846 | +       |    |
| Missense_Mutation |                  |          | SNP     | G  | G                 | A        | novel   |    |
| none              | MOF-AM2          | NA       | 0       | 0  | 0                 | 0        | 0       | 0  |
|                   | Unknown          | Untested | Somatic | NA | WXS               | none     | 0       | 0  |
|                   | Illumina_NextSeq | NA       | NA      | NA | c.G392A           | NA       | p.R131K |    |
| NM_001012271      | exon4            | 0        | 0       | 0  | 0                 | 0        | 0       | 0  |
|                   | NA               | NA       | NA      | NA | NA                | NA       | NA      | NA |
|                   | NA               | NA       | NA      | NA | NA                | NA       | NA      | NA |
|                   | NA               | NA       | NA      | NA | NA                | NA       | NA      | NA |
|                   | NA               | NA       | NA      | NA | possibly_damaging |          |         | NA |
|                   | NA               | NA       | 0       | NA | NA                | NA       | NA      | NA |
|                   | NA               | 0        | 0       | NA | NA                | NA       | NA      | NA |
|                   | NA               | NA       | NA      | NA | NA                | NA       | NA      | NA |
|                   | NA               | NA       | NA      | NA | NA                | NA       | NA      | NA |
|                   | NA               | NA       | NA      | NA | NA                | NA       | NA      | NA |
|                   | NA               | NA       | NA      | NA | NA                | NA       | NA      | NA |
|                   | NA               | NA       | 0       | NA | NA                | NA       | NA      | NA |
| DNAH17            | NA               | Moffitt  | hs37d5  | 17 | 76445646          | 76445646 | +       |    |
| Silent            | SNP              | C        | C       | T  | novel             | none     | MOF-AM2 | NA |







|                   |                  |          |         |    |          |          |          |    |
|-------------------|------------------|----------|---------|----|----------|----------|----------|----|
| LAMA1             | NA               | Moffitt  | hs37d5  | 18 | 7011474  | 7011474  | +        |    |
| Missense_Mutation |                  |          | SNP     | G  | G        | A        | novel    |    |
| none              | MOF-AM2          | NA       | 0       | 0  | 0        | 0        | 0        | 0  |
|                   | Unknown          | Untested | Somatic | NA | WXS      | none     | 0        | 0  |
|                   | Illumina_NextSeq | NA       | NA      | NA | c.C3512T | NA       | p.T1171M |    |
| NM_005559         | exon25           | 0        | 0       | 0  | 0        | 0        | 0        | 0  |
|                   | NA               | NA       | NA      | NA | NA       | NA       | NA       | NA |
|                   | NA               | NA       | NA      | NA | NA       | NA       | NA       | NA |
|                   | NA               | NA       | NA      | NA | NA       | NA       | NA       | NA |
|                   | NA               | NA       | NA      | NA | benign   | NA       | NA       | NA |
|                   | 0                | NA       | NA      | NA | NA       | NA       | NA       | 0  |
|                   | 0                | NA       | NA      | NA | NA       | NA       | NA       | NA |
|                   | NA               | NA       | NA      | NA | NA       | NA       | NA       | NA |
|                   | NA               | NA       | NA      | NA | NA       | NA       | NA       | NA |
|                   | NA               | NA       | NA      | NA | NA       | NA       | NA       | NA |
|                   | 0                |          |         |    |          |          |          |    |
| Unknown           | NA               | Moffitt  | hs37d5  | 18 | 19029813 | 19029813 | +        | 0  |
|                   | SNP              | G        | G       | T  | novel    | none     | MOF-AM2  | NA |
|                   | 0                | 0        | 0       | 0  | 0        | 0        | Unknown  |    |
| Untested Somatic  | NA               | WXS      | none    | 0  | 0        | 0        |          |    |
| Illumina_NextSeq  | NA               | NA       | 0       | NA | 0        | 0        | 0        | 0  |
|                   | 0                | 0        | 0       | 0  | 0        | 0        | NA       | NA |
|                   | NA               | NA       | NA      | NA | NA       | NA       | NA       | NA |
|                   | NA               | NA       | NA      | NA | NA       | NA       | NA       | NA |
|                   | NA               | NA       | NA      | NA | NA       | NA       | NA       | NA |
|                   | NA               | NA       | NA      | NA | NA       | NA       | 0        | NA |
|                   | NA               | NA       | NA      | NA | NA       | 0        | 0        | NA |
|                   | NA               | NA       | NA      | NA | NA       | NA       | NA       | NA |
|                   | NA               | NA       | NA      | NA | NA       | NA       | NA       | NA |
|                   | NA               | NA       | NA      | NA | NA       | NA       | NA       | NA |
|                   | NA               | NA       | NA      | NA | NA       | NA       | 0        |    |
| LAMA3             | NA               | Moffitt  | hs37d5  | 18 | 21269772 | 21269772 | +        |    |
| Missense_Mutation |                  |          | SNP     | C  | C        | A        | novel    |    |
| none              | MOF-MA1          | NA       | 0       | 0  | 0        | 0        | 0        | 0  |
|                   | Unknown          | Untested | Somatic | NA | WXS      | none     | 0        | 0  |
|                   | Illumina_NextSeq | NA       | NA      | NA | c.C125A  | NA       | p.A42E   |    |
| NM_198129         | exon1            | 0        | 0       | 0  | 0        | 0        | 0        | 0  |
|                   | NA               | NA       | NA      | NA | NA       | NA       | NA       | NA |
|                   | NA               | NA       | NA      | NA | NA       | NA       | NA       | NA |
|                   | NA               | NA       | NA      | NA | NA       | NA       | NA       | NA |
|                   | NA               | NA       | NA      | NA | benign   | NA       | NA       | NA |
|                   | 0                | NA       | NA      | NA | NA       | NA       | NA       | 0  |
|                   | 0                | NA       | NA      | NA | NA       | NA       | NA       | NA |
|                   | NA               | NA       | NA      | NA | NA       | NA       | NA       | NA |
|                   | NA               | NA       | NA      | NA | NA       | NA       | NA       | NA |
|                   | NA               | NA       | NA      | NA | NA       | NA       | NA       | NA |
|                   | 0                |          |         |    |          |          |          |    |
| DSG4              | NA               | Moffitt  | hs37d5  | 18 | 28970744 | 28970744 | +        |    |
| Missense_Mutation |                  |          | SNP     | A  | A        | C        | novel    |    |
| none              | MOF-AM2          | NA       | 0       | 0  | 0        | 0        | 0        | 0  |



|                   |                  |                  |        |         |          |          |         |    |
|-------------------|------------------|------------------|--------|---------|----------|----------|---------|----|
|                   | NA               | NA               | NA     | NA      | NA       | NA       | NA      | NA |
|                   | NA               | NA               | NA     | NA      | NA       | NA       | NA      | NA |
|                   | NA               | NA               | NA     | NA      | NA       | NA       | 0       | NA |
|                   | NA               | NA               | NA     | NA      | NA       | 0        | 0       | NA |
|                   | NA               | NA               | NA     | NA      | NA       | NA       | NA      | NA |
|                   | NA               | NA               | NA     | NA      | NA       | NA       | NA      | NA |
|                   | NA               | NA               | NA     | NA      | NA       | NA       | NA      | NA |
|                   | NA               | NA               | NA     | NA      | NA       | NA       | 0       | NA |
| Unknown           | NA               | Moffitt          | hs37d5 | 18      | 70531997 | 70531997 | +       | 0  |
|                   | SNP              | G                | G      | T       | novel    | none     | MOF-AM5 | NA |
|                   | 0                | 0                | 0      | 0       | 0        | 0        | Unknown |    |
| Untested Somatic  | NA               | WXS              | none   | 0       | 0        | 0        |         | 0  |
| Illumina_NextSeq  | NA               | NA               | 0      | NA      | 0        | 0        | 0       | 0  |
|                   | 0                | 0                | 0      | 0       | 0        | 0        | NA      | NA |
|                   | NA               | NA               | NA     | NA      | NA       | NA       | NA      | NA |
|                   | NA               | NA               | NA     | NA      | NA       | NA       | NA      | NA |
|                   | NA               | NA               | NA     | NA      | NA       | NA       | NA      | NA |
|                   | NA               | NA               | NA     | NA      | NA       | NA       | 0       | NA |
|                   | NA               | NA               | NA     | NA      | NA       | 0        | 0       | NA |
|                   | NA               | NA               | NA     | NA      | NA       | NA       | NA      | NA |
|                   | NA               | NA               | NA     | NA      | NA       | NA       | NA      | NA |
|                   | NA               | NA               | NA     | NA      | NA       | NA       | NA      | NA |
|                   | NA               | NA               | NA     | NA      | NA       | NA       | 0       | NA |
| Unknown           | NA               | Moffitt          | hs37d5 | 18      | 70534575 | 70534575 | +       | 0  |
|                   | SNP              | G                | G      | C       | novel    | none     | MOF-MA1 | NA |
|                   | 0                | 0                | 0      | 0       | 0        | 0        | Unknown |    |
| Untested Somatic  | NA               | WXS              | none   | 0       | 0        | 0        |         | 0  |
| Illumina_NextSeq  | NA               | NA               | 0      | NA      | 0        | 0        | 0       | 0  |
|                   | 0                | 0                | 0      | 0       | 0        | 0        | NA      | NA |
|                   | NA               | NA               | NA     | NA      | NA       | NA       | NA      | NA |
|                   | NA               | NA               | NA     | NA      | NA       | NA       | NA      | NA |
|                   | NA               | NA               | NA     | NA      | NA       | NA       | NA      | NA |
|                   | NA               | NA               | NA     | NA      | NA       | NA       | 0       | NA |
|                   | NA               | NA               | NA     | NA      | NA       | 0        | 0       | NA |
|                   | NA               | NA               | NA     | NA      | NA       | NA       | NA      | NA |
|                   | NA               | NA               | NA     | NA      | NA       | NA       | NA      | NA |
|                   | NA               | NA               | NA     | NA      | NA       | NA       | NA      | NA |
|                   | NA               | NA               | NA     | NA      | NA       | NA       | 0       | NA |
| FAM69C            | NA               | Moffitt          | hs37d5 | 18      | 72114190 | 72114190 | +       |    |
| Missense_Mutation |                  | SNP              | C      | C       |          | T        | novel   |    |
| none              | MOF-AM5          | NA               | 0      | 0       | 0        | 0        | 0       | 0  |
|                   | Unknown          | Untested Somatic | NA     | WXS     | none     | 0        | 0       | 0  |
|                   | Illumina_NextSeq | NA               | NA     | c.G527A | NA       | p.R176Q  |         |    |
| NM_001044369      | exon2            | 0                | 0      | 0       | 0        | 0        | 0       | 0  |
|                   | NA               | NA               | NA     | NA      | NA       | NA       | NA      | NA |
|                   | NA               | NA               | NA     | NA      | NA       | NA       | NA      | NA |
|                   | NA               | NA               | NA     | NA      | NA       | NA       | NA      | NA |
|                   | NA               | NA               | NA     | NA      | NA       | NA       | NA      | NA |
|                   | 0                | NA               | NA     | NA      | NA       | NA       | NA      | 0  |
|                   | 0                | NA               | NA     | NA      | NA       | NA       | NA      | NA |





|                   |                  |          |         |             |                   |         |         |    |
|-------------------|------------------|----------|---------|-------------|-------------------|---------|---------|----|
| SEMA6B            | NA               | Moffitt  | hs37d5  | 19          | 4558450           | 4558450 | +       |    |
| Frame_Shift_Ins   | INS              |          | G       | G           | GC                | novel   | none    |    |
| MOF-AM5           | NA               | 0        | 0       | 0           | 0                 | 0       | 0       |    |
| Unknown           | Untested         | Somatic  | NA      | WXS         | none              | 0       | 0       |    |
| Illumina_NextSeq  | NA               | NA       | NA      | c.20_21insG | NA                | NA      | p.S7fs  |    |
| NM_032108         | exon2            | 0        | 0       | 0           | 0                 | 0       | 0       | 0  |
|                   | NA               | NA       | NA      | NA          | NA                | NA      | NA      | NA |
|                   | NA               | NA       | NA      | NA          | NA                | NA      | NA      | NA |
|                   | NA               | NA       | NA      | NA          | NA                | NA      | NA      | NA |
|                   | NA               | NA       | NA      | NA          | NA                | NA      | NA      | NA |
|                   | 0                | NA       | NA      | NA          | NA                | NA      | NA      | 0  |
|                   | 0                | NA       | NA      | NA          | NA                | NA      | NA      | NA |
|                   | NA               | NA       | NA      | NA          | NA                | NA      | NA      | NA |
|                   | NA               | NA       | NA      | NA          | NA                | NA      | NA      | NA |
|                   | NA               | NA       | NA      | NA          | NA                | NA      | NA      | NA |
|                   | 0                |          |         |             |                   |         |         |    |
| CAMSAP3           | NA               | Moffitt  | hs37d5  | 19          | 7670328           | 7670328 | +       |    |
| Missense_Mutation |                  |          | SNP     | T           | T                 | G       | novel   |    |
| none              | MOF-MA1          | NA       | 0       | 0           | 0                 | 0       | 0       | 0  |
|                   | Unknown          | Untested | Somatic | NA          | WXS               | none    | 0       | 0  |
|                   | Illumina_NextSeq | NA       | NA      | NA          | c.T365G           | NA      | p.V122G |    |
| NM_001080429      | exon2            | 0        | 0       | 0           | 0                 | 0       | 0       | 0  |
|                   | NA               | NA       | NA      | NA          | NA                | NA      | NA      | NA |
|                   | NA               | NA       | NA      | NA          | NA                | NA      | NA      | NA |
|                   | NA               | NA       | NA      | NA          | NA                | NA      | NA      | NA |
|                   | NA               | NA       | NA      | NA          | probably_damaging |         |         | NA |
|                   | NA               | NA       | 0       | NA          | NA                | NA      | NA      | NA |
|                   | NA               | 0        | 0       | NA          | NA                | NA      | NA      | NA |
|                   | NA               | NA       | NA      | NA          | NA                | NA      | NA      | NA |
|                   | NA               | NA       | NA      | NA          | NA                | NA      | NA      | NA |
|                   | NA               | NA       | NA      | NA          | NA                | NA      | NA      | NA |
|                   | NA               | NA       | 0       |             |                   |         |         |    |
| Unknown           | NA               | Moffitt  | hs37d5  | 19          | 7696298           | 7696298 | +       | 0  |
|                   | SNP              | T        | T       | C           | novel             | none    | MOF-AM5 | NA |
|                   | 0                | 0        | 0       | 0           | 0                 | 0       | Unknown |    |
|                   | Untested         | Somatic  | NA      | WXS         | none              | 0       | 0       |    |
|                   | Illumina_NextSeq | NA       | NA      | 0           | NA                | 0       | 0       | 0  |
|                   | 0                | 0        | 0       | 0           | 0                 | 0       | NA      | NA |
|                   | NA               | NA       | NA      | NA          | NA                | NA      | NA      | NA |
|                   | NA               | NA       | NA      | NA          | NA                | NA      | NA      | NA |
|                   | NA               | NA       | NA      | NA          | NA                | NA      | NA      | NA |
|                   | NA               | NA       | NA      | NA          | NA                | NA      | 0       | NA |
|                   | NA               | NA       | NA      | NA          | NA                | 0       | 0       | NA |
|                   | NA               | NA       | NA      | NA          | NA                | NA      | NA      | NA |
|                   | NA               | NA       | NA      | NA          | NA                | NA      | NA      | NA |
|                   | NA               | NA       | NA      | NA          | NA                | NA      | NA      | NA |
|                   | NA               | NA       | NA      | NA          | NA                | NA      | 0       |    |
| Unknown           | NA               | Moffitt  | hs37d5  | 19          | 8151234           | 8151234 | +       | 0  |
|                   | SNP              | T        | T       | G           | novel             | none    | MOF-MA1 | NA |
|                   | 0                | 0        | 0       | 0           | 0                 | 0       | Unknown |    |

|                   |                  |                  |          |           |          |          |          |    |
|-------------------|------------------|------------------|----------|-----------|----------|----------|----------|----|
| Untested Somatic  | NA               | WXS              | none     | 0         | 0        |          |          |    |
| Illumina_NextSeq  | NA               | NA               | 0        | NA        | 0        | 0        | 0        | 0  |
| 0                 | 0                | 0                | 0        | 0         | 0        | 0        | NA       | NA |
| NA                | NA               | NA               | NA       | NA        | NA       | NA       | NA       | NA |
| NA                | NA               | NA               | NA       | NA        | NA       | NA       | NA       | NA |
| NA                | NA               | NA               | NA       | NA        | NA       | NA       | NA       | NA |
| NA                | NA               | NA               | NA       | NA        | NA       | NA       | 0        | NA |
| NA                | NA               | NA               | NA       | NA        | NA       | 0        | 0        | NA |
| NA                | NA               | NA               | NA       | NA        | NA       | NA       | NA       | NA |
| NA                | NA               | NA               | NA       | NA        | NA       | NA       | NA       | NA |
| NA                | NA               | NA               | NA       | NA        | NA       | NA       | NA       | NA |
| NA                | NA               | NA               | NA       | NA        | NA       | NA       | NA       | NA |
| NA                | NA               | NA               | NA       | NA        | NA       | NA       | 0        |    |
| MUC16             | NA               | Moffitt          | hs37d5   | 19        | 9061707  | 9061707  | +        |    |
| Missense_Mutation |                  |                  | SNP      | G         | G        | T        | novel    |    |
| none              | MOF-AM5          | NA               | 0        | 0         | 0        | 0        | 0        | 0  |
|                   | Unknown          | Untested Somatic | NA       | WXS       | none     | 0        | 0        | 0  |
|                   | Illumina_NextSeq | NA               | NA       | c.C25739A | NA       | NA       | NA       | NA |
| p.P8580Q          | NM_024690        | exon3            | 0        | 0         | 0        | 0        | 0        | 0  |
| 0                 | NA               | NA               | NA       | NA        | NA       | NA       | NA       | NA |
| NA                | NA               | NA               | NA       | NA        | NA       | NA       | NA       | NA |
| NA                | NA               | NA               | NA       | NA        | NA       | NA       | NA       | NA |
| NA                | NA               | NA               | NA       | NA        | NA       | NA       | NA       | NA |
| NA                | 0                | NA               | NA       | NA        | NA       | NA       | NA       | NA |
| 0                 | 0                | NA               | NA       | NA        | NA       | NA       | NA       | NA |
| NA                | NA               | NA               | NA       | NA        | NA       | NA       | NA       | NA |
| NA                | NA               | NA               | NA       | NA        | NA       | NA       | NA       | NA |
| NA                | NA               | NA               | NA       | NA        | NA       | NA       | NA       | NA |
| NA                | 0                |                  |          |           |          |          |          |    |
| MUC16             | NA               | Moffitt          | hs37d5   | 19        | 9085397  | 9085397  | +        |    |
| Missense_Mutation |                  |                  | SNP      | T         | T        | A        | novel    |    |
| none              | MOF-AM5          | NA               | 0        | 0         | 0        | 0        | 0        | 0  |
|                   | Unknown          | Untested Somatic | NA       | WXS       | none     | 0        | 0        | 0  |
|                   | Illumina_NextSeq | NA               | NA       | c.A6418T  | NA       | NA       | p.I2140F |    |
| NM_024690         | exon1            | 0                | 0        | 0         | 0        | 0        | 0        | 0  |
| NA                | NA               | NA               | NA       | NA        | NA       | NA       | NA       | NA |
| NA                | NA               | NA               | NA       | NA        | NA       | NA       | NA       | NA |
| NA                | NA               | NA               | NA       | NA        | NA       | NA       | NA       | NA |
| NA                | NA               | NA               | NA       | NA        | NA       | NA       | NA       | NA |
| 0                 | NA               | NA               | NA       | NA        | NA       | NA       | NA       | 0  |
| 0                 | NA               | NA               | NA       | NA        | NA       | NA       | NA       | NA |
| NA                | NA               | NA               | NA       | NA        | NA       | NA       | NA       | NA |
| NA                | NA               | NA               | NA       | NA        | NA       | NA       | NA       | NA |
| NA                | NA               | NA               | NA       | NA        | NA       | NA       | NA       | NA |
| 0                 |                  |                  |          |           |          |          |          |    |
| PPAN-P2RY11       | NA               | Moffitt          | hs37d5   | 19        | 10224520 | 10224520 | +        |    |
| Silent            | SNP              | C                | C        | G         | novel    | none     |          |    |
| MOF-MA1           | NA               | 0                | 0        | 0         | 0        | 0        | 0        | 0  |
| Unknown           | Untested Somatic | NA               | WXS      | none      | 0        | 0        | 0        | 0  |
| Illumina_NextSeq  | NA               | NA               | c.C1491G | NA        | p.L497L  |          |          |    |
| NM_001040664      | exon13           | 0                | 0        | 0         | 0        | 0        | 0        | 0  |





|                   |                  |          |         |          |                   |          |           |    |    |
|-------------------|------------------|----------|---------|----------|-------------------|----------|-----------|----|----|
| PODNL1            | NA               | NA       | NA      | NA       | NA                | NA       | 0         |    |    |
| Missense_Mutation | NA               | Moffitt  | hs37d5  | 19       | 14044751          | 14044751 | +         |    |    |
| none              | MOF-AM6          | NA       | 0       | 0        | 0                 | 0        | 0         | 0  | 0  |
|                   | Unknown          | Untested | Somatic | NA       | WXS               | none     | 0         | 0  | 0  |
| NM_024825         | Illumina_NextSeq | NA       | NA      | NA       | c.G728A           | NA       | p.R243H   |    |    |
|                   | exon7            | 0        | 0       | 0        | 0                 | 0        | 0         | 0  | 0  |
|                   | NA               | NA       | NA      | NA       | NA                | NA       | NA        | NA | NA |
|                   | NA               | NA       | NA      | NA       | NA                | NA       | NA        | NA | NA |
|                   | NA               | NA       | NA      | NA       | NA                | NA       | NA        | NA | NA |
|                   | NA               | NA       | NA      | NA       | probably_damaging |          |           |    | NA |
|                   | NA               | NA       | 0       | NA       | NA                | NA       | NA        | NA | NA |
|                   | NA               | 0        | 0       | NA       | NA                | NA       | NA        | NA | NA |
|                   | NA               | NA       | NA      | NA       | NA                | NA       | NA        | NA | NA |
|                   | NA               | NA       | NA      | NA       | NA                | NA       | NA        | NA | NA |
|                   | NA               | NA       | NA      | NA       | NA                | NA       | NA        | NA | NA |
|                   | NA               | NA       | 0       | NA       | NA                | NA       | NA        | NA | NA |
| PALM3             | NA               | Moffitt  | hs37d5  | 19       | 14165769          | 14165769 | +         |    |    |
| Missense_Mutation | NA               |          | SNP     | C        | C                 | T        | novel     |    |    |
| none              | MOF-MA1          | NA       | 0       | 0        | 0                 | 0        | 0         | 0  | 0  |
|                   | Unknown          | Untested | Somatic | NA       | WXS               | none     | 0         | 0  | 0  |
| NM_001145028      | Illumina_NextSeq | NA       | NA      | NA       | c.G670A           | NA       | p.G224R   |    |    |
|                   | exon6            | 0        | 0       | 0        | 0                 | 0        | 0         | 0  | 0  |
|                   | NA               | NA       | NA      | NA       | NA                | NA       | NA        | NA | NA |
|                   | NA               | NA       | NA      | NA       | NA                | NA       | NA        | NA | NA |
|                   | NA               | NA       | NA      | NA       | NA                | NA       | NA        | NA | NA |
|                   | NA               | NA       | NA      | NA       | NA                | NA       | NA        | NA | NA |
|                   | 0                | NA       | NA      | NA       | NA                | NA       | NA        | NA | 0  |
|                   | 0                | NA       | NA      | NA       | NA                | NA       | NA        | NA | NA |
|                   | NA               | NA       | NA      | NA       | NA                | NA       | NA        | NA | NA |
|                   | NA               | NA       | NA      | NA       | NA                | NA       | NA        | NA | NA |
|                   | NA               | NA       | NA      | NA       | NA                | NA       | NA        | NA | NA |
|                   | 0                |          |         |          |                   |          |           |    |    |
| NOTCH3            | NA               | Moffitt  | hs37d5  | 19       | 15272088          | 15272088 | +         |    |    |
| Silent            | SNP              | G        | G       | A        | novel             | none     | MOF-AM2   | NA |    |
|                   | 0                | 0        | 0       | 0        | 0                 | 0        | Unknown   |    |    |
| Untested Somatic  | NA               |          | WXS     | none     | 0                 | 0        |           |    |    |
| Illumina_NextSeq  | NA               | NA       | NA      | c.C6351T | NA                | p.S2117S | NM_000435 |    |    |
|                   | exon33           | 0        | 0       | 0        | 0                 | 0        | 0         | NA | NA |
|                   | NA               | NA       | NA      | NA       | NA                | NA       | NA        | NA | NA |
|                   | NA               | NA       | NA      | NA       | NA                | NA       | NA        | NA | NA |
|                   | NA               | NA       | NA      | NA       | NA                | NA       | NA        | NA | NA |
|                   | NA               | NA       | NA      | NA       | NA                | NA       | NA        | NA | 0  |
|                   | NA               | NA       | NA      | NA       | NA                | NA       | 0         | 0  | 0  |
|                   | NA               | NA       | NA      | NA       | NA                | NA       | NA        | NA | NA |
|                   | NA               | NA       | NA      | NA       | NA                | NA       | NA        | NA | NA |
|                   | NA               | NA       | NA      | NA       | NA                | NA       | NA        | NA | NA |
|                   | NA               | NA       | NA      | NA       | NA                | NA       | NA        | NA | 0  |
| KLF2              | NA               | Moffitt  | hs37d5  | 19       | 16437717          | 16437717 | +         |    |    |
| Missense_Mutation | NA               |          | SNP     | C        | C                 | T        | novel     |    |    |

|                   |                  |          |          |    |                   |          |           |    |
|-------------------|------------------|----------|----------|----|-------------------|----------|-----------|----|
| none              | MOF-AM5          | NA       | 0        | 0  | 0                 | 0        | 0         | 0  |
|                   | Unknown          | Untested | Somatic  | NA | WXS               | none     | 0         | 0  |
|                   | Illumina_NextSeq | NA       | NA       | NA | c.C943T           | NA       | p.R315C   |    |
| NM_016270         | exon3            | 0        | 0        | 0  | 0                 | 0        | 0         | 0  |
|                   | NA               | NA       | NA       | NA | NA                | NA       | NA        | NA |
|                   | NA               | NA       | NA       | NA | NA                | NA       | NA        | NA |
|                   | NA               | NA       | NA       | NA | NA                | NA       | NA        | NA |
|                   | NA               | NA       | NA       | NA | possibly_damaging |          |           | NA |
|                   | NA               | NA       | 0        | NA | NA                | NA       | NA        | NA |
|                   | NA               | 0        | 0        | NA | NA                | NA       | NA        | NA |
|                   | NA               | NA       | NA       | NA | NA                | NA       | NA        | NA |
|                   | NA               | NA       | NA       | NA | NA                | NA       | NA        | NA |
|                   | NA               | NA       | NA       | NA | NA                | NA       | NA        | NA |
|                   | NA               | NA       | 0        | NA | NA                | NA       | NA        | NA |
| CPAMD8            | NA               | Moffitt  | hs37d5   | 19 | 17091488          | 17091488 | +         |    |
| Missense_Mutation |                  |          | SNP      | T  | T                 | G        | novel     |    |
| none              | MOF-AM2          | NA       | 0        | 0  | 0                 | 0        | 0         | 0  |
|                   | Unknown          | Untested | Somatic  | NA | WXS               | none     | 0         | 0  |
|                   | Illumina_NextSeq | NA       | NA       | NA | c.A1545C          | NA       | p.E515D   |    |
| NM_015692         | exon14           | 0        | 0        | 0  | 0                 | 0        | 0         | 0  |
|                   | NA               | NA       | NA       | NA | NA                | NA       | NA        | NA |
|                   | NA               | NA       | NA       | NA | NA                | NA       | NA        | NA |
|                   | NA               | NA       | NA       | NA | NA                | NA       | NA        | NA |
|                   | NA               | NA       | NA       | NA | possibly_damaging |          |           | NA |
|                   | NA               | NA       | 0        | NA | NA                | NA       | NA        | NA |
|                   | NA               | 0        | 0        | NA | NA                | NA       | NA        | NA |
|                   | NA               | NA       | NA       | NA | NA                | NA       | NA        | NA |
|                   | NA               | NA       | NA       | NA | NA                | NA       | NA        | NA |
|                   | NA               | NA       | NA       | NA | NA                | NA       | NA        | NA |
|                   | NA               | NA       | 0        | NA | NA                | NA       | NA        | NA |
| CPAMD8            | NA               | Moffitt  | hs37d5   | 19 | 17107924          | 17107924 | +         |    |
| Silent            | SNP              | C        | C        | G  | novel             | none     | MOF-MA1   | NA |
|                   | 0                | 0        | 0        | 0  | 0                 | 0        | Unknown   |    |
| Untested Somatic  | NA               | WXS      | none     | 0  | 0                 | 0        |           |    |
| Illumina_NextSeq  | NA               | NA       | c.G1233C | NA | NA                | p.G411G  | NM_015692 |    |
|                   | exon11           | 0        | 0        | 0  | 0                 | 0        | 0         | NA |
|                   | NA               | NA       | NA       | NA | NA                | NA       | NA        | NA |
|                   | NA               | NA       | NA       | NA | NA                | NA       | NA        | NA |
|                   | NA               | NA       | NA       | NA | NA                | NA       | NA        | NA |
|                   | NA               | NA       | NA       | NA | NA                | NA       | NA        | 0  |
|                   | NA               | NA       | NA       | NA | NA                | NA       | 0         | 0  |
|                   | NA               | NA       | NA       | NA | NA                | NA       | NA        | NA |
|                   | NA               | NA       | NA       | NA | NA                | NA       | NA        | NA |
|                   | NA               | NA       | NA       | NA | NA                | NA       | NA        | NA |
|                   | NA               | NA       | NA       | NA | NA                | NA       | NA        | 0  |
| Unknown           | NA               | Moffitt  | hs37d5   | 19 | 17389956          | 17389956 | +         | 0  |
|                   | SNP              | T        | T        | C  | novel             | none     | MOF-MA1   | NA |
|                   | 0                | 0        | 0        | 0  | 0                 | 0        | Unknown   |    |
| Untested Somatic  | NA               | WXS      | none     | 0  | 0                 | 0        |           |    |
| Illumina_NextSeq  | NA               | NA       | 0        | NA | NA                | 0        | 0         | 0  |

|                   |                  |                  |          |         |          |           |           |    |
|-------------------|------------------|------------------|----------|---------|----------|-----------|-----------|----|
|                   | 0                | 0                | 0        | 0       | 0        | 0         | NA        | NA |
|                   | NA               | NA               | NA       | NA      | NA       | NA        | NA        | NA |
|                   | NA               | NA               | NA       | NA      | NA       | NA        | NA        | NA |
|                   | NA               | NA               | NA       | NA      | NA       | NA        | NA        | NA |
|                   | NA               | NA               | NA       | NA      | NA       | NA        | 0         | NA |
|                   | NA               | NA               | NA       | NA      | NA       | 0         | 0         | NA |
|                   | NA               | NA               | NA       | NA      | NA       | NA        | NA        | NA |
|                   | NA               | NA               | NA       | NA      | NA       | NA        | NA        | NA |
|                   | NA               | NA               | NA       | NA      | NA       | NA        | NA        | NA |
|                   | NA               | NA               | NA       | NA      | NA       | NA        | 0         | NA |
| Unknown           | NA               | Moffitt          | hs37d5   | 19      | 17720918 | 17720918+ |           | 0  |
|                   | SNP              | G                | G        | A       | novel    | none      | MOF-MA1   | NA |
|                   | 0                | 0                | 0        | 0       | 0        | 0         | Unknown   |    |
| Untested Somatic  | NA               | WXS              | none     | 0       | 0        |           |           |    |
| Illumina_NextSeq  | NA               | NA               | 0        | NA      | 0        | 0         | 0         | 0  |
|                   | 0                | 0                | 0        | 0       | 0        | 0         | NA        | NA |
|                   | NA               | NA               | NA       | NA      | NA       | NA        | NA        | NA |
|                   | NA               | NA               | NA       | NA      | NA       | NA        | NA        | NA |
|                   | NA               | NA               | NA       | NA      | NA       | NA        | NA        | NA |
|                   | NA               | NA               | NA       | NA      | NA       | NA        | 0         | NA |
|                   | NA               | NA               | NA       | NA      | NA       | 0         | 0         | NA |
|                   | NA               | NA               | NA       | NA      | NA       | NA        | NA        | NA |
|                   | NA               | NA               | NA       | NA      | NA       | NA        | NA        | NA |
|                   | NA               | NA               | NA       | NA      | NA       | NA        | 0         | NA |
| MAP1S             | NA               | Moffitt          | hs37d5   | 19      | 17838530 | 17838530+ |           |    |
| Silent            | SNP              | C                | C        | T       | novel    | none      | MOF-AM5   | NA |
|                   | 0                | 0                | 0        | 0       | 0        | 0         | Unknown   |    |
| Untested Somatic  | NA               | WXS              | none     | 0       | 0        |           |           |    |
| Illumina_NextSeq  | NA               | NA               | c.C2337T | NA      | NA       | p.A779A   | NM_018174 |    |
|                   | exon5            | 0                | 0        | 0       | 0        | 0         | 0         | NA |
|                   | NA               | NA               | NA       | NA      | NA       | NA        | NA        | NA |
|                   | NA               | NA               | NA       | NA      | NA       | NA        | NA        | NA |
|                   | NA               | NA               | NA       | NA      | NA       | NA        | NA        | NA |
|                   | NA               | NA               | NA       | NA      | NA       | NA        | NA        | 0  |
|                   | NA               | NA               | NA       | NA      | NA       | NA        | 0.000000  |    |
| 0.000116          | NA               | NA               | NA       | NA      | NA       | NA        | NA        | NA |
|                   | NA               | NA               | NA       | NA      | NA       | NA        | NA        | NA |
|                   | NA               | NA               | NA       | NA      | NA       | NA        | NA        | NA |
|                   | NA               | NA               | NA       | NA      | NA       | NA        | NA        | 0  |
| JUND              | NA               | Moffitt          | hs37d5   | 19      | 18391448 | 18391448+ |           |    |
| Missense_Mutation |                  | SNP              | A        | A       | T        | novel     |           |    |
| none              | MOF-MA1          | NA               | 0        | 0       | 0        | 0         | 0         | 0  |
|                   | Unknown          | Untested Somatic | NA       | WXS     | none     | 0         | 0         | 0  |
|                   | Illumina_NextSeq | NA               | NA       | c.T847A | NA       | p.S283T   |           |    |
| NM_005354         | exon1            | 0                | 0        | 0       | 0        | 0         | 0         | 0  |
|                   | NA               | NA               | NA       | NA      | NA       | NA        | NA        | NA |
|                   | NA               | NA               | NA       | NA      | NA       | NA        | NA        | NA |
|                   | NA               | NA               | NA       | NA      | NA       | NA        | NA        | NA |
|                   | NA               | NA               | NA       | NA      | benign   | NA        | NA        | NA |





|                   |                  |                  |          |         |                   |            |           |    |
|-------------------|------------------|------------------|----------|---------|-------------------|------------|-----------|----|
|                   | NA               | NA               | NA       | NA      | NA                | NA         | NA        | NA |
|                   | 0                |                  |          |         |                   |            |           |    |
| UPF1              | NA               | Moffitt          | hs37d5   | 19      | 18976530          | 18976530 + |           |    |
| Silent            | SNP              | C                | C        | T       | novel             | none       | MOF-AM2   | NA |
|                   | 0                | 0                | 0        | 0       | 0                 | 0          | Unknown   |    |
| Untested Somatic  | NA               | WXS              | none     | 0       | 0                 | 0          |           |    |
| Illumina_NextSeq  | NA               | NA               | c.C3180T | NA      | NA                | p.S1060S   | NM_002911 |    |
|                   | exon22           | 0                | 0        | 0       | 0                 | 0          | 0         | NA |
|                   | NA               | NA               | NA       | NA      | NA                | NA         | NA        | NA |
|                   | NA               | NA               | NA       | NA      | NA                | NA         | NA        | NA |
|                   | NA               | NA               | NA       | NA      | NA                | NA         | NA        | NA |
|                   | NA               | NA               | NA       | NA      | NA                | NA         | NA        | 0  |
|                   | NA               | NA               | NA       | NA      | NA                | NA         | 0         | 0  |
|                   | NA               | NA               | NA       | NA      | NA                | NA         | NA        | NA |
|                   | NA               | NA               | NA       | NA      | NA                | NA         | NA        | NA |
|                   | NA               | NA               | NA       | NA      | NA                | NA         | NA        | NA |
|                   | NA               | NA               | NA       | NA      | NA                | NA         | NA        | NA |
|                   | NA               | NA               | NA       | NA      | NA                | NA         | NA        | 0  |
| LPAR2             | NA               | Moffitt          | hs37d5   | 19      | 19737664          | 19737664 + |           |    |
| Missense_Mutation |                  |                  | SNP      | G       | G                 | C          | novel     |    |
| none              | MOF-AM5          | NA               | 0        | 0       | 0                 | 0          | 0         | 0  |
|                   | Unknown          | Untested Somatic | NA       | WXS     | none              | 0          | 0         | 0  |
|                   | Illumina_NextSeq | NA               | NA       | c.C430G | NA                | p.R144G    |           |    |
| NM_004720         | exon2            | 0                | 0        | 0       | 0                 | 0          | 0         | 0  |
|                   | NA               | NA               | NA       | NA      | NA                | NA         | NA        | NA |
|                   | NA               | NA               | NA       | NA      | NA                | NA         | NA        | NA |
|                   | NA               | NA               | NA       | NA      | NA                | NA         | NA        | NA |
|                   | NA               | NA               | NA       | NA      | benign            | NA         | NA        | NA |
|                   | 0                | NA               | NA       | NA      | NA                | NA         | NA        | 0  |
|                   | 0                | NA               | NA       | NA      | NA                | NA         | NA        | NA |
|                   | NA               | NA               | NA       | NA      | NA                | NA         | NA        | NA |
|                   | NA               | NA               | NA       | NA      | NA                | NA         | NA        | NA |
|                   | NA               | NA               | NA       | NA      | NA                | NA         | NA        | NA |
|                   | 0                |                  |          |         |                   |            |           |    |
| ZNF420            | NA               | Moffitt          | hs37d5   | 19      | 37618188          | 37618188 + |           |    |
| Nonsense_Mutation |                  |                  | SNP      | C       | C                 | T          | novel     |    |
| none              | MOF-AM2          | NA               | 0        | 0       | 0                 | 0          | 0         | 0  |
|                   | Unknown          | Untested Somatic | NA       | WXS     | none              | 0          | 0         | 0  |
|                   | Illumina_NextSeq | NA               | NA       | c.C295T | NA                | p.Q99X     |           |    |
| NM_144689         | exon5            | 0                | 0        | 0       | 0                 | 0          | 0         | 0  |
|                   | NA               | NA               | NA       | NA      | NA                | NA         | NA        | NA |
|                   | NA               | NA               | NA       | NA      | NA                | NA         | NA        | NA |
|                   | NA               | NA               | NA       | NA      | NA                | NA         | NA        | NA |
|                   | NA               | NA               | NA       | NA      | possibly_damaging | NA         | NA        | NA |
|                   | NA               | NA               | 0        | NA      | NA                | NA         | NA        | NA |
|                   | NA               | 0                | 0        | NA      | NA                | NA         | NA        | NA |
|                   | NA               | NA               | NA       | NA      | NA                | NA         | NA        | NA |
|                   | NA               | NA               | NA       | NA      | NA                | NA         | NA        | NA |
|                   | NA               | NA               | NA       | NA      | NA                | NA         | NA        | NA |
|                   | NA               | NA               | 0        |         |                   |            |           |    |
| ZNF571            | NA               | Moffitt          | hs37d5   | 19      | 38056949          | 38056949 + |           |    |

|                   |                  |                  |        |         |                   |            |           |    |
|-------------------|------------------|------------------|--------|---------|-------------------|------------|-----------|----|
| Silent            | SNP              | A                | A      | C       | novel             | none       | MOF-AM2   | NA |
|                   | 0                | 0                | 0      | 0       | 0                 | 0          | Unknown   |    |
| Untested Somatic  | NA               | NA               | WXS    | none    | 0                 | 0          |           |    |
| Illumina_NextSeq  | NA               | NA               | NA     | c.T381G | NA                | p.T127T    | NM_016536 |    |
|                   | exon4            | 0                | 0      | 0       | 0                 | 0          | 0         | NA |
|                   | NA               | NA               | NA     | NA      | NA                | NA         | NA        | NA |
|                   | NA               | NA               | NA     | NA      | NA                | NA         | NA        | NA |
|                   | NA               | NA               | NA     | NA      | NA                | NA         | NA        | 0  |
|                   | NA               | NA               | NA     | NA      | NA                | NA         | 0         | 0  |
|                   | NA               | NA               | NA     | NA      | NA                | NA         | NA        | NA |
|                   | NA               | NA               | NA     | NA      | NA                | NA         | NA        | NA |
|                   | NA               | NA               | NA     | NA      | NA                | NA         | NA        | NA |
|                   | NA               | NA               | NA     | NA      | NA                | NA         | NA        | 0  |
| ZNF540            | NA               | Moffitt          | hs37d5 | 19      | 38090608          | 38090608 + |           |    |
| Missense_Mutation |                  |                  | SNP    | T       | T                 | C          | novel     |    |
| none              | MOF-AM2          | NA               | 0      | 0       | 0                 | 0          | 0         | 0  |
|                   | Unknown          | Untested Somatic | NA     | NA      | WXS               | none       | 0         | 0  |
|                   | Illumina_NextSeq | NA               | NA     | NA      | c.T91C            | NA         | p.Y31H    |    |
| NM_152606         |                  | exon3            | 0      | 0       | 0                 | 0          | 0         | 0  |
|                   | NA               | NA               | NA     | NA      | NA                | NA         | NA        | NA |
|                   | NA               | NA               | NA     | NA      | NA                | NA         | NA        | NA |
|                   | NA               | NA               | NA     | NA      | NA                | NA         | NA        | NA |
|                   | NA               | NA               | NA     | NA      | probably_damaging |            |           | NA |
|                   | NA               | NA               | 0      | NA      | NA                | NA         | NA        | NA |
|                   | NA               | 0                | 0      | NA      | NA                | NA         | NA        | NA |
|                   | NA               | NA               | NA     | NA      | NA                | NA         | NA        | NA |
|                   | NA               | NA               | NA     | NA      | NA                | NA         | NA        | NA |
|                   | NA               | NA               | NA     | NA      | NA                | NA         | NA        | NA |
|                   | NA               | NA               | 0      | NA      | NA                | NA         | NA        | NA |
| Unknown           | NA               | Moffitt          | hs37d5 | 19      | 39370358          | 39370358 + |           | 0  |
|                   | SNP              | T                | T      | G       | novel             | none       | MOF-MA1   | NA |
|                   | 0                | 0                | 0      | 0       | 0                 | 0          | Unknown   |    |
| Untested Somatic  | NA               | NA               | WXS    | none    | 0                 | 0          |           |    |
| Illumina_NextSeq  | NA               | NA               | NA     | 0       | NA                | 0          | 0         | 0  |
|                   | 0                | 0                | 0      | 0       | 0                 | 0          | NA        | NA |
|                   | NA               | NA               | NA     | NA      | NA                | NA         | NA        | NA |
|                   | NA               | NA               | NA     | NA      | NA                | NA         | NA        | NA |
|                   | NA               | NA               | NA     | NA      | NA                | NA         | NA        | NA |
|                   | NA               | NA               | NA     | NA      | NA                | NA         | 0         | NA |
|                   | NA               | NA               | NA     | NA      | NA                | 0          | 0         | NA |
|                   | NA               | NA               | NA     | NA      | NA                | NA         | NA        | NA |
|                   | NA               | NA               | NA     | NA      | NA                | NA         | NA        | NA |
|                   | NA               | NA               | NA     | NA      | NA                | NA         | NA        | NA |
|                   | NA               | NA               | NA     | NA      | NA                | NA         | 0         |    |
| MAP3K10           | NA               | Moffitt          | hs37d5 | 19      | 40719555          | 40719555 + |           |    |
| Missense_Mutation |                  |                  | SNP    | T       | T                 | G          | novel     |    |
| none              | MOF-MA1          | NA               | 0      | 0       | 0                 | 0          | 0         | 0  |
|                   | Unknown          | Untested Somatic | NA     | NA      | WXS               | none       | 0         | 0  |
|                   | Illumina_NextSeq | NA               | NA     | NA      | c.T1969G          | NA         | p.S657A   |    |





|                   |                  |                  |          |         |                   |            |           |    |
|-------------------|------------------|------------------|----------|---------|-------------------|------------|-----------|----|
|                   | NA               | NA               | NA       | NA      | NA                | NA         | NA        | NA |
|                   | NA               | NA               | NA       | NA      | NA                | NA         | NA        | NA |
|                   | NA               | NA               | NA       | NA      | NA                | NA         | 0         |    |
| Unknown           | NA               | Moffitt          | hs37d5   | 19      | 45648563          | 45648563 + |           | 0  |
|                   | SNP              | G                | G        | A       | novel             | none       | MOF-AM5   | NA |
|                   | 0                | 0                | 0        | 0       | 0                 | 0          | Unknown   |    |
| Untested Somatic  | NA               | WXS              | none     |         | 0                 | 0          |           |    |
| Illumina_NextSeq  | NA               | NA               | 0        | NA      | 0                 | 0          | 0         | 0  |
|                   | 0                | 0                | 0        | 0       | 0                 | 0          | NA        | NA |
|                   | NA               | NA               | NA       | NA      | NA                | NA         | NA        | NA |
|                   | NA               | NA               | NA       | NA      | NA                | NA         | NA        | NA |
|                   | NA               | NA               | NA       | NA      | NA                | NA         | NA        | NA |
|                   | NA               | NA               | NA       | NA      | NA                | NA         | 0         | NA |
|                   | NA               | NA               | NA       | NA      | NA                | 0          | 0         | NA |
|                   | NA               | NA               | NA       | NA      | NA                | NA         | NA        | NA |
|                   | NA               | NA               | NA       | NA      | NA                | NA         | NA        | NA |
|                   | NA               | NA               | NA       | NA      | NA                | NA         | NA        | NA |
|                   | NA               | NA               | NA       | NA      | NA                | NA         | 0         |    |
| PTGIR             | NA               | Moffitt          | hs37d5   | 19      | 47126783          | 47126783 + |           |    |
| Missense_Mutation |                  | SNP              | C        | C       | C                 | T          | novel     |    |
| none              | MOF-AM2          | NA               | 0        | 0       | 0                 | 0          | 0         | 0  |
|                   | Unknown          | Untested Somatic | NA       | WXS     | none              | 0          | 0         | 0  |
|                   | Illumina_NextSeq | NA               | NA       | c.G700A | NA                | p.E234K    |           |    |
| NM_000960         | exon2            | 0                | 0        | 0       | 0                 | 0          | 0         | 0  |
|                   | NA               | NA               | NA       | NA      | NA                | NA         | NA        | NA |
|                   | NA               | NA               | NA       | NA      | NA                | NA         | NA        | NA |
|                   | NA               | NA               | NA       | NA      | NA                | NA         | NA        | NA |
|                   | NA               | NA               | NA       | NA      | probably_damaging |            |           | NA |
|                   | NA               | NA               | 0        | NA      | NA                | NA         | NA        | NA |
|                   | NA               | 0                | 0        | NA      | NA                | NA         | NA        | NA |
|                   | NA               | NA               | NA       | NA      | NA                | NA         | NA        | NA |
|                   | NA               | NA               | NA       | NA      | NA                | NA         | NA        | NA |
|                   | NA               | NA               | NA       | NA      | NA                | NA         | NA        | NA |
|                   | NA               | NA               | NA       | NA      | NA                | NA         | NA        | NA |
|                   | NA               | NA               | 0        |         |                   |            |           |    |
| ZC3H4             | NA               | Moffitt          | hs37d5   | 19      | 47575803          | 47575803 + |           |    |
| Silent            | SNP              | G                | G        | A       | novel             | none       | MOF-MA1   | NA |
|                   | 0                | 0                | 0        | 0       | 0                 | 0          | Unknown   |    |
| Untested Somatic  | NA               | WXS              | none     |         | 0                 | 0          |           |    |
| Illumina_NextSeq  | NA               | NA               | c.C1608T | NA      | NA                | p.P536P    | NM_015168 |    |
|                   | exon12           | 0                | 0        | 0       | 0                 | 0          | 0         | NA |
|                   | NA               | NA               | NA       | NA      | NA                | NA         | NA        | NA |
|                   | NA               | NA               | NA       | NA      | NA                | NA         | NA        | NA |
|                   | NA               | NA               | NA       | NA      | NA                | NA         | NA        | NA |
|                   | NA               | NA               | NA       | NA      | NA                | NA         | NA        | 0  |
|                   | NA               | NA               | NA       | NA      | NA                | NA         | 0         | 0  |
|                   | NA               | NA               | NA       | NA      | NA                | NA         | NA        | NA |
|                   | NA               | NA               | NA       | NA      | NA                | NA         | NA        | NA |
|                   | NA               | NA               | NA       | NA      | NA                | NA         | NA        | NA |
|                   | NA               | NA               | NA       | NA      | NA                | NA         | NA        | 0  |
| Unknown           | NA               | Moffitt          | hs37d5   | 19      | 47761655          | 47761655 + |           | 0  |

|                   |                  |                  |        |          |          |            |           |    |
|-------------------|------------------|------------------|--------|----------|----------|------------|-----------|----|
|                   | SNP              | G                | G      | A        | novel    | none       | MOF-MA1   | NA |
|                   | 0                | 0                | 0      | 0        | 0        | 0          | Unknown   |    |
| Untested Somatic  | NA               | NA               | WXS    | none     | 0        | 0          |           |    |
| Illumina_NextSeq  | NA               | NA               | NA     | 0        | NA       | 0          | 0         | 0  |
|                   | 0                | 0                | 0      | 0        | 0        | 0          | NA        | NA |
|                   | NA               | NA               | NA     | NA       | NA       | NA         | NA        | NA |
|                   | NA               | NA               | NA     | NA       | NA       | NA         | NA        | NA |
|                   | NA               | NA               | NA     | NA       | NA       | NA         | NA        | NA |
|                   | NA               | NA               | NA     | NA       | NA       | NA         | 0         | NA |
|                   | NA               | NA               | NA     | NA       | NA       | 0          | 0         | NA |
|                   | NA               | NA               | NA     | NA       | NA       | NA         | NA        | NA |
|                   | NA               | NA               | NA     | NA       | NA       | NA         | NA        | NA |
|                   | NA               | NA               | NA     | NA       | NA       | NA         | NA        | NA |
|                   | NA               | NA               | NA     | NA       | NA       | NA         | NA        | NA |
|                   | NA               | NA               | NA     | NA       | NA       | NA         | NA        | NA |
|                   | NA               | NA               | NA     | NA       | NA       | NA         | 0         |    |
| GRIN2D            | NA               | Moffitt          | hs37d5 | 19       | 48917743 | 48917743 + |           |    |
| Silent            | SNP              | G                | G      | A        | novel    | none       | MOF-MA1   | NA |
|                   | 0                | 0                | 0      | 0        | 0        | 0          | Unknown   |    |
| Untested Somatic  | NA               | NA               | WXS    | none     | 0        | 0          |           |    |
| Illumina_NextSeq  | NA               | NA               | NA     | c.G1314A | NA       | p.E438E    | NM_000836 |    |
|                   | exon5            | 0                | 0      | 0        | 0        | 0          | 0         | NA |
|                   | NA               | NA               | NA     | NA       | NA       | NA         | NA        | NA |
|                   | NA               | NA               | NA     | NA       | NA       | NA         | NA        | NA |
|                   | NA               | NA               | NA     | NA       | NA       | NA         | NA        | NA |
|                   | NA               | NA               | NA     | NA       | NA       | NA         | NA        | 0  |
|                   | NA               | NA               | NA     | NA       | NA       | NA         | 0         | 0  |
|                   | NA               | NA               | NA     | NA       | NA       | NA         | NA        | NA |
|                   | NA               | NA               | NA     | NA       | NA       | NA         | NA        | NA |
|                   | NA               | NA               | NA     | NA       | NA       | NA         | NA        | NA |
|                   | NA               | NA               | NA     | NA       | NA       | NA         | NA        | NA |
|                   | NA               | NA               | NA     | NA       | NA       | NA         | NA        | 0  |
| LMTK3             | NA               | Moffitt          | hs37d5 | 19       | 49002846 | 49002846 + |           |    |
| Missense_Mutation |                  |                  | SNP    | C        | C        | G          | novel     |    |
| none              | MOF-MA1          | NA               | 0      | 0        | 0        | 0          | 0         | 0  |
|                   | Unknown          | Untested Somatic | NA     | NA       | WXS      | none       | 0         | 0  |
|                   | Illumina_NextSeq | NA               | NA     | c.G1567C | NA       | p.A523P    |           |    |
| NM_001080434      | exon12           | 0                | 0      | 0        | 0        | 0          | 0         | 0  |
|                   | NA               | NA               | NA     | NA       | NA       | NA         | NA        | NA |
|                   | NA               | NA               | NA     | NA       | NA       | NA         | NA        | NA |
|                   | NA               | NA               | NA     | NA       | NA       | NA         | NA        | NA |
|                   | NA               | NA               | NA     | NA       | NA       | NA         | NA        | NA |
|                   | 0                | NA               | NA     | NA       | NA       | NA         | NA        | 0  |
|                   | 0                | NA               | NA     | NA       | NA       | NA         | NA        | NA |
|                   | NA               | NA               | NA     | NA       | NA       | NA         | NA        | NA |
|                   | NA               | NA               | NA     | NA       | NA       | NA         | NA        | NA |
|                   | NA               | NA               | NA     | NA       | NA       | NA         | NA        | NA |
|                   | 0                |                  |        |          |          |            |           |    |
| Unknown           | NA               | Moffitt          | hs37d5 | 19       | 49439283 | 49439283 + |           | 0  |
|                   | SNP              | C                | C      | T        | novel    | none       | MOF-MA1   | NA |
|                   | 0                | 0                | 0      | 0        | 0        | 0          | Unknown   |    |
| Untested Somatic  | NA               | NA               | WXS    | none     | 0        | 0          |           |    |
| Illumina_NextSeq  | NA               | NA               | NA     | 0        | NA       | 0          | 0         | 0  |





|                   |                  |          |         |      |                   |          |         |    |
|-------------------|------------------|----------|---------|------|-------------------|----------|---------|----|
|                   | NA               | NA       | NA      | NA   | possibly_damaging |          |         | NA |
|                   | NA               | NA       | 0       | NA   | NA                | NA       | NA      | NA |
|                   | NA               | 0        | 0       | NA   | NA                | NA       | NA      | NA |
|                   | NA               | NA       | NA      | NA   | NA                | NA       | NA      | NA |
|                   | NA               | NA       | NA      | NA   | NA                | NA       | NA      | NA |
|                   | NA               | NA       | NA      | NA   | NA                | NA       | NA      | NA |
|                   | NA               | NA       | 0       |      |                   |          |         |    |
| VSIG10L           | NA               | Moffitt  | hs37d5  | 19   | 51840579          | 51840579 | +       |    |
| Missense_Mutation |                  |          | SNP     | G    | G                 | C        | novel   |    |
| none              | MOF-AM2          | NA       | 0       | 0    | 0                 | 0        | 0       | 0  |
|                   | Unknown          | Untested | Somatic | NA   | WXS               | none     | 0       | 0  |
|                   | Illumina_NextSeq | NA       | NA      | NA   | c.C2218G          | NA       | p.R740G |    |
| NM_001163922      | exon7            | 0        | 0       | 0    | 0                 | 0        | 0       | 0  |
|                   | NA               | NA       | NA      | NA   | NA                | NA       | NA      | NA |
|                   | NA               | NA       | NA      | NA   | NA                | NA       | NA      | NA |
|                   | NA               | NA       | NA      | NA   | NA                | NA       | NA      | NA |
|                   | NA               | NA       | NA      | NA   | NA                | NA       | NA      | NA |
|                   | 0                | NA       | NA      | NA   | NA                | NA       | NA      | 0  |
|                   | 0                | NA       | NA      | NA   | NA                | NA       | NA      | NA |
|                   | NA               | NA       | NA      | NA   | NA                | NA       | NA      | NA |
|                   | NA               | NA       | NA      | NA   | NA                | NA       | NA      | NA |
|                   | NA               | NA       | NA      | NA   | NA                | NA       | NA      | NA |
|                   | 0                |          |         |      |                   |          |         |    |
| ZNF175            | NA               | Moffitt  | hs37d5  | 19   | 52090201          | 52090201 | +       |    |
| Missense_Mutation |                  |          | SNP     | A    | A                 | G        | novel   |    |
| none              | MOF-MA1          | NA       | 0       | 0    | 0                 | 0        | 0       | 0  |
|                   | Unknown          | Untested | Somatic | NA   | WXS               | none     | 0       | 0  |
|                   | Illumina_NextSeq | NA       | NA      | NA   | c.A617G           | NA       | p.K206R |    |
| NM_007147         | exon5            | 0        | 0       | 0    | 0                 | 0        | 0       | 0  |
|                   | NA               | NA       | NA      | NA   | NA                | NA       | NA      | NA |
|                   | NA               | NA       | NA      | NA   | NA                | NA       | NA      | NA |
|                   | NA               | NA       | NA      | NA   | NA                | NA       | NA      | NA |
|                   | NA               | NA       | NA      | NA   | possibly_damaging |          |         | NA |
|                   | NA               | NA       | 0       | NA   | NA                | NA       | NA      | NA |
|                   | NA               | 0        | 0       | NA   | NA                | NA       | NA      | NA |
|                   | NA               | NA       | NA      | NA   | NA                | NA       | NA      | NA |
|                   | NA               | NA       | NA      | NA   | NA                | NA       | NA      | NA |
|                   | NA               | NA       | NA      | NA   | NA                | NA       | NA      | NA |
|                   | NA               | NA       | NA      | NA   | NA                | NA       | NA      | NA |
|                   | NA               | NA       | 0       |      |                   |          |         |    |
| Unknown           | NA               | Moffitt  | hs37d5  | 19   | 52096190          | 52096190 | +       | 0  |
|                   | SNP              | T        | T       | G    | novel             | none     | MOF-AM2 | NA |
|                   | 0                | 0        | 0       | 0    | 0                 | 0        | Unknown |    |
| Untested Somatic  | NA               |          | WXS     | none | 0                 | 0        |         |    |
| Illumina_NextSeq  | NA               | NA       | NA      | 0    | NA                | 0        | 0       | 0  |
|                   | 0                | 0        | 0       | 0    | 0                 | 0        | NA      | NA |
|                   | NA               | NA       | NA      | NA   | NA                | NA       | NA      | NA |
|                   | NA               | NA       | NA      | NA   | NA                | NA       | NA      | NA |
|                   | NA               | NA       | NA      | NA   | NA                | NA       | NA      | NA |
|                   | NA               | NA       | NA      | NA   | NA                | NA       | 0       | NA |
|                   | NA               | NA       | NA      | NA   | NA                | 0        | 0       | NA |



|                   |                  |         |        |      |          |          |       |    |
|-------------------|------------------|---------|--------|------|----------|----------|-------|----|
| Unknown           | NA               | NA      | NA     | NA   | NA       | NA       | 0     |    |
| SNP               | NA               | Moffitt | hs37d5 | 19   | 59010781 | 59010781 | +     | 0  |
| 0                 | 0                | 0       | 0      | 0    | 0        | 0        | 0     | 0  |
| Untested Somatic  | NA               | NA      | WXS    | none | 0        | 0        |       |    |
| 0                 | 0                | 0       | 0      | 0    | 0        | 0        | 0     | 0  |
| NA                | NA               | NA      | NA     | NA   | NA       | NA       | NA    | NA |
| NA                | NA               | NA      | NA     | NA   | NA       | NA       | NA    | NA |
| NA                | NA               | NA      | NA     | NA   | NA       | NA       | NA    | NA |
| NA                | NA               | NA      | NA     | NA   | NA       | NA       | 0     | NA |
| NA                | NA               | NA      | NA     | NA   | NA       | 0        | 0     | NA |
| NA                | NA               | NA      | NA     | NA   | NA       | NA       | NA    | NA |
| NA                | NA               | NA      | NA     | NA   | NA       | NA       | NA    | NA |
| NA                | NA               | NA      | NA     | NA   | NA       | NA       | NA    | NA |
| NA                | NA               | NA      | NA     | NA   | NA       | NA       | 0     | NA |
| Unknown           | NA               | Moffitt | hs37d5 | 2    | 264047   | 264047   | +     | 0  |
| SNP               | NA               | C       | C      | G    | novel    | none     |       | 0  |
| 0                 | 0                | 0       | 0      | 0    | 0        | 0        | +     | 0  |
| Untested Somatic  | NA               | NA      | WXS    | none | 0        | 0        |       |    |
| 0                 | 0                | 0       | 0      | 0    | 0        | 0        | 0     | 0  |
| NA                | NA               | NA      | NA     | NA   | NA       | NA       | NA    | NA |
| NA                | NA               | NA      | NA     | NA   | NA       | NA       | NA    | NA |
| NA                | NA               | NA      | NA     | NA   | NA       | NA       | NA    | NA |
| NA                | NA               | NA      | NA     | NA   | NA       | NA       | 0     | NA |
| NA                | NA               | NA      | NA     | NA   | NA       | 0        | 0     | NA |
| NA                | NA               | NA      | NA     | NA   | NA       | NA       | NA    | NA |
| NA                | NA               | NA      | NA     | NA   | NA       | NA       | NA    | NA |
| NA                | NA               | NA      | NA     | NA   | NA       | NA       | NA    | NA |
| NA                | NA               | NA      | NA     | NA   | NA       | NA       | NA    | NA |
| NA                | NA               | NA      | NA     | NA   | NA       | NA       | 0     | NA |
| Unknown           | NA               | Moffitt | hs37d5 | 2    | 26696820 | 26696820 | +     | 0  |
| SNP               | NA               | C       | C      | T    | novel    | none     |       | 0  |
| 0                 | 0                | 0       | 0      | 0    | 0        | 0        | +     | 0  |
| Untested Somatic  | NA               | NA      | WXS    | none | 0        | 0        |       |    |
| 0                 | 0                | 0       | 0      | 0    | 0        | 0        | 0     | 0  |
| NA                | NA               | NA      | NA     | NA   | NA       | NA       | NA    | NA |
| NA                | NA               | NA      | NA     | NA   | NA       | NA       | NA    | NA |
| NA                | NA               | NA      | NA     | NA   | NA       | NA       | NA    | NA |
| NA                | NA               | NA      | NA     | NA   | NA       | NA       | 0     | NA |
| NA                | NA               | NA      | NA     | NA   | NA       | 0        | 0     | NA |
| NA                | NA               | NA      | NA     | NA   | NA       | NA       | NA    | NA |
| NA                | NA               | NA      | NA     | NA   | NA       | NA       | NA    | NA |
| NA                | NA               | NA      | NA     | NA   | NA       | NA       | NA    | NA |
| NA                | NA               | NA      | NA     | NA   | NA       | NA       | 0     | NA |
| SPAST             | NA               | Moffitt | hs37d5 | 2    | 32362232 | 32362232 | +     | 0  |
| Missense_Mutation | NA               | SNP     | C      | C    | C        | G        | novel | 0  |
| none              | NA               | 0       | 0      | 0    | 0        | 0        | 0     | 0  |
| Unknown           | Untested Somatic | NA      | NA     | NA   | WXS      | none     | 0     | 0  |

|                   |                  |                  |        |          |                   |            |         |
|-------------------|------------------|------------------|--------|----------|-------------------|------------|---------|
|                   | Illumina_NextSeq | NA               | NA     | c.C1468G | NA                | p.Q490E    |         |
| NM_014946         | exon12           | 0                | 0      | 0        | 0                 | 0          | 0       |
|                   | NA               | NA               | NA     | NA       | NA                | NA         | NA      |
|                   | NA               | NA               | NA     | NA       | NA                | NA         | NA      |
|                   | NA               | NA               | NA     | NA       | NA                | NA         | NA      |
|                   | NA               | NA               | NA     | NA       | possibly_damaging |            | NA      |
|                   | NA               | 0                | NA     | NA       | NA                | NA         | NA      |
|                   | NA               | 0                | NA     | NA       | NA                | NA         | NA      |
|                   | NA               | NA               | NA     | NA       | NA                | NA         | NA      |
|                   | NA               | NA               | NA     | NA       | NA                | NA         | NA      |
|                   | NA               | NA               | NA     | NA       | NA                | NA         | NA      |
|                   | NA               | 0                | NA     | NA       | NA                | NA         | NA      |
| Unknown           | NA               | Moffitt          | hs37d5 | 2        | 36764776          | 36764776 + | 0       |
|                   | SNP              | C                | C      | T        | novel             | none       | MOF-MA1 |
|                   | 0                | 0                | 0      | 0        | 0                 | 0          | Unknown |
| Untested Somatic  | NA               | WXS              | none   | 0        | 0                 |            |         |
| Illumina_NextSeq  | NA               | NA               | 0      | NA       | 0                 | 0          | 0       |
|                   | 0                | 0                | 0      | 0        | 0                 | 0          | NA      |
|                   | NA               | NA               | NA     | NA       | NA                | NA         | NA      |
|                   | NA               | NA               | NA     | NA       | NA                | NA         | NA      |
|                   | NA               | NA               | NA     | NA       | NA                | NA         | NA      |
|                   | NA               | NA               | NA     | NA       | NA                | NA         | 0       |
|                   | NA               | NA               | NA     | NA       | NA                | 0          | 0       |
|                   | NA               | NA               | NA     | NA       | NA                | NA         | NA      |
|                   | NA               | NA               | NA     | NA       | NA                | NA         | NA      |
|                   | NA               | NA               | NA     | NA       | NA                | NA         | NA      |
|                   | NA               | NA               | NA     | NA       | NA                | NA         | 0       |
| Unknown           | NA               | Moffitt          | hs37d5 | 2        | 39117038          | 39117038 + | 0       |
|                   | SNP              | T                | T      | C        | novel             | none       | MOF-AM2 |
|                   | 0                | 0                | 0      | 0        | 0                 | 0          | Unknown |
| Untested Somatic  | NA               | WXS              | none   | 0        | 0                 |            |         |
| Illumina_NextSeq  | NA               | NA               | 0      | NA       | 0                 | 0          | 0       |
|                   | 0                | 0                | 0      | 0        | 0                 | 0          | NA      |
|                   | NA               | NA               | NA     | NA       | NA                | NA         | NA      |
|                   | NA               | NA               | NA     | NA       | NA                | NA         | NA      |
|                   | NA               | NA               | NA     | NA       | NA                | NA         | NA      |
|                   | NA               | NA               | NA     | NA       | NA                | NA         | 0       |
|                   | NA               | NA               | NA     | NA       | NA                | 0          | 0       |
|                   | NA               | NA               | NA     | NA       | NA                | NA         | NA      |
|                   | NA               | NA               | NA     | NA       | NA                | NA         | NA      |
|                   | NA               | NA               | NA     | NA       | NA                | NA         | NA      |
|                   | NA               | NA               | NA     | NA       | NA                | NA         | 0       |
| CAMKMT            | NA               | Moffitt          | hs37d5 | 2        | 44981247          | 44981247 + |         |
| Missense_Mutation |                  | SNP              | T      | T        | C                 | novel      |         |
| none              | MOF-MA1          | NA               | 0      | 0        | 0                 | 0          | 0       |
|                   | Unknown          | Untested Somatic | NA     | WXS      | none              | 0          | 0       |
|                   | Illumina_NextSeq | NA               | NA     | c.T752C  | NA                | p.L251P    |         |
| NM_024766         | exon9            | 0                | 0      | 0        | 0                 | 0          | 0       |
|                   | NA               | NA               | NA     | NA       | NA                | NA         | NA      |
|                   | NA               | NA               | NA     | NA       | NA                | NA         | NA      |

|                   |                  |                  |        |         |                   |            |         |    |
|-------------------|------------------|------------------|--------|---------|-------------------|------------|---------|----|
|                   | NA               | NA               | NA     | NA      | NA                | NA         | NA      | NA |
|                   | NA               | NA               | NA     | NA      | probably_damaging |            |         | NA |
|                   | NA               | NA               | 0      | NA      | NA                | NA         | NA      | NA |
|                   | NA               | 0                | 0      | NA      | NA                | NA         | NA      | NA |
|                   | NA               | NA               | NA     | NA      | NA                | NA         | NA      | NA |
|                   | NA               | NA               | NA     | NA      | NA                | NA         | NA      | NA |
|                   | NA               | NA               | NA     | NA      | NA                | NA         | NA      | NA |
|                   | NA               | NA               | 0      |         |                   |            |         |    |
| Unknown           | NA               | Moffitt          | hs37d5 | 2       | 61552460          | 61552460 + |         | 0  |
|                   | SNP              | C                | C      | G       | novel             | none       | MOF-MA1 | NA |
|                   | 0                | 0                | 0      | 0       | 0                 | 0          | Unknown |    |
| Untested Somatic  | NA               | WXS              | none   |         | 0                 | 0          |         |    |
| Illumina_NextSeq  | NA               | NA               | 0      | NA      | 0                 | 0          | 0       | 0  |
|                   | 0                | 0                | 0      | 0       | 0                 | 0          | NA      | NA |
|                   | NA               | NA               | NA     | NA      | NA                | NA         | NA      | NA |
|                   | NA               | NA               | NA     | NA      | NA                | NA         | NA      | NA |
|                   | NA               | NA               | NA     | NA      | NA                | NA         | NA      | NA |
|                   | NA               | NA               | NA     | NA      | NA                | NA         | 0       | NA |
|                   | NA               | NA               | NA     | NA      | NA                | 0          | 0       | NA |
|                   | NA               | NA               | NA     | NA      | NA                | NA         | NA      | NA |
|                   | NA               | NA               | NA     | NA      | NA                | NA         | NA      | NA |
|                   | NA               | NA               | NA     | NA      | NA                | NA         | NA      | NA |
|                   | NA               | NA               | NA     | NA      | NA                | NA         | 0       |    |
| WDPCP             | NA               | Moffitt          | hs37d5 | 2       | 63719992          | 63719992 + |         |    |
| Missense_Mutation |                  |                  | SNP    | G       | G                 | A          | novel   |    |
| none              | MOF-MA1          | NA               | 0      | 0       | 0                 | 0          | 0       | 0  |
|                   | Unknown          | Untested Somatic | NA     | WXS     | none              | 0          | 0       | 0  |
|                   | Illumina_NextSeq | NA               | NA     | c.C158T | NA                | p.A53V     |         |    |
| NM_015910         | exon2            | 0                | 0      | 0       | 0                 | 0          | 0       | 0  |
|                   | NA               | NA               | NA     | NA      | NA                | NA         | NA      | NA |
|                   | NA               | NA               | NA     | NA      | NA                | NA         | NA      | NA |
|                   | NA               | NA               | NA     | NA      | NA                | NA         | NA      | NA |
|                   | NA               | NA               | NA     | NA      | benign            | NA         | NA      | NA |
|                   | 0.0005           | NA               | NA     | NA      | NA                | NA         | NA      | 0  |
|                   | 0                | NA               | NA     | NA      | NA                | NA         | NA      | NA |
|                   | NA               | NA               | NA     | NA      | NA                | NA         | NA      | NA |
|                   | NA               | NA               | NA     | NA      | NA                | NA         | NA      | NA |
|                   | NA               | NA               | NA     | NA      | NA                | NA         | NA      | NA |
|                   | 1                |                  |        |         |                   |            |         |    |
| Unknown           | NA               | Moffitt          | hs37d5 | 2       | 64082634          | 64082634 + |         | 0  |
|                   | SNP              | T                | T      | G       | novel             | none       | MOF-MA1 | NA |
|                   | 0                | 0                | 0      | 0       | 0                 | 0          | Unknown |    |
| Untested Somatic  | NA               | WXS              | none   |         | 0                 | 0          |         |    |
| Illumina_NextSeq  | NA               | NA               | 0      | NA      | 0                 | 0          | 0       | 0  |
|                   | 0                | 0                | 0      | 0       | 0                 | 0          | NA      | NA |
|                   | NA               | NA               | NA     | NA      | NA                | NA         | NA      | NA |
|                   | NA               | NA               | NA     | NA      | NA                | NA         | NA      | NA |
|                   | NA               | NA               | NA     | NA      | NA                | NA         | NA      | NA |
|                   | NA               | NA               | NA     | NA      | NA                | NA         | 0       | NA |
|                   | NA               | NA               | NA     | NA      | NA                | 0          | 0       | NA |



|                   |                  |                  |        |         |                   |            |         |    |
|-------------------|------------------|------------------|--------|---------|-------------------|------------|---------|----|
| Unknown           | NA               | Moffitt          | hs37d5 | 2       | 74230314          | 74230314 + | 0       |    |
|                   | SNP              | C                | C      | T       | novel             | none       | MOF-AM2 | NA |
|                   | 0                | 0                | 0      | 0       | 0                 | 0          | Unknown |    |
| Untested Somatic  | NA               | WXS              | none   | 0       | 0                 | 0          |         |    |
| Illumina_NextSeq  | NA               | NA               | 0      | NA      | 0                 | 0          | 0       | 0  |
|                   | 0                | 0                | 0      | 0       | 0                 | 0          | NA      | NA |
|                   | NA               | NA               | NA     | NA      | NA                | NA         | NA      | NA |
|                   | NA               | NA               | NA     | NA      | NA                | NA         | NA      | NA |
|                   | NA               | NA               | NA     | NA      | NA                | NA         | NA      | NA |
|                   | NA               | NA               | NA     | NA      | NA                | NA         | 0       | NA |
|                   | NA               | NA               | NA     | NA      | NA                | 0          | 0       | NA |
|                   | NA               | NA               | NA     | NA      | NA                | NA         | NA      | NA |
|                   | NA               | NA               | NA     | NA      | NA                | NA         | NA      | NA |
|                   | NA               | NA               | NA     | NA      | NA                | NA         | NA      | NA |
|                   | NA               | NA               | NA     | NA      | NA                | NA         | NA      | NA |
|                   | NA               | NA               | NA     | NA      | NA                | NA         | 0       |    |
| MOGS              | NA               | Moffitt          | hs37d5 | 2       | 74690444          | 74690444 + |         |    |
| Missense_Mutation |                  | SNP              | G      | G       | C                 | novel      |         |    |
| none              | MOF-AM2          | NA               | 0      | 0       | 0                 | 0          | 0       | 0  |
|                   | Unknown          | Untested Somatic | NA     | WXS     | none              | 0          | 0       | 0  |
|                   | Illumina_NextSeq | NA               | NA     | c.C649G | NA                | p.L217V    |         |    |
| NM_006302         | exon3            | 0                | 0      | 0       | 0                 | 0          | 0       | 0  |
|                   | NA               | NA               | NA     | NA      | NA                | NA         | NA      | NA |
|                   | NA               | NA               | NA     | NA      | NA                | NA         | NA      | NA |
|                   | NA               | NA               | NA     | NA      | NA                | NA         | NA      | NA |
|                   | NA               | NA               | NA     | NA      | probably_damaging |            |         | NA |
|                   | NA               | NA               | 0      | NA      | NA                | NA         | NA      | NA |
|                   | NA               | 0                | 0      | NA      | NA                | NA         | NA      | NA |
|                   | NA               | NA               | NA     | NA      | NA                | NA         | NA      | NA |
|                   | NA               | NA               | NA     | NA      | NA                | NA         | NA      | NA |
|                   | NA               | NA               | NA     | NA      | NA                | NA         | NA      | NA |
|                   | NA               | NA               | NA     | NA      | NA                | NA         | NA      | NA |
|                   | NA               | NA               | 0      | NA      | NA                | NA         | NA      | NA |
| Unknown           | NA               | Moffitt          | hs37d5 | 2       | 85625139          | 85625139 + | 0       |    |
|                   | SNP              | G                | G      | A       | novel             | none       | MOF-MA1 | NA |
|                   | 0                | 0                | 0      | 0       | 0                 | 0          | Unknown |    |
| Untested Somatic  | NA               | WXS              | none   | 0       | 0                 | 0          |         |    |
| Illumina_NextSeq  | NA               | NA               | 0      | NA      | 0                 | 0          | 0       | 0  |
|                   | 0                | 0                | 0      | 0       | 0                 | 0          | NA      | NA |
|                   | NA               | NA               | NA     | NA      | NA                | NA         | NA      | NA |
|                   | NA               | NA               | NA     | NA      | NA                | NA         | NA      | NA |
|                   | NA               | NA               | NA     | NA      | NA                | NA         | NA      | NA |
|                   | NA               | NA               | NA     | NA      | NA                | NA         | 0       | NA |
|                   | NA               | NA               | NA     | NA      | NA                | 0          | 0       | NA |
|                   | NA               | NA               | NA     | NA      | NA                | NA         | NA      | NA |
|                   | NA               | NA               | NA     | NA      | NA                | NA         | NA      | NA |
|                   | NA               | NA               | NA     | NA      | NA                | NA         | NA      | NA |
|                   | NA               | NA               | NA     | NA      | NA                | NA         | NA      | NA |
|                   | NA               | NA               | NA     | NA      | NA                | NA         | 0       |    |
| Unknown           | NA               | Moffitt          | hs37d5 | 2       | 86422530          | 86422530 + | 0       |    |
|                   | SNP              | G                | G      | A       | novel             | none       | MOF-MA1 | NA |
|                   | 0                | 0                | 0      | 0       | 0                 | 0          | Unknown |    |
| Untested Somatic  | NA               | WXS              | none   | 0       | 0                 | 0          |         |    |





|                   |         |                   |                  |         |           |             |           |    |
|-------------------|---------|-------------------|------------------|---------|-----------|-------------|-----------|----|
|                   | NA      | NA                | NA               | NA      | NA        | NA          | NA        | 0  |
|                   | NA      | NA                | NA               | NA      | NA        | NA          | 0         | 0  |
|                   | NA      | NA                | NA               | NA      | NA        | NA          | NA        | NA |
|                   | NA      | NA                | NA               | NA      | NA        | NA          | NA        | NA |
|                   | NA      | NA                | NA               | NA      | NA        | NA          | NA        | NA |
|                   | NA      | NA                | NA               | NA      | NA        | NA          | NA        | 0  |
| CREG2             | NA      | Moffitt           | hs37d5           | 2       | 102003886 |             | 102003886 |    |
|                   | +       | Frame_Shift_Ins   | INS              |         | G         | G           | GC        |    |
| novel             | none    | MOF-MA1           | NA               | 0       | 0         | 0           | 0         | 0  |
|                   | 0       | Unknown           | Untested         | Somatic | NA        | WXS         | none      | 0  |
|                   | 0       | Illumina_NextSeq  | NA               | NA      | NA        | c.34_35insG |           | NA |
|                   | p.P12fs | NM_153836         | exon1            |         | 0         | 0           | 0         | 0  |
|                   | 0       | 0                 | NA               | NA      | NA        | NA          | NA        | NA |
|                   | NA      | NA                | NA               | NA      | NA        | NA          | NA        | NA |
|                   | NA      | NA                | NA               | NA      | NA        | NA          | NA        | NA |
|                   | NA      | NA                | NA               | NA      | NA        | NA          | NA        | NA |
|                   | NA      | NA                | 0                | NA      | NA        | NA          | NA        | NA |
|                   | NA      | 0                 | 0                | NA      | NA        | NA          | NA        | NA |
|                   | NA      | NA                | NA               | NA      | NA        | NA          | NA        | NA |
|                   | NA      | NA                | NA               | NA      | NA        | NA          | NA        | NA |
|                   | NA      | NA                | NA               | NA      | NA        | NA          | NA        | NA |
|                   | NA      | NA                | 0                |         |           |             |           |    |
| CREG2             | NA      | Moffitt           | hs37d5           | 2       | 102003889 |             | 102003889 |    |
|                   | +       | Missense_Mutation |                  |         | SNP       | G           | G         | C  |
| novel             | none    | MOF-MA1           | NA               | 0       | 0         | 0           | 0         | 0  |
|                   | 0       | Unknown           | Untested         | Somatic | NA        | WXS         |           |    |
| none              | 0       | 0                 | Illumina_NextSeq | NA      | NA        | c.C31G      |           | NA |
|                   | p.R11G  | NM_153836         | exon1            |         | 0         | 0           | 0         | 0  |
|                   | 0       | 0                 | NA               | NA      | NA        | NA          | NA        | NA |
|                   | NA      | NA                | NA               | NA      | NA        | NA          | NA        | NA |
|                   | NA      | NA                | NA               | NA      | NA        | NA          | NA        | NA |
|                   | NA      | NA                | NA               | NA      | NA        | NA          | NA        | NA |
| possibly_damaging |         |                   | NA               | NA      | NA        | 0           | NA        | NA |
|                   | NA      | NA                | NA               | NA      | 0         | 0           | NA        | NA |
|                   | NA      | NA                | NA               | NA      | NA        | NA          | NA        | NA |
|                   | NA      | NA                | NA               | NA      | NA        | NA          | NA        | NA |
|                   | NA      | NA                | NA               | NA      | NA        | NA          | NA        | NA |
|                   | NA      | NA                | NA               | NA      | NA        | 0           |           |    |
| POU3F3            | NA      | Moffitt           | hs37d5           | 2       | 105472764 |             | 105472764 |    |
|                   | +       | Missense_Mutation |                  |         | SNP       | G           | G         | C  |
| novel             | none    | MOF-MA1           | NA               | 0       | 0         | 0           | 0         | 0  |
|                   | 0       | Unknown           | Untested         | Somatic | NA        | WXS         |           |    |
| none              | 0       | 0                 | Illumina_NextSeq | NA      | NA        | c.G796C     |           | NA |
|                   | p.E266Q | NM_006236         | exon1            |         | 0         | 0           | 0         | 0  |
|                   | 0       | 0                 | NA               | NA      | NA        | NA          | NA        | NA |
|                   | NA      | NA                | NA               | NA      | NA        | NA          | NA        | NA |
|                   | NA      | NA                | NA               | NA      | NA        | NA          | NA        | NA |
|                   | NA      | NA                | NA               | NA      | NA        | NA          | NA        | NA |
| possibly_damaging |         |                   | NA               | NA      | NA        | 0           | NA        | NA |
|                   | NA      | NA                | NA               | NA      | 0         | 0           | NA        | NA |



|                   |                  |                   |                  |          |           |      |           |    |
|-------------------|------------------|-------------------|------------------|----------|-----------|------|-----------|----|
|                   | NA               | NA                | 0                |          |           |      |           |    |
| POLR1B            | NA               | Moffitt           | hs37d5           | 2        | 113333058 |      | 113333058 |    |
|                   | +                | Missense_Mutation |                  |          | SNP       | C    | C         | T  |
|                   | novel            | none              | MOF-MA1          | NA       | 0         | 0    | 0         | 0  |
|                   | 0                | 0                 | Unknown          | Untested | Somatic   | NA   | WXS       |    |
| none              | 0                | 0                 | Illumina_NextSeq | NA       | NA        | NA   | c.C3160T  | NA |
|                   | p.L1054F         | NM_019014         |                  | exon15   | 0         | 0    | 0         | 0  |
|                   | 0                | 0                 | NA               | NA       | NA        | NA   | NA        | NA |
|                   | NA               | NA                | NA               | NA       | NA        | NA   | NA        | NA |
|                   | NA               | NA                | NA               | NA       | NA        | NA   | NA        | NA |
|                   | NA               | NA                | NA               | NA       | NA        | NA   | NA        | NA |
| probably_damaging |                  |                   | NA               | NA       | NA        | 0    | NA        | NA |
|                   | NA               | NA                | NA               | NA       | 0         | 0    | NA        | NA |
|                   | NA               | NA                | NA               | NA       | NA        | NA   | NA        | NA |
|                   | NA               | NA                | NA               | NA       | NA        | NA   | NA        | NA |
|                   | NA               | NA                | NA               | NA       | NA        | NA   | NA        | NA |
|                   | NA               | NA                | NA               | NA       | NA        | 0    |           |    |
| ACTR3             | NA               | Moffitt           | hs37d5           | 2        | 114697613 |      | 114697613 |    |
|                   | +                | Silent            | SNP              | A        | A         | G    | novel     |    |
| none              | MOF-AM5          | NA                | 0                | 0        | 0         | 0    | 0         | 0  |
|                   | Unknown          | Untested          | Somatic          | NA       | WXS       | none | 0         | 0  |
|                   | Illumina_NextSeq | NA                | NA               | NA       | c.A618G   | NA   | p.Q206Q   |    |
| NM_005721         |                  | exon7             | 0                | 0        | 0         | 0    | 0         | 0  |
|                   | NA               | NA                | NA               | NA       | NA        | NA   | NA        | NA |
|                   | NA               | NA                | NA               | NA       | NA        | NA   | NA        | NA |
|                   | NA               | NA                | NA               | NA       | NA        | NA   | NA        | NA |
|                   | NA               | NA                | NA               | NA       | NA        | NA   | NA        | NA |
|                   | 0                | NA                | NA               | NA       | NA        | NA   | NA        | 0  |
|                   | 0                | NA                | NA               | NA       | NA        | NA   | NA        | NA |
|                   | NA               | NA                | NA               | NA       | NA        | NA   | NA        | NA |
|                   | NA               | NA                | NA               | NA       | NA        | NA   | NA        | NA |
|                   | NA               | NA                | NA               | NA       | NA        | NA   | NA        | NA |
| Unknown           | NA               | Moffitt           | hs37d5           | 2        | 119739295 |      | 119739295 |    |
|                   | +                | 0                 | SNP              | G        | G         | A    | novel     |    |
| none              | MOF-AM2          | NA                | 0                | 0        | 0         | 0    | 0         | 0  |
|                   | Unknown          | Untested          | Somatic          | NA       | WXS       | none | 0         | 0  |
|                   | Illumina_NextSeq | NA                | NA               | NA       | 0         | NA   | 0         | 0  |
|                   | 0                | 0                 | 0                | 0        | 0         | 0    | 0         | NA |
|                   | NA               | NA                | NA               | NA       | NA        | NA   | NA        | NA |
|                   | NA               | NA                | NA               | NA       | NA        | NA   | NA        | NA |
|                   | NA               | NA                | NA               | NA       | NA        | NA   | NA        | NA |
|                   | NA               | NA                | NA               | NA       | NA        | NA   | NA        | 0  |
|                   | NA               | NA                | NA               | NA       | NA        | NA   | 0         | 0  |
|                   | NA               | NA                | NA               | NA       | NA        | NA   | NA        | NA |
|                   | NA               | NA                | NA               | NA       | NA        | NA   | NA        | NA |
|                   | NA               | NA                | NA               | NA       | NA        | NA   | NA        | NA |
|                   | NA               | NA                | NA               | NA       | NA        | NA   | NA        | 0  |
| Unknown           | NA               | Moffitt           | hs37d5           | 2        | 128351092 |      | 128351092 |    |
|                   | +                | 0                 | SNP              | C        | C         | T    | novel     |    |







|         |                  |                   |                  |          |           |      |           |    |
|---------|------------------|-------------------|------------------|----------|-----------|------|-----------|----|
|         | NA               | NA                | NA               | NA       | NA        | NA   | NA        | 0  |
| ITGA6   | NA               | Moffitt           | hs37d5           | 2        | 173368883 |      | 173368883 |    |
|         | +                | Missense_Mutation |                  |          | SNP       | G    | G         | A  |
|         | novel            | none              | MOF-AM2          | NA       | 0         | 0    | 0         | 0  |
|         | 0                | 0                 | Unknown          | Untested | Somatic   | NA   | WXS       |    |
| none    | 0                | 0                 | Illumina_NextSeq | NA       | NA        | NA   | c.G3179A  | NA |
|         | p.R1060Q         | NM_001079818      | exon25           | 0        | 0         | 0    | 0         | 0  |
|         | 0                | 0                 | NA               | NA       | NA        | NA   | NA        | NA |
|         | NA               | NA                | NA               | NA       | NA        | NA   | NA        | NA |
|         | NA               | NA                | NA               | NA       | NA        | NA   | NA        | NA |
|         | NA               | NA                | NA               | NA       | NA        | NA   | NA        | NA |
|         | NA               | NA                | 0                | NA       | NA        | NA   | NA        | NA |
|         | NA               | 0.000000          | 0.000244         | NA       | NA        | NA   | NA        | NA |
|         | NA               | NA                | NA               | NA       | NA        | NA   | NA        | NA |
|         | NA               | NA                | NA               | NA       | NA        | NA   | NA        | NA |
|         | NA               | NA                | NA               | NA       | NA        | NA   | NA        | NA |
|         | NA               | NA                | 0                |          |           |      |           |    |
| Unknown | NA               | Moffitt           | hs37d5           | 2        | 179318384 |      | 179318384 |    |
|         | +                | 0                 | SNP              | C        | C         | T    | novel     |    |
| none    | MOF-AM5          | NA                | 0                | 0        | 0         | 0    | 0         | 0  |
|         | Unknown          | Untested          | Somatic          | NA       | WXS       | none | 0         | 0  |
|         | Illumina_NextSeq | NA                | NA               | NA       | 0         | NA   | 0         | 0  |
|         | 0                | 0                 | 0                | 0        | 0         | 0    | 0         | NA |
|         | NA               | NA                | NA               | NA       | NA        | NA   | NA        | NA |
|         | NA               | NA                | NA               | NA       | NA        | NA   | NA        | NA |
|         | NA               | NA                | NA               | NA       | NA        | NA   | NA        | NA |
|         | NA               | NA                | NA               | NA       | NA        | NA   | NA        | 0  |
|         | NA               | NA                | NA               | NA       | NA        | NA   | 0         | 0  |
|         | NA               | NA                | NA               | NA       | NA        | NA   | NA        | NA |
|         | NA               | NA                | NA               | NA       | NA        | NA   | NA        | NA |
|         | NA               | NA                | NA               | NA       | NA        | NA   | NA        | NA |
|         | NA               | NA                | NA               | NA       | NA        | NA   | NA        | NA |
|         | NA               | NA                | NA               | NA       | NA        | NA   | NA        | 0  |
| Unknown | NA               | Moffitt           | hs37d5           | 2        | 179487442 |      | 179487442 |    |
|         | +                | 0                 | SNP              | T        | T         | G    | novel     |    |
| none    | MOF-AM2          | NA                | 0                | 0        | 0         | 0    | 0         | 0  |
|         | Unknown          | Untested          | Somatic          | NA       | WXS       | none | 0         | 0  |
|         | Illumina_NextSeq | NA                | NA               | NA       | 0         | NA   | 0         | 0  |
|         | 0                | 0                 | 0                | 0        | 0         | 0    | 0         | NA |
|         | NA               | NA                | NA               | NA       | NA        | NA   | NA        | NA |
|         | NA               | NA                | NA               | NA       | NA        | NA   | NA        | NA |
|         | NA               | NA                | NA               | NA       | NA        | NA   | NA        | NA |
|         | NA               | NA                | NA               | NA       | NA        | NA   | NA        | 0  |
|         | NA               | NA                | NA               | NA       | NA        | NA   | 0         | 0  |
|         | NA               | NA                | NA               | NA       | NA        | NA   | NA        | NA |
|         | NA               | NA                | NA               | NA       | NA        | NA   | NA        | NA |
|         | NA               | NA                | NA               | NA       | NA        | NA   | NA        | NA |
|         | NA               | NA                | NA               | NA       | NA        | NA   | NA        | 0  |
| CCDC141 | NA               | Moffitt           | hs37d5           | 2        | 179721095 |      | 179721095 |    |
|         | +                | Silent            | SNP              | C        | C         | T    | novel     |    |
| none    | MOF-MA1          | NA                | 0                | 0        | 0         | 0    | 0         | 0  |

|           |                  |                   |                  |          |                   |      |           |    |
|-----------|------------------|-------------------|------------------|----------|-------------------|------|-----------|----|
|           | Unknown          | Untested          | Somatic          | NA       | WXS               | none | 0         | 0  |
|           | Illumina_NextSeq | NA                | NA               | NA       | c.G2754A          | NA   | p.K918K   |    |
| NM_173648 | exon18           | 0                 | 0                | 0        | 0                 | 0    | 0         | 0  |
|           | NA               | NA                | NA               | NA       | NA                | NA   | NA        | NA |
|           | NA               | NA                | NA               | NA       | NA                | NA   | NA        | NA |
|           | NA               | NA                | NA               | NA       | NA                | NA   | NA        | NA |
|           | NA               | NA                | NA               | NA       | NA                | NA   | NA        | NA |
|           | 0                | NA                | NA               | NA       | NA                | NA   | NA        | 0  |
|           | 0                | NA                | NA               | NA       | NA                | NA   | NA        | NA |
|           | NA               | NA                | NA               | NA       | NA                | NA   | NA        | NA |
|           | NA               | NA                | NA               | NA       | NA                | NA   | NA        | NA |
|           | NA               | NA                | NA               | NA       | NA                | NA   | NA        | NA |
|           | 0                |                   |                  |          |                   |      |           |    |
| NEUR0D1   | NA               | Moffitt           | hs37d5           | 2        | 182543329         |      | 182543329 |    |
|           | +                | Silent            | SNP              | T        | T                 | C    | novel     |    |
| none      | MOF-AM2          | NA                | 0                | 0        | 0                 | 0    | 0         | 0  |
|           | Unknown          | Untested          | Somatic          | NA       | WXS               | none | 0         | 0  |
|           | Illumina_NextSeq | NA                | NA               | NA       | c.G259G           | NA   | p.A87A    |    |
| NM_002500 | exon2            | 0                 | 0                | 0        | 0                 | 0    | 0         | 0  |
|           | NA               | NA                | NA               | NA       | NA                | NA   | NA        | NA |
|           | NA               | NA                | NA               | NA       | NA                | NA   | NA        | NA |
|           | NA               | NA                | NA               | NA       | NA                | NA   | NA        | NA |
|           | NA               | NA                | NA               | NA       | possibly_damaging |      |           | NA |
|           | NA               | NA                | 0                | NA       | NA                | NA   | NA        | NA |
|           | NA               | 0                 | 0                | NA       | NA                | NA   | NA        | NA |
|           | NA               | NA                | NA               | NA       | NA                | NA   | NA        | NA |
|           | NA               | NA                | NA               | NA       | NA                | NA   | NA        | NA |
|           | NA               | NA                | NA               | NA       | NA                | NA   | NA        | NA |
|           | NA               | NA                | 0                |          |                   |      |           |    |
| Unknown   | NA               | Moffitt           | hs37d5           | 2        | 207413168         |      | 207413168 |    |
|           | +                | 0                 | SNP              | A        | A                 | T    | novel     |    |
| none      | MOF-AM5          | NA                | 0                | 0        | 0                 | 0    | 0         | 0  |
|           | Unknown          | Untested          | Somatic          | NA       | WXS               | none | 0         | 0  |
|           | Illumina_NextSeq | NA                | NA               | NA       | 0                 | NA   | 0         | 0  |
|           | 0                | 0                 | 0                | 0        | 0                 | 0    | 0         | NA |
|           | NA               | NA                | NA               | NA       | NA                | NA   | NA        | NA |
|           | NA               | NA                | NA               | NA       | NA                | NA   | NA        | NA |
|           | NA               | NA                | NA               | NA       | NA                | NA   | NA        | NA |
|           | NA               | NA                | NA               | NA       | NA                | NA   | NA        | 0  |
|           | NA               | NA                | NA               | NA       | NA                | NA   | 0         | 0  |
|           | NA               | NA                | NA               | NA       | NA                | NA   | NA        | NA |
|           | NA               | NA                | NA               | NA       | NA                | NA   | NA        | NA |
|           | NA               | NA                | NA               | NA       | NA                | NA   | NA        | NA |
|           | NA               | NA                | NA               | NA       | NA                | NA   | NA        | 0  |
| BARD1     | NA               | Moffitt           | hs37d5           | 2        | 215617275         |      | 215617275 |    |
|           | +                | Missense_Mutation |                  |          | SNP               | T    | T         | C  |
|           | novel            | none              | MOF-MA1          | NA       | 0                 | 0    | 0         | 0  |
|           | 0                | 0                 | Unknown          | Untested | Somatic           | NA   | WXS       |    |
| none      | 0                | 0                 | Illumina_NextSeq | NA       | NA                | NA   | c.A1573G  | NA |
|           | p.I525V          | NM_000465         | exon7            | 0        | 0                 | 0    | 0         | 0  |







|                   |                  |          |         |    |           |         |           |    |
|-------------------|------------------|----------|---------|----|-----------|---------|-----------|----|
|                   | NA               | NA       | NA      | NA | NA        | NA      | NA        | NA |
|                   | NA               | NA       | NA      | NA | NA        | NA      | NA        | NA |
|                   | NA               | NA       | NA      | NA | NA        | NA      | NA        | 0  |
| Unknown           | NA               | Moffitt  | hs37d5  | 2  | 240922889 |         | 240922889 |    |
|                   | +                | 0        | SNP     | G  | G         | A       | novel     |    |
| none              | MOF-AM6          | NA       | 0       | 0  | 0         | 0       | 0         | 0  |
|                   | Unknown          | Untested | Somatic | NA | WXS       | none    | 0         | 0  |
|                   | Illumina_NextSeq | NA       | NA      | NA | 0         | NA      | 0         | 0  |
|                   | 0                | 0        | 0       | 0  | 0         | 0       | 0         | NA |
|                   | NA               | NA       | NA      | NA | NA        | NA      | NA        | NA |
|                   | NA               | NA       | NA      | NA | NA        | NA      | NA        | NA |
|                   | NA               | NA       | NA      | NA | NA        | NA      | NA        | NA |
|                   | NA               | NA       | NA      | NA | NA        | NA      | NA        | 0  |
|                   | NA               | NA       | NA      | NA | NA        | NA      | 0         | 0  |
|                   | NA               | NA       | NA      | NA | NA        | NA      | NA        | NA |
|                   | NA               | NA       | NA      | NA | NA        | NA      | NA        | NA |
|                   | NA               | NA       | NA      | NA | NA        | NA      | NA        | NA |
|                   | NA               | NA       | NA      | NA | NA        | NA      | NA        | 0  |
| Unknown           | NA               | Moffitt  | hs37d5  | 2  | 242046200 |         | 242046200 |    |
|                   | +                | 0        | SNP     | C  | C         | A       | novel     |    |
| none              | MOF-AM5          | NA       | 0       | 0  | 0         | 0       | 0         | 0  |
|                   | Unknown          | Untested | Somatic | NA | WXS       | none    | 0         | 0  |
|                   | Illumina_NextSeq | NA       | NA      | NA | 0         | NA      | 0         | 0  |
|                   | 0                | 0        | 0       | 0  | 0         | 0       | 0         | NA |
|                   | NA               | NA       | NA      | NA | NA        | NA      | NA        | NA |
|                   | NA               | NA       | NA      | NA | NA        | NA      | NA        | NA |
|                   | NA               | NA       | NA      | NA | NA        | NA      | NA        | NA |
|                   | NA               | NA       | NA      | NA | NA        | NA      | NA        | NA |
|                   | NA               | NA       | NA      | NA | NA        | NA      | NA        | 0  |
|                   | NA               | NA       | NA      | NA | NA        | NA      | 0         | 0  |
|                   | NA               | NA       | NA      | NA | NA        | NA      | NA        | NA |
|                   | NA               | NA       | NA      | NA | NA        | NA      | NA        | NA |
|                   | NA               | NA       | NA      | NA | NA        | NA      | NA        | NA |
|                   | NA               | NA       | NA      | NA | NA        | NA      | NA        | 0  |
| TGM3              | NA               | Moffitt  | hs37d5  | 20 | 2298062   | 2298062 | +         |    |
| Missense_Mutation |                  |          | SNP     | G  | G         | A       | novel     |    |
| none              | MOF-MA1          | NA       | 0       | 0  | 0         | 0       | 0         | 0  |
|                   | Unknown          | Untested | Somatic | NA | WXS       | none    | 0         | 0  |
|                   | Illumina_NextSeq | NA       | NA      | NA | c.G914A   | NA      | p.R305Q   |    |
| NM_003245         | exon7            | 0        | 0       | 0  | 0         | 0       | 0         | 0  |
|                   | NA               | NA       | NA      | NA | NA        | NA      | NA        | NA |
|                   | NA               | NA       | NA      | NA | NA        | NA      | NA        | NA |
|                   | NA               | NA       | NA      | NA | NA        | NA      | NA        | NA |
|                   | NA               | NA       | NA      | NA | benign    | NA      | NA        | NA |
|                   | 0                | NA       | NA      | NA | NA        | NA      | NA        | 0  |
|                   | 0                | NA       | NA      | NA | NA        | NA      | NA        | NA |
|                   | NA               | NA       | NA      | NA | NA        | NA      | NA        | NA |
|                   | NA               | NA       | NA      | NA | NA        | NA      | NA        | NA |
|                   | NA               | NA       | NA      | NA | NA        | NA      | NA        | NA |
|                   | 0                |          |         |    |           |         |           |    |
| Unknown           | NA               | Moffitt  | hs37d5  | 20 | 3759482   | 3759482 | +         | 0  |

|                   |                  |                  |        |      |                   |         |         |    |
|-------------------|------------------|------------------|--------|------|-------------------|---------|---------|----|
|                   | SNP              | G                | G      | C    | novel             | none    | MOF-AM2 | NA |
|                   | 0                | 0                | 0      | 0    | 0                 | 0       | Unknown |    |
| Untested Somatic  | NA               | NA               | WXS    | none | 0                 | 0       |         |    |
| Illumina_NextSeq  | NA               | NA               | NA     | 0    | NA                | 0       | 0       | 0  |
|                   | 0                | 0                | 0      | 0    | 0                 | 0       | NA      | NA |
|                   | NA               | NA               | NA     | NA   | NA                | NA      | NA      | NA |
|                   | NA               | NA               | NA     | NA   | NA                | NA      | NA      | NA |
|                   | NA               | NA               | NA     | NA   | NA                | NA      | NA      | NA |
|                   | NA               | NA               | NA     | NA   | NA                | NA      | 0       | NA |
|                   | NA               | NA               | NA     | NA   | NA                | 0       | 0       | NA |
|                   | NA               | NA               | NA     | NA   | NA                | NA      | NA      | NA |
|                   | NA               | NA               | NA     | NA   | NA                | NA      | NA      | NA |
|                   | NA               | NA               | NA     | NA   | NA                | NA      | NA      | NA |
|                   | NA               | NA               | NA     | NA   | NA                | NA      | NA      | NA |
| Unknown           | NA               | Moffitt          | hs37d5 | 20   | 3782312           | 3782312 | +       | 0  |
|                   | SNP              | G                | G      | A    | novel             | none    | MOF-AM5 | NA |
|                   | 0                | 0                | 0      | 0    | 0                 | 0       | Unknown |    |
| Untested Somatic  | NA               | NA               | WXS    | none | 0                 | 0       |         |    |
| Illumina_NextSeq  | NA               | NA               | NA     | 0    | NA                | 0       | 0       | 0  |
|                   | 0                | 0                | 0      | 0    | 0                 | 0       | NA      | NA |
|                   | NA               | NA               | NA     | NA   | NA                | NA      | NA      | NA |
|                   | NA               | NA               | NA     | NA   | NA                | NA      | NA      | NA |
|                   | NA               | NA               | NA     | NA   | NA                | NA      | NA      | NA |
|                   | NA               | NA               | NA     | NA   | NA                | NA      | 0       | NA |
|                   | NA               | NA               | NA     | NA   | NA                | 0       | 0       | NA |
|                   | NA               | NA               | NA     | NA   | NA                | NA      | NA      | NA |
|                   | NA               | NA               | NA     | NA   | NA                | NA      | NA      | NA |
|                   | NA               | NA               | NA     | NA   | NA                | NA      | NA      | NA |
|                   | NA               | NA               | NA     | NA   | NA                | NA      | NA      | NA |
|                   | NA               | NA               | NA     | NA   | NA                | NA      | 0       |    |
| CDC25B            | NA               | Moffitt          | hs37d5 | 20   | 3783601           | 3783601 | +       |    |
| Missense_Mutation |                  |                  | SNP    | G    | G                 | C       | novel   |    |
| none              | MOF-AM5          | NA               | 0      | 0    | 0                 | 0       | 0       | 0  |
|                   | Unknown          | Untested Somatic | NA     | NA   | WXS               | none    | 0       | 0  |
|                   | Illumina_NextSeq | NA               | NA     | NA   | c.G1239C          | NA      | p.K413N |    |
| NM_021873         | exon12           | 0                | 0      | 0    | 0                 | 0       | 0       | 0  |
|                   | NA               | NA               | NA     | NA   | NA                | NA      | NA      | NA |
|                   | NA               | NA               | NA     | NA   | NA                | NA      | NA      | NA |
|                   | NA               | NA               | NA     | NA   | NA                | NA      | NA      | NA |
|                   | NA               | NA               | NA     | NA   | probably_damaging |         |         | NA |
|                   | NA               | NA               | 0      | NA   | NA                | NA      | NA      | NA |
|                   | NA               | 0                | 0      | NA   | NA                | NA      | NA      | NA |
|                   | NA               | NA               | NA     | NA   | NA                | NA      | NA      | NA |
|                   | NA               | NA               | NA     | NA   | NA                | NA      | NA      | NA |
|                   | NA               | NA               | NA     | NA   | NA                | NA      | NA      | NA |
|                   | NA               | NA               | 0      | NA   | NA                | NA      | NA      | NA |
| Unknown           | NA               | Moffitt          | hs37d5 | 20   | 3784030           | 3784030 | +       | 0  |
|                   | SNP              | G                | G      | C    | novel             | none    | MOF-AM5 | NA |
|                   | 0                | 0                | 0      | 0    | 0                 | 0       | Unknown |    |
| Untested Somatic  | NA               | NA               | WXS    | none | 0                 | 0       |         |    |
| Illumina_NextSeq  | NA               | NA               | NA     | 0    | NA                | 0       | 0       | 0  |





|                   |                  |          |         |     |                   |          |         |    |
|-------------------|------------------|----------|---------|-----|-------------------|----------|---------|----|
| ACTL10            | NA               | Moffitt  | hs37d5  | 20  | 32255384          | 32255384 | +       |    |
| Missense_Mutation |                  |          | SNP     | C   | C                 | G        | novel   |    |
| none              | MOF-MA1          | NA       | 0       | 0   | 0                 | 0        | 0       | 0  |
|                   | Unknown          | Untested | Somatic | NA  | WXS               | none     | 0       | 0  |
|                   | Illumina_NextSeq | NA       | NA      | NA  | c.C81G            | NA       | p.C27W  |    |
| NM_001024675      | exon1            | 0        | 0       | 0   | 0                 | 0        | 0       | 0  |
|                   | NA               | NA       | NA      | NA  | NA                | NA       | NA      | NA |
|                   | NA               | NA       | NA      | NA  | NA                | NA       | NA      | NA |
|                   | NA               | NA       | NA      | NA  | NA                | NA       | NA      | NA |
|                   | NA               | NA       | NA      | NA  | probably_damaging |          |         | NA |
|                   | NA               | NA       | 0       | NA  | NA                | NA       | NA      | NA |
|                   | NA               | 0        | 0       | NA  | NA                | NA       | NA      | NA |
|                   | NA               | NA       | NA      | NA  | NA                | NA       | NA      | NA |
|                   | NA               | NA       | NA      | NA  | NA                | NA       | NA      | NA |
|                   | NA               | NA       | NA      | NA  | NA                | NA       | NA      | NA |
|                   | NA               | NA       | 0       | NA  | NA                | NA       | NA      | NA |
| Unknown           | NA               | Moffitt  | hs37d5  | 20  | 43585161          | 43585161 | +       | 0  |
|                   | SNP              | G        | G       | A   | novel             | none     | MOF-MA1 | NA |
|                   | 0                | 0        | 0       | 0   | 0                 | 0        | Unknown |    |
|                   | Untested         | Somatic  | NA      | WXS | none              | 0        | 0       |    |
|                   | Illumina_NextSeq | NA       | NA      | 0   | NA                | 0        | 0       | 0  |
|                   | 0                | 0        | 0       | 0   | 0                 | 0        | NA      | NA |
|                   | NA               | NA       | NA      | NA  | NA                | NA       | NA      | NA |
|                   | NA               | NA       | NA      | NA  | NA                | NA       | NA      | NA |
|                   | NA               | NA       | NA      | NA  | NA                | NA       | NA      | NA |
|                   | NA               | NA       | NA      | NA  | NA                | NA       | 0       | NA |
|                   | NA               | NA       | NA      | NA  | NA                | 0        | 0       | NA |
|                   | NA               | NA       | NA      | NA  | NA                | NA       | NA      | NA |
|                   | NA               | NA       | NA      | NA  | NA                | NA       | NA      | NA |
|                   | NA               | NA       | NA      | NA  | NA                | NA       | NA      | NA |
|                   | NA               | NA       | NA      | NA  | NA                | NA       | NA      | NA |
|                   | NA               | NA       | NA      | NA  | NA                | NA       | 0       |    |
| SLC12A5           | NA               | Moffitt  | hs37d5  | 20  | 44672337          | 44672337 | +       |    |
| Missense_Mutation |                  |          | SNP     | A   | A                 | C        | novel   |    |
| none              | MOF-AM2          | NA       | 0       | 0   | 0                 | 0        | 0       | 0  |
|                   | Unknown          | Untested | Somatic | NA  | WXS               | none     | 0       | 0  |
|                   | Illumina_NextSeq | NA       | NA      | NA  | c.A1372C          | NA       | p.T458P |    |
| NM_001134771      | exon10           | 0        | 0       | 0   | 0                 | 0        | 0       | 0  |
|                   | NA               | NA       | NA      | NA  | NA                | NA       | NA      | NA |
|                   | NA               | NA       | NA      | NA  | NA                | NA       | NA      | NA |
|                   | NA               | NA       | NA      | NA  | NA                | NA       | NA      | NA |
|                   | NA               | NA       | NA      | NA  | probably_damaging |          |         | NA |
|                   | NA               | NA       | 0       | NA  | NA                | NA       | NA      | NA |
|                   | NA               | 0        | 0       | NA  | NA                | NA       | NA      | NA |
|                   | NA               | NA       | NA      | NA  | NA                | NA       | NA      | NA |
|                   | NA               | NA       | NA      | NA  | NA                | NA       | NA      | NA |
|                   | NA               | NA       | NA      | NA  | NA                | NA       | NA      | NA |
|                   | NA               | NA       | NA      | NA  | NA                | NA       | NA      | NA |
|                   | NA               | NA       | 0       | NA  | NA                | NA       | NA      | NA |
| Unknown           | NA               | Moffitt  | hs37d5  | 20  | 45985107          | 45985107 | +       | 0  |
|                   | SNP              | C        | C       | G   | novel             | none     | MOF-MA1 | NA |
|                   | 0                | 0        | 0       | 0   | 0                 | 0        | Unknown |    |





|                   |                  |                  |        |         |                   |            |         |    |
|-------------------|------------------|------------------|--------|---------|-------------------|------------|---------|----|
|                   | NA               | NA               | NA     | NA      | NA                | NA         | NA      | NA |
|                   | NA               | NA               | NA     | NA      | NA                | NA         | NA      | NA |
|                   | NA               | NA               | NA     | NA      | possibly_damaging |            |         | NA |
|                   | NA               | NA               | 0      | NA      | NA                | NA         | NA      | NA |
|                   | NA               | 0                | 0      | NA      | NA                | NA         | NA      | NA |
|                   | NA               | NA               | NA     | NA      | NA                | NA         | NA      | NA |
|                   | NA               | NA               | NA     | NA      | NA                | NA         | NA      | NA |
|                   | NA               | NA               | NA     | NA      | NA                | NA         | NA      | NA |
|                   | NA               | NA               | 0      |         |                   |            |         |    |
| Unknown           | NA               | Moffitt          | hs37d5 | 20      | 51802166          | 51802166 + |         | 0  |
|                   | SNP              | G                | G      | A       | novel             | none       | MOF-AM2 | NA |
|                   | 0                | 0                | 0      | 0       | 0                 | 0          | Unknown |    |
| Untested Somatic  | NA               | WXS              | none   |         | 0                 | 0          |         |    |
| Illumina_NextSeq  | NA               | NA               | 0      | NA      | 0                 | 0          | 0       | 0  |
|                   | 0                | 0                | 0      | 0       | 0                 | 0          | NA      | NA |
|                   | NA               | NA               | NA     | NA      | NA                | NA         | NA      | NA |
|                   | NA               | NA               | NA     | NA      | NA                | NA         | NA      | NA |
|                   | NA               | NA               | NA     | NA      | NA                | NA         | NA      | NA |
|                   | NA               | NA               | NA     | NA      | NA                | NA         | 0       | NA |
|                   | NA               | NA               | NA     | NA      | NA                | 0          | 0       | NA |
|                   | NA               | NA               | NA     | NA      | NA                | NA         | NA      | NA |
|                   | NA               | NA               | NA     | NA      | NA                | NA         | NA      | NA |
|                   | NA               | NA               | NA     | NA      | NA                | NA         | NA      | NA |
|                   | NA               | NA               | NA     | NA      | NA                | NA         | 0       |    |
| TFAP2C            | NA               | Moffitt          | hs37d5 | 20      | 55206696          | 55206696 + |         |    |
| Missense_Mutation |                  |                  | SNP    | G       | G                 | C          | novel   |    |
| none              | MOF-AM5          | NA               | 0      | 0       | 0                 | 0          | 0       | 0  |
|                   | Unknown          | Untested Somatic | NA     | WXS     | none              | 0          | 0       | 0  |
|                   | Illumina_NextSeq | NA               | NA     | c.G484C | NA                | p.A162P    |         |    |
| NM_003222         |                  | exon2            | 0      | 0       | 0                 | 0          | 0       | 0  |
|                   | NA               | NA               | NA     | NA      | NA                | NA         | NA      | NA |
|                   | NA               | NA               | NA     | NA      | NA                | NA         | NA      | NA |
|                   | NA               | NA               | NA     | NA      | NA                | NA         | NA      | NA |
|                   | NA               | NA               | NA     | NA      | benign            | NA         | NA      | NA |
|                   | 0                | NA               | NA     | NA      | NA                | NA         | NA      | 0  |
|                   | 0                | NA               | NA     | NA      | NA                | NA         | NA      | NA |
|                   | NA               | NA               | NA     | NA      | NA                | NA         | NA      | NA |
|                   | NA               | NA               | NA     | NA      | NA                | NA         | NA      | NA |
|                   | NA               | NA               | NA     | NA      | NA                | NA         | NA      | NA |
|                   | 0                |                  |        |         |                   |            |         |    |
| CTCF              | NA               | Moffitt          | hs37d5 | 20      | 56093938          | 56093938 + |         |    |
| Missense_Mutation |                  |                  | SNP    | G       | G                 | A          | novel   |    |
| none              | MOF-MA1          | NA               | 0      | 0       | 0                 | 0          | 0       | 0  |
|                   | Unknown          | Untested Somatic | NA     | WXS     | none              | 0          | 0       | 0  |
|                   | Illumina_NextSeq | NA               | NA     | c.C935T | NA                | p.P312L    |         |    |
| NM_080618         |                  | exon5            | 0      | 0       | 0                 | 0          | 0       | 0  |
|                   | NA               | NA               | NA     | NA      | NA                | NA         | NA      | NA |
|                   | NA               | NA               | NA     | NA      | NA                | NA         | NA      | NA |
|                   | NA               | NA               | NA     | NA      | NA                | NA         | NA      | NA |
|                   | NA               | NA               | NA     | NA      | probably_damaging |            |         | NA |



|                   |                  |          |         |    |                   |          |          |    |
|-------------------|------------------|----------|---------|----|-------------------|----------|----------|----|
|                   | NA               | NA       | NA      | NA | NA                | NA       | NA       | NA |
|                   | NA               | NA       | 0       |    |                   |          |          |    |
| ZNF831            | NA               | Moffitt  | hs37d5  | 20 | 57828039          | 57828039 | +        |    |
| Missense_Mutation |                  |          | SNP     | A  | A                 | C        | novel    |    |
| none              | MOF-MA1          | NA       | 0       | 0  | 0                 | 0        | 0        | 0  |
|                   | Unknown          | Untested | Somatic | NA | WXS               | none     | 0        | 0  |
|                   | Illumina_NextSeq | NA       | NA      | NA | c.A4034C          | NA       | p.N1345T |    |
| NM_178457         | exon4            | 0        | 0       | 0  | 0                 | 0        | 0        | 0  |
|                   | NA               | NA       | NA      | NA | NA                | NA       | NA       | NA |
|                   | NA               | NA       | NA      | NA | NA                | NA       | NA       | NA |
|                   | NA               | NA       | NA      | NA | NA                | NA       | NA       | NA |
|                   | NA               | NA       | NA      | NA | possibly_damaging |          |          | NA |
|                   | NA               | NA       | 0       | NA | NA                | NA       | NA       | NA |
|                   | NA               | 0        | 0       | NA | NA                | NA       | NA       | NA |
|                   | NA               | NA       | NA      | NA | NA                | NA       | NA       | NA |
|                   | NA               | NA       | NA      | NA | NA                | NA       | NA       | NA |
|                   | NA               | NA       | NA      | NA | NA                | NA       | NA       | NA |
|                   | NA               | NA       | NA      | NA | NA                | NA       | NA       | NA |
|                   | NA               | NA       | 0       |    |                   |          |          |    |
| Unknown           | NA               | Moffitt  | hs37d5  | 20 | 58467520          | 58467520 | +        | 0  |
|                   | SNP              | A        | A       | T  | novel             | none     | MOF-MA1  | NA |
|                   | 0                | 0        | 0       | 0  | 0                 | 0        | Unknown  |    |
| Untested Somatic  | NA               | WXS      | none    | 0  | 0                 | 0        |          |    |
| Illumina_NextSeq  | NA               | NA       | 0       | NA | 0                 | 0        | NA       | NA |
|                   | 0                | 0        | 0       | 0  | 0                 | 0        | NA       | NA |
|                   | NA               | NA       | NA      | NA | NA                | NA       | NA       | NA |
|                   | NA               | NA       | NA      | NA | NA                | NA       | NA       | NA |
|                   | NA               | NA       | NA      | NA | NA                | NA       | NA       | NA |
|                   | NA               | NA       | NA      | NA | NA                | NA       | 0        | NA |
|                   | NA               | NA       | NA      | NA | NA                | 0        | 0        | NA |
|                   | NA               | NA       | NA      | NA | NA                | NA       | NA       | NA |
|                   | NA               | NA       | NA      | NA | NA                | NA       | NA       | NA |
|                   | NA               | NA       | NA      | NA | NA                | NA       | NA       | NA |
|                   | NA               | NA       | NA      | NA | NA                | NA       | NA       | NA |
|                   | NA               | NA       | NA      | NA | NA                | NA       | 0        | NA |
|                   | NA               | NA       | NA      | NA | NA                | 0        | 0        | NA |
|                   | NA               | NA       | NA      | NA | NA                | NA       | NA       | NA |
|                   | NA               | NA       | NA      | NA | NA                | NA       | NA       | NA |
|                   | NA               | NA       | NA      | NA | NA                | NA       | NA       | NA |
|                   | NA               | NA       | NA      | NA | NA                | NA       | 0        |    |
| Unknown           | NA               | Moffitt  | hs37d5  | 20 | 60896031          | 60896031 | +        | 0  |
|                   | SNP              | T        | T       | G  | novel             | none     | MOF-MA1  | NA |
|                   | 0                | 0        | 0       | 0  | 0                 | 0        | Unknown  |    |
| Untested Somatic  | NA               | WXS      | none    | 0  | 0                 | 0        |          |    |
| Illumina_NextSeq  | NA               | NA       | 0       | NA | 0                 | 0        | 0        | 0  |
|                   | 0                | 0        | 0       | 0  | 0                 | 0        | NA       | NA |
|                   | NA               | NA       | NA      | NA | NA                | NA       | NA       | NA |
|                   | NA               | NA       | NA      | NA | NA                | NA       | NA       | NA |
|                   | NA               | NA       | NA      | NA | NA                | NA       | NA       | NA |
|                   | NA               | NA       | NA      | NA | NA                | NA       | NA       | NA |
|                   | NA               | NA       | NA      | NA | NA                | NA       | 0        | NA |
|                   | NA               | NA       | NA      | NA | NA                | 0        | 0        | NA |
|                   | NA               | NA       | NA      | NA | NA                | NA       | NA       | NA |
|                   | NA               | NA       | NA      | NA | NA                | NA       | NA       | NA |
|                   | NA               | NA       | NA      | NA | NA                | NA       | NA       | NA |
|                   | NA               | NA       | NA      | NA | NA                | NA       | NA       | NA |
|                   | NA               | NA       | NA      | NA | NA                | NA       | 0        |    |
| Unknown           | NA               | Moffitt  | hs37d5  | 20 | 61907828          | 61907828 | +        | 0  |
|                   | SNP              | C        | C       | T  | novel             | none     | MOF-MA1  | NA |



|                  |     |         |        |    |          |          |         |    |
|------------------|-----|---------|--------|----|----------|----------|---------|----|
|                  | NA  | NA      | NA     | NA | NA       | NA       | NA      | NA |
|                  | NA  | NA      | NA     | NA | NA       | NA       | NA      | NA |
|                  | NA  | NA      | NA     | NA | NA       | NA       | NA      | NA |
|                  | NA  | NA      | NA     | NA | NA       | NA       | 0       | NA |
|                  | NA  | NA      | NA     | NA | NA       | 0        | 0       | NA |
|                  | NA  | NA      | NA     | NA | NA       | NA       | NA      | NA |
|                  | NA  | NA      | NA     | NA | NA       | NA       | NA      | NA |
|                  | NA  | NA      | NA     | NA | NA       | NA       | NA      | NA |
|                  | NA  | NA      | NA     | NA | NA       | NA       | 0       | NA |
| Unknown          | NA  | Moffitt | hs37d5 | 21 | 37767004 | 37767004 | +       | 0  |
|                  | SNP | G       | G      | C  | novel    | none     | MOF-MA1 | NA |
|                  | 0   | 0       | 0      | 0  | 0        | 0        | Unknown |    |
| Untested Somatic | NA  | WXS     | none   | 0  | 0        |          |         |    |
| Illumina_NextSeq | NA  | NA      | 0      | NA | 0        | 0        | 0       | 0  |
|                  | 0   | 0       | 0      | 0  | 0        | 0        | NA      | NA |
|                  | NA  | NA      | NA     | NA | NA       | NA       | NA      | NA |
|                  | NA  | NA      | NA     | NA | NA       | NA       | NA      | NA |
|                  | NA  | NA      | NA     | NA | NA       | NA       | NA      | NA |
|                  | NA  | NA      | NA     | NA | NA       | NA       | 0       | NA |
|                  | NA  | NA      | NA     | NA | NA       | 0        | 0       | NA |
|                  | NA  | NA      | NA     | NA | NA       | NA       | NA      | NA |
|                  | NA  | NA      | NA     | NA | NA       | NA       | NA      | NA |
|                  | NA  | NA      | NA     | NA | NA       | NA       | NA      | NA |
|                  | NA  | NA      | NA     | NA | NA       | NA       | 0       | NA |
| Unknown          | NA  | Moffitt | hs37d5 | 21 | 41709942 | 41709942 | +       | 0  |
|                  | SNP | T       | T      | G  | novel    | none     | MOF-AM2 | NA |
|                  | 0   | 0       | 0      | 0  | 0        | 0        | Unknown |    |
| Untested Somatic | NA  | WXS     | none   | 0  | 0        |          |         |    |
| Illumina_NextSeq | NA  | NA      | 0      | NA | 0        | 0        | 0       | 0  |
|                  | 0   | 0       | 0      | 0  | 0        | 0        | NA      | NA |
|                  | NA  | NA      | NA     | NA | NA       | NA       | NA      | NA |
|                  | NA  | NA      | NA     | NA | NA       | NA       | NA      | NA |
|                  | NA  | NA      | NA     | NA | NA       | NA       | NA      | NA |
|                  | NA  | NA      | NA     | NA | NA       | NA       | 0       | NA |
|                  | NA  | NA      | NA     | NA | NA       | 0        | 0       | NA |
|                  | NA  | NA      | NA     | NA | NA       | NA       | NA      | NA |
|                  | NA  | NA      | NA     | NA | NA       | NA       | NA      | NA |
|                  | NA  | NA      | NA     | NA | NA       | NA       | NA      | NA |
|                  | NA  | NA      | NA     | NA | NA       | NA       | 0       | NA |
| Unknown          | NA  | Moffitt | hs37d5 | 21 | 42861573 | 42861573 | +       | 0  |
|                  | SNP | G       | G      | C  | novel    | none     | MOF-AM2 | NA |
|                  | 0   | 0       | 0      | 0  | 0        | 0        | Unknown |    |
| Untested Somatic | NA  | WXS     | none   | 0  | 0        |          |         |    |
| Illumina_NextSeq | NA  | NA      | 0      | NA | 0        | 0        | 0       | 0  |
|                  | 0   | 0       | 0      | 0  | 0        | 0        | NA      | NA |
|                  | NA  | NA      | NA     | NA | NA       | NA       | NA      | NA |
|                  | NA  | NA      | NA     | NA | NA       | NA       | NA      | NA |
|                  | NA  | NA      | NA     | NA | NA       | NA       | NA      | NA |
|                  | NA  | NA      | NA     | NA | NA       | NA       | 0       | NA |
|                  | NA  | NA      | NA     | NA | NA       | 0        | 0       | NA |

|                  |     |         |        |    |          |            |         |    |
|------------------|-----|---------|--------|----|----------|------------|---------|----|
|                  | NA  | NA      | NA     | NA | NA       | NA         | NA      | NA |
|                  | NA  | NA      | NA     | NA | NA       | NA         | NA      | NA |
|                  | NA  | NA      | NA     | NA | NA       | NA         | NA      | NA |
|                  | NA  | NA      | NA     | NA | NA       | NA         | 0       |    |
| Unknown          | NA  | Moffitt | hs37d5 | 21 | 43783566 | 43783566 + |         | 0  |
|                  | SNP | G       | G      | C  | novel    | none       | MOF-AM5 | NA |
|                  | 0   | 0       | 0      | 0  | 0        | 0          | Unknown |    |
| Untested Somatic | NA  | WXS     | none   |    | 0        | 0          |         |    |
| Illumina_NextSeq | NA  | NA      | 0      | NA | 0        | 0          | 0       | 0  |
|                  | 0   | 0       | 0      | 0  | 0        | 0          | NA      | NA |
|                  | NA  | NA      | NA     | NA | NA       | NA         | NA      | NA |
|                  | NA  | NA      | NA     | NA | NA       | NA         | NA      | NA |
|                  | NA  | NA      | NA     | NA | NA       | NA         | NA      | NA |
|                  | NA  | NA      | NA     | NA | NA       | NA         | 0       | NA |
|                  | NA  | NA      | NA     | NA | NA       | 0          | 0       | NA |
|                  | NA  | NA      | NA     | NA | NA       | NA         | NA      | NA |
|                  | NA  | NA      | NA     | NA | NA       | NA         | NA      | NA |
|                  | NA  | NA      | NA     | NA | NA       | NA         | NA      | NA |
|                  | NA  | NA      | NA     | NA | NA       | NA         | 0       | NA |
| Unknown          | NA  | Moffitt | hs37d5 | 21 | 45548293 | 45548293 + |         | 0  |
|                  | SNP | C       | C      | T  | novel    | none       | MOF-MA1 | NA |
|                  | 0   | 0       | 0      | 0  | 0        | 0          | Unknown |    |
| Untested Somatic | NA  | WXS     | none   |    | 0        | 0          |         |    |
| Illumina_NextSeq | NA  | NA      | 0      | NA | 0        | 0          | 0       | 0  |
|                  | 0   | 0       | 0      | 0  | 0        | 0          | NA      | NA |
|                  | NA  | NA      | NA     | NA | NA       | NA         | NA      | NA |
|                  | NA  | NA      | NA     | NA | NA       | NA         | NA      | NA |
|                  | NA  | NA      | NA     | NA | NA       | NA         | NA      | NA |
|                  | NA  | NA      | NA     | NA | NA       | NA         | 0       | NA |
|                  | NA  | NA      | NA     | NA | NA       | 0          | 0       | NA |
|                  | NA  | NA      | NA     | NA | NA       | NA         | NA      | NA |
|                  | NA  | NA      | NA     | NA | NA       | NA         | NA      | NA |
|                  | NA  | NA      | NA     | NA | NA       | NA         | NA      | NA |
|                  | NA  | NA      | NA     | NA | NA       | NA         | 0       | NA |
| Unknown          | NA  | Moffitt | hs37d5 | 21 | 46935067 | 46935067 + |         | 0  |
|                  | SNP | C       | C      | G  | novel    | none       | MOF-MA1 | NA |
|                  | 0   | 0       | 0      | 0  | 0        | 0          | Unknown |    |
| Untested Somatic | NA  | WXS     | none   |    | 0        | 0          |         |    |
| Illumina_NextSeq | NA  | NA      | 0      | NA | 0        | 0          | 0       | 0  |
|                  | 0   | 0       | 0      | 0  | 0        | 0          | NA      | NA |
|                  | NA  | NA      | NA     | NA | NA       | NA         | NA      | NA |
|                  | NA  | NA      | NA     | NA | NA       | NA         | NA      | NA |
|                  | NA  | NA      | NA     | NA | NA       | NA         | NA      | NA |
|                  | NA  | NA      | NA     | NA | NA       | NA         | 0       | NA |
|                  | NA  | NA      | NA     | NA | NA       | 0          | 0       | NA |
|                  | NA  | NA      | NA     | NA | NA       | NA         | NA      | NA |
|                  | NA  | NA      | NA     | NA | NA       | NA         | NA      | NA |
|                  | NA  | NA      | NA     | NA | NA       | NA         | NA      | NA |
|                  | NA  | NA      | NA     | NA | NA       | NA         | 0       | NA |
| IL17RA           | NA  | Moffitt | hs37d5 | 22 | 17589196 | 17589196 + |         |    |

|                   |                  |                  |             |          |                   |          |         |    |
|-------------------|------------------|------------------|-------------|----------|-------------------|----------|---------|----|
| Splice_Site       | SNP              | G                | G           | A        | novel             | none     |         |    |
| MOF-AM2           | NA               | 0                | 0           | 0        | 0                 | 0        | 0       |    |
| Unknown           | Untested Somatic | NA               | WXS         | none     | 0                 | 0        | 0       |    |
| Illumina_NextSeq  | NA               | NA               | c.1088-1G>A | NA       | NA                | 0        | 0       |    |
| NM_014339         | exon13           | 0                | 0           | 0        | 0                 | 0        | 0       | 0  |
|                   | NA               | NA               | NA          | NA       | NA                | NA       | NA      | NA |
|                   | NA               | NA               | NA          | NA       | NA                | NA       | NA      | NA |
|                   | NA               | NA               | NA          | NA       | NA                | NA       | NA      | NA |
|                   | 0                | NA               | NA          | NA       | NA                | NA       | NA      | 0  |
|                   | 0                | NA               | NA          | NA       | NA                | NA       | NA      | NA |
|                   | NA               | NA               | NA          | NA       | NA                | NA       | NA      | NA |
|                   | NA               | NA               | NA          | NA       | NA                | NA       | NA      | NA |
|                   | NA               | NA               | NA          | NA       | NA                | NA       | NA      | NA |
|                   | 0                |                  |             |          |                   |          |         |    |
| IL17RA            | NA               | Moffitt          | hs37d5      | 22       | 17589746          | 17589746 | +       |    |
| Missense_Mutation |                  |                  | SNP         | G        | G                 | A        | novel   |    |
| none              | MOF-AM5          | NA               | 0           | 0        | 0                 | 0        | 0       | 0  |
|                   | Unknown          | Untested Somatic | NA          | WXS      | none              | 0        | 0       | 0  |
|                   | Illumina_NextSeq | NA               | NA          | c.G1637A | NA                | p.R546H  |         |    |
| NM_014339         | exon13           | 0                | 0           | 0        | 0                 | 0        | 0       | 0  |
|                   | NA               | NA               | NA          | NA       | NA                | NA       | NA      | NA |
|                   | NA               | NA               | NA          | NA       | NA                | NA       | NA      | NA |
|                   | NA               | NA               | NA          | NA       | NA                | NA       | NA      | NA |
|                   | NA               | NA               | NA          | NA       | probably_damaging |          |         | NA |
|                   | NA               | NA               | 0           | NA       | NA                | NA       | NA      | NA |
|                   | NA               | 0                | 0           | NA       | NA                | NA       | NA      | NA |
|                   | NA               | NA               | NA          | NA       | NA                | NA       | NA      | NA |
|                   | NA               | NA               | NA          | NA       | NA                | NA       | NA      | NA |
|                   | NA               | NA               | NA          | NA       | NA                | NA       | NA      | NA |
|                   | NA               | NA               | 1           |          |                   |          |         |    |
| Unknown           | NA               | Moffitt          | hs37d5      | 22       | 20041098          | 20041098 | +       | 0  |
|                   | SNP              | C                | C           | T        | novel             | none     | MOF-MA1 | NA |
|                   | 0                | 0                | 0           | 0        | 0                 | 0        | Unknown |    |
| Untested Somatic  | NA               | WXS              | none        | 0        | 0                 | 0        |         |    |
| Illumina_NextSeq  | NA               | NA               | 0           | NA       | 0                 | 0        | 0       | 0  |
|                   | 0                | 0                | 0           | 0        | 0                 | 0        | NA      | NA |
|                   | NA               | NA               | NA          | NA       | NA                | NA       | NA      | NA |
|                   | NA               | NA               | NA          | NA       | NA                | NA       | NA      | NA |
|                   | NA               | NA               | NA          | NA       | NA                | NA       | NA      | NA |
|                   | NA               | NA               | NA          | NA       | NA                | NA       | 0.0005  | NA |
|                   | NA               | NA               | NA          | NA       | NA                | 0        | 0       | NA |
|                   | NA               | NA               | NA          | NA       | NA                | NA       | NA      | NA |
|                   | NA               | NA               | NA          | NA       | NA                | NA       | NA      | NA |
|                   | NA               | NA               | NA          | NA       | NA                | NA       | NA      | NA |
|                   | NA               | NA               | NA          | NA       | NA                | NA       | 0       |    |
| Unknown           | NA               | Moffitt          | hs37d5      | 22       | 20862141          | 20862141 | +       | 0  |
|                   | SNP              | A                | A           | C        | novel             | none     | MOF-MA1 | NA |
|                   | 0                | 0                | 0           | 0        | 0                 | 0        | Unknown |    |
| Untested Somatic  | NA               | WXS              | none        | 0        | 0                 | 0        |         |    |







|                   |                  |                  |        |        |                   |            |         |    |
|-------------------|------------------|------------------|--------|--------|-------------------|------------|---------|----|
|                   | NA               | NA               | NA     | NA     | NA                | NA         | NA      | NA |
|                   | 0                |                  |        |        |                   |            |         |    |
| Unknown           | NA               | Moffitt          | hs37d5 | 22     | 37425700          | 37425700 + |         | 0  |
|                   | SNP              | C                | C      | T      | novel             | none       | MOF-MA1 | NA |
|                   | 0                | 0                | 0      | 0      | 0                 | 0          | Unknown |    |
| Untested Somatic  | NA               | WXS              | none   |        | 0                 | 0          |         |    |
| Illumina_NextSeq  | NA               | NA               | 0      | 0      | NA                | 0          | 0       | 0  |
|                   | 0                | 0                | 0      | 0      | 0                 | 0          | NA      | NA |
|                   | NA               | NA               | NA     | NA     | NA                | NA         | NA      | NA |
|                   | NA               | NA               | NA     | NA     | NA                | NA         | NA      | NA |
|                   | NA               | NA               | NA     | NA     | NA                | NA         | NA      | NA |
|                   | NA               | NA               | NA     | NA     | NA                | NA         | 0       | NA |
|                   | NA               | NA               | NA     | NA     | NA                | 0          | 0       | NA |
|                   | NA               | NA               | NA     | NA     | NA                | NA         | NA      | NA |
|                   | NA               | NA               | NA     | NA     | NA                | NA         | NA      | NA |
|                   | NA               | NA               | NA     | NA     | NA                | NA         | NA      | NA |
|                   | NA               | NA               | NA     | NA     | NA                | NA         | 0       | NA |
|                   | NA               | NA               | NA     | NA     | NA                | NA         | NA      | NA |
|                   | NA               | NA               | NA     | NA     | NA                | NA         | NA      | NA |
|                   | NA               | NA               | NA     | NA     | NA                | NA         | 0       | NA |
| RAC2              | NA               | Moffitt          | hs37d5 | 22     | 37640163          | 37640163 + |         |    |
| Missense_Mutation |                  | SNP              | A      | A      | A                 | G          | novel   |    |
| none              | MOF-AM5          | NA               | 0      | 0      | 0                 | 0          | 0       | 0  |
|                   | Unknown          | Untested Somatic | NA     | WXS    | none              | 0          | 0       | 0  |
|                   | Illumina_NextSeq | NA               | NA     | c.T26C | NA                | p.V9A      |         |    |
| NM_002872         | exon1            | 0                | 0      | 0      | 0                 | 0          | 0       | 0  |
|                   | NA               | NA               | NA     | NA     | NA                | NA         | NA      | NA |
|                   | NA               | NA               | NA     | NA     | NA                | NA         | NA      | NA |
|                   | NA               | NA               | NA     | NA     | NA                | NA         | NA      | NA |
|                   | NA               | NA               | NA     | NA     | possibly_damaging |            |         | NA |
|                   | NA               | NA               | 0      | NA     | NA                | NA         | NA      | NA |
|                   | NA               | 0                | 0      | NA     | NA                | NA         | NA      | NA |
|                   | NA               | NA               | NA     | NA     | NA                | NA         | NA      | NA |
|                   | NA               | NA               | NA     | NA     | NA                | NA         | NA      | NA |
|                   | NA               | NA               | NA     | NA     | NA                | NA         | NA      | NA |
|                   | NA               | NA               | NA     | NA     | NA                | NA         | NA      | NA |
|                   | NA               | NA               | 0      |        |                   |            |         |    |
| Unknown           | NA               | Moffitt          | hs37d5 | 22     | 37903983          | 37903983 + |         | 0  |
|                   | SNP              | G                | G      | C      | novel             | none       | MOF-MA1 | NA |
|                   | 0                | 0                | 0      | 0      | 0                 | 0          | Unknown |    |
| Untested Somatic  | NA               | WXS              | none   |        | 0                 | 0          |         |    |
| Illumina_NextSeq  | NA               | NA               | 0      | 0      | NA                | 0          | 0       | 0  |
|                   | 0                | 0                | 0      | 0      | 0                 | 0          | NA      | NA |
|                   | NA               | NA               | NA     | NA     | NA                | NA         | NA      | NA |
|                   | NA               | NA               | NA     | NA     | NA                | NA         | NA      | NA |
|                   | NA               | NA               | NA     | NA     | NA                | NA         | NA      | NA |
|                   | NA               | NA               | NA     | NA     | NA                | NA         | 0       | NA |
|                   | NA               | NA               | NA     | NA     | NA                | 0          | 0       | NA |
|                   | NA               | NA               | NA     | NA     | NA                | NA         | NA      | NA |
|                   | NA               | NA               | NA     | NA     | NA                | NA         | NA      | NA |
|                   | NA               | NA               | NA     | NA     | NA                | NA         | NA      | NA |
|                   | NA               | NA               | NA     | NA     | NA                | NA         | NA      | NA |
|                   | NA               | NA               | NA     | NA     | NA                | NA         | 0       | NA |
|                   | NA               | NA               | NA     | NA     | NA                | NA         | 0       | NA |
| Unknown           | NA               | Moffitt          | hs37d5 | 22     | 37903984          | 37903984 + |         | 0  |
|                   | SNP              | T                | T      | G      | novel             | none       | MOF-MA1 | NA |





|                   |                  |          |         |    |                   |         |         |    |
|-------------------|------------------|----------|---------|----|-------------------|---------|---------|----|
|                   | NA               | NA       | NA      | NA | NA                | NA      | NA      | NA |
|                   | NA               | NA       | NA      | NA | NA                | NA      | NA      | NA |
|                   | NA               | NA       | NA      | NA | NA                | NA      | 0       |    |
| LHFPL4            | NA               | Moffitt  | hs37d5  | 3  | 9547693           | 9547693 | +       |    |
| Nonsense_Mutation |                  |          | SNP     | G  | G                 | A       | novel   |    |
| none              | MOF-AM2          | NA       | 0       | 0  | 0                 | 0       | 0       | 0  |
|                   | Unknown          | Untested | Somatic | NA | WXS               | none    | 0       | 0  |
|                   | Illumina_NextSeq | NA       | NA      | NA | c.C601T           | NA      | p.Q201X |    |
| NM_198560         | exon3            | 0        | 0       | 0  | 0                 | 0       | 0       | 0  |
|                   | NA               | NA       | NA      | NA | NA                | NA      | NA      | NA |
|                   | NA               | NA       | NA      | NA | NA                | NA      | NA      | NA |
|                   | NA               | NA       | NA      | NA | NA                | NA      | NA      | NA |
|                   | NA               | NA       | NA      | NA | possibly_damaging |         |         | NA |
|                   | NA               | NA       | 0       | NA | NA                | NA      | NA      | NA |
|                   | NA               | 0        | 0       | NA | NA                | NA      | NA      | NA |
|                   | NA               | NA       | NA      | NA | NA                | NA      | NA      | NA |
|                   | NA               | NA       | NA      | NA | NA                | NA      | NA      | NA |
|                   | NA               | NA       | NA      | NA | NA                | NA      | NA      | NA |
|                   | NA               | NA       | NA      | NA | NA                | NA      | NA      | NA |
|                   | NA               | NA       | 0       | NA | NA                | NA      | NA      | NA |
| Unknown           | NA               | Moffitt  | hs37d5  | 3  | 9594398           | 9594398 | +       | 0  |
|                   | SNP              | T        | T       | G  | novel             | none    | MOF-MA1 | NA |
|                   | 0                | 0        | 0       | 0  | 0                 | 0       | Unknown |    |
| Untested Somatic  | NA               | WXS      | none    | 0  | 0                 |         |         |    |
| Illumina_NextSeq  | NA               | NA       | 0       | NA | 0                 | 0       | 0       | 0  |
|                   | 0                | 0        | 0       | 0  | 0                 | 0       | NA      | NA |
|                   | NA               | NA       | NA      | NA | NA                | NA      | NA      | NA |
|                   | NA               | NA       | NA      | NA | NA                | NA      | NA      | NA |
|                   | NA               | NA       | NA      | NA | NA                | NA      | NA      | NA |
|                   | NA               | NA       | NA      | NA | NA                | NA      | 0       | NA |
|                   | NA               | NA       | NA      | NA | NA                | 0       | 0       | NA |
|                   | NA               | NA       | NA      | NA | NA                | NA      | NA      | NA |
|                   | NA               | NA       | NA      | NA | NA                | NA      | NA      | NA |
|                   | NA               | NA       | NA      | NA | NA                | NA      | NA      | NA |
|                   | NA               | NA       | NA      | NA | NA                | NA      | NA      | NA |
|                   | NA               | NA       | NA      | NA | NA                | NA      | 0       | NA |
|                   | NA               | NA       | NA      | NA | NA                | 0       | 0       | NA |
|                   | NA               | NA       | NA      | NA | NA                | NA      | NA      | NA |
|                   | NA               | NA       | NA      | NA | NA                | NA      | NA      | NA |
|                   | NA               | NA       | NA      | NA | NA                | NA      | NA      | NA |
|                   | NA               | NA       | NA      | NA | NA                | NA      | 0       |    |
| Unknown           | NA               | Moffitt  | hs37d5  | 3  | 9769084           | 9769084 | +       | 0  |
|                   | SNP              | G        | G       | T  | novel             | none    | MOF-MA1 | NA |
|                   | 0                | 0        | 0       | 0  | 0                 | 0       | Unknown |    |
| Untested Somatic  | NA               | WXS      | none    | 0  | 0                 |         |         |    |
| Illumina_NextSeq  | NA               | NA       | 0       | NA | 0                 | 0       | 0       | 0  |
|                   | 0                | 0        | 0       | 0  | 0                 | 0       | NA      | NA |
|                   | NA               | NA       | NA      | NA | NA                | NA      | NA      | NA |
|                   | NA               | NA       | NA      | NA | NA                | NA      | NA      | NA |
|                   | NA               | NA       | NA      | NA | NA                | NA      | NA      | NA |
|                   | NA               | NA       | NA      | NA | NA                | NA      | NA      | NA |
|                   | NA               | NA       | NA      | NA | NA                | NA      | 0       | NA |
|                   | NA               | NA       | NA      | NA | NA                | 0       | 0       | NA |
|                   | NA               | NA       | NA      | NA | NA                | NA      | NA      | NA |
|                   | NA               | NA       | NA      | NA | NA                | NA      | NA      | NA |
|                   | NA               | NA       | NA      | NA | NA                | NA      | NA      | NA |
|                   | NA               | NA       | NA      | NA | NA                | NA      | NA      | NA |
|                   | NA               | NA       | NA      | NA | NA                | NA      | 0       |    |
| IL17RE            | NA               | Moffitt  | hs37d5  | 3  | 9944691           | 9944691 | +       |    |

|                   |                  |                  |        |         |                   |            |           |    |
|-------------------|------------------|------------------|--------|---------|-------------------|------------|-----------|----|
| Silent            | SNP              | G                | G      | A       | novel             | none       | MOF-MA1   | NA |
|                   | 0                | 0                | 0      | 0       | 0                 | 0          | Unknown   |    |
| Untested Somatic  | NA               | NA               | WXS    | none    | 0                 | 0          |           |    |
| Illumina_NextSeq  | NA               | NA               | NA     | c.G195A | NA                | p.G65G     | NM_153483 |    |
|                   | exon2            | 0                | 0      | 0       | 0                 | 0          | 0         | NA |
|                   | NA               | NA               | NA     | NA      | NA                | NA         | NA        | NA |
|                   | NA               | NA               | NA     | NA      | NA                | NA         | NA        | NA |
|                   | NA               | NA               | NA     | NA      | NA                | NA         | NA        | 0  |
|                   | NA               | NA               | NA     | NA      | NA                | NA         | 0         | 0  |
|                   | NA               | NA               | NA     | NA      | NA                | NA         | NA        | NA |
|                   | NA               | NA               | NA     | NA      | NA                | NA         | NA        | NA |
|                   | NA               | NA               | NA     | NA      | NA                | NA         | NA        | NA |
|                   | NA               | NA               | NA     | NA      | NA                | NA         | NA        | NA |
|                   | NA               | NA               | NA     | NA      | NA                | NA         | NA        | 0  |
| ATP2B2            | NA               | Moffitt          | hs37d5 | 3       | 10442697          | 10442697 + |           |    |
| Missense_Mutation |                  |                  | SNP    | G       | G                 | T          | novel     |    |
| none              | MOF-AM5          | NA               | 0      | 0       | 0                 | 0          | 0         | 0  |
|                   | Unknown          | Untested Somatic | NA     | NA      | WXS               | none       | 0         | 0  |
|                   | Illumina_NextSeq | NA               | NA     | NA      | c.C721A           | NA         | p.L241I   |    |
| NM_001001331      | exon5            | 0                | 0      | 0       | 0                 | 0          | 0         | 0  |
|                   | NA               | NA               | NA     | NA      | NA                | NA         | NA        | NA |
|                   | NA               | NA               | NA     | NA      | NA                | NA         | NA        | NA |
|                   | NA               | NA               | NA     | NA      | NA                | NA         | NA        | NA |
|                   | NA               | NA               | NA     | NA      | possibly_damaging |            |           | NA |
|                   | NA               | NA               | 0      | NA      | NA                | NA         | NA        | NA |
|                   | NA               | 0                | 0      | NA      | NA                | NA         | NA        | NA |
|                   | NA               | NA               | NA     | NA      | NA                | NA         | NA        | NA |
|                   | NA               | NA               | NA     | NA      | NA                | NA         | NA        | NA |
|                   | NA               | NA               | NA     | NA      | NA                | NA         | NA        | NA |
|                   | NA               | NA               | NA     | NA      | NA                | NA         | NA        | NA |
|                   | NA               | NA               | 0      | NA      | NA                | NA         | NA        | NA |
| NUP210            | NA               | Moffitt          | hs37d5 | 3       | 13368885          | 13368885 + |           |    |
| Missense_Mutation |                  |                  | SNP    | G       | G                 | A          | novel     |    |
| none              | MOF-AM2          | NA               | 0      | 0       | 0                 | 0          | 0         | 0  |
|                   | Unknown          | Untested Somatic | NA     | NA      | WXS               | none       | 0         | 0  |
|                   | Illumina_NextSeq | NA               | NA     | NA      | c.C4339T          | NA         | p.R1447C  |    |
| NM_024923         | exon32           | 0                | 0      | 0       | 0                 | 0          | 0         | 0  |
|                   | NA               | NA               | NA     | NA      | NA                | NA         | NA        | NA |
|                   | NA               | NA               | NA     | NA      | NA                | NA         | NA        | NA |
|                   | NA               | NA               | NA     | NA      | NA                | NA         | NA        | NA |
|                   | NA               | NA               | NA     | NA      | possibly_damaging |            |           | NA |
|                   | NA               | NA               | 0      | NA      | NA                | NA         | NA        | NA |
|                   | NA               | 0                | 0      | NA      | NA                | NA         | NA        | NA |
|                   | NA               | NA               | NA     | NA      | NA                | NA         | NA        | NA |
|                   | NA               | NA               | NA     | NA      | NA                | NA         | NA        | NA |
|                   | NA               | NA               | NA     | NA      | NA                | NA         | NA        | NA |
|                   | NA               | NA               | NA     | NA      | NA                | NA         | NA        | NA |
|                   | NA               | NA               | 0      | NA      | NA                | NA         | NA        | NA |
| NUP210            | NA               | Moffitt          | hs37d5 | 3       | 13421209          | 13421209 + |           |    |
| Missense_Mutation |                  |                  | SNP    | G       | G                 | A          | novel     |    |
| none              | MOF-AM2          | NA               | 0      | 0       | 0                 | 0          | 0         | 0  |
|                   | Unknown          | Untested Somatic | NA     | NA      | WXS               | none       | 0         | 0  |







|                  |          |         |         |    |          |            |         |    |
|------------------|----------|---------|---------|----|----------|------------|---------|----|
|                  | NA       | NA      | NA      | NA | NA       | NA         | NA      | NA |
|                  | NA       | NA      | NA      | NA | NA       | NA         | NA      | NA |
|                  | NA       | NA      | NA      | NA | NA       | NA         | NA      | 0  |
| CCR2             | NA       | Moffitt | hs37d5  | 3  | 46399207 | 46399207 + |         |    |
| Silent           | SNP      | C       | C       | T  | novel    | none       | MOF-AM2 | NA |
|                  | 0        | 0       | 0       | 0  | 0        | 0          | Unknown |    |
| Untested Somatic | NA       | WXS     | none    | 0  | 0        | 0          |         |    |
| Illumina_NextSeq | NA       | NA      | c.C189T | NA | NA       | p.V63V     |         |    |
| NM_001123041     | exon2    | 0       | 0       | 0  | 0        | 0          | 0       | 0  |
|                  | NA       | NA      | NA      | NA | NA       | NA         | NA      | NA |
|                  | NA       | NA      | NA      | NA | NA       | NA         | NA      | NA |
|                  | NA       | NA      | NA      | NA | NA       | NA         | NA      | NA |
|                  | NA       | NA      | NA      | NA | NA       | NA         | NA      | NA |
|                  | 0        | NA      | NA      | NA | NA       | NA         | NA      | NA |
| 0.000000         | 0.000140 | NA      | NA      | NA | NA       | NA         | NA      | NA |
|                  | NA       | NA      | NA      | NA | NA       | NA         | NA      | NA |
|                  | NA       | NA      | NA      | NA | NA       | NA         | NA      | NA |
|                  | NA       | NA      | NA      | NA | NA       | NA         | NA      | NA |
|                  | 0        |         |         |    |          |            |         |    |
| Unknown          | NA       | Moffitt | hs37d5  | 3  | 47823086 | 47823086 + |         | 0  |
|                  | SNP      | A       | A       | C  | novel    | none       | MOF-MA1 | NA |
|                  | 0        | 0       | 0       | 0  | 0        | 0          | Unknown |    |
| Untested Somatic | NA       | WXS     | none    | 0  | 0        | 0          |         |    |
| Illumina_NextSeq | NA       | NA      | 0       | NA | 0        | 0          | NA      | 0  |
|                  | 0        | 0       | 0       | 0  | 0        | 0          | NA      | NA |
|                  | NA       | NA      | NA      | NA | NA       | NA         | NA      | NA |
|                  | NA       | NA      | NA      | NA | NA       | NA         | NA      | NA |
|                  | NA       | NA      | NA      | NA | NA       | NA         | NA      | NA |
|                  | NA       | NA      | NA      | NA | NA       | NA         | 0       | NA |
|                  | NA       | NA      | NA      | NA | NA       | 0          | 0       | NA |
|                  | NA       | NA      | NA      | NA | NA       | NA         | NA      | NA |
|                  | NA       | NA      | NA      | NA | NA       | NA         | NA      | NA |
|                  | NA       | NA      | NA      | NA | NA       | NA         | NA      | NA |
|                  | NA       | NA      | NA      | NA | NA       | NA         | NA      | NA |
|                  | NA       | NA      | NA      | NA | NA       | NA         | 0       | NA |
|                  | NA       | NA      | NA      | NA | NA       | NA         | NA      | NA |
|                  | NA       | NA      | NA      | NA | NA       | NA         | NA      | NA |
|                  | NA       | NA      | NA      | NA | NA       | NA         | 0       | NA |
| Unknown          | NA       | Moffitt | hs37d5  | 3  | 48607983 | 48607983 + |         | 0  |
|                  | SNP      | C       | C       | G  | novel    | none       | MOF-AM2 | NA |
|                  | 0        | 0       | 0       | 0  | 0        | 0          | Unknown |    |
| Untested Somatic | NA       | WXS     | none    | 0  | 0        | 0          |         |    |
| Illumina_NextSeq | NA       | NA      | 0       | NA | 0        | 0          | NA      | 0  |
|                  | 0        | 0       | 0       | 0  | 0        | 0          | NA      | NA |
|                  | NA       | NA      | NA      | NA | NA       | NA         | NA      | NA |
|                  | NA       | NA      | NA      | NA | NA       | NA         | NA      | NA |
|                  | NA       | NA      | NA      | NA | NA       | NA         | NA      | NA |
|                  | NA       | NA      | NA      | NA | NA       | NA         | 0       | NA |
|                  | NA       | NA      | NA      | NA | NA       | 0          | 0       | NA |
|                  | NA       | NA      | NA      | NA | NA       | NA         | NA      | NA |
|                  | NA       | NA      | NA      | NA | NA       | NA         | NA      | NA |
|                  | NA       | NA      | NA      | NA | NA       | NA         | NA      | NA |
|                  | NA       | NA      | NA      | NA | NA       | NA         | 0       | NA |
| Unknown          | NA       | Moffitt | hs37d5  | 3  | 48692688 | 48692688 + |         | 0  |

|                  |       |         |        |         |          |           |           |    |
|------------------|-------|---------|--------|---------|----------|-----------|-----------|----|
|                  | SNP   | G       | G      | A       | novel    | none      | MOF-MA1   | NA |
|                  | 0     | 0       | 0      | 0       | 0        | 0         | Unknown   |    |
| Untested Somatic | NA    | NA      | WXS    | none    | 0        | 0         |           |    |
| Illumina_NextSeq | NA    | NA      | NA     | 0       | NA       | 0         | 0         | 0  |
|                  | 0     | 0       | 0      | 0       | 0        | 0         | NA        | NA |
|                  | NA    | NA      | NA     | NA      | NA       | NA        | NA        | NA |
|                  | NA    | NA      | NA     | NA      | NA       | NA        | NA        | NA |
|                  | NA    | NA      | NA     | NA      | NA       | NA        | NA        | NA |
|                  | NA    | NA      | NA     | NA      | NA       | NA        | 0         | NA |
|                  | NA    | NA      | NA     | NA      | NA       | 0         | 0         | NA |
|                  | NA    | NA      | NA     | NA      | NA       | NA        | NA        | NA |
|                  | NA    | NA      | NA     | NA      | NA       | NA        | NA        | NA |
|                  | NA    | NA      | NA     | NA      | NA       | NA        | NA        | NA |
|                  | NA    | NA      | NA     | NA      | NA       | NA        | NA        | NA |
| P4HTM            | NA    | Moffitt | hs37d5 | 3       | 49027821 | 49027821+ |           |    |
| Silent           | SNP   | A       | A      | C       | novel    | none      | MOF-MA1   | NA |
|                  | 0     | 0       | 0      | 0       | 0        | 0         | Unknown   |    |
| Untested Somatic | NA    | NA      | WXS    | none    | 0        | 0         |           |    |
| Illumina_NextSeq | NA    | NA      | NA     | c.A132C | NA       | p.A44A    | NM_177938 |    |
|                  | exon1 | 0       | 0      | 0       | 0        | 0         | 0         | NA |
|                  | NA    | NA      | NA     | NA      | NA       | NA        | NA        | NA |
|                  | NA    | NA      | NA     | NA      | NA       | NA        | NA        | NA |
|                  | NA    | NA      | NA     | NA      | NA       | NA        | NA        | NA |
|                  | NA    | NA      | NA     | NA      | NA       | NA        | NA        | 0  |
|                  | NA    | NA      | NA     | NA      | NA       | NA        | 0         | 0  |
|                  | NA    | NA      | NA     | NA      | NA       | NA        | NA        | NA |
|                  | NA    | NA      | NA     | NA      | NA       | NA        | NA        | NA |
|                  | NA    | NA      | NA     | NA      | NA       | NA        | NA        | NA |
|                  | NA    | NA      | NA     | NA      | NA       | NA        | NA        | 0  |
| Unknown          | NA    | Moffitt | hs37d5 | 3       | 51198242 | 51198242+ |           | 0  |
|                  | SNP   | T       | T      | G       | novel    | none      | MOF-AM5   | NA |
|                  | 0     | 0       | 0      | 0       | 0        | 0         | Unknown   |    |
| Untested Somatic | NA    | NA      | WXS    | none    | 0        | 0         |           |    |
| Illumina_NextSeq | NA    | NA      | NA     | 0       | NA       | 0         | 0         | 0  |
|                  | 0     | 0       | 0      | 0       | 0        | 0         | NA        | NA |
|                  | NA    | NA      | NA     | NA      | NA       | NA        | NA        | NA |
|                  | NA    | NA      | NA     | NA      | NA       | NA        | NA        | NA |
|                  | NA    | NA      | NA     | NA      | NA       | NA        | NA        | NA |
|                  | NA    | NA      | NA     | NA      | NA       | NA        | 0         | NA |
|                  | NA    | NA      | NA     | NA      | NA       | 0         | 0         | NA |
|                  | NA    | NA      | NA     | NA      | NA       | NA        | NA        | NA |
|                  | NA    | NA      | NA     | NA      | NA       | NA        | NA        | NA |
|                  | NA    | NA      | NA     | NA      | NA       | NA        | NA        | NA |
|                  | NA    | NA      | NA     | NA      | NA       | NA        | 0         |    |
| ABHD14B          | NA    | Moffitt | hs37d5 | 3       | 52003514 | 52003514+ |           |    |
| Silent           | SNP   | C       | C      | G       | novel    | none      | MOF-MA1   | NA |
|                  | 0     | 0       | 0      | 0       | 0        | 0         | Unknown   |    |
| Untested Somatic | NA    | NA      | WXS    | none    | 0        | 0         |           |    |
| Illumina_NextSeq | NA    | NA      | NA     | c.G561C | NA       | p.G187G   |           |    |
| NM_001146314     | exon4 | 0       | 0      | 0       | 0        | 0         | 0         | 0  |





|         |                  |          |         |    |           |      |           |    |
|---------|------------------|----------|---------|----|-----------|------|-----------|----|
|         | NA               | NA       | NA      | NA | NA        | NA   | NA        | NA |
|         | NA               | NA       | NA      | NA | NA        | NA   | NA        | NA |
|         | NA               | NA       | 0       |    |           |      |           |    |
| Unknown | NA               | Moffitt  | hs37d5  | 3  | 119526061 |      | 119526061 |    |
|         | +                | 0        | SNP     | T  | T         | G    | novel     |    |
| none    | MOF-MA1          | NA       | 0       | 0  | 0         | 0    | 0         | 0  |
|         | Unknown          | Untested | Somatic | NA | WXS       | none | 0         | 0  |
|         | Illumina_NextSeq | NA       | NA      | NA | 0         | NA   | 0         | 0  |
|         | 0                | 0        | 0       | 0  | 0         | 0    | 0         | NA |
|         | NA               | NA       | NA      | NA | NA        | NA   | NA        | NA |
|         | NA               | NA       | NA      | NA | NA        | NA   | NA        | NA |
|         | NA               | NA       | NA      | NA | NA        | NA   | NA        | NA |
|         | NA               | NA       | NA      | NA | NA        | NA   | NA        | 0  |
|         | NA               | NA       | NA      | NA | NA        | NA   | 0         | 0  |
|         | NA               | NA       | NA      | NA | NA        | NA   | NA        | NA |
|         | NA               | NA       | NA      | NA | NA        | NA   | NA        | NA |
|         | NA               | NA       | NA      | NA | NA        | NA   | NA        | NA |
|         | NA               | NA       | NA      | NA | NA        | NA   | NA        | 0  |
| Unknown | NA               | Moffitt  | hs37d5  | 3  | 119892352 |      | 119892352 |    |
|         | +                | 0        | SNP     | T  | T         | C    | novel     |    |
| none    | MOF-AM2          | NA       | 0       | 0  | 0         | 0    | 0         | 0  |
|         | Unknown          | Untested | Somatic | NA | WXS       | none | 0         | 0  |
|         | Illumina_NextSeq | NA       | NA      | NA | 0         | NA   | 0         | 0  |
|         | 0                | 0        | 0       | 0  | 0         | 0    | 0         | NA |
|         | NA               | NA       | NA      | NA | NA        | NA   | NA        | NA |
|         | NA               | NA       | NA      | NA | NA        | NA   | NA        | NA |
|         | NA               | NA       | NA      | NA | NA        | NA   | NA        | NA |
|         | NA               | NA       | NA      | NA | NA        | NA   | NA        | 0  |
|         | NA               | NA       | NA      | NA | NA        | NA   | 0         | 0  |
|         | NA               | NA       | NA      | NA | NA        | NA   | NA        | NA |
|         | NA               | NA       | NA      | NA | NA        | NA   | NA        | NA |
|         | NA               | NA       | NA      | NA | NA        | NA   | NA        | NA |
|         | NA               | NA       | NA      | NA | NA        | NA   | NA        | 0  |
| Unknown | NA               | Moffitt  | hs37d5  | 3  | 121258267 |      | 121258267 |    |
|         | +                | 0        | SNP     | C  | C         | G    | novel     |    |
| none    | MOF-AM2          | NA       | 0       | 0  | 0         | 0    | 0         | 0  |
|         | Unknown          | Untested | Somatic | NA | WXS       | none | 0         | 0  |
|         | Illumina_NextSeq | NA       | NA      | NA | 0         | NA   | 0         | 0  |
|         | 0                | 0        | 0       | 0  | 0         | 0    | 0         | NA |
|         | NA               | NA       | NA      | NA | NA        | NA   | NA        | NA |
|         | NA               | NA       | NA      | NA | NA        | NA   | NA        | NA |
|         | NA               | NA       | NA      | NA | NA        | NA   | NA        | NA |
|         | NA               | NA       | NA      | NA | NA        | NA   | NA        | 0  |
|         | NA               | NA       | NA      | NA | NA        | NA   | 0         | 0  |
|         | NA               | NA       | NA      | NA | NA        | NA   | NA        | NA |
|         | NA               | NA       | NA      | NA | NA        | NA   | NA        | NA |
|         | NA               | NA       | NA      | NA | NA        | NA   | NA        | NA |
|         | NA               | NA       | NA      | NA | NA        | NA   | NA        | 0  |
| Unknown | NA               | Moffitt  | hs37d5  | 3  | 123135121 |      | 123135121 |    |
|         | +                | 0        | SNP     | G  | G         | A    | novel     |    |



|                   |                  |                   |                  |          |           |      |           |    |
|-------------------|------------------|-------------------|------------------|----------|-----------|------|-----------|----|
|                   | NA               | NA                | NA               | NA       | NA        | NA   | NA        | NA |
|                   | NA               | NA                | NA               | NA       | NA        | NA   | NA        | NA |
|                   | NA               | NA                | NA               | NA       | NA        | NA   | NA        | 0  |
|                   | NA               | NA                | NA               | NA       | NA        | NA   | 0         | 0  |
|                   | NA               | NA                | NA               | NA       | NA        | NA   | NA        | NA |
|                   | NA               | NA                | NA               | NA       | NA        | NA   | NA        | NA |
|                   | NA               | NA                | NA               | NA       | NA        | NA   | NA        | NA |
|                   | NA               | NA                | NA               | NA       | NA        | NA   | NA        | 0  |
| EPHB1             | NA               | Moffitt           | hs37d5           | 3        | 134670416 |      | 134670416 |    |
|                   | +                | Silent            | SNP              | C        | C         | A    | novel     |    |
| none              | MOF-AM2          | NA                | 0                | 0        | 0         | 0    | 0         | 0  |
|                   | Unknown          | Untested          | Somatic          | NA       | WXS       | none | 0         | 0  |
|                   | Illumina_NextSeq | NA                | NA               | NA       | c.C327A   | NA   | p.T109T   |    |
| NM_004441         |                  | exon3             | 0                | 0        | 0         | 0    | 0         | 0  |
|                   | NA               | NA                | NA               | NA       | NA        | NA   | NA        | NA |
|                   | NA               | NA                | NA               | NA       | NA        | NA   | NA        | NA |
|                   | NA               | NA                | NA               | NA       | NA        | NA   | NA        | NA |
|                   | NA               | NA                | NA               | NA       | NA        | NA   | NA        | NA |
|                   | 0                | NA                | NA               | NA       | NA        | NA   | NA        | 0  |
|                   | 0                | NA                | NA               | NA       | NA        | NA   | NA        | NA |
|                   | NA               | NA                | NA               | NA       | NA        | NA   | NA        | NA |
|                   | NA               | NA                | NA               | NA       | NA        | NA   | NA        | NA |
|                   | NA               | NA                | NA               | NA       | NA        | NA   | NA        | NA |
|                   | 0                |                   |                  |          |           |      |           |    |
| Unknown           | NA               | Moffitt           | hs37d5           | 3        | 140281824 |      | 140281824 |    |
|                   | +                | 0                 | SNP              | G        | G         | A    | novel     |    |
| none              | MOF-MA1          | NA                | 0                | 0        | 0         | 0    | 0         | 0  |
|                   | Unknown          | Untested          | Somatic          | NA       | WXS       | none | 0         | 0  |
|                   | Illumina_NextSeq | NA                | NA               | NA       | 0         | NA   | 0         | 0  |
|                   | 0                | 0                 | 0                | 0        | 0         | 0    | 0         | NA |
|                   | NA               | NA                | NA               | NA       | NA        | NA   | NA        | NA |
|                   | NA               | NA                | NA               | NA       | NA        | NA   | NA        | NA |
|                   | NA               | NA                | NA               | NA       | NA        | NA   | NA        | NA |
|                   | NA               | NA                | NA               | NA       | NA        | NA   | NA        | 0  |
|                   | NA               | NA                | NA               | NA       | NA        | NA   | 0         | 0  |
|                   | NA               | NA                | NA               | NA       | NA        | NA   | NA        | NA |
|                   | NA               | NA                | NA               | NA       | NA        | NA   | NA        | NA |
|                   | NA               | NA                | NA               | NA       | NA        | NA   | NA        | NA |
|                   | NA               | NA                | NA               | NA       | NA        | NA   | NA        | 0  |
| MED12L            | NA               | Moffitt           | hs37d5           | 3        | 150883693 |      | 150883693 |    |
|                   | +                | Missense_Mutation |                  |          | SNP       | G    | G         | C  |
|                   | novel            | none              | MOF-MA1          | NA       | 0         | 0    | 0         | 0  |
|                   | 0                | 0                 | Unknown          | Untested | Somatic   | NA   | WXS       |    |
| none              | 0                | 0                 | Illumina_NextSeq | NA       | NA        | NA   | c.G1418C  | NA |
|                   | p.R473P          | NM_053002         | exon10           | 0        | 0         | 0    | 0         | 0  |
|                   | 0                | 0                 | NA               | NA       | NA        | NA   | NA        | NA |
|                   | NA               | NA                | NA               | NA       | NA        | NA   | NA        | NA |
|                   | NA               | NA                | NA               | NA       | NA        | NA   | NA        | NA |
|                   | NA               | NA                | NA               | NA       | NA        | NA   | NA        | NA |
| probably_damaging |                  |                   | NA               | NA       | NA        | 0    | NA        | NA |





|           |                  |          |         |    |           |      |           |    |
|-----------|------------------|----------|---------|----|-----------|------|-----------|----|
|           | NA               | NA       | NA      | NA | NA        | NA   | NA        | NA |
|           | NA               | NA       | NA      | NA | NA        | NA   | NA        | NA |
|           | NA               | NA       | NA      | NA | NA        | 0    |           |    |
| Unknown   | NA               | Moffitt  | hs37d5  | 3  | 183854544 |      | 183854544 |    |
|           | +                | 0        | INS     | C  | C         | CGAA | novel     |    |
| none      | MOF-AM2          | NA       | 0       | 0  | 0         | 0    | 0         | 0  |
|           | Unknown          | Untested | Somatic | NA | WXS       | none | 0         | 0  |
|           | Illumina_NextSeq | NA       | NA      | NA | 0         | NA   | 0         | 0  |
|           | 0                | 0        | 0       | 0  | 0         | 0    | 0         | NA |
|           | NA               | NA       | NA      | NA | NA        | NA   | NA        | NA |
|           | NA               | NA       | NA      | NA | NA        | NA   | NA        | NA |
|           | NA               | NA       | NA      | NA | NA        | NA   | NA        | NA |
|           | NA               | NA       | NA      | NA | NA        | NA   | NA        | 0  |
|           | NA               | NA       | NA      | NA | NA        | NA   | 0         | 0  |
|           | NA               | NA       | NA      | NA | NA        | NA   | NA        | NA |
|           | NA               | NA       | NA      | NA | NA        | NA   | NA        | NA |
|           | NA               | NA       | NA      | NA | NA        | NA   | NA        | NA |
|           | NA               | NA       | NA      | NA | NA        | NA   | NA        | 0  |
| Unknown   | NA               | Moffitt  | hs37d5  | 3  | 184075133 |      | 184075133 |    |
|           | +                | 0        | SNP     | C  | C         | G    | novel     |    |
| none      | MOF-AM2          | NA       | 0       | 0  | 0         | 0    | 0         | 0  |
|           | Unknown          | Untested | Somatic | NA | WXS       | none | 0         | 0  |
|           | Illumina_NextSeq | NA       | NA      | NA | 0         | NA   | 0         | 0  |
|           | 0                | 0        | 0       | 0  | 0         | 0    | 0         | NA |
|           | NA               | NA       | NA      | NA | NA        | NA   | NA        | NA |
|           | NA               | NA       | NA      | NA | NA        | NA   | NA        | NA |
|           | NA               | NA       | NA      | NA | NA        | NA   | NA        | NA |
|           | NA               | NA       | NA      | NA | NA        | NA   | NA        | 0  |
|           | NA               | NA       | NA      | NA | NA        | NA   | 0         | 0  |
|           | NA               | NA       | NA      | NA | NA        | NA   | NA        | NA |
|           | NA               | NA       | NA      | NA | NA        | NA   | NA        | NA |
|           | NA               | NA       | NA      | NA | NA        | NA   | NA        | NA |
|           | NA               | NA       | NA      | NA | NA        | NA   | NA        | 0  |
| CHRD      | NA               | Moffitt  | hs37d5  | 3  | 184099384 |      | 184099384 |    |
|           | +                | Silent   | SNP     | G  | G         | A    | novel     |    |
| none      | MOF-MA1          | NA       | 0       | 0  | 0         | 0    | 0         | 0  |
|           | Unknown          | Untested | Somatic | NA | WXS       | none | 0         | 0  |
|           | Illumina_NextSeq | NA       | NA      | NA | c.G483A   | NA   | p.E161E   |    |
| NM_003741 | exon4            | 0        | 0       | 0  | 0         | 0    | 0         | 0  |
|           | NA               | NA       | NA      | NA | NA        | NA   | NA        | NA |
|           | NA               | NA       | NA      | NA | NA        | NA   | NA        | NA |
|           | NA               | NA       | NA      | NA | NA        | NA   | NA        | NA |
|           | NA               | NA       | NA      | NA | NA        | NA   | NA        | NA |
|           | 0                | NA       | NA      | NA | NA        | NA   | NA        | 0  |
|           | 0                | NA       | NA      | NA | NA        | NA   | NA        | NA |
|           | NA               | NA       | NA      | NA | NA        | NA   | NA        | NA |
|           | NA               | NA       | NA      | NA | NA        | NA   | NA        | NA |
|           | NA               | NA       | NA      | NA | NA        | NA   | NA        | NA |
|           | 0                |          |         |    |           |      |           |    |
| Unknown   | NA               | Moffitt  | hs37d5  | 3  | 184580665 |      | 184580665 |    |







|                  |         |         |         |          |          |          |           |         |
|------------------|---------|---------|---------|----------|----------|----------|-----------|---------|
| Unknown          | NA      | NA      | NA      | NA       | NA       | NA       | 0         |         |
| NA               | Moffitt | hs37d5  | 4       | 56235948 | 56235948 | +        | 0         |         |
| SNP              | C       | C       | G       | novel    | none     |          | MOF-MA1   | NA      |
| 0                | 0       | 0       | 0       | 0        | 0        |          | Unknown   |         |
| Untested Somatic | NA      | WXS     | none    | 0        | 0        |          |           |         |
| Illumina_NextSeq | NA      | NA      | 0       | NA       | 0        |          | 0         | 0       |
| 0                | 0       | 0       | 0       | 0        | 0        |          | NA        | NA      |
| NA               | NA      | NA      | NA      | NA       | NA       |          | NA        | NA      |
| NA               | NA      | NA      | NA      | NA       | NA       |          | NA        | NA      |
| NA               | NA      | NA      | NA      | NA       | NA       |          | NA        | NA      |
| NA               | NA      | NA      | NA      | NA       | NA       |          | 0         | NA      |
| NA               | NA      | NA      | NA      | NA       | NA       |          | 0         | NA      |
| NA               | NA      | NA      | NA      | NA       | NA       |          | NA        | NA      |
| NA               | NA      | NA      | NA      | NA       | NA       |          | NA        | NA      |
| NA               | NA      | NA      | NA      | NA       | NA       |          | NA        | NA      |
| NA               | NA      | NA      | NA      | NA       | NA       |          | 0         |         |
| UGT2A2           | NA      | Moffitt | hs37d5  | 4        | 70504792 | 70504792 | +         |         |
| Silent           | SNP     | C       | C       | T        | novel    | none     |           | MOF-AM5 |
| 0                | 0       | 0       | 0       | 0        | 0        |          | Unknown   | NA      |
| Untested Somatic | NA      | WXS     | none    | 0        | 0        |          |           |         |
| Illumina_NextSeq | NA      | NA      | c.G567A | NA       | p.E189E  |          |           |         |
| NM_001105677     | exon1   | 0       | 0       | 0        | 0        |          | 0         | 0       |
| NA               | NA      | NA      | NA      | NA       | NA       |          | NA        | NA      |
| NA               | NA      | NA      | NA      | NA       | NA       |          | NA        | NA      |
| NA               | NA      | NA      | NA      | NA       | NA       |          | NA        | NA      |
| NA               | NA      | NA      | NA      | NA       | NA       |          | NA        | NA      |
| 0                | NA      | NA      | NA      | NA       | NA       |          | NA        | 0       |
| 0                | NA      | NA      | NA      | NA       | NA       |          | NA        | NA      |
| NA               | NA      | NA      | NA      | NA       | NA       |          | NA        | NA      |
| NA               | NA      | NA      | NA      | NA       | NA       |          | NA        | NA      |
| NA               | NA      | NA      | NA      | NA       | NA       |          | NA        | NA      |
| 0                |         |         |         |          |          |          |           |         |
| SMR3B            | NA      | Moffitt | hs37d5  | 4        | 71255523 | 71255523 | +         |         |
| Silent           | SNP     | C       | C       | G        | novel    | none     |           | MOF-MA1 |
| 0                | 0       | 0       | 0       | 0        | 0        |          | Unknown   | NA      |
| Untested Somatic | NA      | WXS     | none    | 0        | 0        |          |           |         |
| Illumina_NextSeq | NA      | NA      | c.C198G | NA       | p.P66P   |          | NM_006685 |         |
| exon3            | 0       | 0       | 0       | 0        | 0        |          | 0         | NA      |
| NA               | NA      | NA      | NA      | NA       | NA       |          | NA        | NA      |
| NA               | NA      | NA      | NA      | NA       | NA       |          | NA        | NA      |
| NA               | NA      | NA      | NA      | NA       | NA       |          | NA        | NA      |
| NA               | NA      | NA      | NA      | NA       | NA       |          | NA        | 0       |
| NA               | NA      | NA      | NA      | NA       | NA       |          | 0         | 0       |
| NA               | NA      | NA      | NA      | NA       | NA       |          | NA        | NA      |
| NA               | NA      | NA      | NA      | NA       | NA       |          | NA        | NA      |
| NA               | NA      | NA      | NA      | NA       | NA       |          | NA        | NA      |
| NA               | NA      | NA      | NA      | NA       | NA       |          | NA        | 0       |
| Unknown          | NA      | Moffitt | hs37d5  | 4        | 71347807 | 71347807 | +         |         |
| SNP              | G       | G       | A       | novel    | none     |          |           | MOF-AM5 |
| 0                | 0       | 0       | 0       | 0        | 0        |          | Unknown   | NA      |





|                  |     |         |        |    |          |            |         |    |
|------------------|-----|---------|--------|----|----------|------------|---------|----|
|                  | NA  | NA      | NA     | NA | NA       | NA         | NA      | NA |
|                  | NA  | NA      | NA     | NA | NA       | NA         | NA      | NA |
|                  | NA  | NA      | NA     | NA | NA       | NA         | 0       |    |
| Unknown          | NA  | Moffitt | hs37d5 | 4  | 85694168 | 85694168 + |         | 0  |
|                  | SNP | G       | G      | C  | novel    | none       | MOF-MA1 | NA |
|                  | 0   | 0       | 0      | 0  | 0        | 0          | Unknown |    |
| Untested Somatic | NA  | WXS     | none   | 0  | 0        | 0          |         |    |
| Illumina_NextSeq | NA  | NA      | 0      | NA | 0        | 0          | 0       | 0  |
|                  | 0   | 0       | 0      | 0  | 0        | 0          | NA      | NA |
|                  | NA  | NA      | NA     | NA | NA       | NA         | NA      | NA |
|                  | NA  | NA      | NA     | NA | NA       | NA         | NA      | NA |
|                  | NA  | NA      | NA     | NA | NA       | NA         | NA      | NA |
|                  | NA  | NA      | NA     | NA | NA       | NA         | 0       | NA |
|                  | NA  | NA      | NA     | NA | NA       | 0          | 0       | NA |
|                  | NA  | NA      | NA     | NA | NA       | NA         | NA      | NA |
|                  | NA  | NA      | NA     | NA | NA       | NA         | NA      | NA |
|                  | NA  | NA      | NA     | NA | NA       | NA         | NA      | NA |
|                  | NA  | NA      | NA     | NA | NA       | NA         | NA      | NA |
|                  | NA  | NA      | NA     | NA | NA       | NA         | 0       | NA |
| Unknown          | NA  | Moffitt | hs37d5 | 4  | 86938314 | 86938314 + |         | 0  |
|                  | SNP | C       | C      | G  | novel    | none       | MOF-AM2 | NA |
|                  | 0   | 0       | 0      | 0  | 0        | 0          | Unknown |    |
| Untested Somatic | NA  | WXS     | none   | 0  | 0        | 0          |         |    |
| Illumina_NextSeq | NA  | NA      | 0      | NA | 0        | 0          | 0       | 0  |
|                  | 0   | 0       | 0      | 0  | 0        | 0          | NA      | NA |
|                  | NA  | NA      | NA     | NA | NA       | NA         | NA      | NA |
|                  | NA  | NA      | NA     | NA | NA       | NA         | NA      | NA |
|                  | NA  | NA      | NA     | NA | NA       | NA         | NA      | NA |
|                  | NA  | NA      | NA     | NA | NA       | NA         | 0       | NA |
|                  | NA  | NA      | NA     | NA | NA       | 0          | 0       | NA |
|                  | NA  | NA      | NA     | NA | NA       | NA         | NA      | NA |
|                  | NA  | NA      | NA     | NA | NA       | NA         | NA      | NA |
|                  | NA  | NA      | NA     | NA | NA       | NA         | NA      | NA |
|                  | NA  | NA      | NA     | NA | NA       | NA         | NA      | NA |
|                  | NA  | NA      | NA     | NA | NA       | NA         | 0       | NA |
| Unknown          | NA  | Moffitt | hs37d5 | 4  | 86938317 | 86938317 + |         | 0  |
|                  | SNP | C       | C      | T  | novel    | none       | MOF-AM2 | NA |
|                  | 0   | 0       | 0      | 0  | 0        | 0          | Unknown |    |
| Untested Somatic | NA  | WXS     | none   | 0  | 0        | 0          |         |    |
| Illumina_NextSeq | NA  | NA      | 0      | NA | 0        | 0          | 0       | 0  |
|                  | 0   | 0       | 0      | 0  | 0        | 0          | NA      | NA |
|                  | NA  | NA      | NA     | NA | NA       | NA         | NA      | NA |
|                  | NA  | NA      | NA     | NA | NA       | NA         | NA      | NA |
|                  | NA  | NA      | NA     | NA | NA       | NA         | NA      | NA |
|                  | NA  | NA      | NA     | NA | NA       | NA         | 0       | NA |
|                  | NA  | NA      | NA     | NA | NA       | 0          | 0       | NA |
|                  | NA  | NA      | NA     | NA | NA       | NA         | NA      | NA |
|                  | NA  | NA      | NA     | NA | NA       | NA         | NA      | NA |
|                  | NA  | NA      | NA     | NA | NA       | NA         | NA      | NA |
|                  | NA  | NA      | NA     | NA | NA       | NA         | NA      | NA |
|                  | NA  | NA      | NA     | NA | NA       | NA         | 0       | NA |
| Unknown          | NA  | Moffitt | hs37d5 | 4  | 87809446 | 87809446 + |         | 0  |
|                  | SNP | T       | T      | G  | novel    | none       | MOF-MA1 | NA |









|                   |                  |                   |                  |          |           |      |           |    |
|-------------------|------------------|-------------------|------------------|----------|-----------|------|-----------|----|
|                   | NA               | NA                | NA               | NA       | NA        | NA   | NA        | NA |
|                   | NA               | NA                | NA               | NA       | NA        | NA   | NA        | NA |
|                   | NA               | NA                | 0                |          |           |      |           |    |
| TKTL2             | NA               | Moffitt           | hs37d5           | 4        | 164393833 |      | 164393833 |    |
|                   | +                | Missense_Mutation |                  |          | SNP       | A    | A         | G  |
|                   | novel            | none              | MOF-MA1          | NA       | 0         | 0    | 0         | 0  |
|                   | 0                | 0                 | Unknown          | Untested | Somatic   | NA   | WXS       |    |
| none              | 0                | 0                 | Illumina_NextSeq | NA       | NA        | NA   | c.T1054C  | NA |
|                   | p.S352P          | NM_032136         | exon1            | 0        | 0         | 0    | 0         | 0  |
|                   | 0                | 0                 | NA               | NA       | NA        | NA   | NA        | NA |
|                   | NA               | NA                | NA               | NA       | NA        | NA   | NA        | NA |
|                   | NA               | NA                | NA               | NA       | NA        | NA   | NA        | NA |
|                   | NA               | NA                | NA               | NA       | NA        | NA   | NA        | NA |
| probably_damaging |                  |                   | NA               | NA       | NA        | 0    | NA        | NA |
|                   | NA               | NA                | NA               | NA       | 0         | 0    | NA        | NA |
|                   | NA               | NA                | NA               | NA       | NA        | NA   | NA        | NA |
|                   | NA               | NA                | NA               | NA       | NA        | NA   | NA        | NA |
|                   | NA               | NA                | NA               | NA       | NA        | NA   | NA        | NA |
|                   | NA               | NA                | NA               | NA       | NA        | 0    |           |    |
| Unknown           | NA               | Moffitt           | hs37d5           | 4        | 165118897 |      | 165118897 |    |
|                   | +                | 0                 | SNP              | C        | C         | G    | novel     |    |
| none              | MOF-MA1          | NA                | 0                | 0        | 0         | 0    | 0         | 0  |
|                   | Unknown          | Untested          | Somatic          | NA       | WXS       | none | 0         | 0  |
|                   | Illumina_NextSeq | NA                | NA               | NA       | 0         | NA   | 0         | 0  |
|                   | 0                | 0                 | 0                | 0        | 0         | 0    | 0         | NA |
|                   | NA               | NA                | NA               | NA       | NA        | NA   | NA        | NA |
|                   | NA               | NA                | NA               | NA       | NA        | NA   | NA        | NA |
|                   | NA               | NA                | NA               | NA       | NA        | NA   | NA        | NA |
|                   | NA               | NA                | NA               | NA       | NA        | NA   | NA        | 0  |
|                   | NA               | NA                | NA               | NA       | NA        | NA   | 0         | 0  |
|                   | NA               | NA                | NA               | NA       | NA        | NA   | NA        | NA |
|                   | NA               | NA                | NA               | NA       | NA        | NA   | NA        | NA |
|                   | NA               | NA                | NA               | NA       | NA        | NA   | NA        | NA |
|                   | NA               | NA                | NA               | NA       | NA        | NA   | NA        | 0  |
| CLCN3             | NA               | Moffitt           | hs37d5           | 4        | 170641075 |      | 170641075 |    |
|                   | +                | Nonsense_Mutation |                  |          | SNP       | T    | T         | G  |
|                   | novel            | none              | MOF-MA1          | NA       | 0         | 0    | 0         | 0  |
|                   | 0                | 0                 | Unknown          | Untested | Somatic   | NA   | WXS       |    |
| none              | 0                | 0                 | Illumina_NextSeq | NA       | NA        | NA   | c.T2460G  | NA |
|                   | p.Y820X          | NM_173872         | exon14           | 0        | 0         | 0    | 0         | 0  |
|                   | 0                | 0                 | NA               | NA       | NA        | NA   | NA        | NA |
|                   | NA               | NA                | NA               | NA       | NA        | NA   | NA        | NA |
|                   | NA               | NA                | NA               | NA       | NA        | NA   | NA        | NA |
|                   | NA               | NA                | NA               | NA       | NA        | NA   | NA        | NA |
| possibly_damaging |                  |                   | NA               | NA       | NA        | 0    | NA        | NA |
|                   | NA               | NA                | NA               | NA       | 0         | 0    | NA        | NA |
|                   | NA               | NA                | NA               | NA       | NA        | NA   | NA        | NA |
|                   | NA               | NA                | NA               | NA       | NA        | NA   | NA        | NA |
|                   | NA               | NA                | NA               | NA       | NA        | NA   | NA        | NA |
|                   | NA               | NA                | NA               | NA       | NA        | 0    |           |    |

|                   |                  |          |         |      |                   |           |         |    |
|-------------------|------------------|----------|---------|------|-------------------|-----------|---------|----|
| Unknown           | NA               | Moffitt  | hs37d5  | 4    | 189026264         | 189026264 |         |    |
|                   | +                | 0        | SNP     | G    | G                 | C         | novel   |    |
| none              | MOF-AM2          | NA       | 0       | 0    | 0                 | 0         | 0       | 0  |
|                   | Unknown          | Untested | Somatic | NA   | WXS               | none      | 0       | 0  |
|                   | Illumina_NextSeq | NA       | NA      | 0    | 0                 | 0         | 0       | NA |
|                   | 0                | 0        | 0       | 0    | 0                 | 0         | 0       | NA |
|                   | NA               | NA       | NA      | NA   | NA                | NA        | NA      | NA |
|                   | NA               | NA       | NA      | NA   | NA                | NA        | NA      | NA |
|                   | NA               | NA       | NA      | NA   | NA                | NA        | NA      | NA |
|                   | NA               | NA       | NA      | NA   | NA                | NA        | NA      | 0  |
|                   | NA               | NA       | NA      | NA   | NA                | NA        | 0       | 0  |
|                   | NA               | NA       | NA      | NA   | NA                | NA        | NA      | NA |
|                   | NA               | NA       | NA      | NA   | NA                | NA        | NA      | NA |
|                   | NA               | NA       | NA      | NA   | NA                | NA        | NA      | NA |
|                   | NA               | NA       | NA      | NA   | NA                | NA        | NA      | 0  |
| Unknown           | NA               | Moffitt  | hs37d5  | 5    | 376618            | 376618    | +       | 0  |
|                   | SNP              | G        | G       | A    | novel             | none      | MOF-MA1 | NA |
|                   | 0                | 0        | 0       | 0    | 0                 | 0         | Unknown |    |
| Untested          | Somatic          | NA       | WXS     | none | 0                 | 0         |         |    |
| Illumina_NextSeq  | NA               | NA       | 0       | 0    | NA                | 0         | 0       | 0  |
|                   | 0                | 0        | 0       | 0    | 0                 | 0         | NA      | NA |
|                   | NA               | NA       | NA      | NA   | NA                | NA        | NA      | NA |
|                   | NA               | NA       | NA      | NA   | NA                | NA        | NA      | NA |
|                   | NA               | NA       | NA      | NA   | NA                | NA        | NA      | NA |
|                   | NA               | NA       | NA      | NA   | NA                | NA        | 0       | NA |
|                   | NA               | NA       | NA      | NA   | NA                | 0         | 0       | NA |
|                   | NA               | NA       | NA      | NA   | NA                | NA        | NA      | NA |
|                   | NA               | NA       | NA      | NA   | NA                | NA        | NA      | NA |
|                   | NA               | NA       | NA      | NA   | NA                | NA        | NA      | NA |
|                   | NA               | NA       | NA      | NA   | NA                | NA        | NA      | NA |
|                   | NA               | NA       | NA      | NA   | NA                | NA        | 0       |    |
| TPPP              | NA               | Moffitt  | hs37d5  | 5    | 678031            | 678031    | +       |    |
| Missense_Mutation |                  |          | SNP     | T    | T                 | C         | novel   |    |
| none              | MOF-MA1          | NA       | 0       | 0    | 0                 | 0         | 0       | 0  |
|                   | Unknown          | Untested | Somatic | NA   | WXS               | none      | 0       | 0  |
|                   | Illumina_NextSeq | NA       | NA      | 0    | c.A145G           | NA        | p.S49G  |    |
| NM_007030         | exon2            | 0        | 0       | 0    | 0                 | 0         | 0       | 0  |
|                   | NA               | NA       | NA      | NA   | NA                | NA        | NA      | NA |
|                   | NA               | NA       | NA      | NA   | NA                | NA        | NA      | NA |
|                   | NA               | NA       | NA      | NA   | NA                | NA        | NA      | NA |
|                   | NA               | NA       | NA      | NA   | possibly_damaging |           |         | NA |
|                   | NA               | NA       | 0       | NA   | NA                | NA        | NA      | NA |
|                   | NA               | 0        | 0       | NA   | NA                | NA        | NA      | NA |
|                   | NA               | NA       | NA      | NA   | NA                | NA        | NA      | NA |
|                   | NA               | NA       | NA      | NA   | NA                | NA        | NA      | NA |
|                   | NA               | NA       | NA      | NA   | NA                | NA        | NA      | NA |
|                   | NA               | NA       | 0       | NA   | NA                | NA        | NA      | NA |
| Unknown           | NA               | Moffitt  | hs37d5  | 5    | 796097            | 796097    | +       | 0  |
|                   | SNP              | T        | T       | G    | novel             | none      | MOF-MA1 | NA |
|                   | 0                | 0        | 0       | 0    | 0                 | 0         | Unknown |    |
| Untested          | Somatic          | NA       | WXS     | none | 0                 | 0         |         |    |





|                   |                  |          |         |    |                   |          |         |    |
|-------------------|------------------|----------|---------|----|-------------------|----------|---------|----|
|                   | NA               | NA       | NA      | NA | NA                | NA       | NA      | NA |
|                   | NA               | NA       | NA      | NA | NA                | NA       | NA      | 0  |
| HEATR7B2          | NA               | Moffitt  | hs37d5  | 5  | 41048460          | 41048460 | +       |    |
| Missense_Mutation |                  |          | SNP     | T  | T                 | A        | novel   |    |
| none              | MOF-AM2          | NA       | 0       | 0  | 0                 | 0        | 0       | 0  |
|                   | Unknown          | Untested | Somatic | NA | WXS               | none     | 0       | 0  |
|                   | Illumina_NextSeq | NA       | NA      | NA | c.A1650T          | NA       | p.K550N |    |
| NM_173489         | exon16           | 0        | 0       | 0  | 0                 | 0        | 0       | 0  |
|                   | NA               | NA       | NA      | NA | NA                | NA       | NA      | NA |
|                   | NA               | NA       | NA      | NA | NA                | NA       | NA      | NA |
|                   | NA               | NA       | NA      | NA | NA                | NA       | NA      | NA |
|                   | NA               | NA       | NA      | NA | NA                | NA       | NA      | NA |
|                   | 0                | NA       | NA      | NA | NA                | NA       | NA      | 0  |
|                   | 0                | NA       | NA      | NA | NA                | NA       | NA      | NA |
|                   | NA               | NA       | NA      | NA | NA                | NA       | NA      | NA |
|                   | NA               | NA       | NA      | NA | NA                | NA       | NA      | NA |
|                   | NA               | NA       | NA      | NA | NA                | NA       | NA      | NA |
|                   | 0                |          |         |    |                   |          |         |    |
| Unknown           | NA               | Moffitt  | hs37d5  | 5  | 41051040          | 41051040 | +       | 0  |
|                   | SNP              | G        | G       | C  | novel             | none     | MOF-MA1 | NA |
|                   | 0                | 0        | 0       | 0  | 0                 | 0        | Unknown |    |
| Untested Somatic  | NA               | WXS      | none    | 0  | 0                 | 0        |         |    |
| Illumina_NextSeq  | NA               | NA       | 0       | NA | 0                 | 0        | NA      | 0  |
|                   | 0                | 0        | 0       | 0  | 0                 | 0        | NA      | NA |
|                   | NA               | NA       | NA      | NA | NA                | NA       | NA      | NA |
|                   | NA               | NA       | NA      | NA | NA                | NA       | NA      | NA |
|                   | NA               | NA       | NA      | NA | NA                | NA       | NA      | NA |
|                   | NA               | NA       | NA      | NA | NA                | NA       | 0       | NA |
|                   | NA               | NA       | NA      | NA | NA                | 0        | 0       | NA |
|                   | NA               | NA       | NA      | NA | NA                | NA       | NA      | NA |
|                   | NA               | NA       | NA      | NA | NA                | NA       | NA      | NA |
|                   | NA               | NA       | NA      | NA | NA                | NA       | NA      | NA |
|                   | NA               | NA       | NA      | NA | NA                | NA       | 0       |    |
| C5orf51           | NA               | Moffitt  | hs37d5  | 5  | 41907944          | 41907944 | +       |    |
| Missense_Mutation |                  |          | SNP     | G  | G                 | C        | novel   |    |
| none              | MOF-MA1          | NA       | 0       | 0  | 0                 | 0        | 0       | 0  |
|                   | Unknown          | Untested | Somatic | NA | WXS               | none     | 0       | 0  |
|                   | Illumina_NextSeq | NA       | NA      | NA | c.G207C           | NA       | p.Q69H  |    |
| NM_175921         | exon2            | 0        | 0       | 0  | 0                 | 0        | 0       | 0  |
|                   | NA               | NA       | NA      | NA | NA                | NA       | NA      | NA |
|                   | NA               | NA       | NA      | NA | NA                | NA       | NA      | NA |
|                   | NA               | NA       | NA      | NA | NA                | NA       | NA      | NA |
|                   | NA               | NA       | NA      | NA | probably_damaging |          |         | NA |
|                   | NA               | NA       | 0       | NA | NA                | NA       | NA      | NA |
|                   | NA               | 0        | 0       | NA | NA                | NA       | NA      | NA |
|                   | NA               | NA       | NA      | NA | NA                | NA       | NA      | NA |
|                   | NA               | NA       | NA      | NA | NA                | NA       | NA      | NA |
|                   | NA               | NA       | NA      | NA | NA                | NA       | NA      | NA |
|                   | NA               | NA       | 0       |    |                   |          |         |    |
| Unknown           | NA               | Moffitt  | hs37d5  | 5  | 64510104          | 64510104 | +       | 0  |



|                   |                  |                  |        |         |                   |            |           |    |
|-------------------|------------------|------------------|--------|---------|-------------------|------------|-----------|----|
|                   | SNP              | C                | C      | G       | novel             | none       | MOF-AM2   | NA |
|                   | 0                | 0                | 0      | 0       | 0                 | 0          | Unknown   |    |
| Untested Somatic  | NA               | NA               | WXS    | none    | 0                 | 0          |           |    |
| Illumina_NextSeq  | NA               | NA               | NA     | 0       | NA                | 0          | 0         | 0  |
|                   | 0                | 0                | 0      | 0       | 0                 | 0          | NA        | NA |
|                   | NA               | NA               | NA     | NA      | NA                | NA         | NA        | NA |
|                   | NA               | NA               | NA     | NA      | NA                | NA         | NA        | NA |
|                   | NA               | NA               | NA     | NA      | NA                | NA         | NA        | NA |
|                   | NA               | NA               | NA     | NA      | NA                | NA         | 0         | NA |
|                   | NA               | NA               | NA     | NA      | NA                | 0          | 0         | NA |
|                   | NA               | NA               | NA     | NA      | NA                | NA         | NA        | NA |
|                   | NA               | NA               | NA     | NA      | NA                | NA         | NA        | NA |
|                   | NA               | NA               | NA     | NA      | NA                | NA         | NA        | NA |
|                   | NA               | NA               | NA     | NA      | NA                | NA         | NA        | NA |
|                   | NA               | NA               | NA     | NA      | NA                | NA         | NA        | NA |
|                   | NA               | NA               | NA     | NA      | NA                | NA         | 0         |    |
| AGGF1             | NA               | Moffitt          | hs37d5 | 5       | 76331448          | 76331448 + |           |    |
| Silent            | SNP              | C                | C      | T       | novel             | none       | MOF-AM2   | NA |
|                   | 0                | 0                | 0      | 0       | 0                 | 0          | Unknown   |    |
| Untested Somatic  | NA               | NA               | WXS    | none    | 0                 | 0          |           |    |
| Illumina_NextSeq  | NA               | NA               | NA     | c.C396T | NA                | p.I132I    | NM_018046 |    |
|                   | exon3            | 0                | 0      | 0       | 0                 | 0          | 0         | NA |
|                   | NA               | NA               | NA     | NA      | NA                | NA         | NA        | NA |
|                   | NA               | NA               | NA     | NA      | NA                | NA         | NA        | NA |
|                   | NA               | NA               | NA     | NA      | NA                | NA         | NA        | NA |
|                   | NA               | NA               | NA     | NA      | NA                | NA         | NA        | 0  |
|                   | NA               | NA               | NA     | NA      | NA                | NA         | 0         | 0  |
|                   | NA               | NA               | NA     | NA      | NA                | NA         | NA        | NA |
|                   | NA               | NA               | NA     | NA      | NA                | NA         | NA        | NA |
|                   | NA               | NA               | NA     | NA      | NA                | NA         | NA        | NA |
|                   | NA               | NA               | NA     | NA      | NA                | NA         | NA        | NA |
|                   | NA               | NA               | NA     | NA      | NA                | NA         | NA        | 0  |
| ZFYVE16           | NA               | Moffitt          | hs37d5 | 5       | 79746336          | 79746336 + |           |    |
| Missense_Mutation |                  |                  | SNP    | C       | C                 | T          | novel     |    |
| none              | MOF-MA1          | NA               | 0      | 0       | 0                 | 0          | 0         | 0  |
|                   | Unknown          | Untested Somatic | NA     | NA      | WXS               | none       | 0         | 0  |
|                   | Illumina_NextSeq | NA               | NA     | NA      | c.C3313T          | NA         | p.P1105S  |    |
| NM_001105251      | exon10           | 0                | 0      | 0       | 0                 | 0          | 0         | 0  |
|                   | NA               | NA               | NA     | NA      | NA                | NA         | NA        | NA |
|                   | NA               | NA               | NA     | NA      | NA                | NA         | NA        | NA |
|                   | NA               | NA               | NA     | NA      | NA                | NA         | NA        | NA |
|                   | NA               | NA               | NA     | NA      | probably_damaging |            |           | NA |
|                   | NA               | NA               | 0      | NA      | NA                | NA         | NA        | NA |
|                   | NA               | 0                | 0      | NA      | NA                | NA         | NA        | NA |
|                   | NA               | NA               | NA     | NA      | NA                | NA         | NA        | NA |
|                   | NA               | NA               | NA     | NA      | NA                | NA         | NA        | NA |
|                   | NA               | NA               | NA     | NA      | NA                | NA         | NA        | NA |
|                   | NA               | NA               | NA     | NA      | NA                | NA         | NA        | NA |
|                   | NA               | NA               | 0      |         |                   |            |           |    |
| HAPLN1            | NA               | Moffitt          | hs37d5 | 5       | 82937498          | 82937498 + |           |    |
| Silent            | SNP              | A                | A      | C       | novel             | none       | MOF-AM2   | NA |
|                   | 0                | 0                | 0      | 0       | 0                 | 0          | Unknown   |    |
| Untested Somatic  | NA               | NA               | WXS    | none    | 0                 | 0          |           |    |
| Illumina_NextSeq  | NA               | NA               | NA     | c.T882G | NA                | p.A294A    | NM_001884 |    |





|                   |                  |                   |                  |          |           |      |           |    |
|-------------------|------------------|-------------------|------------------|----------|-----------|------|-----------|----|
|                   | NA               | NA                | NA               | NA       | NA        | NA   | NA        | 0  |
| Unknown           | NA               | Moffitt           | hs37d5           | 5        | 140614728 |      | 140614728 |    |
|                   | +                | 0                 | SNP              | G        | G         | A    | novel     |    |
| none              | MOF-AM2          | NA                | 0                | 0        | 0         | 0    | 0         | 0  |
|                   | Unknown          | Untested          | Somatic          | NA       | WXS       | none | 0         | 0  |
|                   | Illumina_NextSeq | NA                | NA               | NA       | 0         | NA   | 0         | 0  |
|                   | 0                | 0                 | 0                | 0        | 0         | 0    | 0         | NA |
|                   | NA               | NA                | NA               | NA       | NA        | NA   | NA        | NA |
|                   | NA               | NA                | NA               | NA       | NA        | NA   | NA        | NA |
|                   | NA               | NA                | NA               | NA       | NA        | NA   | NA        | NA |
| 0.0018            | NA               | NA                | NA               | NA       | NA        | NA   | 0         | 0  |
|                   | NA               | NA                | NA               | NA       | NA        | NA   | NA        | NA |
|                   | NA               | NA                | NA               | NA       | NA        | NA   | NA        | NA |
|                   | NA               | NA                | NA               | NA       | NA        | NA   | NA        | NA |
|                   | NA               | NA                | NA               | NA       | NA        | NA   | NA        | 0  |
| Unknown           | NA               | Moffitt           | hs37d5           | 5        | 146764078 |      | 146764078 |    |
|                   | +                | 0                 | SNP              | G        | G         | C    | novel     |    |
| none              | MOF-AM5          | NA                | 0                | 0        | 0         | 0    | 0         | 0  |
|                   | Unknown          | Untested          | Somatic          | NA       | WXS       | none | 0         | 0  |
|                   | Illumina_NextSeq | NA                | NA               | NA       | 0         | NA   | 0         | 0  |
|                   | 0                | 0                 | 0                | 0        | 0         | 0    | 0         | NA |
|                   | NA               | NA                | NA               | NA       | NA        | NA   | NA        | NA |
|                   | NA               | NA                | NA               | NA       | NA        | NA   | NA        | NA |
|                   | NA               | NA                | NA               | NA       | NA        | NA   | NA        | NA |
|                   | NA               | NA                | NA               | NA       | NA        | NA   | NA        | 0  |
|                   | NA               | NA                | NA               | NA       | NA        | NA   | 0         | 0  |
|                   | NA               | NA                | NA               | NA       | NA        | NA   | NA        | NA |
|                   | NA               | NA                | NA               | NA       | NA        | NA   | NA        | NA |
|                   | NA               | NA                | NA               | NA       | NA        | NA   | NA        | NA |
|                   | NA               | NA                | NA               | NA       | NA        | NA   | NA        | 0  |
| DPYSL3            | NA               | Moffitt           | hs37d5           | 5        | 146773620 |      | 146773620 |    |
|                   | +                | Missense_Mutation |                  |          | SNP       | G    | G         | C  |
|                   | novel            | none              | MOF-AM5          | NA       | 0         | 0    | 0         | 0  |
|                   | 0                | 0                 | Unknown          | Untested | Somatic   | NA   | WXS       |    |
| none              | 0                | 0                 | Illumina_NextSeq | NA       | NA        |      | c.C2033G  | NA |
|                   | p.S678C          | NM_001197294      | exon14           | 0        | 0         | 0    | 0         | 0  |
|                   | 0                | 0                 | NA               | NA       | NA        | NA   | NA        | NA |
|                   | NA               | NA                | NA               | NA       | NA        | NA   | NA        | NA |
|                   | NA               | NA                | NA               | NA       | NA        | NA   | NA        | NA |
|                   | NA               | NA                | NA               | NA       | NA        | NA   | NA        | NA |
| possibly_damaging |                  |                   | NA               | NA       | NA        | 0    | NA        | NA |
|                   | NA               | NA                | NA               | NA       | 0         | 0    | NA        | NA |
|                   | NA               | NA                | NA               | NA       | NA        | NA   | NA        | NA |
|                   | NA               | NA                | NA               | NA       | NA        | NA   | NA        | NA |
|                   | NA               | NA                | NA               | NA       | NA        | NA   | NA        | NA |
|                   | NA               | NA                | NA               | NA       | NA        | 0    |           |    |
| Unknown           | NA               | Moffitt           | hs37d5           | 5        | 157094844 |      | 157094844 |    |
|                   | +                | 0                 | SNP              | C        | C         | A    | novel     |    |
| none              | MOF-AM2          | NA                | 0                | 0        | 0         | 0    | 0         | 0  |



|                  |                   |                   |                  |          |           |           |          |    |
|------------------|-------------------|-------------------|------------------|----------|-----------|-----------|----------|----|
|                  | NA                | NA                | NA               | NA       | NA        | NA        | NA       | NA |
|                  | NA                | NA                | NA               | NA       | NA        | NA        | NA       | NA |
|                  | NA                | NA                | NA               | NA       | NA        | NA        | NA       | 0  |
|                  | NA                | NA                | NA               | NA       | NA        | NA        | 0        | 0  |
|                  | NA                | NA                | NA               | NA       | NA        | NA        | NA       | NA |
|                  | NA                | NA                | NA               | NA       | NA        | NA        | NA       | NA |
|                  | NA                | NA                | NA               | NA       | NA        | NA        | NA       | NA |
|                  | NA                | NA                | NA               | NA       | NA        | NA        | NA       | 0  |
| PROP1            | NA                | Moffitt           | hs37d5           | 5        | 177421231 | 177421231 |          |    |
|                  | +                 | Missense_Mutation |                  |          | SNP       | C         | C        | T  |
|                  | novel             | none              | MOF-AM6          | NA       | 0         | 0         | 0        | 0  |
|                  | 0                 | 0                 | Unknown          | Untested | Somatic   | NA        | WXS      |    |
| none             | 0                 | 0                 | Illumina_NextSeq | NA       | NA        | NA        | c.G218A  | NA |
|                  | p.R73H            | NM_006261         |                  | exon2    | 0         | 0         | 0        | 0  |
|                  | 0                 | 0                 | NA               | NA       | NA        | NA        | NA       | NA |
|                  | NA                | NA                | NA               | NA       | NA        | NA        | NA       | NA |
|                  | NA                | NA                | NA               | NA       | NA        | NA        | NA       | NA |
|                  | NA                | NA                | NA               | NA       | NA        | NA        | NA       | NA |
|                  | probably_damaging |                   | NA               | NA       | NA        | 0         | NA       | NA |
|                  | NA                | NA                | NA               | NA       | 0         | 0         | NA       | NA |
|                  | NA                | NA                | NA               | NA       | NA        | NA        | NA       | NA |
|                  | NA                | NA                | NA               | NA       | NA        | NA        | NA       | NA |
|                  | NA                | NA                | NA               | NA       | NA        | NA        | NA       | NA |
|                  | NA                | NA                | NA               | NA       | NA        | 0         |          |    |
| Unknown          | NA                | Moffitt           | hs37d5           | 5        | 179956224 | 179956224 |          |    |
|                  | +                 | 0                 | SNP              | C        | C         | G         | novel    |    |
| none             | MOF-MA1           | NA                | 0                | 0        | 0         | 0         | 0        | 0  |
|                  | Unknown           | Untested          | Somatic          | NA       | WXS       | none      | 0        | 0  |
|                  | Illumina_NextSeq  | NA                | NA               | 0        | 0         | 0         | 0        | 0  |
|                  | 0                 | 0                 | 0                | 0        | 0         | 0         | 0        | NA |
|                  | NA                | NA                | NA               | NA       | NA        | NA        | NA       | NA |
|                  | NA                | NA                | NA               | NA       | NA        | NA        | NA       | NA |
|                  | NA                | NA                | NA               | NA       | NA        | NA        | NA       | NA |
|                  | NA                | NA                | NA               | NA       | NA        | NA        | NA       | 0  |
|                  | NA                | NA                | NA               | NA       | NA        | NA        | 0        | 0  |
|                  | NA                | NA                | NA               | NA       | NA        | NA        | NA       | NA |
|                  | NA                | NA                | NA               | NA       | NA        | NA        | NA       | NA |
|                  | NA                | NA                | NA               | NA       | NA        | NA        | NA       | NA |
|                  | NA                | NA                | NA               | NA       | NA        | NA        | NA       | 0  |
| Unknown          | NA                | Moffitt           | hs37d5           | 6        | 10990078  | 10990078  | +        | 0  |
|                  | SNP               | C                 | C                | T        | novel     | none      | MOF-AM5  | NA |
|                  | 0                 | 0                 | 0                | 0        | 0         | 0         | Unknown  |    |
| Untested Somatic | NA                | NA                | WXS              | none     | 0         | 0         |          |    |
| Illumina_NextSeq | NA                | NA                | 0                | 0        | NA        | 0         | 0        | 0  |
|                  | 0                 | 0                 | 0                | 0        | 0         | 0         | NA       | NA |
|                  | NA                | NA                | NA               | NA       | NA        | NA        | NA       | NA |
|                  | NA                | NA                | NA               | NA       | NA        | NA        | NA       | NA |
|                  | NA                | NA                | NA               | NA       | NA        | NA        | NA       | NA |
|                  | NA                | NA                | NA               | NA       | NA        | NA        | 0        | NA |
|                  | NA                | NA                | NA               | NA       | NA        | 0.000000  | 0.000116 | NA |



|                   |                  |          |         |    |          |          |          |    |
|-------------------|------------------|----------|---------|----|----------|----------|----------|----|
| MUC22             | NA               | Moffitt  | hs37d5  | 6  | 30995387 | 30995387 | +        |    |
| Missense_Mutation |                  |          | SNP     | A  | A        | C        | novel    |    |
| none              | MOF-AM2          | NA       | 0       | 0  | 0        | 0        | 0        | 0  |
|                   | Unknown          | Untested | Somatic | NA | WXS      | none     | 0        | 0  |
|                   | Illumina_NextSeq | NA       | NA      | NA | c.A2179C | NA       | p.T727P  |    |
| NM_001198815      | exon3            | 0        | 0       | 0  | 0        | 0        | 0        | 0  |
|                   | NA               | NA       | NA      | NA | NA       | NA       | NA       | NA |
|                   | NA               | NA       | NA      | NA | NA       | NA       | NA       | NA |
|                   | NA               | NA       | NA      | NA | NA       | NA       | NA       | NA |
|                   | NA               | NA       | NA      | NA | NA       | NA       | NA       | NA |
|                   | 0                | NA       | NA      | NA | NA       | NA       | NA       | 0  |
|                   | 0                | NA       | NA      | NA | NA       | NA       | NA       | NA |
|                   | NA               | NA       | NA      | NA | NA       | NA       | NA       | NA |
|                   | NA               | NA       | NA      | NA | NA       | NA       | NA       | NA |
|                   | NA               | NA       | NA      | NA | NA       | NA       | NA       | NA |
|                   | 0                |          |         |    |          |          |          |    |
| TNXB              | NA               | Moffitt  | hs37d5  | 6  | 32030213 | 32030213 | +        |    |
| Missense_Mutation |                  |          | SNP     | T  | T        | G        | novel    |    |
| none              | MOF-AM2          | NA       | 0       | 0  | 0        | 0        | 0        | 0  |
|                   | Unknown          | Untested | Somatic | NA | WXS      | none     | 0        | 0  |
|                   | Illumina_NextSeq | NA       | NA      | NA | c.A6889C | NA       | p.T2297P |    |
| NM_019105         | exon20           | 0        | 0       | 0  | 0        | 0        | 0        | 0  |
|                   | NA               | NA       | NA      | NA | NA       | NA       | NA       | NA |
|                   | NA               | NA       | NA      | NA | NA       | NA       | NA       | NA |
|                   | NA               | NA       | NA      | NA | NA       | NA       | NA       | NA |
|                   | NA               | NA       | NA      | NA | NA       | NA       | NA       | NA |
|                   | 0                | NA       | NA      | NA | NA       | NA       | NA       | 0  |
|                   | 0                | NA       | NA      | NA | NA       | NA       | NA       | NA |
|                   | NA               | NA       | NA      | NA | NA       | NA       | NA       | NA |
|                   | NA               | NA       | NA      | NA | NA       | NA       | NA       | NA |
|                   | NA               | NA       | NA      | NA | NA       | NA       | NA       | NA |
|                   | 0                |          |         |    |          |          |          |    |
| Unknown           | NA               | Moffitt  | hs37d5  | 6  | 32940710 | 32940710 | +        | 0  |
|                   | SNP              | T        | T       | G  | novel    | none     | MOF-MA1  | NA |
|                   | 0                | 0        | 0       | 0  | 0        | 0        | Unknown  |    |
| Untested Somatic  | NA               | WXS      | none    | 0  | 0        | 0        |          |    |
| Illumina_NextSeq  | NA               | NA       | 0       | NA | 0        | 0        | 0        | 0  |
|                   | 0                | 0        | 0       | 0  | 0        | 0        | NA       | NA |
|                   | NA               | NA       | NA      | NA | NA       | NA       | NA       | NA |
|                   | NA               | NA       | NA      | NA | NA       | NA       | NA       | NA |
|                   | NA               | NA       | NA      | NA | NA       | NA       | NA       | NA |
|                   | NA               | NA       | NA      | NA | NA       | NA       | 0        | NA |
|                   | NA               | NA       | NA      | NA | NA       | 0        | 0        | NA |
|                   | NA               | NA       | NA      | NA | NA       | NA       | NA       | NA |
|                   | NA               | NA       | NA      | NA | NA       | NA       | NA       | NA |
|                   | NA               | NA       | NA      | NA | NA       | NA       | NA       | NA |
|                   | NA               | NA       | NA      | NA | NA       | NA       | 0        |    |
| MLN               | NA               | Moffitt  | hs37d5  | 6  | 33763323 | 33763323 | +        |    |
| Silent            | SNP              | C        | C       | G  | novel    | none     | MOF-MA1  | NA |
|                   | 0                | 0        | 0       | 0  | 0        | 0        | Unknown  |    |





|                   |                  |                  |        |          |                   |          |         |    |
|-------------------|------------------|------------------|--------|----------|-------------------|----------|---------|----|
|                   | NA               | NA               | NA     | NA       | NA                | NA       | NA      | NA |
|                   | NA               | NA               | NA     | NA       | NA                | NA       | NA      | NA |
|                   | NA               | NA               | NA     | NA       | NA                | NA       | 0       | NA |
|                   | NA               | NA               | NA     | NA       | NA                | 0        | 0       | NA |
|                   | NA               | NA               | NA     | NA       | NA                | NA       | NA      | NA |
|                   | NA               | NA               | NA     | NA       | NA                | NA       | NA      | NA |
|                   | NA               | NA               | NA     | NA       | NA                | NA       | NA      | NA |
|                   | NA               | NA               | NA     | NA       | NA                | NA       | 0       | NA |
| Unknown           | NA               | Moffitt          | hs37d5 | 6        | 53784275          | 53784275 | +       | 0  |
|                   | SNP              | T                | T      | A        | novel             | none     | MOF-MA1 | NA |
|                   | 0                | 0                | 0      | 0        | 0                 | 0        | Unknown |    |
| Untested Somatic  | NA               | WXS              | none   | 0        | 0                 | 0        |         |    |
| Illumina_NextSeq  | NA               | NA               | 0      | NA       | 0                 | 0        | 0       | 0  |
|                   | 0                | 0                | 0      | 0        | 0                 | 0        | NA      | NA |
|                   | NA               | NA               | NA     | NA       | NA                | NA       | NA      | NA |
|                   | NA               | NA               | NA     | NA       | NA                | NA       | NA      | NA |
|                   | NA               | NA               | NA     | NA       | NA                | NA       | NA      | NA |
|                   | NA               | NA               | NA     | NA       | NA                | NA       | 0       | NA |
|                   | NA               | NA               | NA     | NA       | NA                | 0        | 0       | NA |
|                   | NA               | NA               | NA     | NA       | NA                | NA       | NA      | NA |
|                   | NA               | NA               | NA     | NA       | NA                | NA       | NA      | NA |
|                   | NA               | NA               | NA     | NA       | NA                | NA       | NA      | NA |
|                   | NA               | NA               | NA     | NA       | NA                | NA       | 0       | NA |
| Unknown           | NA               | Moffitt          | hs37d5 | 6        | 71012449          | 71012449 | +       | 0  |
|                   | SNP              | C                | C      | G        | novel             | none     | MOF-MA1 | NA |
|                   | 0                | 0                | 0      | 0        | 0                 | 0        | Unknown |    |
| Untested Somatic  | NA               | WXS              | none   | 0        | 0                 | 0        |         |    |
| Illumina_NextSeq  | NA               | NA               | 0      | NA       | 0                 | 0        | 0       | 0  |
|                   | 0                | 0                | 0      | 0        | 0                 | 0        | NA      | NA |
|                   | NA               | NA               | NA     | NA       | NA                | NA       | NA      | NA |
|                   | NA               | NA               | NA     | NA       | NA                | NA       | NA      | NA |
|                   | NA               | NA               | NA     | NA       | NA                | NA       | NA      | NA |
|                   | NA               | NA               | NA     | NA       | NA                | NA       | 0       | NA |
|                   | NA               | NA               | NA     | NA       | NA                | 0        | 0       | NA |
|                   | NA               | NA               | NA     | NA       | NA                | NA       | NA      | NA |
|                   | NA               | NA               | NA     | NA       | NA                | NA       | NA      | NA |
|                   | NA               | NA               | NA     | NA       | NA                | NA       | NA      | NA |
|                   | NA               | NA               | NA     | NA       | NA                | NA       | 0       | NA |
| DOPEY1            | NA               | Moffitt          | hs37d5 | 6        | 83843947          | 83843947 | +       |    |
| Missense_Mutation |                  | SNP              | G      | G        | C                 | novel    |         |    |
| none              | MOF-MA1          | NA               | 0      | 0        | 0                 | 0        | 0       | 0  |
|                   | Unknown          | Untested Somatic | NA     | WXS      | none              | 0        | 0       | 0  |
|                   | Illumina_NextSeq | NA               | NA     | c.G2784C | NA                | p.W928C  |         |    |
| NM_001199942      | exon19           | 0                | 0      | 0        | 0                 | 0        | 0       | 0  |
|                   | NA               | NA               | NA     | NA       | NA                | NA       | NA      | NA |
|                   | NA               | NA               | NA     | NA       | NA                | NA       | NA      | NA |
|                   | NA               | NA               | NA     | NA       | NA                | NA       | NA      | NA |
|                   | NA               | NA               | NA     | NA       | probably_damaging |          |         | NA |
|                   | NA               | NA               | 0      | NA       | NA                | NA       | NA      | NA |
|                   | NA               | 0                | 0      | NA       | NA                | NA       | NA      | NA |



|                   |                  |                   |                  |          |           |      |           |    |
|-------------------|------------------|-------------------|------------------|----------|-----------|------|-----------|----|
|                   | NA               | NA                | NA               | NA       | NA        | 0    |           |    |
| GPRC6A            | NA               | Moffitt           | hs37d5           | 6        | 117116897 |      | 117116897 |    |
|                   | +                | Missense_Mutation |                  |          | SNP       | T    | T         | A  |
|                   | novel            | none              | MOF-MA1          | NA       | 0         | 0    | 0         | 0  |
|                   | 0                | 0                 | Unknown          | Untested | Somatic   | NA   | WXS       |    |
| none              | 0                | 0                 | Illumina_NextSeq | NA       | NA        | NA   | c.A1650T  | NA |
|                   | p.E550D          | NM_148963         |                  | exon5    | 0         | 0    | 0         | 0  |
|                   | 0                | 0                 | NA               | NA       | NA        | NA   | NA        | NA |
|                   | NA               | NA                | NA               | NA       | NA        | NA   | NA        | NA |
|                   | NA               | NA                | NA               | NA       | NA        | NA   | NA        | NA |
|                   | NA               | NA                | NA               | NA       | NA        | NA   | NA        | NA |
|                   | NA               | NA                | NA               | NA       | NA        | NA   | NA        | NA |
| probably_damaging |                  |                   | NA               | NA       | NA        | 0    | NA        | NA |
|                   | NA               | NA                | NA               | NA       | 0         | 0    | NA        | NA |
|                   | NA               | NA                | NA               | NA       | NA        | NA   | NA        | NA |
|                   | NA               | NA                | NA               | NA       | NA        | NA   | NA        | NA |
|                   | NA               | NA                | NA               | NA       | NA        | NA   | NA        | NA |
|                   | NA               | NA                | NA               | NA       | NA        | 0    | NA        | NA |
| Unknown           | NA               | Moffitt           | hs37d5           | 6        | 117127505 |      | 117127505 |    |
|                   | +                | 0                 | SNP              | A        | A         | C    | novel     |    |
| none              | MOF-AM2          | NA                | 0                | 0        | 0         | 0    | 0         | 0  |
|                   | Unknown          | Untested          | Somatic          | NA       | WXS       | none | 0         | 0  |
|                   | Illumina_NextSeq | NA                | NA               | 0        | 0         | 0    | 0         | 0  |
|                   | 0                | 0                 | 0                | 0        | 0         | 0    | 0         | NA |
|                   | NA               | NA                | NA               | NA       | NA        | NA   | NA        | NA |
|                   | NA               | NA                | NA               | NA       | NA        | NA   | NA        | NA |
|                   | NA               | NA                | NA               | NA       | NA        | NA   | NA        | NA |
|                   | NA               | NA                | NA               | NA       | NA        | NA   | NA        | 0  |
|                   | NA               | NA                | NA               | NA       | NA        | NA   | 0         | 0  |
|                   | NA               | NA                | NA               | NA       | NA        | NA   | NA        | NA |
|                   | NA               | NA                | NA               | NA       | NA        | NA   | NA        | NA |
|                   | NA               | NA                | NA               | NA       | NA        | NA   | NA        | NA |
|                   | NA               | NA                | NA               | NA       | NA        | NA   | NA        | NA |
|                   | NA               | NA                | NA               | NA       | NA        | NA   | NA        | 0  |
| GPRC6A            | NA               | Moffitt           | hs37d5           | 6        | 117130660 |      | 117130660 |    |
|                   | +                | Missense_Mutation |                  |          | SNP       | T    | T         | G  |
|                   | novel            | none              | MOF-AM2          | NA       | 0         | 0    | 0         | 0  |
|                   | 0                | 0                 | Unknown          | Untested | Somatic   | NA   | WXS       |    |
| none              | 0                | 0                 | Illumina_NextSeq | NA       | NA        | NA   | c.A315C   | NA |
|                   | p.E105D          | NM_148963         |                  | exon2    | 0         | 0    | 0         | 0  |
|                   | 0                | 0                 | NA               | NA       | NA        | NA   | NA        | NA |
|                   | NA               | NA                | NA               | NA       | NA        | NA   | NA        | NA |
|                   | NA               | NA                | NA               | NA       | NA        | NA   | NA        | NA |
|                   | NA               | NA                | NA               | NA       | NA        | NA   | benign    | NA |
|                   | NA               | NA                | 0                | NA       | NA        | NA   | NA        | NA |
|                   | NA               | 0                 | 0                | NA       | NA        | NA   | NA        | NA |
|                   | NA               | NA                | NA               | NA       | NA        | NA   | NA        | NA |
|                   | NA               | NA                | NA               | NA       | NA        | NA   | NA        | NA |
|                   | NA               | NA                | NA               | NA       | NA        | NA   | NA        | NA |
|                   | NA               | NA                | NA               | NA       | NA        | NA   | NA        | NA |
|                   | NA               | NA                | 0                | NA       | NA        | NA   | NA        | NA |
| Unknown           | NA               | Moffitt           | hs37d5           | 6        | 117241621 |      | 117241621 |    |
|                   | +                | 0                 | SNP              | A        | A         | C    | novel     |    |

|         |                  |                   |                  |          |           |           |           |    |
|---------|------------------|-------------------|------------------|----------|-----------|-----------|-----------|----|
| none    | MOF-AM2          | NA                | 0                | 0        | 0         | 0         | 0         | 0  |
|         | Unknown          | Untested          | Somatic          | NA       | WXS       | none      | 0         | 0  |
|         | Illumina_NextSeq | NA                | NA               | 0        | NA        | NA        | 0         | 0  |
|         | 0                | 0                 | 0                | 0        | 0         | 0         | 0         | NA |
|         | NA               | NA                | NA               | NA       | NA        | NA        | NA        | NA |
|         | NA               | NA                | NA               | NA       | NA        | NA        | NA        | NA |
|         | NA               | NA                | NA               | NA       | NA        | NA        | NA        | NA |
|         | NA               | NA                | NA               | NA       | NA        | NA        | NA        | 0  |
|         | NA               | NA                | NA               | NA       | NA        | NA        | 0         | 0  |
|         | NA               | NA                | NA               | NA       | NA        | NA        | NA        | NA |
|         | NA               | NA                | NA               | NA       | NA        | NA        | NA        | NA |
|         | NA               | NA                | NA               | NA       | NA        | NA        | NA        | NA |
|         | NA               | NA                | NA               | NA       | NA        | NA        | NA        | 1  |
| RFX6    | NA               | Moffitt           | hs37d5           | 6        | 117248694 | 117248694 | 117248694 |    |
|         | +                | Missense_Mutation |                  |          | SNP       | C         | C         | T  |
|         | novel            | none              | MOF-AM5          | NA       | 0         | 0         | 0         | 0  |
| none    | 0                | 0                 | Unknown          | Untested | Somatic   | NA        | WXS       |    |
|         | 0                | 0                 | Illumina_NextSeq | NA       | NA        | c.C2390T  | NA        |    |
|         | p.S797L          | NM_173560         | exon17           | 0        | 0         | 0         | 0         | 0  |
|         | 0                | 0                 | NA               | NA       | NA        | NA        | NA        | NA |
|         | NA               | NA                | NA               | NA       | NA        | NA        | NA        | NA |
|         | NA               | NA                | NA               | NA       | NA        | NA        | NA        | NA |
|         | NA               | NA                | NA               | NA       | NA        | NA        | benign    | NA |
|         | NA               | NA                | 0                | NA       | NA        | NA        | NA        | NA |
|         | NA               | 0                 | 0                | NA       | NA        | NA        | NA        | NA |
|         | NA               | NA                | NA               | NA       | NA        | NA        | NA        | NA |
|         | NA               | NA                | NA               | NA       | NA        | NA        | NA        | NA |
|         | NA               | NA                | NA               | NA       | NA        | NA        | NA        | NA |
|         | NA               | NA                | 0                | NA       | NA        | NA        | NA        | NA |
| Unknown | NA               | Moffitt           | hs37d5           | 6        | 131948469 | 131948469 | 131948469 |    |
|         | +                | 0                 | SNP              | G        | G         | A         | novel     |    |
| none    | MOF-AM6          | NA                | 0                | 0        | 0         | 0         | 0         | 0  |
|         | Unknown          | Untested          | Somatic          | NA       | WXS       | none      | 0         | 0  |
|         | Illumina_NextSeq | NA                | NA               | 0        | NA        | NA        | 0         | 0  |
|         | 0                | 0                 | 0                | 0        | 0         | 0         | 0         | NA |
|         | NA               | NA                | NA               | NA       | NA        | NA        | NA        | NA |
|         | NA               | NA                | NA               | NA       | NA        | NA        | NA        | NA |
|         | NA               | NA                | NA               | NA       | NA        | NA        | NA        | NA |
|         | NA               | NA                | NA               | NA       | NA        | NA        | NA        | 0  |
|         | NA               | NA                | NA               | NA       | NA        | NA        | 0         | 0  |
|         | NA               | NA                | NA               | NA       | NA        | NA        | NA        | NA |
|         | NA               | NA                | NA               | NA       | NA        | NA        | NA        | NA |
|         | NA               | NA                | NA               | NA       | NA        | NA        | NA        | NA |
|         | NA               | NA                | NA               | NA       | NA        | NA        | NA        | 0  |
| ENPP3   | NA               | Moffitt           | hs37d5           | 6        | 131996271 | 131996271 | 131996271 |    |
|         | +                | Missense_Mutation |                  |          | SNP       | C         | C         | T  |
|         | novel            | none              | MOF-AM6          | NA       | 0         | 0         | 0         | 0  |
| none    | 0                | 0                 | Unknown          | Untested | Somatic   | NA        | WXS       |    |
|         | 0                | 0                 | Illumina_NextSeq | NA       | NA        | c.C814T   | NA        |    |
|         | p.P272S          | NM_005021         | exon9            | 0        | 0         | 0         | 0         | 0  |





|                   |                  |                   |                  |          |           |           |          |    |
|-------------------|------------------|-------------------|------------------|----------|-----------|-----------|----------|----|
|                   | NA               | NA                | NA               | NA       | NA        | NA        | NA       | NA |
|                   | NA               | NA                | NA               | NA       | NA        | NA        | NA       | NA |
|                   | NA               | NA                | NA               | NA       | NA        | NA        | NA       | 0  |
| SYNJ2             | NA               | Moffitt           | hs37d5           | 6        | 158504534 | 158504534 |          |    |
|                   | +                | Missense_Mutation |                  |          | SNP       | G         | G        | A  |
|                   | novel            | none              | MOF-MA1          | NA       | 0         | 0         | 0        | 0  |
|                   | 0                | 0                 | Unknown          | Untested | Somatic   | NA        | WXS      |    |
| none              | 0                | 0                 | Illumina_NextSeq | NA       | NA        | NA        | c.G2939A | NA |
|                   | p.R980Q          | NM_003898         | exon21           | 0        | 0         | 0         | 0        | 0  |
|                   | 0                | 0                 | NA               | NA       | NA        | NA        | NA       | NA |
|                   | NA               | NA                | NA               | NA       | NA        | NA        | NA       | NA |
|                   | NA               | NA                | NA               | NA       | NA        | NA        | NA       | NA |
|                   | NA               | NA                | NA               | NA       | NA        | NA        | NA       | NA |
| possibly_damaging |                  |                   | NA               | NA       | NA        | 0         | NA       | NA |
|                   | NA               | NA                | NA               | NA       | 0.000227  | 0.000000  | NA       | NA |
|                   | NA               | NA                | NA               | NA       | NA        | NA        | NA       | NA |
|                   | NA               | NA                | NA               | NA       | NA        | NA        | NA       | NA |
|                   | NA               | NA                | NA               | NA       | NA        | NA        | NA       | NA |
|                   | NA               | NA                | NA               | NA       | NA        | 0         |          |    |
| Unknown           | NA               | Moffitt           | hs37d5           | 6        | 170598932 | 170598932 |          |    |
|                   | +                | 0                 | SNP              | T        | T         | G         | novel    |    |
| none              | MOF-MA1          | NA                | 0                | 0        | 0         | 0         | 0        | 0  |
|                   | Unknown          | Untested          | Somatic          | NA       | WXS       | none      | 0        | 0  |
|                   | Illumina_NextSeq | NA                | NA               | NA       | 0         | NA        | 0        | 0  |
|                   | 0                | 0                 | 0                | 0        | 0         | 0         | 0        | NA |
|                   | NA               | NA                | NA               | NA       | NA        | NA        | NA       | NA |
|                   | NA               | NA                | NA               | NA       | NA        | NA        | NA       | NA |
|                   | NA               | NA                | NA               | NA       | NA        | NA        | NA       | NA |
|                   | NA               | NA                | NA               | NA       | NA        | NA        | NA       | 0  |
|                   | NA               | NA                | NA               | NA       | NA        | NA        | 0        | 0  |
|                   | NA               | NA                | NA               | NA       | NA        | NA        | NA       | NA |
|                   | NA               | NA                | NA               | NA       | NA        | NA        | NA       | NA |
|                   | NA               | NA                | NA               | NA       | NA        | NA        | NA       | NA |
|                   | NA               | NA                | NA               | NA       | NA        | NA        | NA       | 0  |
| Unknown           | NA               | Moffitt           | hs37d5           | 7        | 2578995   | 2578995   | +        | 0  |
|                   | SNP              | G                 | G                | A        | novel     | none      | MOF-AM2  | NA |
|                   | 0                | 0                 | 0                | 0        | 0         | 0         | Unknown  |    |
| Untested          | Somatic          | NA                | WXS              | none     | 0         | 0         |          |    |
| Illumina_NextSeq  | NA               | NA                | NA               | 0        | NA        | 0         | 0        | 0  |
|                   | 0                | 0                 | 0                | 0        | 0         | 0         | NA       | NA |
|                   | NA               | NA                | NA               | NA       | NA        | NA        | NA       | NA |
|                   | NA               | NA                | NA               | NA       | NA        | NA        | NA       | NA |
|                   | NA               | NA                | NA               | NA       | NA        | NA        | NA       | NA |
|                   | NA               | NA                | NA               | NA       | NA        | NA        | 0        | NA |
|                   | NA               | NA                | NA               | NA       | NA        | 0         | 0        | NA |
|                   | NA               | NA                | NA               | NA       | NA        | NA        | NA       | NA |
|                   | NA               | NA                | NA               | NA       | NA        | NA        | NA       | NA |
|                   | NA               | NA                | NA               | NA       | NA        | NA        | NA       | NA |
|                   | NA               | NA                | NA               | NA       | NA        | NA        | 0        |    |
| Unknown           | NA               | Moffitt           | hs37d5           | 7        | 6075247   | 6075247   | +        | 0  |



|                   |                  |                  |        |          |          |          |         |    |
|-------------------|------------------|------------------|--------|----------|----------|----------|---------|----|
|                   | SNP              | G                | G      | A        | novel    | none     | MOF-MA1 | NA |
|                   | 0                | 0                | 0      | 0        | 0        | 0        | Unknown |    |
| Untested Somatic  | NA               | NA               | WXS    | none     | 0        | 0        |         |    |
| Illumina_NextSeq  | NA               | NA               | NA     | 0        | NA       | 0        | 0       | 0  |
|                   | 0                | 0                | 0      | 0        | 0        | 0        | NA      | NA |
|                   | NA               | NA               | NA     | NA       | NA       | NA       | NA      | NA |
|                   | NA               | NA               | NA     | NA       | NA       | NA       | NA      | NA |
|                   | NA               | NA               | NA     | NA       | NA       | NA       | NA      | NA |
|                   | NA               | NA               | NA     | NA       | NA       | NA       | 0       | NA |
|                   | NA               | NA               | NA     | NA       | NA       | 0        | 0       | NA |
|                   | NA               | NA               | NA     | NA       | NA       | NA       | NA      | NA |
|                   | NA               | NA               | NA     | NA       | NA       | NA       | NA      | NA |
|                   | NA               | NA               | NA     | NA       | NA       | NA       | NA      | NA |
| Unknown           | NA               | Moffitt          | hs37d5 | 7        | 6075248  | 6075248  | +       | 0  |
|                   | SNP              | G                | G      | A        | novel    | none     | MOF-MA1 | NA |
|                   | 0                | 0                | 0      | 0        | 0        | 0        | Unknown |    |
| Untested Somatic  | NA               | NA               | WXS    | none     | 0        | 0        |         |    |
| Illumina_NextSeq  | NA               | NA               | NA     | 0        | NA       | 0        | 0       | 0  |
|                   | 0                | 0                | 0      | 0        | 0        | 0        | NA      | NA |
|                   | NA               | NA               | NA     | NA       | NA       | NA       | NA      | NA |
|                   | NA               | NA               | NA     | NA       | NA       | NA       | NA      | NA |
|                   | NA               | NA               | NA     | NA       | NA       | NA       | NA      | NA |
|                   | NA               | NA               | NA     | NA       | NA       | NA       | 0       | NA |
|                   | NA               | NA               | NA     | NA       | NA       | 0        | 0       | NA |
|                   | NA               | NA               | NA     | NA       | NA       | NA       | NA      | NA |
|                   | NA               | NA               | NA     | NA       | NA       | NA       | NA      | NA |
|                   | NA               | NA               | NA     | NA       | NA       | NA       | NA      | NA |
|                   | NA               | NA               | NA     | NA       | NA       | NA       | 0       | NA |
| Unknown           | NA               | Moffitt          | hs37d5 | 7        | 12428472 | 12428472 | +       | 0  |
|                   | SNP              | G                | G      | A        | novel    | none     | MOF-MA1 | NA |
|                   | 0                | 0                | 0      | 0        | 0        | 0        | Unknown |    |
| Untested Somatic  | NA               | NA               | WXS    | none     | 0        | 0        |         |    |
| Illumina_NextSeq  | NA               | NA               | NA     | 0        | NA       | 0        | 0       | 0  |
|                   | 0                | 0                | 0      | 0        | 0        | 0        | NA      | NA |
|                   | NA               | NA               | NA     | NA       | NA       | NA       | NA      | NA |
|                   | NA               | NA               | NA     | NA       | NA       | NA       | NA      | NA |
|                   | NA               | NA               | NA     | NA       | NA       | NA       | NA      | NA |
|                   | NA               | NA               | NA     | NA       | NA       | NA       | 0       | NA |
|                   | NA               | NA               | NA     | NA       | NA       | 0        | 0       | NA |
|                   | NA               | NA               | NA     | NA       | NA       | NA       | NA      | NA |
|                   | NA               | NA               | NA     | NA       | NA       | NA       | NA      | NA |
|                   | NA               | NA               | NA     | NA       | NA       | NA       | NA      | NA |
|                   | NA               | NA               | NA     | NA       | NA       | NA       | 0       | NA |
| SCIN              | NA               | Moffitt          | hs37d5 | 7        | 12689142 | 12689142 | +       |    |
| Missense_Mutation |                  | SNP              | T      | T        | T        | G        | novel   |    |
| none              | MOF-MA1          | NA               | 0      | 0        | 0        | 0        | 0       | 0  |
|                   | Unknown          | Untested Somatic | NA     | WXS      | none     | 0        | 0       | 0  |
|                   | Illumina_NextSeq | NA               | NA     | c.T1932G | NA       | p.D644E  |         |    |
| NM_001112706      | exon14           | 0                | 0      | 0        | 0        | 0        | 0       | 0  |





|                  |          |         |        |               |          |            |          |    |
|------------------|----------|---------|--------|---------------|----------|------------|----------|----|
|                  | NA       | 0       |        |               |          |            |          |    |
| ZNF138           | NA       | Moffitt | hs37d5 | 7             | 64292175 | 64292175 + |          |    |
| Frame_Shift_Ins  | INS      | T       | T      | T             | TA       | novel      | none     |    |
| MOF-AM5          | NA       | 0       | 0      | 0             | 0        | 0          | 0        |    |
| Unknown          | Untested | Somatic | NA     | WXS           | none     | 0          | 0        |    |
| Illumina_NextSeq | NA       | NA      | NA     | c.477_478insA | NA       | NA         | p.H159fs |    |
| NM_006524        | exon3    | 0       | 0      | 0             | 0        | 0          | 0        | 0  |
|                  | NA       | NA      | NA     | NA            | NA       | NA         | NA       | NA |
|                  | NA       | NA      | NA     | NA            | NA       | NA         | NA       | NA |
|                  | NA       | NA      | NA     | NA            | NA       | NA         | NA       | NA |
|                  | NA       | NA      | NA     | NA            | NA       | NA         | NA       | NA |
|                  | 0        | NA      | NA     | NA            | NA       | NA         | NA       | 0  |
|                  | 0        | NA      | NA     | NA            | NA       | NA         | NA       | NA |
|                  | NA       | NA      | NA     | NA            | NA       | NA         | NA       | NA |
|                  | NA       | NA      | NA     | NA            | NA       | NA         | NA       | NA |
|                  | NA       | NA      | NA     | NA            | NA       | NA         | NA       | NA |
|                  | 0        |         |        |               |          |            |          |    |
| Unknown          | NA       | Moffitt | hs37d5 | 7             | 75890271 | 75890271 + |          | 0  |
|                  | SNP      | T       | T      | G             | novel    | none       | MOF-MA1  | NA |
|                  | 0        | 0       | 0      | 0             | 0        | 0          | Unknown  |    |
| Untested         | Somatic  | NA      | WXS    | none          | 0        | 0          |          |    |
| Illumina_NextSeq | NA       | NA      | NA     | 0             | NA       | 0          | 0        | 0  |
|                  | 0        | 0       | 0      | 0             | 0        | 0          | NA       | NA |
|                  | NA       | NA      | NA     | NA            | NA       | NA         | NA       | NA |
|                  | NA       | NA      | NA     | NA            | NA       | NA         | NA       | NA |
|                  | NA       | NA      | NA     | NA            | NA       | NA         | NA       | NA |
|                  | NA       | NA      | NA     | NA            | NA       | NA         | 0        | NA |
|                  | NA       | NA      | NA     | NA            | NA       | 0          | 0        | NA |
|                  | NA       | NA      | NA     | NA            | NA       | NA         | NA       | NA |
|                  | NA       | NA      | NA     | NA            | NA       | NA         | NA       | NA |
|                  | NA       | NA      | NA     | NA            | NA       | NA         | NA       | NA |
|                  | NA       | NA      | NA     | NA            | NA       | NA         | NA       | NA |
|                  | NA       | NA      | NA     | NA            | NA       | NA         | 0        | NA |
|                  | NA       | NA      | NA     | NA            | NA       | 0          | 0        | NA |
|                  | NA       | NA      | NA     | NA            | NA       | NA         | NA       | NA |
|                  | NA       | NA      | NA     | NA            | NA       | NA         | NA       | NA |
|                  | NA       | NA      | NA     | NA            | NA       | NA         | NA       | NA |
|                  | NA       | NA      | NA     | NA            | NA       | NA         | 0        |    |
| Unknown          | NA       | Moffitt | hs37d5 | 7             | 80295863 | 80295863 + |          | 0  |
|                  | SNP      | C       | C      | T             | novel    | none       | MOF-MA1  | NA |
|                  | 0        | 0       | 0      | 0             | 0        | 0          | Unknown  |    |
| Untested         | Somatic  | NA      | WXS    | none          | 0        | 0          |          |    |
| Illumina_NextSeq | NA       | NA      | NA     | 0             | NA       | 0          | 0        | 0  |
|                  | 0        | 0       | 0      | 0             | 0        | 0          | NA       | NA |
|                  | NA       | NA      | NA     | NA            | NA       | NA         | NA       | NA |
|                  | NA       | NA      | NA     | NA            | NA       | NA         | NA       | NA |
|                  | NA       | NA      | NA     | NA            | NA       | NA         | NA       | NA |
|                  | NA       | NA      | NA     | NA            | NA       | NA         | 0        | NA |
|                  | NA       | NA      | NA     | NA            | NA       | 0          | 0        | NA |
|                  | NA       | NA      | NA     | NA            | NA       | NA         | NA       | NA |
|                  | NA       | NA      | NA     | NA            | NA       | NA         | NA       | NA |
|                  | NA       | NA      | NA     | NA            | NA       | NA         | NA       | NA |
|                  | NA       | NA      | NA     | NA            | NA       | NA         | NA       | NA |
|                  | NA       | NA      | NA     | NA            | NA       | NA         | 0        |    |
| Unknown          | NA       | Moffitt | hs37d5 | 7             | 90226052 | 90226052 + |          | 0  |
|                  | SNP      | C       | C      | G             | novel    | none       | MOF-MA1  | NA |
|                  | 0        | 0       | 0      | 0             | 0        | 0          | Unknown  |    |





|         |                  |                   |         |    |           |      |           |    |
|---------|------------------|-------------------|---------|----|-----------|------|-----------|----|
|         | NA               | NA                | NA      | NA | NA        | NA   | NA        | NA |
|         | NA               | NA                | NA      | NA | NA        | NA   | NA        | NA |
|         | NA               | NA                | NA      | NA | NA        | NA   | NA        | 0  |
| Unknown | NA               | Moffitt           | hs37d5  | 7  | 101459453 |      | 101459453 |    |
|         | +                | 0                 | SNP     | T  | T         | G    | novel     |    |
| none    | MOF-MA1          | NA                | 0       | 0  | 0         | 0    | 0         | 0  |
|         | Unknown          | Untested          | Somatic | NA | WXS       | none | 0         | 0  |
|         | Illumina_NextSeq | NA                | NA      | NA | 0         | NA   | 0         | 0  |
|         | 0                | 0                 | 0       | 0  | 0         | 0    | 0         | NA |
|         | NA               | NA                | NA      | NA | NA        | NA   | NA        | NA |
|         | NA               | NA                | NA      | NA | NA        | NA   | NA        | NA |
|         | NA               | NA                | NA      | NA | NA        | NA   | NA        | NA |
|         | NA               | NA                | NA      | NA | NA        | NA   | NA        | 0  |
|         | NA               | NA                | NA      | NA | NA        | NA   | 0         | 0  |
|         | NA               | NA                | NA      | NA | NA        | NA   | NA        | NA |
|         | NA               | NA                | NA      | NA | NA        | NA   | NA        | NA |
|         | NA               | NA                | NA      | NA | NA        | NA   | NA        | NA |
|         | NA               | NA                | NA      | NA | NA        | NA   | NA        | 0  |
| Unknown | NA               | Moffitt           | hs37d5  | 7  | 103206654 |      | 103206654 |    |
|         | +                | 0                 | SNP     | C  | C         | T    | novel     |    |
| none    | MOF-MA1          | NA                | 0       | 0  | 0         | 0    | 0         | 0  |
|         | Unknown          | Untested          | Somatic | NA | WXS       | none | 0         | 0  |
|         | Illumina_NextSeq | NA                | NA      | NA | 0         | NA   | 0         | 0  |
|         | 0                | 0                 | 0       | 0  | 0         | 0    | 0         | NA |
|         | NA               | NA                | NA      | NA | NA        | NA   | NA        | NA |
|         | NA               | NA                | NA      | NA | NA        | NA   | NA        | NA |
|         | NA               | NA                | NA      | NA | NA        | NA   | NA        | NA |
|         | NA               | NA                | NA      | NA | NA        | NA   | NA        | NA |
|         | NA               | NA                | NA      | NA | NA        | NA   | NA        | 0  |
|         | NA               | NA                | NA      | NA | NA        | NA   | 0         | 0  |
|         | NA               | NA                | NA      | NA | NA        | NA   | NA        | NA |
|         | NA               | NA                | NA      | NA | NA        | NA   | NA        | NA |
|         | NA               | NA                | NA      | NA | NA        | NA   | NA        | NA |
|         | NA               | NA                | NA      | NA | NA        | NA   | NA        | 0  |
| Unknown | NA               | Moffitt           | hs37d5  | 7  | 107417073 |      | 107417073 |    |
|         | +                | 0                 | SNP     | C  | C         | G    | novel     |    |
| none    | MOF-MA1          | NA                | 0       | 0  | 0         | 0    | 0         | 0  |
|         | Unknown          | Untested          | Somatic | NA | WXS       | none | 0         | 0  |
|         | Illumina_NextSeq | NA                | NA      | NA | 0         | NA   | 0         | 0  |
|         | 0                | 0                 | 0       | 0  | 0         | 0    | 0         | NA |
|         | NA               | NA                | NA      | NA | NA        | NA   | NA        | NA |
|         | NA               | NA                | NA      | NA | NA        | NA   | NA        | NA |
|         | NA               | NA                | NA      | NA | NA        | NA   | NA        | NA |
|         | NA               | NA                | NA      | NA | NA        | NA   | NA        | NA |
|         | NA               | NA                | NA      | NA | NA        | NA   | NA        | 0  |
|         | NA               | NA                | NA      | NA | NA        | NA   | 0         | 0  |
|         | NA               | NA                | NA      | NA | NA        | NA   | NA        | NA |
|         | NA               | NA                | NA      | NA | NA        | NA   | NA        | NA |
|         | NA               | NA                | NA      | NA | NA        | NA   | NA        | NA |
|         | NA               | NA                | NA      | NA | NA        | NA   | NA        | NA |
|         | NA               | NA                | NA      | NA | NA        | NA   | NA        | 0  |
| LAMB4   | NA               | Moffitt           | hs37d5  | 7  | 107703313 |      | 107703313 |    |
|         | +                | Missense_Mutation |         |    | SNP       | C    | C         | G  |

|                   |                  |                   |                  |          |           |      |           |    |
|-------------------|------------------|-------------------|------------------|----------|-----------|------|-----------|----|
|                   | novel            | none              | MOF-MA1          | NA       | 0         | 0    | 0         | 0  |
|                   | 0                | 0                 | Unknown          | Untested | Somatic   | NA   | WXS       |    |
| none              | 0                | 0                 | Illumina_NextSeq | NA       | NA        | NA   | c.G3188C  | NA |
|                   | p.R1063P         | NM_007356         |                  | exon23   | 0         | 0    | 0         | 0  |
|                   | 0                | 0                 | NA               | NA       | NA        | NA   | NA        | NA |
|                   | NA               | NA                | NA               | NA       | NA        | NA   | NA        | NA |
|                   | NA               | NA                | NA               | NA       | NA        | NA   | NA        | NA |
|                   | NA               | NA                | NA               | NA       | NA        | NA   | NA        | NA |
| probably_damaging |                  |                   | NA               | NA       | NA        | 0    | NA        | NA |
|                   | NA               | NA                | NA               | NA       | 0         | 0    | NA        | NA |
|                   | NA               | NA                | NA               | NA       | NA        | NA   | NA        | NA |
|                   | NA               | NA                | NA               | NA       | NA        | NA   | NA        | NA |
|                   | NA               | NA                | NA               | NA       | NA        | NA   | NA        | NA |
| Unknown           | NA               | Moffitt           | hs37d5           | 7        | 115850835 |      | 115850835 |    |
|                   | +                | 0                 | SNP              | T        | T         | G    | novel     |    |
| none              | MOF-MA1          | NA                | 0                | 0        | 0         | 0    | 0         | 0  |
|                   | Unknown          | Untested          | Somatic          | NA       | WXS       | none | 0         | 0  |
|                   | Illumina_NextSeq | NA                | NA               | 0        | 0         | 0    | 0         | 0  |
|                   | 0                | 0                 | 0                | 0        | 0         | 0    | 0         | NA |
|                   | NA               | NA                | NA               | NA       | NA        | NA   | NA        | NA |
|                   | NA               | NA                | NA               | NA       | NA        | NA   | NA        | NA |
|                   | NA               | NA                | NA               | NA       | NA        | NA   | NA        | NA |
|                   | NA               | NA                | NA               | NA       | NA        | NA   | NA        | 0  |
|                   | NA               | NA                | NA               | NA       | NA        | NA   | 0         | 0  |
|                   | NA               | NA                | NA               | NA       | NA        | NA   | NA        | NA |
|                   | NA               | NA                | NA               | NA       | NA        | NA   | NA        | NA |
|                   | NA               | NA                | NA               | NA       | NA        | NA   | NA        | NA |
| AASS              | NA               | Moffitt           | hs37d5           | 7        | 121732904 |      | 121732904 |    |
|                   | +                | Missense_Mutation |                  |          | SNP       | C    | C         | G  |
|                   | novel            | none              | MOF-AM2          | NA       | 0         | 0    | 0         | 0  |
|                   | 0                | 0                 | Unknown          | Untested | Somatic   | NA   | WXS       |    |
| none              | 0                | 0                 | Illumina_NextSeq | NA       | NA        | NA   | c.G1868C  | NA |
|                   | p.G623A          | NM_005763         |                  | exon17   | 0         | 0    | 0         | 0  |
|                   | 0                | 0                 | NA               | NA       | NA        | NA   | NA        | NA |
|                   | NA               | NA                | NA               | NA       | NA        | NA   | NA        | NA |
|                   | NA               | NA                | NA               | NA       | NA        | NA   | NA        | NA |
|                   | NA               | NA                | NA               | NA       | NA        | NA   | NA        | NA |
| probably_damaging |                  |                   | NA               | NA       | NA        | 0    | NA        | NA |
|                   | NA               | NA                | NA               | NA       | 0         | 0    | NA        | NA |
|                   | NA               | NA                | NA               | NA       | NA        | NA   | NA        | NA |
|                   | NA               | NA                | NA               | NA       | NA        | NA   | NA        | NA |
|                   | NA               | NA                | NA               | NA       | NA        | NA   | NA        | NA |
|                   | NA               | NA                | NA               | NA       | NA        | 0    | NA        | NA |
| FAM71F2           | NA               | Moffitt           | hs37d5           | 7        | 128320129 |      | 128320129 |    |
|                   | +                | Silent            | SNP              | C        | C         | T    | novel     |    |
| none              | MOF-AM2          | NA                | 0                | 0        | 0         | 0    | 0         | 0  |
|                   | Unknown          | Untested          | Somatic          | NA       | WXS       | none | 0         | 0  |
|                   | Illumina_NextSeq | NA                | NA               | 0        | 0         | 0    | c.C660T   | NA |
|                   |                  |                   |                  |          |           |      | p.L220L   |    |









|                   |                  |          |         |    |          |          |         |    |    |
|-------------------|------------------|----------|---------|----|----------|----------|---------|----|----|
| 0                 |                  |          |         |    |          |          |         |    |    |
| MYOM2             | NA               | Moffitt  | hs37d5  | 8  | 2050538  | 2050538  | +       |    |    |
| Missense_Mutation |                  |          | SNP     | A  | A        | C        | novel   |    |    |
| none              | MOF-AM2          | NA       | 0       | 0  | 0        | 0        | 0       | 0  | 0  |
|                   | Unknown          | Untested | Somatic | NA | WXS      | none     | 0       | 0  | 0  |
|                   | Illumina_NextSeq | NA       | NA      | NA | c.A2701C | NA       | p.T901P |    |    |
| NM_003970         | exon21           | 0        | 0       | 0  | 0        | 0        | 0       | 0  | 0  |
|                   | NA               | NA       | NA      | NA | NA       | NA       | NA      | NA | NA |
|                   | NA               | NA       | NA      | NA | NA       | NA       | NA      | NA | NA |
|                   | NA               | NA       | NA      | NA | NA       | NA       | NA      | NA | NA |
|                   | NA               | NA       | NA      | NA | benign   | NA       | NA      | NA | NA |
|                   | 0                | NA       | NA      | NA | NA       | NA       | NA      | NA | 0  |
|                   | 0                | NA       | NA      | NA | NA       | NA       | NA      | NA | NA |
|                   | NA               | NA       | NA      | NA | NA       | NA       | NA      | NA | NA |
|                   | NA               | NA       | NA      | NA | NA       | NA       | NA      | NA | NA |
|                   | NA               | NA       | NA      | NA | NA       | NA       | NA      | NA | NA |
| 0                 |                  |          |         |    |          |          |         |    |    |
| MCPH1             | NA               | Moffitt  | hs37d5  | 8  | 6302762  | 6302762  | +       |    |    |
| Missense_Mutation |                  |          | SNP     | C  | C        | G        | novel   |    |    |
| none              | MOF-AM5          | NA       | 0       | 0  | 0        | 0        | 0       | 0  | 0  |
|                   | Unknown          | Untested | Somatic | NA | WXS      | none     | 0       | 0  | 0  |
|                   | Illumina_NextSeq | NA       | NA      | NA | c.C1519G | NA       | p.L507V |    |    |
| NM_024596         | exon8            | 0        | 0       | 0  | 0        | 0        | 0       | 0  | 0  |
|                   | NA               | NA       | NA      | NA | NA       | NA       | NA      | NA | NA |
|                   | NA               | NA       | NA      | NA | NA       | NA       | NA      | NA | NA |
|                   | NA               | NA       | NA      | NA | NA       | NA       | NA      | NA | NA |
|                   | NA               | NA       | NA      | NA | benign   | NA       | NA      | NA | NA |
|                   | 0                | NA       | NA      | NA | NA       | NA       | NA      | NA | 0  |
|                   | 0                | NA       | NA      | NA | NA       | NA       | NA      | NA | NA |
|                   | NA               | NA       | NA      | NA | NA       | NA       | NA      | NA | NA |
|                   | NA               | NA       | NA      | NA | NA       | NA       | NA      | NA | NA |
|                   | NA               | NA       | NA      | NA | NA       | NA       | NA      | NA | NA |
| 0                 |                  |          |         |    |          |          |         |    |    |
| Unknown           | NA               | Moffitt  | hs37d5  | 8  | 10946696 | 10946696 | +       |    | 0  |
|                   | SNP              | A        | A       | C  | novel    | none     | MOF-AM1 | NA |    |
|                   | 0                | 0        | 0       | 0  | 0        | 0        | Unknown |    |    |
| Untested Somatic  | NA               | WXS      | none    | 0  | 0        | 0        |         |    |    |
| Illumina_NextSeq  | NA               | NA       | 0       | NA | 0        | 0        | 0       | 0  | 0  |
|                   | 0                | 0        | 0       | 0  | 0        | 0        | NA      | NA | NA |
|                   | NA               | NA       | NA      | NA | NA       | NA       | NA      | NA | NA |
|                   | NA               | NA       | NA      | NA | NA       | NA       | NA      | NA | NA |
|                   | NA               | NA       | NA      | NA | NA       | NA       | NA      | NA | NA |
|                   | NA               | NA       | NA      | NA | NA       | NA       | 0       | NA | NA |
|                   | NA               | NA       | NA      | NA | NA       | 0        | 0       | NA | NA |
|                   | NA               | NA       | NA      | NA | NA       | NA       | NA      | NA | NA |
|                   | NA               | NA       | NA      | NA | NA       | NA       | NA      | NA | NA |
|                   | NA               | NA       | NA      | NA | NA       | NA       | NA      | NA | NA |
|                   | NA               | NA       | NA      | NA | NA       | NA       | 0       | NA | NA |
|                   | NA               | NA       | NA      | NA | NA       | NA       | 0       | NA | NA |
| Unknown           | NA               | Moffitt  | hs37d5  | 8  | 17400726 | 17400726 | +       |    | 0  |
|                   | SNP              | A        | A       | C  | novel    | none     | MOF-AM5 | NA |    |



|                  |          |         |        |             |          |          |           |    |
|------------------|----------|---------|--------|-------------|----------|----------|-----------|----|
|                  | NA       | NA      | NA     | NA          | NA       | NA       | NA        | NA |
|                  | NA       | NA      | NA     | NA          | NA       | NA       | NA        | NA |
|                  | NA       | NA      | NA     | NA          | NA       | NA       | 0         | NA |
|                  | NA       | NA      | NA     | NA          | NA       | 0        | 0         | NA |
|                  | NA       | NA      | NA     | NA          | NA       | NA       | NA        | NA |
|                  | NA       | NA      | NA     | NA          | NA       | NA       | NA        | NA |
|                  | NA       | NA      | NA     | NA          | NA       | NA       | NA        | NA |
|                  | NA       | NA      | NA     | NA          | NA       | NA       | 0         | NA |
| EPHX2            | NA       | Moffitt | hs37d5 | 8           | 27401347 | 27401347 | +         |    |
| Splice_Site      | SNP      | G       | G      | A           | novel    | none     |           |    |
| MOF-MA1          | NA       | 0       | 0      | 0           | 0        | 0        | 0         |    |
| Unknown          | Untested | Somatic | NA     | WXS         | none     | 0        | 0         |    |
| Illumina_NextSeq | NA       | NA      | NA     | c.1530+1G>A | NA       | 0        |           |    |
| NM_001979        |          | exon17  | 0      | 0           | 0        | 0        | 0         | 0  |
|                  | NA       | NA      | NA     | NA          | NA       | NA       | NA        | NA |
|                  | NA       | NA      | NA     | NA          | NA       | NA       | NA        | NA |
|                  | NA       | NA      | NA     | NA          | NA       | NA       | NA        | NA |
|                  | NA       | NA      | NA     | NA          | NA       | NA       | NA        | NA |
|                  | 0        | NA      | NA     | NA          | NA       | NA       | NA        | 0  |
|                  | 0        | NA      | NA     | NA          | NA       | NA       | NA        | NA |
|                  | NA       | NA      | NA     | NA          | NA       | NA       | NA        | NA |
|                  | NA       | NA      | NA     | NA          | NA       | NA       | NA        | NA |
|                  | NA       | NA      | NA     | NA          | NA       | NA       | NA        | NA |
|                  | 0        |         |        |             |          |          |           |    |
| DDHD2            | NA       | Moffitt | hs37d5 | 8           | 38103818 | 38103818 | +         |    |
| Silent           | SNP      | G       | G      | A           | novel    | none     | MOF-MA1   | NA |
|                  | 0        | 0       | 0      | 0           | 0        | 0        | Unknown   |    |
| Unknown          | Untested | Somatic | NA     | WXS         | none     | 0        |           |    |
| Illumina_NextSeq | NA       | NA      | NA     | c.G1125A    | NA       | p.K375K  | NM_015214 |    |
|                  | exon9    | 0       | 0      | 0           | 0        | 0        | 0         | NA |
|                  | NA       | NA      | NA     | NA          | NA       | NA       | NA        | NA |
|                  | NA       | NA      | NA     | NA          | NA       | NA       | NA        | NA |
|                  | NA       | NA      | NA     | NA          | NA       | NA       | NA        | NA |
|                  | NA       | NA      | NA     | NA          | NA       | NA       | NA        | 0  |
|                  | NA       | NA      | NA     | NA          | NA       | NA       | 0         | 0  |
|                  | NA       | NA      | NA     | NA          | NA       | NA       | NA        | NA |
|                  | NA       | NA      | NA     | NA          | NA       | NA       | NA        | NA |
|                  | NA       | NA      | NA     | NA          | NA       | NA       | NA        | NA |
|                  | NA       | NA      | NA     | NA          | NA       | NA       | NA        | 0  |
| Unknown          | NA       | Moffitt | hs37d5 | 8           | 38271346 | 38271346 | +         | 0  |
|                  | INS      | C       | C      | CTGT        | novel    | none     | MOF-AM5   | NA |
|                  | 0        | 0       | 0      | 0           | 0        | 0        | Unknown   |    |
| Unknown          | Untested | Somatic | NA     | WXS         | none     | 0        |           |    |
| Illumina_NextSeq | NA       | NA      | NA     | 0           | NA       | 0        | 0         | 0  |
|                  | 0        | 0       | 0      | 0           | 0        | 0        | NA        | NA |
|                  | NA       | NA      | NA     | NA          | NA       | NA       | NA        | NA |
|                  | NA       | NA      | NA     | NA          | NA       | NA       | NA        | NA |
|                  | NA       | NA      | NA     | NA          | NA       | NA       | NA        | NA |
|                  | NA       | NA      | NA     | NA          | NA       | NA       | 0         | NA |
|                  | NA       | NA      | NA     | NA          | NA       | 0        | 0         | NA |

|                  |     |         |        |    |          |          |         |    |
|------------------|-----|---------|--------|----|----------|----------|---------|----|
|                  | NA  | NA      | NA     | NA | NA       | NA       | NA      | NA |
|                  | NA  | NA      | NA     | NA | NA       | NA       | NA      | NA |
|                  | NA  | NA      | NA     | NA | NA       | NA       | NA      | NA |
|                  | NA  | NA      | NA     | NA | NA       | NA       | 0       |    |
| Unknown          | NA  | Moffitt | hs37d5 | 8  | 50456957 | 50456957 | +       | 0  |
|                  | SNP | G       | G      | C  | novel    | none     | MOF-MA1 | NA |
|                  | 0   | 0       | 0      | 0  | 0        | 0        | Unknown |    |
| Untested Somatic | NA  | WXS     | none   | 0  | 0        |          |         |    |
| Illumina_NextSeq | NA  | NA      | 0      | NA | 0        | 0        | 0       | 0  |
|                  | 0   | 0       | 0      | 0  | 0        | 0        | NA      | NA |
|                  | NA  | NA      | NA     | NA | NA       | NA       | NA      | NA |
|                  | NA  | NA      | NA     | NA | NA       | NA       | NA      | NA |
|                  | NA  | NA      | NA     | NA | NA       | NA       | NA      | NA |
|                  | NA  | NA      | NA     | NA | NA       | NA       | 0       | NA |
|                  | NA  | NA      | NA     | NA | NA       | 0        | 0       | NA |
|                  | NA  | NA      | NA     | NA | NA       | NA       | NA      | NA |
|                  | NA  | NA      | NA     | NA | NA       | NA       | NA      | NA |
|                  | NA  | NA      | NA     | NA | NA       | NA       | NA      | NA |
|                  | NA  | NA      | NA     | NA | NA       | NA       | 0       | NA |
| Unknown          | NA  | Moffitt | hs37d5 | 8  | 51503372 | 51503372 | +       | 0  |
|                  | SNP | A       | A      | C  | novel    | none     | MOF-MA1 | NA |
|                  | 0   | 0       | 0      | 0  | 0        | 0        | Unknown |    |
| Untested Somatic | NA  | WXS     | none   | 0  | 0        |          |         |    |
| Illumina_NextSeq | NA  | NA      | 0      | NA | 0        | 0        | 0       | 0  |
|                  | 0   | 0       | 0      | 0  | 0        | 0        | NA      | NA |
|                  | NA  | NA      | NA     | NA | NA       | NA       | NA      | NA |
|                  | NA  | NA      | NA     | NA | NA       | NA       | NA      | NA |
|                  | NA  | NA      | NA     | NA | NA       | NA       | NA      | NA |
|                  | NA  | NA      | NA     | NA | NA       | NA       | 0       | NA |
|                  | NA  | NA      | NA     | NA | NA       | 0        | 0       | NA |
|                  | NA  | NA      | NA     | NA | NA       | NA       | NA      | NA |
|                  | NA  | NA      | NA     | NA | NA       | NA       | NA      | NA |
|                  | NA  | NA      | NA     | NA | NA       | NA       | NA      | NA |
|                  | NA  | NA      | NA     | NA | NA       | NA       | 0       | NA |
| Unknown          | NA  | Moffitt | hs37d5 | 8  | 51664681 | 51664681 | +       | 0  |
|                  | SNP | A       | A      | G  | novel    | none     | MOF-MA1 | NA |
|                  | 0   | 0       | 0      | 0  | 0        | 0        | Unknown |    |
| Untested Somatic | NA  | WXS     | none   | 0  | 0        |          |         |    |
| Illumina_NextSeq | NA  | NA      | 0      | NA | 0        | 0        | 0       | 0  |
|                  | 0   | 0       | 0      | 0  | 0        | 0        | NA      | NA |
|                  | NA  | NA      | NA     | NA | NA       | NA       | NA      | NA |
|                  | NA  | NA      | NA     | NA | NA       | NA       | NA      | NA |
|                  | NA  | NA      | NA     | NA | NA       | NA       | NA      | NA |
|                  | NA  | NA      | NA     | NA | NA       | NA       | 0       | NA |
|                  | NA  | NA      | NA     | NA | NA       | 0        | 0       | NA |
|                  | NA  | NA      | NA     | NA | NA       | NA       | NA      | NA |
|                  | NA  | NA      | NA     | NA | NA       | NA       | NA      | NA |
|                  | NA  | NA      | NA     | NA | NA       | NA       | NA      | NA |
|                  | NA  | NA      | NA     | NA | NA       | NA       | 0       | NA |
| Unknown          | NA  | Moffitt | hs37d5 | 8  | 51664753 | 51664753 | +       | 0  |

|                   |                  |                  |        |      |                   |            |         |    |
|-------------------|------------------|------------------|--------|------|-------------------|------------|---------|----|
|                   | SNP              | T                | T      | A    | novel             | none       | MOF-MA1 | NA |
|                   | 0                | 0                | 0      | 0    | 0                 | 0          | Unknown |    |
| Untested Somatic  | NA               | NA               | WXS    | none | 0                 | 0          |         |    |
| Illumina_NextSeq  | NA               | NA               | NA     | 0    | NA                | 0          | 0       | 0  |
|                   | 0                | 0                | 0      | 0    | 0                 | 0          | NA      | NA |
|                   | NA               | NA               | NA     | NA   | NA                | NA         | NA      | NA |
|                   | NA               | NA               | NA     | NA   | NA                | NA         | NA      | NA |
|                   | NA               | NA               | NA     | NA   | NA                | NA         | NA      | NA |
|                   | NA               | NA               | NA     | NA   | NA                | NA         | 0       | NA |
|                   | NA               | NA               | NA     | NA   | NA                | 0          | 0       | NA |
|                   | NA               | NA               | NA     | NA   | NA                | NA         | NA      | NA |
|                   | NA               | NA               | NA     | NA   | NA                | NA         | NA      | NA |
|                   | NA               | NA               | NA     | NA   | NA                | NA         | NA      | NA |
|                   | NA               | NA               | NA     | NA   | NA                | NA         | NA      | NA |
|                   | NA               | NA               | NA     | NA   | NA                | NA         | NA      | NA |
|                   | NA               | NA               | NA     | NA   | NA                | NA         | 0       |    |
| TRIM55            | NA               | Moffitt          | hs37d5 | 8    | 67047229          | 67047229 + |         |    |
| Missense_Mutation |                  |                  | SNP    | G    | G                 | A          | novel   |    |
| none              | MOF-MA1          | NA               | 0      | 0    | 0                 | 0          | 0       | 0  |
|                   | Unknown          | Untested Somatic | NA     | NA   | WXS               | none       | 0       | 0  |
|                   | Illumina_NextSeq | NA               | NA     | NA   | c.G346A           | NA         | p.E116K |    |
| NM_184085         |                  | exon3            | 0      | 0    | 0                 | 0          | 0       | 0  |
|                   | NA               | NA               | NA     | NA   | NA                | NA         | NA      | NA |
|                   | NA               | NA               | NA     | NA   | NA                | NA         | NA      | NA |
|                   | NA               | NA               | NA     | NA   | NA                | NA         | NA      | NA |
|                   | NA               | NA               | NA     | NA   | benign            | NA         | NA      | NA |
|                   | 0                | NA               | NA     | NA   | NA                | NA         | NA      | 0  |
|                   | 0                | NA               | NA     | NA   | NA                | NA         | NA      | NA |
|                   | NA               | NA               | NA     | NA   | NA                | NA         | NA      | NA |
|                   | NA               | NA               | NA     | NA   | NA                | NA         | NA      | NA |
|                   | NA               | NA               | NA     | NA   | NA                | NA         | NA      | NA |
|                   | 0                |                  |        |      |                   |            |         |    |
| C8orf46           | NA               | Moffitt          | hs37d5 | 8    | 67428178          | 67428178 + |         |    |
| Missense_Mutation |                  |                  | SNP    | G    | G                 | A          | novel   |    |
| none              | MOF-MA1          | NA               | 0      | 0    | 0                 | 0          | 0       | 0  |
|                   | Unknown          | Untested Somatic | NA     | NA   | WXS               | none       | 0       | 0  |
|                   | Illumina_NextSeq | NA               | NA     | NA   | c.G491A           | NA         | p.G164E |    |
| NM_152765         |                  | exon6            | 0      | 0    | 0                 | 0          | 0       | 0  |
|                   | NA               | NA               | NA     | NA   | NA                | NA         | NA      | NA |
|                   | NA               | NA               | NA     | NA   | NA                | NA         | NA      | NA |
|                   | NA               | NA               | NA     | NA   | NA                | NA         | NA      | NA |
|                   | NA               | NA               | NA     | NA   | probably_damaging |            | NA      | NA |
|                   | NA               | NA               | 0      | NA   | NA                | NA         | NA      | NA |
|                   | NA               | 0                | 0      | NA   | NA                | NA         | NA      | NA |
|                   | NA               | NA               | NA     | NA   | NA                | NA         | NA      | NA |
|                   | NA               | NA               | NA     | NA   | NA                | NA         | NA      | NA |
|                   | NA               | NA               | NA     | NA   | NA                | NA         | NA      | NA |
|                   | NA               | NA               | NA     | NA   | NA                | NA         | NA      | NA |
|                   | NA               | NA               | 0      |      |                   |            |         |    |
| Unknown           | NA               | Moffitt          | hs37d5 | 8    | 72967850          | 72967850 + |         | 0  |
|                   | SNP              | G                | G      | T    | novel             | none       | MOF-MA1 | NA |
|                   | 0                | 0                | 0      | 0    | 0                 | 0          | Unknown |    |
| Untested Somatic  | NA               | NA               | WXS    | none | 0                 | 0          |         |    |









|           |                  |                   |                  |          |           |      |           |    |
|-----------|------------------|-------------------|------------------|----------|-----------|------|-----------|----|
| EFR3A     | NA               | NA                | NA               | NA       | NA        | NA   | NA        | 0  |
|           | NA               | Moffitt           | hs37d5           | 8        | 132957041 |      | 132957041 |    |
|           | +                | Missense_Mutation |                  |          | SNP       | C    | C         | G  |
|           | novel            | none              | MOF-AM2          | NA       | 0         | 0    | 0         | 0  |
|           | 0                | 0                 | Unknown          | Untested | Somatic   | NA   | WXS       |    |
| none      | 0                | 0                 | Illumina_NextSeq | NA       | NA        | NA   | c.C137G   | NA |
|           | p.S46C           | NM_015137         |                  | exon3    | 0         | 0    | 0         | 0  |
|           | 0                | 0                 | NA               | NA       | NA        | NA   | NA        | NA |
|           | NA               | NA                | NA               | NA       | NA        | NA   | NA        | NA |
|           | NA               | NA                | NA               | NA       | NA        | NA   | NA        | NA |
|           | NA               | NA                | NA               | NA       | NA        | NA   | NA        | NA |
|           | NA               | NA                | 0                | NA       | NA        | NA   | NA        | NA |
|           | NA               | 0                 | 0                | NA       | NA        | NA   | NA        | NA |
|           | NA               | NA                | NA               | NA       | NA        | NA   | NA        | NA |
|           | NA               | NA                | NA               | NA       | NA        | NA   | NA        | NA |
|           | NA               | NA                | NA               | NA       | NA        | NA   | NA        | NA |
|           | NA               | NA                | NA               | NA       | NA        | NA   | NA        | NA |
|           | NA               | NA                | 0                | NA       | NA        | NA   | NA        | NA |
| EFR3A     | NA               | Moffitt           | hs37d5           | 8        | 132958815 |      | 132958815 |    |
|           | +                | Missense_Mutation |                  |          | SNP       | C    | C         | T  |
|           | novel            | none              | MOF-AM2          | NA       | 0         | 0    | 0         | 0  |
|           | 0                | 0                 | Unknown          | Untested | Somatic   | NA   | WXS       |    |
| none      | 0                | 0                 | Illumina_NextSeq | NA       | NA        | NA   | c.C301T   | NA |
|           | p.L101F          | NM_015137         |                  | exon4    | 0         | 0    | 0         | 0  |
|           | 0                | 0                 | NA               | NA       | NA        | NA   | NA        | NA |
|           | NA               | NA                | NA               | NA       | NA        | NA   | NA        | NA |
|           | NA               | NA                | NA               | NA       | NA        | NA   | NA        | NA |
|           | NA               | NA                | NA               | NA       | NA        | NA   | NA        | NA |
|           | NA               | NA                | 0                | NA       | NA        | NA   | NA        | NA |
|           | NA               | 0                 | 0                | NA       | NA        | NA   | NA        | NA |
|           | NA               | NA                | NA               | NA       | NA        | NA   | NA        | NA |
|           | NA               | NA                | NA               | NA       | NA        | NA   | NA        | NA |
|           | NA               | NA                | NA               | NA       | NA        | NA   | NA        | NA |
|           | NA               | NA                | NA               | NA       | NA        | NA   | NA        | NA |
|           | NA               | NA                | 0                | NA       | NA        | NA   | NA        | NA |
| ST3GAL1   | NA               | Moffitt           | hs37d5           | 8        | 134487998 |      | 134487998 |    |
|           | +                | Silent            | SNP              | G        | G         | A    | novel     |    |
| none      | MOF-MA1          | NA                | 0                | 0        | 0         | 0    | 0         | 0  |
|           | Unknown          | Untested          | Somatic          | NA       | WXS       | none | 0         | 0  |
|           | Illumina_NextSeq | NA                | NA               | NA       | c.C270T   | NA   | p.N90N    |    |
| NM_003033 |                  | exon4             | 0                | 0        | 0         | 0    | 0         | 0  |
|           | NA               | NA                | NA               | NA       | NA        | NA   | NA        | NA |
|           | NA               | NA                | NA               | NA       | NA        | NA   | NA        | NA |
|           | NA               | NA                | NA               | NA       | NA        | NA   | NA        | NA |
|           | NA               | NA                | NA               | NA       | NA        | NA   | NA        | NA |
|           | 0.0005           | NA                | NA               | NA       | NA        | NA   | NA        | NA |
| 0.013845  | 0.000000         | NA                | NA               | NA       | NA        | NA   | NA        | NA |
|           | NA               | NA                | NA               | NA       | NA        | NA   | NA        | NA |
|           | NA               | NA                | NA               | NA       | NA        | NA   | NA        | NA |
|           | NA               | NA                | NA               | NA       | NA        | NA   | NA        | NA |
|           | 0                |                   |                  |          |           |      |           |    |
| Unknown   | NA               | Moffitt           | hs37d5           | 8        | 143833932 |      | 143833932 |    |

|                   |                  |          |         |       |           |          |           |    |
|-------------------|------------------|----------|---------|-------|-----------|----------|-----------|----|
| none              | +                | 0        | SNP     | A     | A         | G        | novel     |    |
|                   | MOF-AM2          | NA       | 0       | 0     | 0         | 0        | 0         | 0  |
|                   | Unknown          | Untested | Somatic | NA    | WXS       | none     | 0         | 0  |
|                   | Illumina_NextSeq | NA       | NA      | NA    | 0         | NA       | 0         | 0  |
|                   | 0                | 0        | 0       | 0     | 0         | 0        | 0         | NA |
|                   | NA               | NA       | NA      | NA    | NA        | NA       | NA        | NA |
|                   | NA               | NA       | NA      | NA    | NA        | NA       | NA        | NA |
|                   | NA               | NA       | NA      | NA    | NA        | NA       | NA        | NA |
|                   | NA               | NA       | NA      | NA    | NA        | NA       | NA        | 0  |
|                   | NA               | NA       | NA      | NA    | NA        | NA       | 0         | 0  |
| Unknown           | NA               | Moffitt  | hs37d5  | 8     | 145736998 |          | 145736998 |    |
| none              | +                | 0        | SNP     | T     | T         | C        | novel     |    |
|                   | MOF-MA1          | NA       | 0       | 0     | 0         | 0        | 0         | 0  |
|                   | Unknown          | Untested | Somatic | NA    | WXS       | none     | 0         | 0  |
|                   | Illumina_NextSeq | NA       | NA      | NA    | 0         | NA       | 0         | 0  |
|                   | 0                | 0        | 0       | 0     | 0         | 0        | 0         | NA |
|                   | NA               | NA       | NA      | NA    | NA        | NA       | NA        | NA |
|                   | NA               | NA       | NA      | NA    | NA        | NA       | NA        | NA |
|                   | NA               | NA       | NA      | NA    | NA        | NA       | NA        | NA |
|                   | NA               | NA       | NA      | NA    | NA        | NA       | NA        | 0  |
|                   | NA               | NA       | NA      | NA    | NA        | NA       | 0         | 0  |
| CER1              | NA               | Moffitt  | hs37d5  | 9     | 14720122  | 14720122 | +         |    |
| Missense_Mutation |                  |          | SNP     | G     | G         | A        | novel     |    |
| none              | MOF-MA1          | NA       | 0       | 0     | 0         | 0        | 0         | 0  |
|                   | Unknown          | Untested | Somatic | NA    | WXS       | none     | 0         | 0  |
|                   | Illumina_NextSeq | NA       | NA      | NA    | c.C770T   | NA       | p.S257F   |    |
|                   | NM_005454        | exon2    | 0       | 0     | 0         | 0        | 0         | 0  |
|                   | NA               | NA       | NA      | NA    | NA        | NA       | NA        | NA |
|                   | NA               | NA       | NA      | NA    | NA        | NA       | NA        | NA |
|                   | NA               | NA       | NA      | NA    | NA        | NA       | NA        | NA |
|                   | NA               | NA       | NA      | NA    | benign    | NA       | NA        | NA |
|                   | 0                | NA       | NA      | NA    | NA        | NA       | NA        | 0  |
|                   | 0                | NA       | NA      | NA    | NA        | NA       | NA        | NA |
| Unknown           | NA               | Moffitt  | hs37d5  | 9     | 16664970  | 16664970 | +         | 0  |
| SNP               | C                | C        | G       | novel | none      | MOF-MA1  | NA        |    |
| 0                 | 0                | 0        | 0       | 0     | 0         | Unknown  |           |    |
| Untested Somatic  | NA               | WXS      | none    | 0     | 0         |          |           |    |
| Illumina_NextSeq  | NA               | NA       | 0       | NA    | 0         | 0        | 0         |    |





|         |                  |          |         |    |           |      |           |    |
|---------|------------------|----------|---------|----|-----------|------|-----------|----|
|         | NA               | NA       | NA      | NA | NA        | NA   | NA        | NA |
|         | NA               | NA       | NA      | NA | NA        | NA   | NA        | NA |
|         | 0                |          |         |    |           |      |           |    |
| Unknown | NA               | Moffitt  | hs37d5  | 9  | 133911733 |      | 133911733 |    |
|         | +                | 0        | SNP     | T  | T         | G    | novel     |    |
| none    | MOF-AM2          | NA       | 0       | 0  | 0         | 0    | 0         | 0  |
|         | Unknown          | Untested | Somatic | NA | WXS       | none | 0         | 0  |
|         | Illumina_NextSeq | NA       | NA      | NA | 0         | NA   | 0         | 0  |
|         | 0                | 0        | 0       | 0  | 0         | 0    | 0         | NA |
|         | NA               | NA       | NA      | NA | NA        | NA   | NA        | NA |
|         | NA               | NA       | NA      | NA | NA        | NA   | NA        | NA |
|         | NA               | NA       | NA      | NA | NA        | NA   | NA        | NA |
|         | NA               | NA       | NA      | NA | NA        | NA   | NA        | 0  |
|         | NA               | NA       | NA      | NA | NA        | NA   | 0         | 0  |
|         | NA               | NA       | NA      | NA | NA        | NA   | NA        | NA |
|         | NA               | NA       | NA      | NA | NA        | NA   | NA        | NA |
|         | NA               | NA       | NA      | NA | NA        | NA   | NA        | NA |
|         | NA               | NA       | NA      | NA | NA        | NA   | NA        | 0  |
| Unknown | NA               | Moffitt  | hs37d5  | 9  | 136304406 |      | 136304406 |    |
|         | +                | 0        | SNP     | G  | G         | A    | novel     |    |
| none    | MOF-AM2          | NA       | 0       | 0  | 0         | 0    | 0         | 0  |
|         | Unknown          | Untested | Somatic | NA | WXS       | none | 0         | 0  |
|         | Illumina_NextSeq | NA       | NA      | NA | 0         | NA   | 0         | 0  |
|         | 0                | 0        | 0       | 0  | 0         | 0    | 0         | NA |
|         | NA               | NA       | NA      | NA | NA        | NA   | NA        | NA |
|         | NA               | NA       | NA      | NA | NA        | NA   | NA        | NA |
|         | NA               | NA       | NA      | NA | NA        | NA   | NA        | NA |
|         | NA               | NA       | NA      | NA | NA        | NA   | NA        | 0  |
|         | NA               | NA       | NA      | NA | NA        | NA   | 0         | 0  |
|         | NA               | NA       | NA      | NA | NA        | NA   | NA        | NA |
|         | NA               | NA       | NA      | NA | NA        | NA   | NA        | NA |
|         | NA               | NA       | NA      | NA | NA        | NA   | NA        | NA |
|         | NA               | NA       | NA      | NA | NA        | NA   | NA        | 0  |
| Unknown | NA               | Moffitt  | hs37d5  | 9  | 136517262 |      | 136517262 |    |
|         | +                | 0        | SNP     | A  | A         | C    | novel     |    |
| none    | MOF-AM5          | NA       | 0       | 0  | 0         | 0    | 0         | 0  |
|         | Unknown          | Untested | Somatic | NA | WXS       | none | 0         | 0  |
|         | Illumina_NextSeq | NA       | NA      | NA | 0         | NA   | 0         | 0  |
|         | 0                | 0        | 0       | 0  | 0         | 0    | 0         | NA |
|         | NA               | NA       | NA      | NA | NA        | NA   | NA        | NA |
|         | NA               | NA       | NA      | NA | NA        | NA   | NA        | NA |
|         | NA               | NA       | NA      | NA | NA        | NA   | NA        | NA |
|         | NA               | NA       | NA      | NA | NA        | NA   | NA        | 0  |
|         | NA               | NA       | NA      | NA | NA        | NA   | 0         | 0  |
|         | NA               | NA       | NA      | NA | NA        | NA   | NA        | NA |
|         | NA               | NA       | NA      | NA | NA        | NA   | NA        | NA |
|         | NA               | NA       | NA      | NA | NA        | NA   | NA        | NA |
|         | NA               | NA       | NA      | NA | NA        | NA   | NA        | 0  |
| Unknown | NA               | Moffitt  | hs37d5  | 9  | 136629256 |      | 136629256 |    |
|         | +                | 0        | SNP     | C  | C         | G    | novel     |    |



|           |                   |                   |                  |          |           |           |       |    |
|-----------|-------------------|-------------------|------------------|----------|-----------|-----------|-------|----|
| none      | MOF-AM2           | NA                | 0                | 0        | 0         | 0         | 0     | 0  |
|           | Unknown           | Untested          | Somatic          | NA       | WXS       | none      | 0     | 0  |
|           | Illumina_NextSeq  | NA                | NA               | 0        | 0         | NA        | 0     | 0  |
|           | 0                 | 0                 | 0                | 0        | 0         | 0         | 0     | NA |
|           | NA                | NA                | NA               | NA       | NA        | NA        | NA    | NA |
|           | NA                | NA                | NA               | NA       | NA        | NA        | NA    | NA |
|           | NA                | NA                | NA               | NA       | NA        | NA        | NA    | NA |
|           | NA                | NA                | NA               | NA       | NA        | NA        | NA    | 0  |
|           | NA                | NA                | NA               | NA       | NA        | NA        | 0     | 0  |
|           | NA                | NA                | NA               | NA       | NA        | NA        | NA    | NA |
|           | NA                | NA                | NA               | NA       | NA        | NA        | NA    | NA |
|           | NA                | NA                | NA               | NA       | NA        | NA        | NA    | NA |
|           | NA                | NA                | NA               | NA       | NA        | NA        | NA    | 0  |
| Unknown   | NA                | Moffitt           | hs37d5           | 9        | 139401911 | 139401911 |       |    |
|           | +                 | 0                 | SNP              | G        | G         | A         | novel |    |
| none      | MOF-AM2           | NA                | 0                | 0        | 0         | 0         | 0     | 0  |
|           | Unknown           | Untested          | Somatic          | NA       | WXS       | none      | 0     | 0  |
|           | Illumina_NextSeq  | NA                | NA               | 0        | 0         | NA        | 0     | 0  |
|           | 0                 | 0                 | 0                | 0        | 0         | 0         | 0     | NA |
|           | NA                | NA                | NA               | NA       | NA        | NA        | NA    | NA |
|           | NA                | NA                | NA               | NA       | NA        | NA        | NA    | NA |
|           | NA                | NA                | NA               | NA       | NA        | NA        | NA    | NA |
|           | NA                | NA                | NA               | NA       | NA        | NA        | NA    | 0  |
|           | NA                | NA                | NA               | NA       | NA        | NA        | 0     | 0  |
|           | NA                | NA                | NA               | NA       | NA        | NA        | NA    | NA |
|           | NA                | NA                | NA               | NA       | NA        | NA        | NA    | NA |
|           | NA                | NA                | NA               | NA       | NA        | NA        | NA    | NA |
|           | NA                | NA                | NA               | NA       | NA        | NA        | NA    | 0  |
| C9orf172  | NA                | Moffitt           | hs37d5           | 9        | 139740409 | 139740409 |       |    |
|           | +                 | Missense_Mutation |                  | SNP      | G         | G         | A     |    |
|           | novel             | none              | MOF-MA1          | NA       | 0         | 0         | 0     | 0  |
|           | 0                 | 0                 | Unknown          | Untested | Somatic   | NA        | WXS   |    |
| none      | 0                 | 0                 | Illumina_NextSeq | NA       | NA        | c.G1543A  | NA    |    |
|           | p.E515K           | NM_001080482      | exon1            | 0        | 0         | 0         | 0     |    |
|           | 0                 | 0                 | NA               | NA       | NA        | NA        | NA    | NA |
|           | NA                | NA                | NA               | NA       | NA        | NA        | NA    | NA |
|           | NA                | NA                | NA               | NA       | NA        | NA        | NA    | NA |
|           | NA                | NA                | NA               | NA       | NA        | NA        | NA    | NA |
|           | NA                | NA                | 0                | NA       | NA        | NA        | NA    | NA |
|           | NA                | 0                 | 0                | NA       | NA        | NA        | NA    | NA |
|           | NA                | NA                | NA               | NA       | NA        | NA        | NA    | NA |
|           | NA                | NA                | NA               | NA       | NA        | NA        | NA    | NA |
|           | NA                | NA                | NA               | NA       | NA        | NA        | NA    | NA |
|           | NA                | NA                | 0                |          |           |           |       |    |
| SHOX      | NA                | Moffitt           | hs37d5           | X        | 595517    | 595517    | +     |    |
|           | Missense_Mutation |                   | SNP              | G        | G         | A         | novel |    |
| none      | MOF-AM2           | NA                | 0                | 0        | 0         | 0         | 0     | 0  |
|           | Unknown           | Untested          | Somatic          | NA       | WXS       | none      | 0     | 0  |
|           | Illumina_NextSeq  | NA                | NA               | c.G442A  | NA        | p.E148K   |       |    |
| NM_000451 |                   | exon3             | 0                | 0        | 0         | 0         | 0     | 0  |

|                   |                  |                  |        |          |                   |            |         |    |
|-------------------|------------------|------------------|--------|----------|-------------------|------------|---------|----|
|                   | NA               | NA               | NA     | NA       | NA                | NA         | NA      | NA |
|                   | NA               | NA               | NA     | NA       | NA                | NA         | NA      | NA |
|                   | NA               | NA               | NA     | NA       | NA                | NA         | NA      | NA |
|                   | NA               | NA               | NA     | NA       | NA                | NA         | NA      | NA |
|                   | 0                | NA               | NA     | NA       | NA                | NA         | NA      | 0  |
|                   | 0                | NA               | NA     | NA       | NA                | NA         | NA      | NA |
|                   | NA               | NA               | NA     | NA       | NA                | NA         | NA      | NA |
|                   | NA               | NA               | NA     | NA       | NA                | NA         | NA      | NA |
|                   | NA               | NA               | NA     | NA       | NA                | NA         | NA      | NA |
|                   | 0                |                  |        |          |                   |            |         |    |
| Unknown           | NA               | Moffitt          | hs37d5 | X        | 13762741          | 13762741 + |         | 0  |
|                   | SNP              | G                | G      | A        | novel             | none       | MOF-MA1 | NA |
|                   | 0                | 0                | 0      | 0        | 0                 | 0          | Unknown |    |
| Untested Somatic  | NA               | WXS              | none   |          | 0                 | 0          |         |    |
| Illumina_NextSeq  | NA               | NA               | 0      | NA       | 0                 | 0          | 0       | 0  |
|                   | 0                | 0                | 0      | 0        | 0                 | 0          | NA      | NA |
|                   | NA               | NA               | NA     | NA       | NA                | NA         | NA      | NA |
|                   | NA               | NA               | NA     | NA       | NA                | NA         | NA      | NA |
|                   | NA               | NA               | NA     | NA       | NA                | NA         | NA      | NA |
|                   | NA               | NA               | NA     | NA       | NA                | NA         | 0       | NA |
|                   | NA               | NA               | NA     | NA       | NA                | 0          | 0       | NA |
|                   | NA               | NA               | NA     | NA       | NA                | NA         | NA      | NA |
|                   | NA               | NA               | NA     | NA       | NA                | NA         | NA      | NA |
|                   | NA               | NA               | NA     | NA       | NA                | NA         | NA      | NA |
|                   | NA               | NA               | NA     | NA       | NA                | NA         | 0       | NA |
| Unknown           | NA               | Moffitt          | hs37d5 | X        | 13762742          | 13762742 + |         | 0  |
|                   | SNP              | G                | G      | A        | novel             | none       | MOF-MA1 | NA |
|                   | 0                | 0                | 0      | 0        | 0                 | 0          | Unknown |    |
| Untested Somatic  | NA               | WXS              | none   |          | 0                 | 0          |         |    |
| Illumina_NextSeq  | NA               | NA               | 0      | NA       | 0                 | 0          | 0       | 0  |
|                   | 0                | 0                | 0      | 0        | 0                 | 0          | NA      | NA |
|                   | NA               | NA               | NA     | NA       | NA                | NA         | NA      | NA |
|                   | NA               | NA               | NA     | NA       | NA                | NA         | NA      | NA |
|                   | NA               | NA               | NA     | NA       | NA                | NA         | NA      | NA |
|                   | NA               | NA               | NA     | NA       | NA                | NA         | 0       | NA |
|                   | NA               | NA               | NA     | NA       | NA                | 0          | 0       | NA |
|                   | NA               | NA               | NA     | NA       | NA                | NA         | NA      | NA |
|                   | NA               | NA               | NA     | NA       | NA                | NA         | NA      | NA |
|                   | NA               | NA               | NA     | NA       | NA                | NA         | NA      | NA |
|                   | NA               | NA               | NA     | NA       | NA                | NA         | NA      | NA |
|                   | NA               | NA               | NA     | NA       | NA                | NA         | 0       | NA |
| FAM47A            | NA               | Moffitt          | hs37d5 | X        | 34148877          | 34148877 + |         |    |
| Missense_Mutation |                  |                  | SNP    | C        | C                 | G          | novel   |    |
| none              | MOF-MA1          | NA               | 0      | 0        | 0                 | 0          | 0       | 0  |
|                   | Unknown          | Untested Somatic | NA     | WXS      | none              | 0          | 0       | 0  |
|                   | Illumina_NextSeq | NA               | NA     | c.G1519C | NA                | p.E507Q    |         |    |
| NM_203408         | exon1            | 0                | 0      | 0        | 0                 | 0          | 0       | 0  |
|                   | NA               | NA               | NA     | NA       | NA                | NA         | NA      | NA |
|                   | NA               | NA               | NA     | NA       | NA                | NA         | NA      | NA |
|                   | NA               | NA               | NA     | NA       | NA                | NA         | NA      | NA |
|                   | NA               | NA               | NA     | NA       | possibly_damaging |            |         | NA |



|                   |                  |          |         |    |           |          |           |    |
|-------------------|------------------|----------|---------|----|-----------|----------|-----------|----|
|                   | NA               | NA       | NA      | NA | NA        | NA       | NA        | NA |
|                   | NA               | NA       | NA      | NA | NA        | NA       | NA        | NA |
|                   | 0                |          |         |    |           |          |           |    |
| TEX11             | NA               | Moffitt  | hs37d5  | X  | 69749702  | 69749702 | +         |    |
| Missense_Mutation |                  |          | SNP     | C  | C         | T        | novel     |    |
| none              | MOF-MA1          | NA       | 0       | 0  | 0         | 0        | 0         | 0  |
|                   | Unknown          | Untested | Somatic | NA | WXS       | none     | 0         | 0  |
|                   | Illumina_NextSeq | NA       | NA      | NA | c.G2713A  | NA       | p.E905K   |    |
| NM_001003811      | exon30           | 0        | 0       | 0  | 0         | 0        | 0         | 0  |
|                   | NA               | NA       | NA      | NA | NA        | NA       | NA        | NA |
|                   | NA               | NA       | NA      | NA | NA        | NA       | NA        | NA |
|                   | NA               | NA       | NA      | NA | NA        | NA       | NA        | NA |
|                   | NA               | NA       | NA      | NA | benign    | NA       | NA        | NA |
|                   | 0                | NA       | NA      | NA | NA        | NA       | NA        | 0  |
|                   | 0                | NA       | NA      | NA | NA        | NA       | NA        | NA |
|                   | NA               | NA       | NA      | NA | NA        | NA       | NA        | NA |
|                   | NA               | NA       | NA      | NA | NA        | NA       | NA        | NA |
|                   | NA               | NA       | NA      | NA | NA        | NA       | NA        | NA |
|                   | 0                |          |         |    |           |          |           |    |
| Unknown           | NA               | Moffitt  | hs37d5  | X  | 106841407 |          | 106841407 |    |
|                   | +                | 0        | SNP     | C  | C         | T        | novel     |    |
| none              | MOF-AM2          | NA       | 0       | 0  | 0         | 0        | 0         | 0  |
|                   | Unknown          | Untested | Somatic | NA | WXS       | none     | 0         | 0  |
|                   | Illumina_NextSeq | NA       | NA      | NA | 0         | NA       | 0         | 0  |
|                   | 0                | 0        | 0       | 0  | 0         | 0        | 0         | NA |
|                   | NA               | NA       | NA      | NA | NA        | NA       | NA        | NA |
|                   | NA               | NA       | NA      | NA | NA        | NA       | NA        | NA |
|                   | NA               | NA       | NA      | NA | NA        | NA       | NA        | NA |
|                   | NA               | NA       | NA      | NA | NA        | NA       | NA        | 0  |
|                   | NA               | NA       | NA      | NA | NA        | NA       | 0         | 0  |
|                   | NA               | NA       | NA      | NA | NA        | NA       | NA        | NA |
|                   | NA               | NA       | NA      | NA | NA        | NA       | NA        | NA |
|                   | NA               | NA       | NA      | NA | NA        | NA       | NA        | NA |
|                   | NA               | NA       | NA      | NA | NA        | NA       | NA        | 0  |
| Unknown           | NA               | Moffitt  | hs37d5  | X  | 135080731 |          | 135080731 |    |
|                   | +                | 0        | SNP     | G  | G         | A        | novel     |    |
| none              | MOF-AM2          | NA       | 0       | 0  | 0         | 0        | 0         | 0  |
|                   | Unknown          | Untested | Somatic | NA | WXS       | none     | 0         | 0  |
|                   | Illumina_NextSeq | NA       | NA      | NA | 0         | NA       | 0         | 0  |
|                   | 0                | 0        | 0       | 0  | 0         | 0        | 0         | NA |
|                   | NA               | NA       | NA      | NA | NA        | NA       | NA        | NA |
|                   | NA               | NA       | NA      | NA | NA        | NA       | NA        | NA |
|                   | NA               | NA       | NA      | NA | NA        | NA       | NA        | NA |
|                   | NA               | NA       | NA      | NA | NA        | NA       | NA        | 0  |
|                   | NA               | NA       | NA      | NA | NA        | NA       | 0         | 0  |
|                   | NA               | NA       | NA      | NA | NA        | NA       | NA        | NA |
|                   | NA               | NA       | NA      | NA | NA        | NA       | NA        | NA |
|                   | NA               | NA       | NA      | NA | NA        | NA       | NA        | NA |
|                   | NA               | NA       | NA      | NA | NA        | NA       | NA        | 0  |
| BRS3              | NA               | Moffitt  | hs37d5  | X  | 135570472 |          | 135570472 |    |

|                   |                  |                   |                  |          |           |           |
|-------------------|------------------|-------------------|------------------|----------|-----------|-----------|
|                   | +                | Missense_Mutation | SNP              | A        | A         | C         |
|                   | novel            | none              | MOF-AM2          | NA       | 0         | 0         |
|                   | 0                | 0                 | Unknown          | Untested | Somatic   | NA        |
| none              | 0                | 0                 | Illumina_NextSeq | NA       | NA        | c.A199C   |
|                   | p.I67L           | NM_001727         | exon1            | 0        | 0         | 0         |
|                   | 0                | 0                 | NA               | NA       | NA        | NA        |
|                   | NA               | NA                | NA               | NA       | NA        | NA        |
|                   | NA               | NA                | NA               | NA       | NA        | NA        |
|                   | NA               | NA                | NA               | NA       | NA        | benign    |
|                   | NA               | NA                | 0                | NA       | NA        | NA        |
|                   | NA               | 0                 | 0                | NA       | NA        | NA        |
|                   | NA               | NA                | NA               | NA       | NA        | NA        |
|                   | NA               | NA                | NA               | NA       | NA        | NA        |
|                   | NA               | NA                | NA               | NA       | NA        | NA        |
|                   | NA               | NA                | 0                | NA       | NA        | NA        |
| Unknown           | NA               | Moffitt           | hs37d5           | X        | 151142969 | 151142969 |
|                   | +                | 0                 | INS              | C        | C         | CG        |
| none              | MOF-MA1          | NA                | 0                | 0        | 0         | 0         |
|                   | Unknown          | Untested          | Somatic          | NA       | WXS       | none      |
|                   | Illumina_NextSeq | NA                | NA               | 0        | NA        | 0         |
|                   | 0                | 0                 | 0                | 0        | 0         | 0         |
|                   | NA               | NA                | NA               | NA       | NA        | NA        |
|                   | NA               | NA                | NA               | NA       | NA        | NA        |
|                   | NA               | NA                | NA               | NA       | NA        | NA        |
|                   | NA               | NA                | NA               | NA       | NA        | NA        |
|                   | NA               | NA                | NA               | NA       | NA        | 0         |
|                   | NA               | NA                | NA               | NA       | NA        | 0         |
|                   | NA               | NA                | NA               | NA       | NA        | NA        |
|                   | NA               | NA                | NA               | NA       | NA        | NA        |
|                   | NA               | NA                | NA               | NA       | NA        | NA        |
|                   | NA               | NA                | NA               | NA       | NA        | NA        |
|                   | NA               | NA                | NA               | NA       | NA        | 0         |
| DUSP9             | NA               | Moffitt           | hs37d5           | X        | 152915503 | 152915503 |
|                   | +                | Missense_Mutation | SNP              | G        | G         | A         |
|                   | novel            | none              | MOF-AM2          | NA       | 0         | 0         |
|                   | 0                | 0                 | Unknown          | Untested | Somatic   | NA        |
| none              | 0                | 0                 | Illumina_NextSeq | NA       | NA        | c.G898A   |
|                   | p.V300I          | NM_001395         | exon4            | 0        | 0         | 0         |
|                   | 0                | 0                 | NA               | NA       | NA        | NA        |
|                   | NA               | NA                | NA               | NA       | NA        | NA        |
|                   | NA               | NA                | NA               | NA       | NA        | NA        |
|                   | NA               | NA                | NA               | NA       | NA        | NA        |
|                   | NA               | NA                | NA               | NA       | NA        | NA        |
|                   | NA               | NA                | NA               | NA       | NA        | 0         |
| possibly_damaging | NA               | NA                | NA               | NA       | 0         | NA        |
|                   | NA               | NA                | NA               | NA       | 0         | NA        |
|                   | NA               | NA                | NA               | NA       | NA        | NA        |
|                   | NA               | NA                | NA               | NA       | NA        | NA        |
|                   | NA               | NA                | NA               | NA       | NA        | NA        |
|                   | NA               | NA                | NA               | NA       | 0         | NA        |
| Unknown           | NA               | Moffitt           | hs37d5           | X        | 153357574 | 153357574 |
|                   | +                | 0                 | SNP              | T        | T         | A         |
| none              | MOF-MA1          | NA                | 0                | 0        | 0         | 0         |
|                   | Unknown          | Untested          | Somatic          | NA       | WXS       | none      |
|                   |                  |                   |                  |          |           | 0         |
|                   |                  |                   |                  |          |           | 0         |
